# Supplementary material for: Extensive cross-regulation of post-transcriptional regulatory networks in Drosophila
Source: PubMed Central journal article supplement (PMC4617965; doi:10.1101/gr.182675.114), 2015-11

Supplemental Figure 1

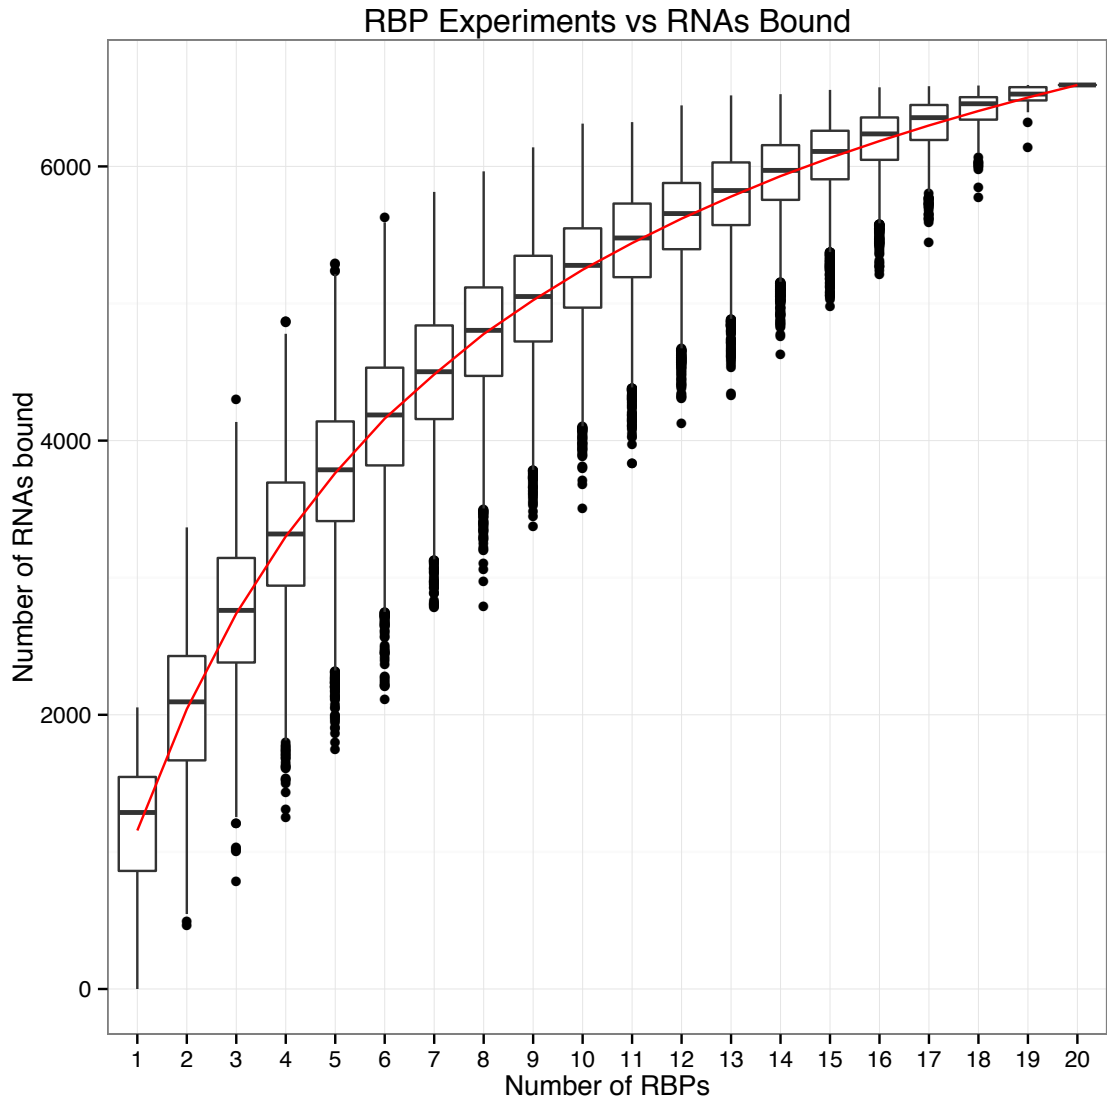



### Supplemental Figure 3

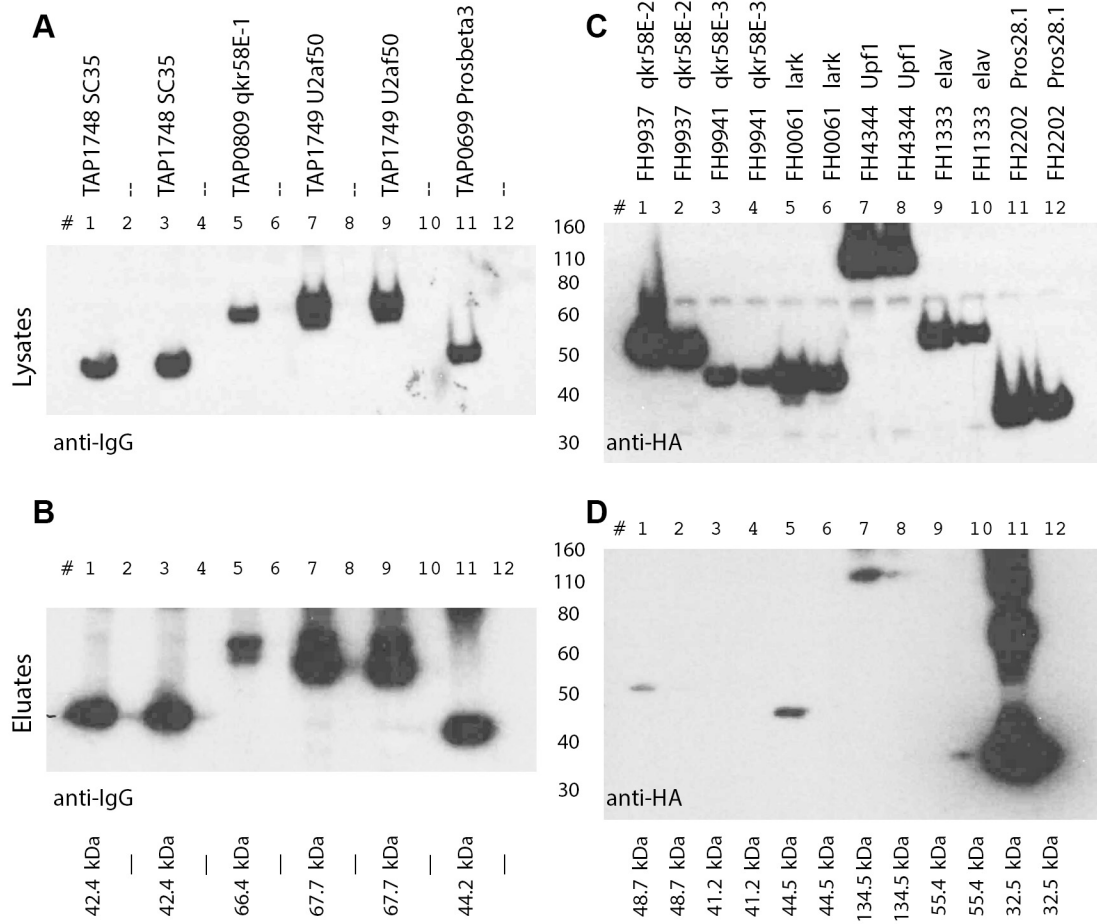

Supplemental Figure 4

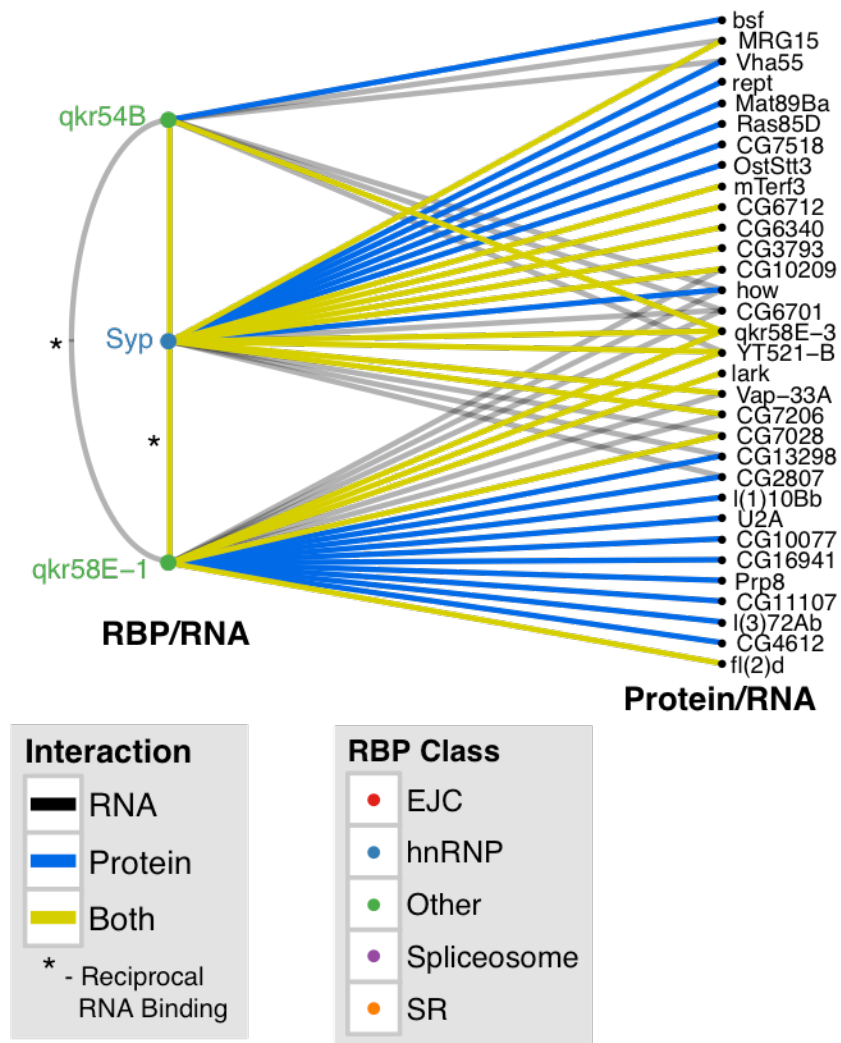

# Supplemental Figure 5

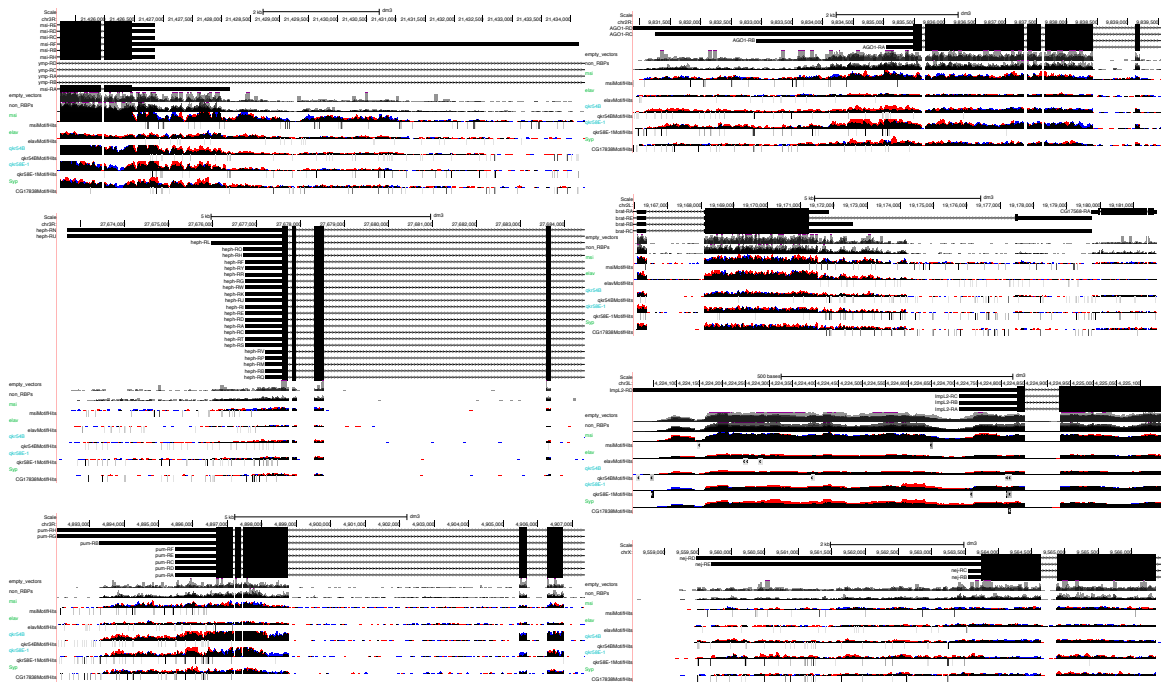

Supplemental Figure 6 (faceted by Motif Enrichment / Control Sample and all samples together)

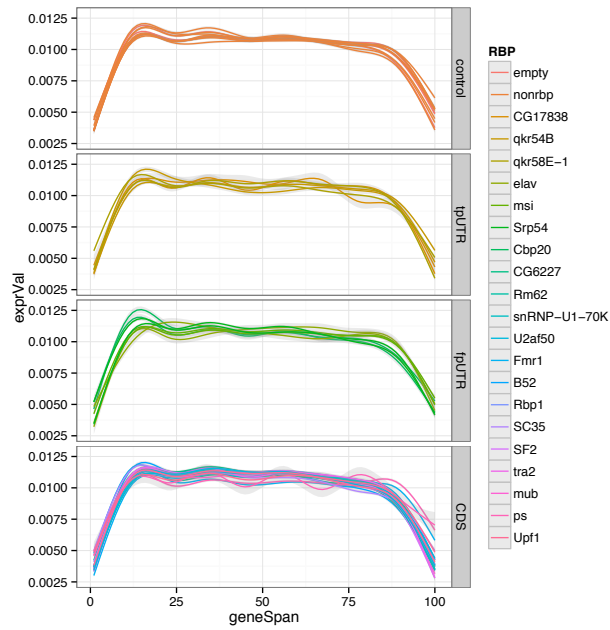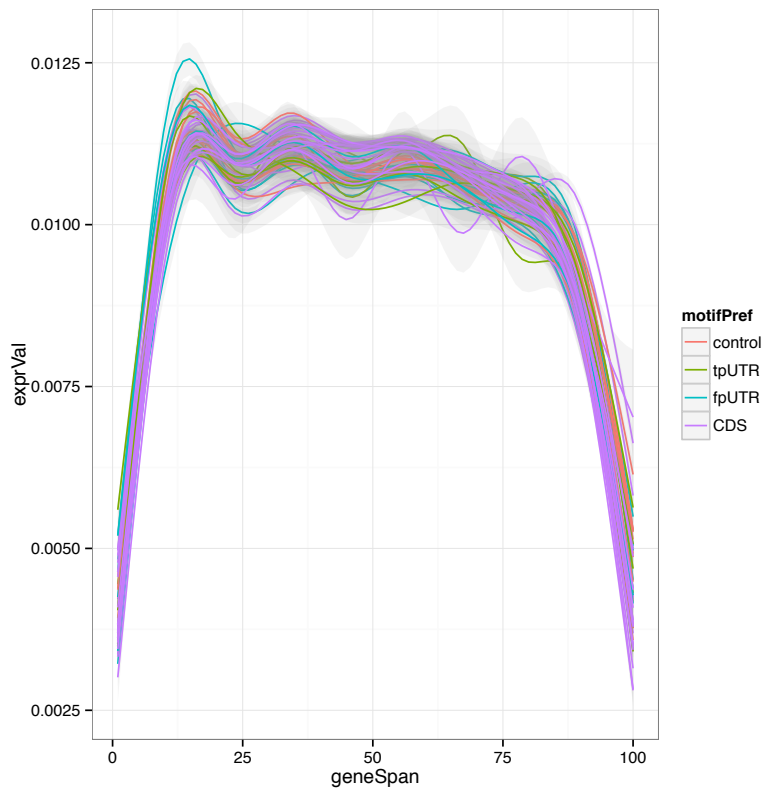

Supplemental Figure 7

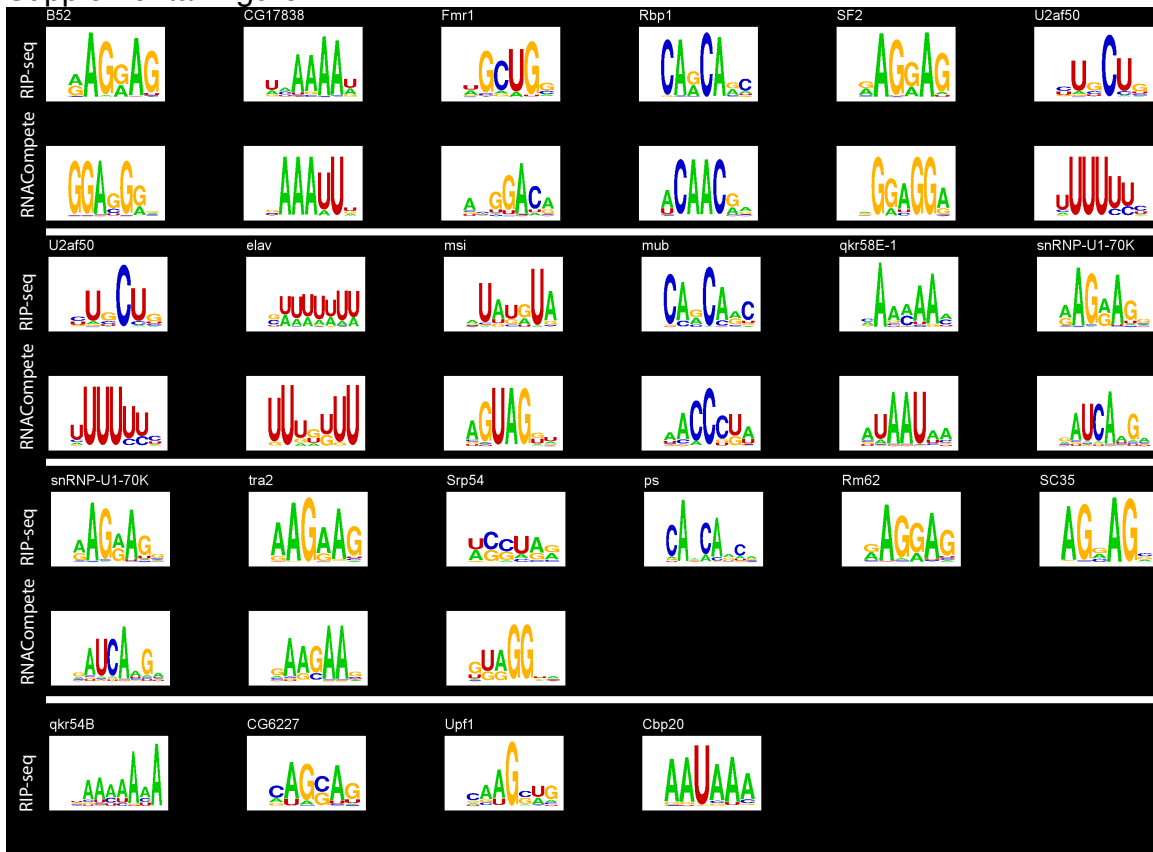

Supplemental Figure 8

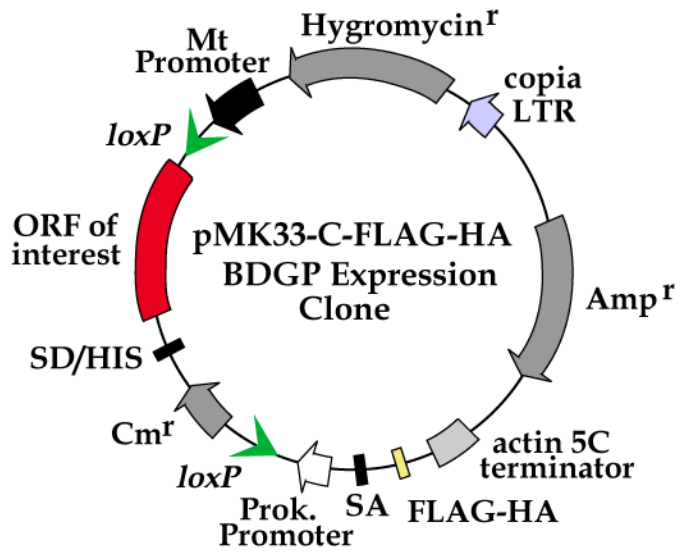



Supplemental Figure 9

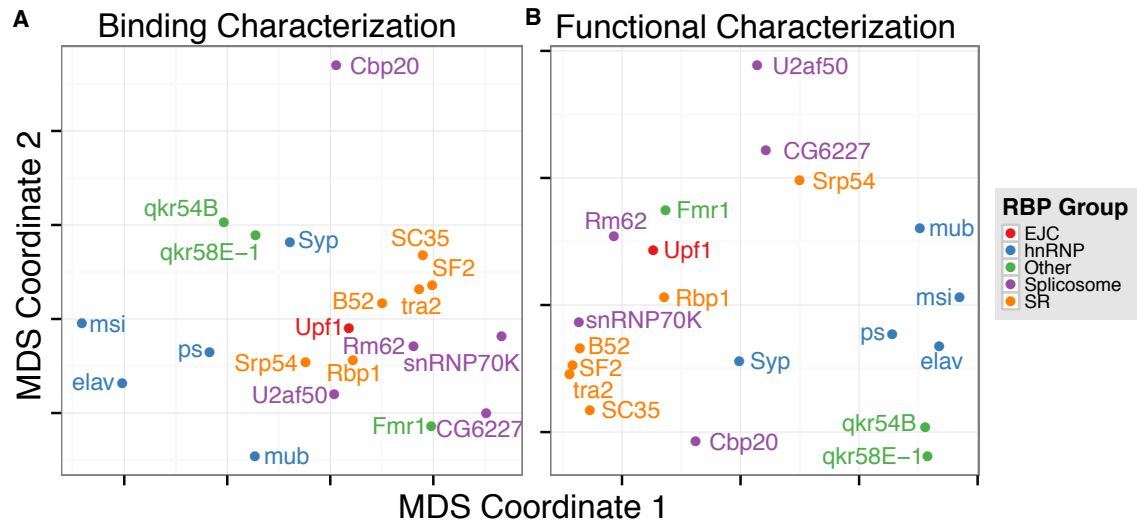

Supplemental Figure 10

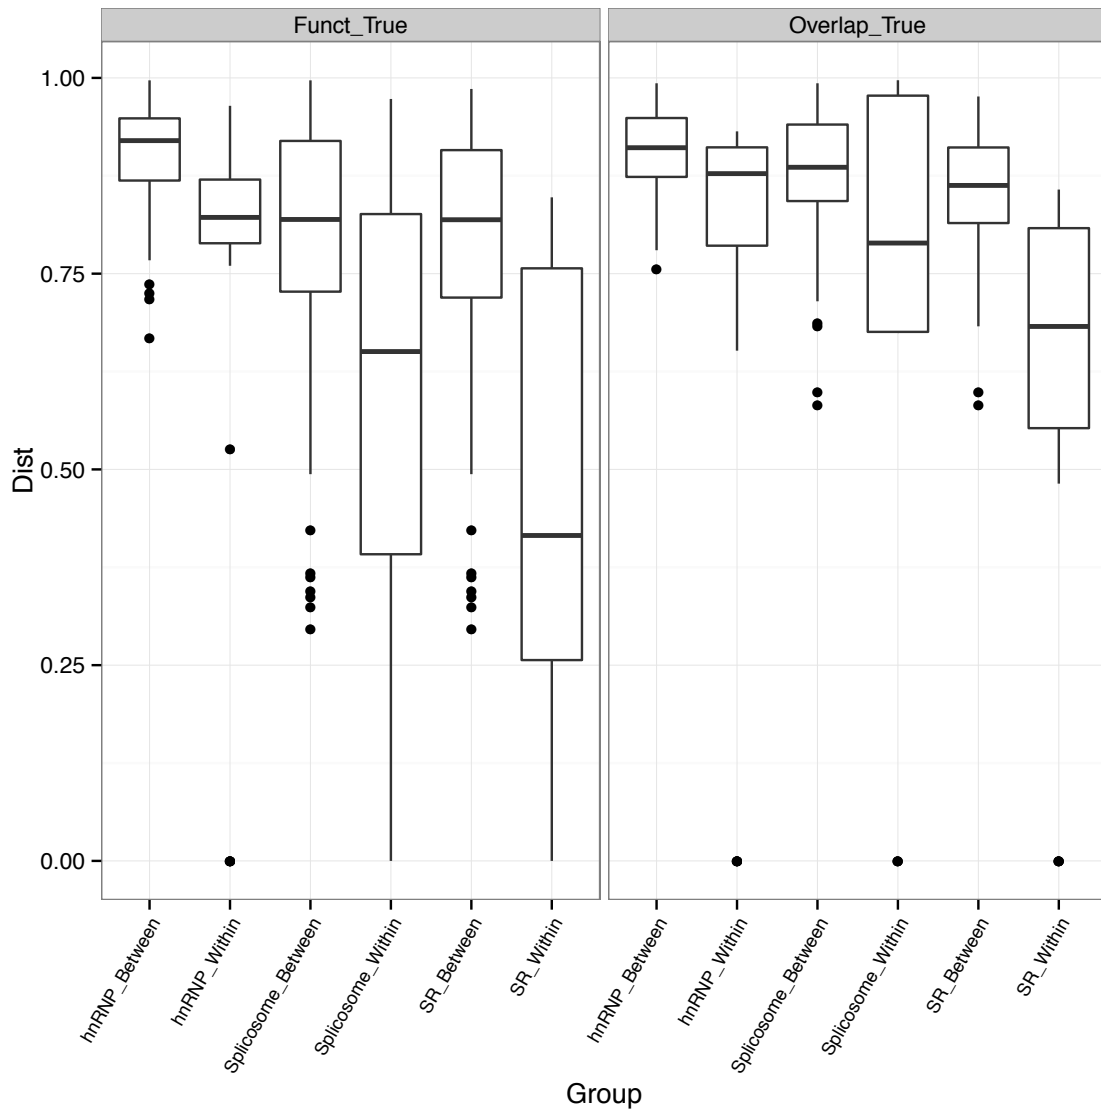

Supplemental Figure 11

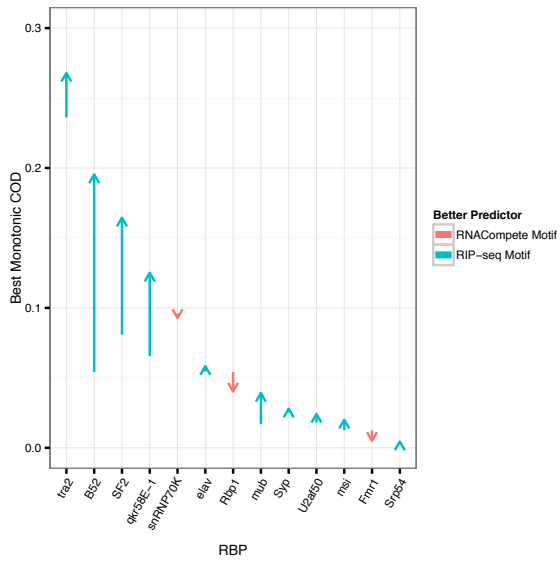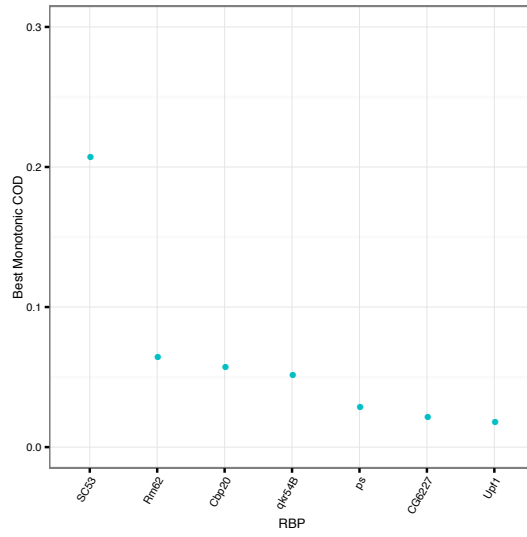

Supplemental Figure 12

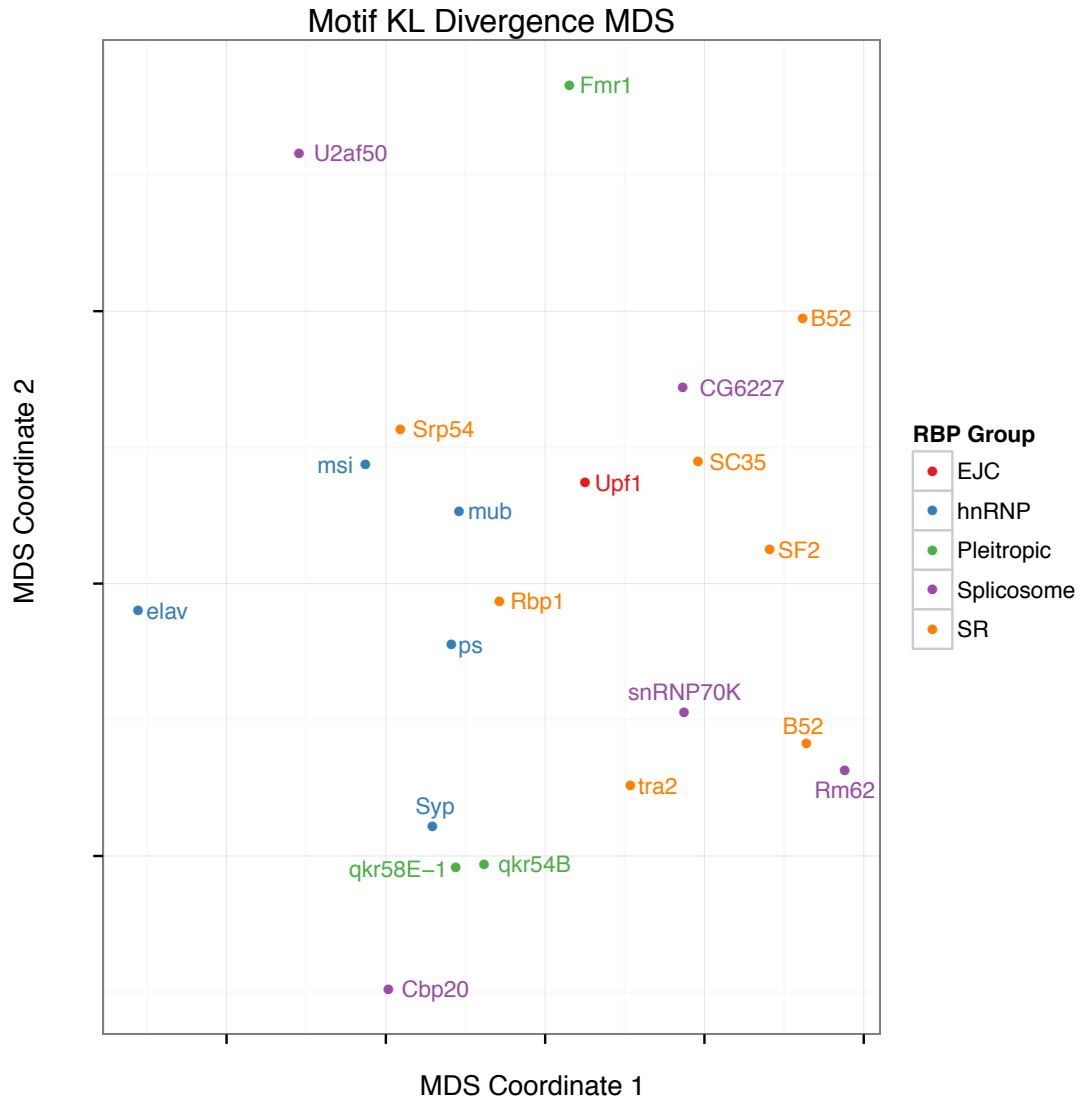

Supplemental Figure 13

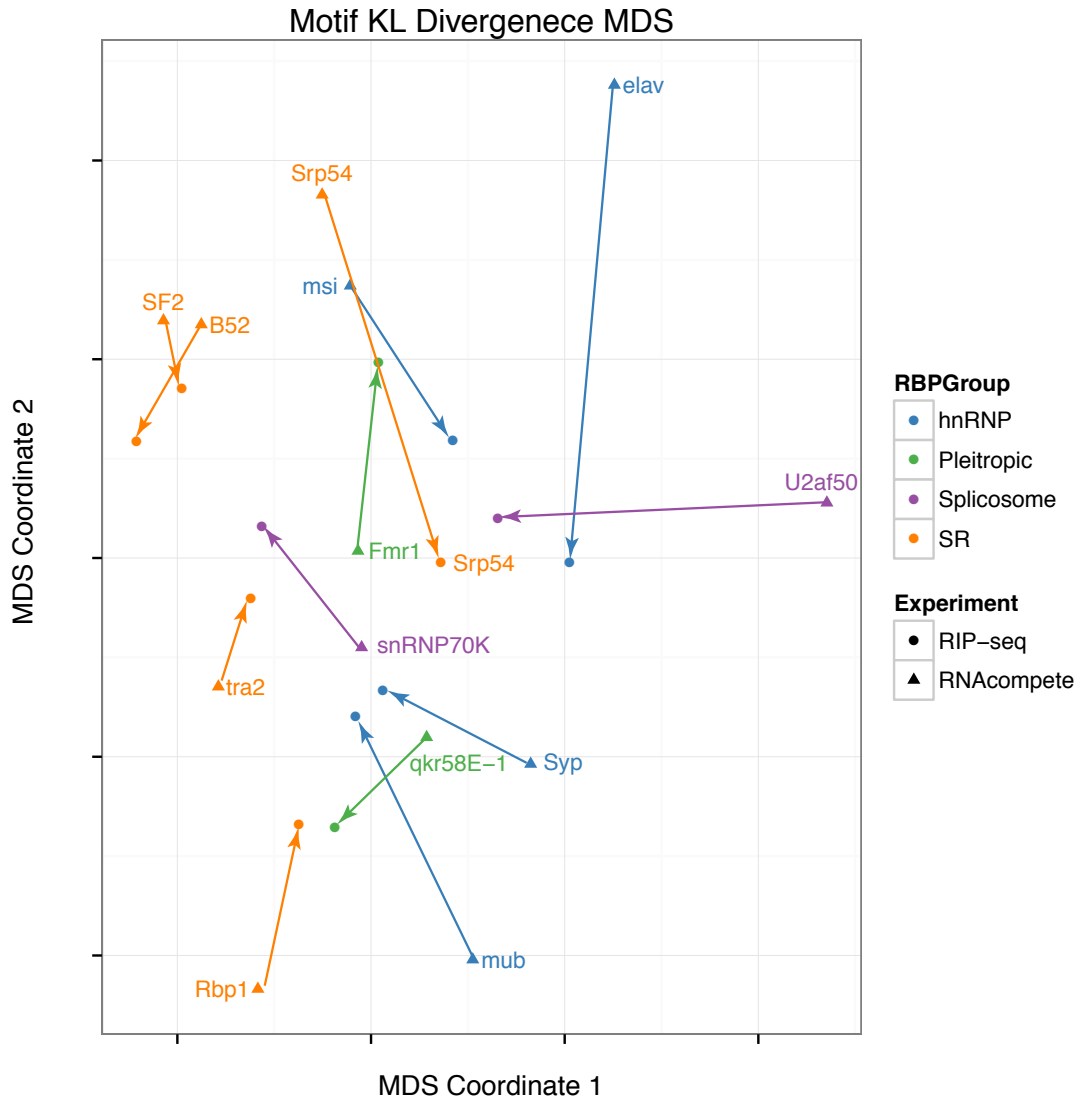

Supplemental Figure 14

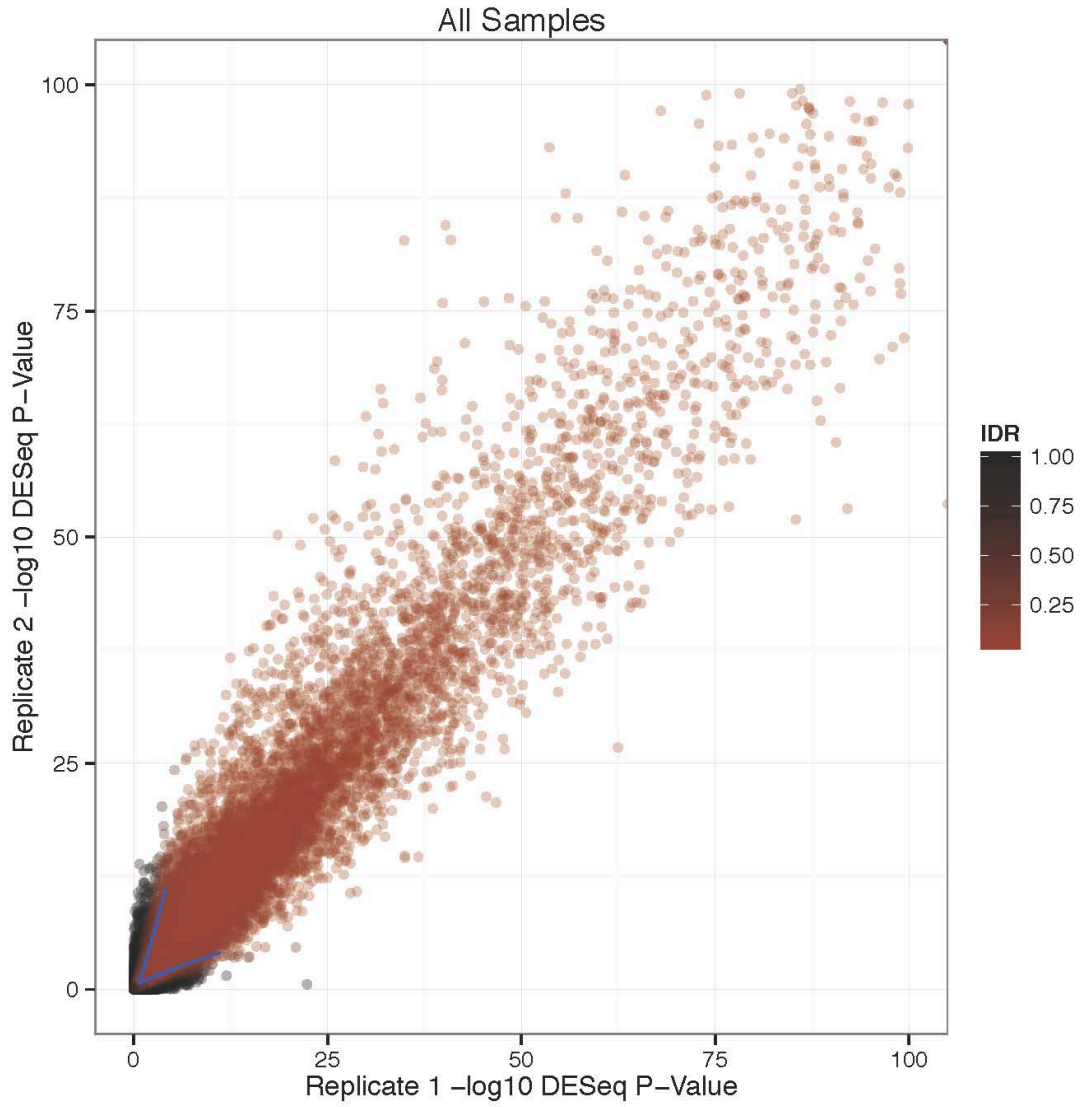

Supplemental Figure 15

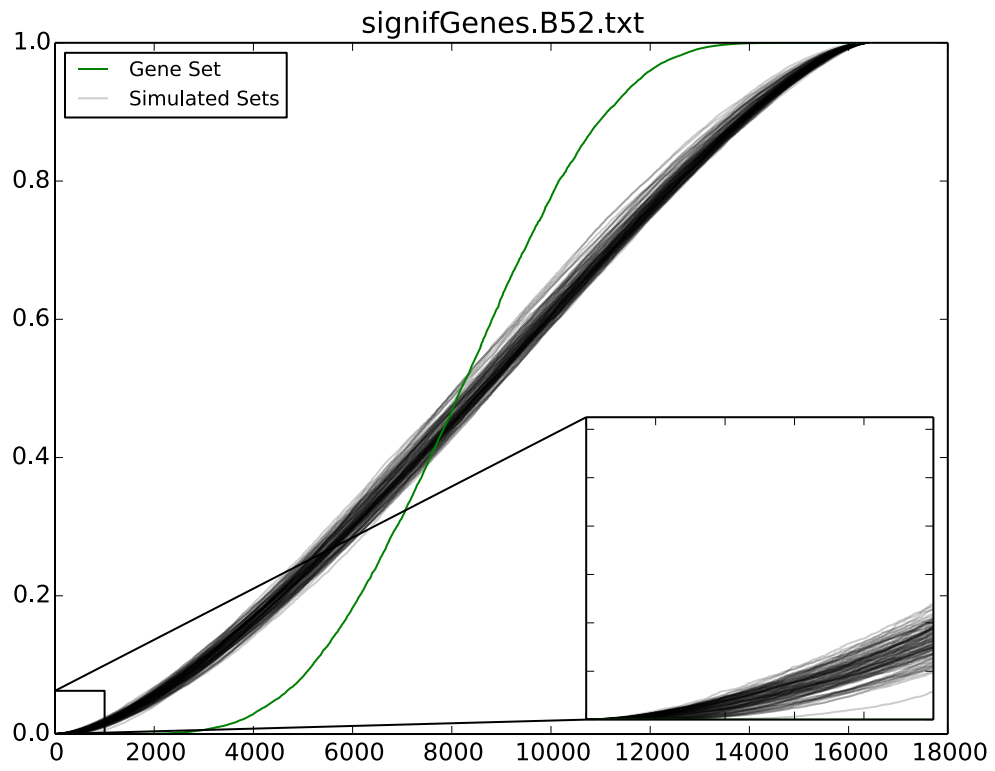

Supplement: supp_gr.182675.114_SuppFigures.pdf [file supp_gr.182675.114_SuppFigures.pdf]
