# Supplementary material for: Extensive cross-regulation of post-transcriptional regulatory networks in Drosophila
Source: Genome Res. 2015 Nov;25(11):1692–702. doi: 10.1101/gr.182675.114 (PMC4617965; doi:10.1101/gr.182675.114)
Supplement: Supplemental Material [file supp_gr.182675.114_SuppTable_1_-_Description_of_Supplementary_Files.xlsx]

## Sheet: Sheet1
Supp. Table	Name	Description	Notes
1	Description of Supplementary Files	This table provides a description of all Supplementary Material
2	RBP Annotation	Literature review and primary class designation of RBPs from this study as well as total number of identified targets from each RBP.
3	Processed Data	Raw data table continaing each RBP-gene interaction with DESeq adjusted p-value less than 1 in both replicates and a positive fold change
4	Mean FC Matrix	Matrix containing the average fold change across two replicates for all RBP-RNA combinations with FC > 1.5 and IDR < 0.1
5	Spliced Gene Enrichment	Hypergeomectric P-values for the overlap between the set of expressed spliced genes and the targets for each RBP.
6	All RBP Pairwise Transcript Overlaps	All pairwise overlaps between any two RBPs in this study including significance determined by hypergeometric p-value
7	HOT RNA Gene Names	List of those RNAs targeted by half or more of the RBPs in this study (HOT RNAs)
8	Number of RNAs Bound by number of RBPs	Summary table describing the overlap of all RBPs together including p-vallues of interest under a random overlapping sets model
9	GO Term Enrichments	GO term enrichment of gene sets described throughout the paper
10	Protein-RNA Interaction Overlap with P-value	Summary of overlap between MS and RIP-seq data
11	RIP-protein and DPiM interactions	Summary of annotated DPiM and RIP-seq derived protein-protein interactions
12	hnRNP characteristics	Overview of characteristics specific to hnRNP and quaking-related RBPs
13	Processed Introns Data	Raw Data table containing DESeq results for differentially bound introns analysis
Supp. Figure
1	Number of differentially captured RNAs	Number of differentially captured RNAs for each possible number of RBPs from the study. For number of RBPs that produce more than 5000 possible combinations a random set of 5000 were choosen
2	Expression of Target RNAs	Stacked bar plot across quantiles of non-zero expression loci of RBP-gene interactions grouped by a) target/non-target/HOT RNA and b) each RBPs individual hits.
3	Validation of Protein-Protein Interactions by co-Immunoprecipitation of RBPs	Five pairs of affinity-tagged RBPs, SC35:qkr58E-2, SC35:qkr58E-3, qkr58E-1:lark, U2af50:Upf1, and U2af50:elav were co-expressed in S2R+ cells and immunoprecipitated using the TAP-tag on the first protein in each pair, with prosbeta3-TAP:pros28.1-FLAG-HA as an additional, positive control pair. An “Empty Vector” negative control was used for each pair. The expression and purification was assayed b…
4	hnRNP Protein-RNA Interaction Clique	Plot as in Figure 4a for the tightly connected RBP-Protein and RBP-RNA interactions between Syp, qkr54B and qkr58E-1
5	Reported UTR extension genes	Browser from seven loci with reported 3' UTR extensions in literature
6	Expression acorss Gene Body	Average expression across gene body (from 5' to 3') for single isoform genes with reads covering at least 25% of bins across gene body in all samples.
7	RIP Discovered Motifs and previously discovered RNACompete Motifs	Both RIP-seq (top row) and in vitro (bottom row, where applicable) discovered motifs for the RBPs in this study
8	RBP Construct	The expression plasmid used for transfection into S2R+ cells
9	RBP MDS Plots	MDS plots using either raw gene target overlap or cosine distance between biological process GO term enrichment to determine pair-wise distances
10	Within versus between RBP class distances	Boxplots of cosine/jaccard distances within RBP classes and between RBP classes for three major classes of RBPs from this study
11	Motif gene binding prediction	Prediction performance as measured by the best monotonic transformation of motif match score to true binding strength as measured by IDR value for in vitro discovered as well as RIP-seq discovered.
12	RIP Motif MDS	MDS plot representing KL-distance (minimum over all overlaps of 4 or more bps) between discovered motifs
13	RIP versus RNAComplete Motifs MDS	MDS plot with both RIP-seq and in vitro discovered motifs
14	Replicate DESeq P-Values and IDR values	Negative log10 DESeq adjusted p-values for all samples together as well as the IDR cutoff line of 0.1
15	Random motif distribution matches null	Black lines represent random genes sets of the same size as the B52 interacting gene set (shown in green)
