# Supplementary material for: Extensive cross-regulation of post-transcriptional regulatory networks in Drosophila
Source: Genome Res. 2015 Nov;25(11):1692–702. doi: 10.1101/gr.182675.114 (PMC4617965; doi:10.1101/gr.182675.114)
Supplement: Supplemental Material [file supp_gr.182675.114_SuppTable_2_-_RBP_Annotation.xlsx]

## Sheet: Sheet1
Protein	Class	RNA Binding Domain(s)	Notes	Number of Identified Targets
tra2	SR-related	1 RRM, 2 RS domains	splicing, sex determination,	1126
Rm62	Spliceosome	DEAD-Box Domain	RNAi, splicing, interacts with Fmr1, AGO2 and dcr-1, neurogenesis	1559
B52	SR Protein	2 RRMs, 1 RS Domain	splicing	2384
Cbp20	Spliceosome	1 RRM	Binds to 7mG caps	601
Upf1	NMD, EJC	DEAD-Box Domain, Zinc-binding domains	helicase, NMD	2077
Rbp1	SR protein	1 RRM	splicing	1751
CG17838/Syp	hnRNP	3 RRMs	neurogenesis, R/Q splicing domain	1726
qkr58E-1	Other	1 KH domain	neurogenesis	1724
elav	hnRNP	3 RRMs	neurogenesis	1775
ps	hnRNP	3 KH Domains	splicing	1781
Srp54	SR protein	2 RRMs	splicing	1905
qkr54B	Other	1 KH Domain	poly(A) and poly(U) binding in vitro	1429
msi	hnRNP	2 RRMs	translation repressor	1034
SC35	SR protein	1 RRM, 1 RS Domain	splicing	1272
Fmr1	Other	2 KH Domains	self-binding, protein binding, synapse organization, long-term memory	880
CG6227	Spliceosome	DEAD-Box Domain	splicing, Prp5 Ortholog	639
SF2	SR protein	2 RRMs, 1 RS Domain	splicing	1538
mub	hnRNP	3 KH Domains	splicing	1104
snRNP70K	Spliceosome	1RRM, 1 RS Domain	splicing, component of U1 snRNP, interacts with SMN complex	642
U2af50	Spliceosome	3 RRMs, 1 RS Domain	splicing, part of U2AF heterodimer (with U2AF38)	1866
