# Supplementary material for: Extensive cross-regulation of post-transcriptional regulatory networks in Drosophila
Source: Genome Res. 2015 Nov;25(11):1692–702. doi: 10.1101/gr.182675.114 (PMC4617965; doi:10.1101/gr.182675.114)
Supplement: Supplemental Material [file supp_gr.182675.114_SuppTable_3_-_Processed_Data.xlsx]

## Sheet: output_table.csv
RBP	gene	IDR	nlpadj1	nlpadj2	FC1	FC2	expr1	expr1empty	expr1samp	expr2	expr2empty	expr2samp	globalIDR
B52	26-29-p	0.0245767	3.66276	3.63352	1.83119	1.8432	102.648	97.2585	178.099	102.726	97.2585	179.267	0.0100242
B52	312	0.247519	0.252224	0.221411	1.10835	1.11761	65.3936	64.9246	71.9593	65.4337	64.9246	72.5605	0.0668923
B52	4EHP	0.657963	0.225847	0.550156	1.15054	1.27941	312.7	309.593	356.198	315.36	309.593	396.095	0.145824
B52	A16	0.00591706	12.7148	12.5828	2.62831	2.61587	176.539	159.252	418.563	176.407	159.252	416.583	0.00275674
B52	ABCB7	0.0112356	7.33059	7.43993	2.08893	2.13024	148.719	138.653	289.636	149.101	138.653	295.364	0.00496915
B52	ACC	0.0339632	2.62617	2.76438	1.48862	1.48055	1543.18	1494.49	2224.74	1542.37	1494.49	2212.67	0.0132923
B52	AGO2	0.00189891	29.0712	32.7185	3.08907	3.17332	2484.28	2180.59	6735.99	2496.53	2180.59	6919.71	0.000945461
B52	AIF	0.0217537	4.00203	4.28433	1.67462	1.69111	403.004	385.659	645.835	403.428	385.659	652.191	0.00901396
B52	ALiX	0.0208067	5.1911	4.17593	1.71083	1.6185	462.936	441.991	756.172	460.216	441.991	715.362	0.00868
B52	AMPdeam	0.00879506	8.69398	9.60648	2.28313	2.37257	153.107	141.042	322.018	153.948	141.042	334.632	0.00399981
B52	AP-1-2beta	0.0575474	1.86125	1.52897	1.31494	1.28533	683.519	669.463	880.302	682.198	669.463	860.483	0.0207686
B52	AP-1gamma	0.989784	0.492366	0.0996187	1.13963	1.04049	531.62	526.717	600.26	528.139	526.717	548.045	0.245903
B52	AP-1mu	0.0256043	4.22407	3.43185	1.70193	1.6152	291.006	277.997	473.132	289.399	277.997	449.022	0.0103573
B52	AP-2alpha	0.19393	0.360069	0.418638	1.17117	1.17512	696.525	688.667	806.544	696.707	688.667	809.263	0.0550681
B52	APC4	0.0439452	2.31499	3.38467	1.96304	2.2936	34.4594	32.3805	63.564	35.173	32.3805	74.2678	0.0165698
B52	APP-BP1	0.00455228	14.9337	18.9037	3.34455	3.79944	83.135	71.8972	240.464	85.3153	71.8972	273.169	0.00215758
B52	ASPP	0.266513	0.442884	0.275416	3.10548	2.6525	1.10101	0.965488	2.9983	1.07185	0.965488	2.56096	0.0709967
B52	ATP7	0.0749555	1.25642	1.12513	1.36497	1.34523	187.205	182.758	249.459	186.964	182.758	245.852	0.0258171
B52	ATPsyn-b	0.369578	0.363263	0.198638	1.19967	1.13182	214.76	211.938	254.256	213.801	211.938	239.877	0.0921746
B52	ATPsyn-d	0.000571434	77.642	68.336	6.15654	5.45328	376.952	280.519	1727.02	363.8	280.519	1529.75	0.000308686
B52	ATPsyn-gamma	0.0228914	5.46002	3.99156	1.87798	1.70354	1514.92	1431.15	2687.68	1498.28	1431.15	2438.03	0.00941329
B52	Aac11	0.000357526	93.7872	108.612	6.78285	7.1735	657.536	474.576	3218.98	669.896	474.576	3404.37	0.000200757
B52	Aatf	0.000242031	126.091	150.577	12.4218	13.6083	256.462	145.597	1808.58	267.979	145.597	1981.33	0.000143829
B52	Aats-ala	0.0143302	6.29631	5.83224	1.78851	1.73132	1085.2	1031	1843.96	1081.27	1031	1784.99	0.00617871
B52	Aats-ala-m	0.672368	2.06098	0.600459	1.61871	1.30169	101.063	97.0592	157.111	99.0113	97.0592	126.341	0.148268
B52	Aats-arg	0.084774	1.17482	1.69094	1.33644	1.42571	186.717	182.621	244.062	187.804	182.621	260.364	0.0286164
B52	Aats-asn	0.0161993	5.87592	5.19403	1.81123	1.739	493.116	467.816	847.32	490.863	467.816	813.532	0.00689471
B52	Aats-asp	0.155797	1.06203	0.640038	1.31397	1.22943	330.34	323.568	425.159	328.517	323.568	397.802	0.0463278
B52	Aats-cys	0.0161849	6.14833	5.21522	1.81115	1.74444	257.91	244.679	443.149	256.822	244.679	426.827	0.0068854
B52	Aats-gln	0.00516061	16.6141	13.6347	2.64016	2.43356	271.619	244.847	646.434	268.247	244.847	595.85	0.00242211
B52	Aats-glupro	0.00672708	10.9213	12.0991	2.10177	2.14383	1116.04	1039.68	2185.16	1118.96	1039.68	2228.89	0.0031007
B52	Aats-gly	0.051315	2.67716	1.88195	1.53676	1.43006	301.11	290.707	446.747	299.042	290.707	415.729	0.0188249
B52	Aats-his	0.0329309	4.01011	2.86879	1.58818	1.48356	412.002	396.457	629.644	409.237	396.457	588.167	0.0129479
B52	Aats-ile	0.166728	0.723589	0.489981	1.23323	1.1805	571.342	562.594	693.807	569.364	562.594	664.142	0.048908
B52	Aats-leu	0.0381904	2.32623	2.69977	1.52273	1.58305	196.43	189.815	289.036	197.193	189.815	300.486	0.0147365
B52	Aats-lys	0.0348478	3.9111	2.76037	1.5626	1.45372	696.367	671.192	1048.81	691.495	671.192	975.726	0.013611
B52	Aats-ser	0.472925	1.74564	0.614278	1.55942	1.29764	82.5688	79.6001	124.13	81.1796	79.6001	103.292	0.112572
B52	Aats-thr	0.0012939	40.5477	40.2668	3.93633	3.79658	671.083	561.221	2209.15	665.854	561.221	2130.72	0.000653523
B52	Aats-tyr	0.0109887	7.67991	7.45107	2.27169	2.26372	174.674	161.022	365.793	174.588	161.022	364.51	0.00487432
B52	Aats-val	0.0122232	11.569	7.67849	2.19208	1.89797	589.415	546.022	1196.92	578.71	546.022	1036.34	0.00536921
B52	Abl	0.0220222	4.31722	3.92434	1.64801	1.59312	1836.83	1760.76	2901.76	1830.38	1760.76	2805.1	0.00910968
B52	Abp1	0.00479886	15.7883	14.4457	2.95713	2.78394	228.785	202.379	598.461	226.448	202.379	563.411	0.00227327
B52	Ac76E	0.356056	1.21551	0.511418	1.30972	1.17306	112.154	109.885	143.919	111.153	109.885	128.902	0.0894478
B52	Ac78C	0.194752	1.30688	0.67207	3.39021	2.54009	3.89624	3.36072	11.3936	3.70577	3.36072	8.53653	0.0552561
B52	Acf1	0.00352732	18.0361	21.0228	3.26682	3.4336	262.436	227.982	744.779	264.97	227.982	782.8	0.0017129
B52	Ack	0.112134	0.728188	0.726899	1.28896	1.2776	266.969	261.923	337.609	266.77	261.923	334.632	0.0357117
B52	Ack-like	0.0303091	2.98475	3.00767	1.46439	1.4685	752.732	730.127	1069.19	752.932	730.127	1072.19	0.0120179
B52	Acn	0.000280258	114.084	124.114	8.34437	8.30819	755.028	506.858	4229.41	753.805	506.858	4211.07	0.000162976
B52	Acox57D-d	1	1.38848	0.0159652	2.79528	1.19377	7.20606	6.4358	17.9898	6.51893	6.4358	7.68288	0.33652
B52	Acox57D-p	0.093196	2.9337	1.54983	1.74371	1.50792	77.2433	73.5945	128.327	76.0865	73.5945	110.975	0.0308762
B52	Actn	0.00778614	11.691	9.76772	2.52111	2.35177	168.713	153.179	386.181	166.983	153.179	360.242	0.00355605
B52	Ada2b	0.89989	0.0203448	0.0574918	1.03031	1.04653	435.646	434.768	447.947	436.116	434.768	454.997	0.197418
B52	Adam	0.00204792	27.3635	34.6791	3.32097	3.61137	690.576	598.04	1986.08	702.154	598.04	2159.74	0.00102459
B52	Adgf-C	0.119611	0.913791	1.45873	2.67549	3.57068	3.98666	3.5861	9.59457	4.20068	3.5861	12.8048	0.0375755
B52	AdipoR	0.0254615	3.7411	3.4255	1.58267	1.54709	505.001	486.117	769.365	503.847	486.117	752.069	0.0103077
B52	Adk3	0.0630232	1.38886	1.614	1.62322	1.72767	41.1709	39.5286	64.1637	41.4461	39.5286	68.2923	0.0223975
B52	Ahcy89E	0.0368414	3.51778	2.54804	8.12296	6.67126	2.83085	1.9194	15.5912	2.64509	1.9194	12.8048	0.0142831
B52	Ak6	0.85118	0.600446	2.36985	1.63071	2.55951	14.9445	14.3414	23.3868	15.8325	14.3414	36.7071	0.184395
B52	Akap200	0.00388571	16.6927	20.174	3.3691	3.57113	1599.34	1381.19	4653.37	1617.94	1381.19	4932.41	0.0018773
B52	Alas	0.014084	5.86505	7.30674	1.94559	2.12261	150.061	141.162	274.645	151.727	141.162	299.632	0.0060767
B52	Aldh-III	0.0048044	14.519	15.2598	2.69025	2.79643	131.45	118.138	317.82	132.286	118.138	330.364	0.0022767
B52	Alr	0.200082	2.35901	1.03159	1.64628	1.39713	98.786	94.7056	155.912	97.213	94.7056	132.316	0.0562905
B52	Amph	0.415627	0.129352	0.187179	1.15155	1.18557	58.9124	58.3232	67.162	59.0447	58.3232	69.1459	0.101706
B52	Amun	0.00649555	11.1675	13.1978	2.54355	2.65078	910.321	825.385	2099.41	916.221	825.385	2187.91	0.00300636
B52	Ance-4	0.999856	0.149815	1.19043	1.30969	2.20342	10.281	10.073	13.1925	10.8811	10.073	22.195	0.287138
B52	Ant2	0.176506	1.02178	0.590458	1.47244	1.33848	34.8669	33.8023	49.7718	34.565	33.8023	45.2436	0.0510149
B52	AnxB10	0.000528412	78.6476	73.0742	7.44587	6.58653	785.86	549.659	4092.68	754.371	549.659	3620.34	0.000287667
B52	Aos1	0.00275629	21.9745	24.3087	3.4235	3.61959	146.288	125.94	431.156	147.934	125.94	455.851	0.00135164
B52	Apc	0.708493	0.220145	0.0895037	1.1378	1.07957	1132.36	1122.06	1276.68	1128.01	1122.06	1211.33	0.154631
B52	Apc2	0.0624547	1.67639	1.39296	1.49341	1.4623	78.3869	75.8906	113.336	78.2295	75.8906	110.975	0.0222351
B52	ApepP	0.0176034	7.45558	5.27885	1.99467	1.80621	216.703	203.227	405.371	214.15	203.227	367.071	0.0074427
B52	Aph-4	0.072586	1.24678	1.58304	3.46685	4.23023	2.81982	2.42158	8.39525	2.94306	2.42158	10.2438	0.0251237
B52	Apoltp	0.018049	5.43061	8.4203	2.06129	2.34635	475.657	444.227	915.682	484.099	444.227	1042.31	0.00760945
B52	Appl	0.0340982	4.84077	3.09787	3.11848	2.60659	23.9201	20.9599	65.363	23.2048	20.9599	54.6338	0.0133424
B52	Aps	0.0627602	1.7326	2.68352	1.55424	1.70866	1127.82	1087.64	1690.44	1139.02	1087.64	1858.4	0.0223239
B52	Arc1	0.0804308	1.58163	1.13603	1.65977	1.52043	6076.05	5820.06	9659.93	6021.98	5820.06	8848.97	0.0274269
B52	ArfGAP1	0.178064	0.532941	0.400157	1.20865	1.17798	186.629	184.068	222.474	186.252	184.068	216.828	0.0514124
B52	ArfGAP3	0.147949	0.556246	0.48525	1.18271	1.16598	721.041	712.364	842.523	720.247	712.364	830.605	0.0444544
B52	Arfip	0.0803674	3.74369	1.91863	1.62266	1.4111	183.98	176.647	286.638	181.488	176.647	249.267	0.0274088
B52	Ark	0.107628	1.08346	1.7667	1.37424	1.4898	174.426	170.18	233.868	175.737	170.18	253.535	0.0345757
B52	Arp1	0.106698	2.2512	1.22784	1.46712	1.32274	252.877	245.24	359.796	250.516	245.24	324.388	0.0343151
B52	Arp3	0.386571	0.187907	0.12023	1.08542	1.06324	1528.5	1519.85	1649.67	1526.25	1519.85	1615.97	0.095708
B52	Arp5	0.00245433	24.6352	25.2457	4.39081	4.53242	70.6615	57.6332	253.057	71.2055	57.6332	261.218	0.00121359
B52	Arp6	0.987576	0.12178	0.52863	1.04578	1.20037	127.686	127.297	133.125	128.998	127.297	152.804	0.243024
B52	Arpc3B	0.821236	1.40866	0.38549	2.38263	1.61515	11.5449	10.5706	25.1857	11.0041	10.5706	17.0731	0.178003
B52	Arpc4	0.0115609	6.88785	7.68351	2.13565	2.19653	189.381	176.053	375.987	190.096	176.053	386.705	0.00510238
B52	Arpc5	0.0309524	3.14647	2.82982	1.67557	1.63576	176.156	168.564	282.44	175.709	168.564	275.73	0.0122533
B52	Arr2	0.492587	0.421115	1.02704	2.56356	4.17072	1.8081	1.63742	4.19762	1.98354	1.63742	6.82923	0.11599
B52	Ars2	0.000411177	86.2177	98.6798	6.57516	6.88823	650.385	474.153	3117.64	660.282	474.153	3266.08	0.000228259
B52	Art1	0.0482257	2.12567	1.81369	1.36694	1.33965	536.608	523.795	715.995	535.656	523.795	701.703	0.0179116
B52	Art3	0.00357962	18.618	18.7182	3.13293	3.15031	161.562	141.449	443.149	161.726	141.449	445.607	0.00173799
B52	Art7	0.00514321	17.495	13.8244	4.43159	3.88498	58.8601	47.9015	212.28	57.1145	47.9015	186.096	0.00241213
B52	Art8	1	0.00565785	0.263487	1.23963	1.76469	5.89762	5.80489	7.19593	6.10082	5.80489	10.2438	0.326673
B52	Asap	0.0261942	3.61314	3.33393	1.65655	1.60805	429.981	411.95	682.414	428.649	411.95	662.435	0.0105853
B52	Asciz	0.188117	0.618022	1.04899	1.35657	1.51066	56.1163	54.8134	74.3579	56.6794	54.8134	82.8044	0.0537808
B52	Asph	0.00718721	10.7314	10.7548	4.42634	4.58266	25.6289	20.8632	92.3477	25.8463	20.8632	95.6092	0.0033014
B52	Atac1	0.0161256	5.24064	6.47725	2.7373	3.06709	37.8887	33.9559	92.9474	38.6352	33.9559	104.146	0.00686426
B52	Atac2	1	3.44923	0.209499	2.49957	1.33049	30.3473	27.5892	68.961	28.197	27.5892	36.7071	0.310368
B52	Ate1	0.0101671	8.63605	7.85554	2.1997	2.12897	193.136	178.833	393.377	192.292	178.833	380.729	0.00454159
B52	Atg10	0.024765	4.31616	7.02227	2.83968	3.62064	27.2632	24.2848	68.961	28.5275	24.2848	87.9263	0.0100891
B52	Atg14	0.0324658	4.53584	3.06505	1.74369	1.58749	217.294	207.03	360.996	215.138	207.03	328.657	0.0127633
B52	Atg16	0.0358308	2.7242	3.86239	1.47376	1.62348	259.821	251.866	371.19	262.335	251.866	408.9	0.0139435
B52	Atg2	0.272135	0.962871	0.477445	1.26868	1.17086	707.264	694.818	881.501	702.732	694.818	813.532	0.0721444
B52	Atg3	0.00398406	17.1608	17.0943	3.15175	3.192	119.873	104.835	330.413	120.155	104.835	334.632	0.00191377
B52	Atg4a	0.0207704	6.63831	4.62378	2.20215	1.97077	100.593	93.1289	205.084	99.156	93.1289	183.535	0.00866509
B52	Atu	0.00475305	14.7917	15.177	2.71221	2.73625	201.255	180.636	489.923	201.545	180.636	494.265	0.0022521
B52	Atx2	0.0118987	9.02876	7.05241	1.94035	1.78849	998.73	939.813	1823.57	989.215	939.813	1680.84	0.00524564
B52	Aven	0.0483377	7.09896	3.50685	5.07957	3.49891	13.9649	10.979	55.7684	12.808	10.979	38.4144	0.0179363
B52	Axn	0.206841	0.459486	0.333582	1.1627	1.1314	833.625	824.68	958.857	831.904	824.68	933.043	0.0578341
B52	Axs	0.0225599	3.86516	4.67472	2.65309	3.1024	28.1045	25.3146	67.162	28.8627	25.3146	78.5361	0.00930115
B52	B4	0.975148	0.16929	0.0406357	1.09413	1.04471	948.049	942.137	1030.82	944.946	942.137	984.262	0.230394
B52	BBS8	0.0613286	1.47157	1.44338	1.8434	1.84473	34.7028	32.8555	60.5657	34.7057	32.8555	60.6094	0.0219052
B52	BCAS2	0.054071	2.19085	1.67743	1.64194	1.55508	93.3071	89.4778	146.917	92.789	89.4778	139.145	0.0196865
B52	BEAF-32	0.0438291	2.3854	3.58524	1.47666	1.62802	295.393	286.295	422.761	298.282	286.295	466.095	0.0165328
B52	BM-40-SPARC	0.00634587	14.3561	11.6497	2.38488	2.17234	2599.08	2379.4	5674.59	2565.36	2379.4	5168.87	0.00294782
B52	BRWD3	0.0047589	14.6726	15.315	2.441	2.43637	786.512	717.577	1751.61	786.291	717.577	1748.28	0.00225495
B52	BTBD9	0.0206034	5.08497	4.19598	2.31952	2.19074	58.5041	53.7738	124.729	58.0425	53.7738	117.804	0.0085878
B52	Bacc	0.00469854	14.9654	15.2462	2.32135	2.29879	2209	2030.17	4712.73	2205.95	2030.17	4666.92	0.0022281
B52	Bap170	0.225206	1.22389	0.608193	1.25264	1.16116	460.495	452.867	567.279	457.733	452.867	525.85	0.0619722
B52	Bap55	0.0924358	1.17483	1.81585	1.42739	1.53515	157.277	152.92	218.276	158.375	152.92	234.755	0.0306612
B52	Bap60	0.0687168	4.10061	2.14226	1.77324	1.51905	200.917	191.068	338.808	197.679	191.068	290.242	0.0240311
B52	BicD	0.0780142	1.53457	2.54621	1.44183	1.56108	364.787	354.35	510.911	367.604	354.35	553.167	0.0267333
B52	Blm	0.238054	0.445965	0.746775	1.26652	1.34466	200.946	197.438	250.058	201.974	197.438	265.486	0.0646349
B52	Blos3	0.116857	1.38636	0.864184	2.17638	1.90241	16.937	15.7053	34.1807	16.6501	15.7053	29.8779	0.0368428
B52	BoYb	0.0671592	1.84089	1.36384	1.45282	1.38212	175.615	170.469	247.66	174.811	170.469	235.608	0.0235276
B52	Br140	0.192119	1.85832	0.872766	1.4703	1.28853	678.488	657.862	967.253	670.516	657.862	847.678	0.0546595
B52	Brd8	0.0018849	34.2663	29.7674	4.30691	3.90021	198.475	162.623	700.404	194.066	162.623	634.264	0.000939462
B52	Bre1	0.0278552	3.15972	3.68164	1.74139	1.78355	736.849	702.145	1222.71	738.823	702.145	1252.31	0.0111822
B52	Brms1	0.389206	1.39046	0.551209	1.38474	1.21631	167.003	162.827	225.472	165.175	162.827	198.048	0.0962549
B52	Bruce	0.0061011	11.8423	14.8813	2.48719	2.63425	1346.75	1225.27	3047.48	1358.76	1225.27	3227.66	0.00283373
B52	Bsg25A	0.12652	0.656382	0.600592	3.14391	3.13288	2.17999	1.90737	5.99661	2.17859	1.90737	5.97557	0.0393692
B52	Bsg25D	0.00266786	23.1309	23.6546	3.12505	3.1108	356.213	312.011	975.048	355.917	312.011	970.604	0.00131765
B52	BtbVII	0.110193	0.832866	0.711336	1.2402	1.21001	1567.61	1542.91	1913.52	1564.51	1542.91	1866.94	0.0352395
B52	BthD	0.00126963	39.4988	43.0305	4.693	4.75614	748.412	600.555	2818.41	750.94	600.555	2856.32	0.000643745
B52	Btk29A	0.0570046	2.10495	1.59801	1.4291	1.36272	363.416	353.309	504.914	361.852	353.309	481.46	0.020596
B52	Bub1	0.0171815	5.21646	5.00575	1.77721	1.75875	286.405	272.296	483.926	286.069	272.296	478.9	0.00728307
B52	BubR1	0.0263917	3.32176	3.62803	1.65551	1.68798	221.159	211.899	350.801	221.618	211.899	357.681	0.010671
B52	Buffy	0.324721	1.65432	0.67228	7.79911	4.75822	0.782179	0.538218	4.19762	0.673068	0.538218	2.56096	0.0833072
B52	Bx42	0.000656335	69.3912	62.3592	5.78436	5.23354	313.671	237.817	1375.62	304.938	237.817	1244.63	0.000349312
B52	C3G	0.0640019	1.48075	1.34392	1.35451	1.32692	562.393	549.408	744.179	561.383	549.408	729.02	0.022663
B52	CAHbeta	0.145623	0.604997	0.50081	1.66208	1.63177	10.9247	10.4629	17.3902	10.9036	10.4629	17.0731	0.0438802
B52	CAP	0.0256054	3.59427	4.87486	1.75734	1.90604	173.137	164.815	289.636	174.771	164.815	314.144	0.0103584
B52	CASK	0.00363218	19.0723	18.0905	2.79854	2.67517	496.735	443.552	1241.3	493.087	443.552	1186.58	0.00176472
B52	CCAP	0.428609	0.210882	0.379904	1.98636	2.8277	0.965224	0.90567	1.79898	1.01602	0.90567	2.56096	0.104172
B52	CD98hc	0.00634702	12.5334	11.6369	2.25388	2.18173	483.763	446.444	1006.23	481.615	446.444	974.018	0.00294904
B52	CDase	0.155477	0.471756	0.507605	1.16143	1.17176	401.319	397.046	461.139	401.592	397.046	465.241	0.0462209
B52	CG10011	0.0080349	10.1855	9.56748	2.12202	2.05677	563.414	524.203	1112.37	561.134	524.203	1078.16	0.0036708
B52	CG10041	0.480574	0.115965	0.0712822	1.65239	1.56818	2.27213	2.17743	3.59796	2.25991	2.17743	3.41461	0.113866
B52	CG10053	0.0793075	1.12152	1.39627	1.88117	2.15965	10.4624	9.88185	18.5895	10.6458	9.88185	21.3413	0.0271014
B52	CG10055	0.010961	7.42614	7.66626	2.30214	2.29098	390.383	359.201	826.932	390.116	359.201	822.922	0.00486417
B52	CG10063	0.00520638	14.23	13.7308	3.40846	3.42505	72.8928	62.8081	214.079	72.9622	62.8081	215.121	0.00243918
B52	CG10068	0.999959	0.0760109	0.654477	1.07777	1.33208	72.1462	71.7741	77.3562	73.3631	71.7741	95.6092	0.293808
B52	CG10077	0.025998	3.71995	3.34459	1.53111	1.48719	2125.32	2052.64	3142.82	2119.31	2052.64	3052.66	0.0105081
B52	CG10089	0.797541	0.0732734	0.0293976	1.24169	1.17841	2.94433	2.89764	3.59796	2.93211	2.89764	3.41461	0.172816
B52	CG10092	0.161685	0.61932	0.462647	1.42956	1.37582	30.6354	29.7825	42.5759	30.5287	29.7825	40.9754	0.047707
B52	CG10103	0.0164893	5.12965	5.61422	1.70652	1.77487	251.307	240.003	409.568	252.401	240.003	425.973	0.00702852
B52	CG10126	0.292946	0.403515	0.728428	1.71982	2.05654	9.13522	8.71692	14.9915	9.3309	8.71692	17.9267	0.0766833
B52	CG10137	0.0846503	1.36164	2.19773	1.6403	1.9603	30.876	29.612	48.5725	31.5077	29.612	58.0484	0.0285914
B52	CG10144	0.124084	1.47848	0.87722	1.51533	1.37947	95.3729	92.2052	139.721	94.5378	92.2052	127.194	0.0387028
B52	CG10151	0.0894021	0.946744	1.10505	1.62195	1.807	17.7121	17.0069	27.5844	17.9219	17.0069	30.7315	0.0298431
B52	CG10158	0.044045	2.03611	2.10712	1.57485	1.60832	90.9341	87.5779	137.922	91.1295	87.5779	140.853	0.0166015
B52	CG10184	0.0116104	10.1846	7.45146	2.80165	2.47742	86.0691	76.8399	215.278	84.4082	76.8399	190.365	0.00512456
B52	CG10186	0.0771165	2.35295	4.89731	3.09067	5.1094	6.85302	6.0147	18.5895	7.66249	6.0147	30.7315	0.0264588
B52	CG10188	0.112208	0.724086	0.736694	1.23414	1.24637	188.509	185.612	229.07	188.66	185.612	231.34	0.0357345
B52	CG10195	0.0789226	1.93716	3.6952	1.58553	1.96808	64.4474	62.0261	98.3443	66.0292	62.0261	122.072	0.0269822
B52	CG10209	0.0568018	1.54723	1.66227	1.57027	1.62271	53.5144	51.5544	80.9542	53.6946	51.5544	83.658	0.0205366
B52	CG10211	0.0533015	1.6551	1.77713	15.4177	17.0707	0.686509	0.350049	5.39695	0.725084	0.350049	5.97557	0.0194566
B52	CG10232	0.178271	0.739502	1.33442	1.57339	1.87984	22.159	21.3431	33.581	22.595	21.3431	40.1217	0.0514699
B52	CG10237	0.288367	0.561475	0.313104	1.54637	1.40086	13.2631	12.797	19.7888	13.139	12.797	17.9267	0.0757931
B52	CG1024	0.0247017	3.53475	4.20026	1.71847	1.81908	156.87	149.699	257.254	157.874	149.699	272.315	0.0100678
B52	CG10254	0.385953	0.48841	1.10623	1.28285	1.4088	183.359	179.965	230.869	184.87	179.965	253.535	0.0955831
B52	CG10264	0.0760171	1.41176	1.12926	3.38266	3.21028	3.69781	3.19094	10.7939	3.66114	3.19094	10.2438	0.0261298
B52	CG10265	0.965865	1.43637	0.300241	1.45198	1.16697	115.294	111.922	162.508	113.168	111.922	130.609	0.223789
B52	CG10274	0.104544	1.49393	0.95626	1.44485	1.33565	238.884	232.004	335.21	237.195	232.004	309.876	0.0337898
B52	CG10283	0.206085	0.752103	0.45001	1.96824	1.72425	8.43269	7.92137	15.5912	8.30384	7.92137	13.6585	0.0576971
B52	CG10286	0.0314206	3.23972	2.78569	1.56625	1.52536	250.31	241.205	377.786	249.653	241.205	367.925	0.0124311
B52	CG10289	0.00970857	7.96723	9.26605	1.96491	2.05561	569.728	535.294	1051.8	572.965	535.294	1100.36	0.00436004
B52	CG10298	0.0459029	2.02133	2.6268	5.49839	6.70911	2.97712	2.29028	12.5929	3.16198	2.29028	15.3658	0.0171811
B52	CG10306	0.00414137	16.982	16.4306	2.57497	2.5015	544.516	492.775	1268.88	542.102	492.775	1232.68	0.00197894
B52	CG10307	0.0469691	2.09572	1.86438	4.37206	4.39334	2.85585	2.33168	10.1942	2.85915	2.33168	10.2438	0.0175402
B52	CG10321	0.00175871	33.905	31.6809	3.64948	3.41611	551.011	468.295	1709.03	543.725	468.295	1599.75	0.000877643
B52	CG10324	0.00130998	38.7089	42.5919	5.55662	5.82903	123.535	94.7522	526.502	125.256	94.7522	552.314	0.000664712
B52	CG10333	0.000673235	62.3365	65.0349	5.44283	5.45003	340.88	262.986	1431.39	341.006	262.986	1433.28	0.000356329
B52	CG10340	0.00352065	20.0212	18.3263	4.10705	3.91505	79.4892	65.8494	270.447	78.6463	65.8494	257.803	0.00170969
B52	CG10341	0.0881348	2.61448	1.46908	1.7904	1.56949	66.9901	63.6368	113.936	66.0529	63.6368	99.8774	0.0295336
B52	CG10343	0.03983	3.40101	2.40411	1.79056	1.63609	151.597	144.007	257.854	150.114	144.007	235.608	0.0152436
B52	CG10359	0.448484	0.199853	0.362322	1.47276	1.86361	3.78002	3.66452	5.39695	3.8755	3.66452	6.82923	0.108186
B52	CG10375	1	0.0390477	0.695369	1.13825	1.42093	69.1189	68.4877	77.9559	70.4096	68.4877	97.3165	0.317047
B52	CG10376	0.57752	0.363263	0.918357	1.12469	1.25008	318.802	316.174	355.599	321.445	316.174	395.242	0.131755
B52	CG10383	0.15251	0.485897	0.497674	1.17688	1.1888	172.191	170.184	200.287	172.327	170.184	202.316	0.045475
B52	CG10395	0.0223056	4.20146	6.01317	2.04877	2.45823	43.8421	40.9771	83.9525	44.9607	40.9771	100.731	0.0091955
B52	CG10407	0.996271	0.307091	1.88558	1.36163	2.28043	15.3345	14.9735	20.3885	16.2517	14.9735	34.1461	0.259215
B52	CG1041	0.0356222	2.58614	2.51304	2.09141	2.11114	33.8347	31.5398	65.9627	33.8761	31.5398	66.585	0.0138824
B52	CG10417	0.51396	0.311609	0.705994	1.17939	1.293	1054.27	1041.82	1228.7	1062.17	1041.82	1347.06	0.120241
B52	CG10433	0.233422	0.261499	0.262913	1.38404	1.39992	16.8857	16.4642	22.7871	16.9032	16.4642	23.0486	0.0636391
B52	CG10435	0.0192954	4.67438	4.51681	2.05378	1.98859	223.744	209.057	429.357	222.835	209.057	415.729	0.00806211
B52	CG10445	0.280415	0.248783	0.341956	1.16238	1.18806	423.436	418.901	486.924	424.153	418.901	497.68	0.0740049
B52	CG10462	0.0292864	3.10059	3.08325	1.64445	1.65002	172.667	165.555	272.246	172.729	165.555	273.169	0.0116356
B52	CG10463	0.00265515	25.7651	22.8186	4.46819	4.15554	94.8459	77.0345	344.205	93.2402	77.0345	320.12	0.00131152
B52	CG10469	0.124568	0.646783	0.759605	1.67003	1.82876	9.75289	9.33587	15.5912	9.85168	9.33587	17.0731	0.0388398
B52	CG10486	1	0.0499586	0.741539	1.21349	2.12613	6.51553	6.42409	7.79559	6.90638	6.42409	13.6585	0.313575
B52	CG10494	0.0180693	5.15211	7.50562	2.22029	2.65709	53.1539	49.155	109.138	54.5852	49.155	130.609	0.00761915
B52	CG10505	0.475612	0.573929	0.252194	2.17029	1.69925	5.95723	5.52608	11.9932	5.78369	5.52608	9.39019	0.11296
B52	CG10508	0.933909	1.85313	0.410045	2.20446	1.4768	14.987	13.8731	30.5827	14.314	13.8731	20.4877	0.208848
B52	CG10543	0.868261	0.06595	0.176798	1.06258	1.10596	984.356	980.266	1041.61	987.191	980.266	1084.14	0.188531
B52	CG10550	0.0220374	4.2872	3.92654	2.49199	2.45195	35.9815	32.7264	81.5538	35.8942	32.7264	80.2434	0.00911352
B52	CG10562	0.289451	0.275666	0.411762	4.41109	6.27945	0.333717	0.271888	1.19932	0.367583	0.271888	1.70731	0.0760119
B52	CG10565	0.000323973	102.206	109.441	7.59556	7.52183	657.654	456.798	3469.64	655.408	456.798	3435.95	0.000184553
B52	CG10566	0.273109	0.401993	0.254524	2.79085	2.64863	0.72156	0.644601	1.79898	0.715448	0.644601	1.70731	0.0723091
B52	CG10576	0.0383688	2.34683	2.40245	1.4224	1.41848	1322.9	1286.67	1830.16	1322.57	1286.67	1825.11	0.0147948
B52	CG10581	0.11863	0.876676	1.34344	1.70636	2.23215	27.2303	26.0056	44.3749	28.1418	26.0056	58.0484	0.0372833
B52	CG10584	0.995964	0.714991	0.12349	1.46412	1.15792	38.002	36.8614	53.9695	37.2495	36.8614	42.6827	0.258336
B52	CG10585	0.0382515	3.43583	2.47343	1.71323	1.59582	118.798	113.405	194.29	117.91	113.405	180.975	0.0147593
B52	CG10600	0.0191998	4.59441	4.62053	2.06332	2.02855	497.97	465.007	959.457	496.892	465.007	943.287	0.00803302
B52	CG10602	0.050239	1.76621	1.8664	1.33807	1.37639	213.088	208.391	278.842	213.62	208.391	286.828	0.018493
B52	CG10616	0.841551	0.153144	0.433095	1.10329	1.17618	485.971	482.647	532.499	488.316	482.647	567.679	0.182185
B52	CG10628	0.992446	0.50241	0.0975869	1.25281	1.08558	78.3616	77.0628	96.5454	77.5025	77.0628	83.658	0.25012
B52	CG10631	0.0113567	6.99095	8.75693	2.16512	2.30566	385.036	357.284	773.562	388.384	357.284	823.775	0.00501981
B52	CG10635	0.130694	1.2578	2.4686	1.3571	1.55101	286.815	280.146	380.185	290.437	280.146	434.51	0.0403352
B52	CG10638	0.00718746	10.3382	11.4288	2.01572	2.06869	1073.3	1005.23	2026.25	1076.85	1005.23	2079.5	0.00330204
B52	CG10660	0.551504	0.163487	0.322987	1.38473	1.577	11.104	10.8263	14.9915	11.2427	10.8263	17.0731	0.127015
B52	CG10688	0.00494163	16.0766	14.0471	3.36502	3.17326	113.672	98.1904	330.413	112.417	98.1904	311.583	0.00232689
B52	CG10694	0.262474	1.23227	0.577535	5.10827	3.35627	1.94404	1.52607	7.79559	1.7658	1.52607	5.12192	0.0701348
B52	CG10730	0.0802157	1.3224	1.05997	5.59962	5.0727	1.5392	1.17799	6.59627	1.49782	1.17799	5.97557	0.0273868
B52	CG10731	0.740642	0.0607803	0.131729	1.01153	1.07998	45.0895	45.0549	45.5742	45.2951	45.0549	48.6582	0.161081
B52	CG10732	0.006158	11.705	13.2176	2.73193	2.88618	124.381	111.506	304.628	125.528	111.506	321.827	0.00286664
B52	CG10737	0.0561952	3.49158	2.08495	1.72571	1.53828	116.94	111.543	192.491	115.546	111.543	171.584	0.0203317
B52	CG10738	0.0875103	5.00926	2.28044	2.80941	2.0949	25.1155	22.412	62.9644	24.0479	22.412	46.9509	0.0293503
B52	CG1074	0.8467	0.245352	0.766328	1.15177	1.32021	121.485	120.268	138.522	122.836	120.268	158.78	0.183504
B52	CG10754	0.0398516	3.89933	2.57321	1.96982	1.77497	60.9321	57.2318	112.736	60.1887	57.2318	101.585	0.0152566
B52	CG1077	0.162446	2.45796	1.13593	2.42821	1.87864	24.8832	22.72	55.1688	24.0508	22.72	42.6827	0.0478573
B52	CG10777	0.385388	0.202693	0.332806	1.06467	1.10751	609.222	606.607	645.835	610.955	606.607	671.825	0.0954453
B52	CG10799	0.968895	0.125817	0.475133	2.43346	5.19626	0.539945	0.492846	1.19932	0.630721	0.492846	2.56096	0.226112
B52	CG10802	0.00534935	13.1605	15.1231	2.88726	3.09882	118.782	105.508	304.628	120.27	105.508	326.949	0.00250243
B52	CG10863	0.0548135	1.83126	1.59039	1.61969	1.58519	67.8528	65.1609	105.54	67.7029	65.1609	103.292	0.0199274
B52	CG10864	0.100967	1.16629	0.848768	2.49699	2.26203	8.71597	7.92506	19.7888	8.59183	7.92506	17.9267	0.0329003
B52	CG10877	0.0645207	1.35449	1.44755	2.01438	2.11012	16.8445	15.7776	31.782	16.9452	15.7776	33.2925	0.0228037
B52	CG10880	0.986114	0.463236	0.0983035	1.23131	1.08463	89.5083	88.149	108.539	88.6464	88.149	95.6092	0.241284
B52	CG10904	0.393816	0.459486	1.03207	1.27871	1.51374	45.3788	44.551	56.9678	46.0768	44.551	67.4386	0.0971513
B52	CG10907	0.0402415	2.39989	3.33079	1.81193	2.02	57.9117	54.938	99.5437	58.6738	54.938	110.975	0.0153843
B52	CG1091	0.00226982	28.142	25.8978	3.70957	3.50462	211.083	178.787	663.225	208.64	178.787	626.582	0.0011245
B52	CG10914	0.0401925	2.70579	2.20374	1.95259	1.85922	49.3187	46.3737	90.5488	49.03	46.3737	86.219	0.0153674
B52	CG10915	0.00815096	12.861	9.67247	2.56257	2.26621	333.574	302.104	774.162	327.605	302.104	684.63	0.00372435
B52	CG10916	0.0346532	2.71331	2.55658	1.47977	1.47549	288.977	280.021	414.366	288.897	280.021	413.168	0.0135436
B52	CG10924	0.0158579	5.2936	6.38422	1.82739	1.92504	277.001	262.521	479.729	278.71	262.521	505.363	0.00676755
B52	CG10927	0.0056771	14.135	12.6327	4.52338	4.3025	36.507	29.5629	133.724	36.0717	29.5629	127.194	0.00265302
B52	CG10936	0.012681	6.56562	6.71759	3.5528	3.6907	21.9237	18.7352	66.5623	22.0959	18.7352	69.1459	0.0055438
B52	CG10948	0.0100234	7.85538	8.49812	2.8799	3.0908	59.9855	53.305	153.513	60.735	53.305	164.755	0.00448308
B52	CG10949	0.566828	0.0783301	0.135609	1.04667	1.07207	329.881	328.858	344.205	330.438	328.858	352.559	0.130074
B52	CG10958	0.015806	9.83764	6.36635	6.28859	4.85259	13.8006	10.2032	64.1637	12.8238	10.2032	49.5119	0.00675248
B52	CG10962	0.286322	0.183353	0.193719	1.19967	1.22315	37.4817	36.9893	44.3749	37.5396	36.9893	45.2436	0.0753312
B52	CG10973	0.0457559	2.01156	2.57342	1.68365	1.82332	60.7012	58.0552	97.7447	61.2417	58.0552	105.853	0.017136
B52	CG10979	0.113093	0.993763	0.736291	1.22231	1.18805	473.968	467.046	570.877	472.901	467.046	554.875	0.0359615
B52	CG10984	0.0259736	5.96963	3.92992	2.02726	1.79641	140.645	131.63	266.849	138.619	131.63	236.462	0.0104976
B52	CG11000	0.192149	0.830538	0.49761	2.09331	1.82642	9.52771	8.88044	18.5895	9.36971	8.88044	16.2194	0.0546671
B52	CG11030	0.00306468	21.5238	20.7382	3.07024	3.02068	245.386	215.626	662.025	244.674	215.626	651.338	0.0015039
B52	CG11037	0.26494	0.251619	0.328171	8.89239	12.6589	0.102917	0.0674353	0.599661	0.11985	0.0674353	0.853653	0.0706887
B52	CG1104	0.0113269	7.29787	7.38024	2.2976	2.32692	99.2501	91.3479	209.881	99.4287	91.3479	212.56	0.00500364
B52	CG1105	0.369931	0.535151	0.268623	1.17555	1.11004	102.7	101.512	119.332	102.256	101.512	112.682	0.0922254
B52	CG11050	0.0851	1.05512	0.979655	1.3726	1.34495	241.327	235.477	323.217	240.892	235.477	316.705	0.0287122
B52	CG11070	0.700852	0.0865083	0.0397759	1.09626	1.06698	226.262	224.819	246.461	225.823	224.819	239.877	0.153457
B52	CG1109	0.0282587	4.20122	3.20398	1.67727	1.58853	181.975	174.113	292.035	180.944	174.113	276.584	0.0113162
B52	CG11107	0.0239138	5.46169	3.90584	1.79265	1.64093	332.464	315.778	566.08	329.27	315.778	518.168	0.00977493
B52	CG11109	0.326481	0.16728	0.132878	1.19059	1.16831	52.537	51.8778	61.765	52.4599	51.8778	60.6094	0.0836283
B52	CG11122	0.00858924	10.0701	9.01199	2.17209	2.07243	417.005	386.782	840.125	414.436	386.782	801.581	0.00390449
B52	CG11123	0.422172	0.076361	0.0665858	1.03458	1.03458	449.075	448.042	463.538	449.075	448.042	463.534	0.102938
B52	CG1113	0.152046	0.611849	0.878209	4.86144	6.92056	0.620417	0.493401	2.39864	0.688149	0.493401	3.41461	0.0454112
B52	CG11134	0.0297097	3.0352	3.07269	2.35313	2.42954	25.282	23.19	54.5691	25.4001	23.19	56.3411	0.0117947
B52	CG11148	0.0886007	2.33258	5.11508	1.45734	1.78653	378.652	367.449	535.497	386.716	367.449	656.459	0.02963
B52	CG11158	0.885096	0.92226	0.248913	1.64566	1.3015	30.7861	29.5156	48.5725	30.1088	29.5156	38.4144	0.192859
B52	CG11168	0.535597	0.202693	0.101766	1.21548	1.15354	43.5382	42.9216	52.1705	43.361	42.9216	49.5119	0.12425
B52	CG11180	0.330163	0.696098	1.65515	1.34576	1.57546	505.552	494.161	665.024	513.119	494.161	778.532	0.0844015
B52	CG11190	0.00642219	12.7044	11.4381	2.42306	2.31509	261.205	238.572	578.073	259.488	238.572	552.314	0.00297734
B52	CG11241	0.707381	0.157919	0.372062	1.93936	2.76079	1.64285	1.54603	2.9983	1.72751	1.54603	4.26827	0.154361
B52	CG11248	0.0127871	6.50561	6.68326	2.24696	2.27631	109.266	100.879	226.672	109.463	100.879	229.633	0.00557833
B52	CG1126	1	0.013996	0.426085	2.46594	7.02082	0.266943	0.243178	0.599661	0.340786	0.243178	1.70731	0.325046
B52	CG11263	0.458352	0.597054	1.57	1.4524	1.78412	52.7408	51.1967	74.3579	53.873	51.1967	91.3409	0.109947
B52	CG11266	0.0262724	3.42948	4.44031	1.6339	1.74016	258.202	247.733	404.771	259.957	247.733	431.095	0.0106281
B52	CG11307	0.0875596	1.03782	1.35685	1.44061	1.5506	52.7033	51.1993	73.7583	53.0787	51.1993	79.3898	0.0293716
B52	CG11321	0.228768	2.44469	1.01741	3.2346	2.30233	4.26014	3.70778	11.9932	4.0297	3.70778	8.53653	0.0627474
B52	CG11334	0.0753676	5.56254	2.57148	1.99536	1.61902	125.945	118.108	235.667	122.982	118.108	191.218	0.0259344
B52	CG11337	0.319283	0.988051	0.456722	1.35654	1.2213	83.7237	81.7798	110.937	82.9863	81.7798	99.8774	0.0821599
B52	CG11398	0.140181	0.600446	0.779029	1.42658	1.52971	33.2873	32.3669	46.1739	33.5099	32.3669	49.5119	0.0426835
B52	CG11412	0.00896219	8.96388	8.93434	2.33019	2.3174	181.267	166.502	387.98	181.125	166.502	385.851	0.00406287
B52	CG11414	0.195885	0.342108	0.360151	1.22369	1.22245	141.745	139.663	170.903	141.734	139.663	170.731	0.0555066
B52	CG11417	0.000449727	84.5804	83.8192	6.77128	6.3557	558.715	403.477	2732.05	547.537	403.477	2564.37	0.000245413
B52	CG1142	0.00108935	43.2852	50.3375	5.11675	5.6239	148.762	116.727	597.262	152.709	116.727	656.459	0.000559383
B52	CG1143	0.0192959	4.72656	4.49293	5.92374	5.8381	6.99185	5.26396	31.1824	6.9618	5.26396	30.7315	0.00806393
B52	CG11444	0.58794	0.513596	0.207314	1.14665	1.07352	175.85	174.147	199.687	175.001	174.147	186.95	0.133694
B52	CG11447	0.0122512	6.52813	7.94686	2.5285	2.81559	58.7986	53.3611	134.924	59.8199	53.3611	150.243	0.00538127
B52	CG11455	0.0043965	18.2178	15.4166	3.35741	3.11472	110.366	95.3766	320.219	108.823	95.3766	297.071	0.00209427
B52	CG1146	0.287677	0.188804	0.213755	1.07418	1.08783	359.608	357.838	384.382	359.934	357.838	389.266	0.0756735
B52	CG11504	0.0253387	3.93168	3.4255	1.88692	1.83279	93.2352	88.0301	166.106	92.9175	88.0301	161.34	0.0102612
B52	CG11523	0.167589	0.436041	0.418118	1.1869	1.18958	164.2	162.18	192.491	164.229	162.18	192.926	0.0490755
B52	CG11526	0.165406	0.993764	0.597817	1.28691	1.20738	540.416	530.273	682.414	537.604	530.273	640.24	0.048602
B52	CG11534	0.0524526	1.88665	2.69744	2.08189	2.55334	20.0728	18.7224	38.9779	20.6612	18.7224	47.8046	0.0191888
B52	CG11550	0.806578	0.467488	0.154361	2.48727	1.77039	2.11997	1.92873	4.79729	2.02779	1.92873	3.41461	0.17499
B52	CG11555	0.00184451	29.4749	36.1597	4.93494	5.71233	77.155	61.1211	301.629	80.3227	61.1211	349.144	0.00091901
B52	CG11583	0.000758187	56.5045	62.8368	5.54278	5.69995	343.219	263.437	1460.17	345.98	263.437	1501.58	0.000398226
B52	CG11586	0.00137876	42.0894	37.251	4.96681	4.54181	173.729	137.395	682.414	169.836	137.395	624.021	0.000700143
B52	CG11593	0.005115	15.3525	13.6682	2.81515	2.67169	181.241	161.676	455.142	179.695	161.676	431.949	0.00239803
B52	CG11596	0.827746	0.429277	1.52369	1.11511	1.37537	141.974	140.892	157.111	144.418	140.892	193.779	0.179397
B52	CG1161	1	0.49989	0.0170831	1.15554	1.00167	199.767	197.717	228.471	197.739	197.717	198.048	0.323692
B52	CG11626	0.161612	1.10451	0.645862	14.3646	10.2245	0.31576	0.166982	2.39864	0.269671	0.166982	1.70731	0.0476936
B52	CG11638	0.0906632	1.04382	0.896691	1.59263	1.54054	61.058	58.7373	93.5471	60.854	58.7373	90.4873	0.0301427
B52	CG11656	0.0156446	8.00723	5.78892	15.4532	11.7667	3.2764	1.66861	25.7854	2.86631	1.66861	19.634	0.00669157
B52	CG11671	0.0129725	6.24129	7.04199	2.49778	2.65894	59.6752	54.2575	135.523	60.2582	54.2575	144.267	0.0056592
B52	CG11695	0.0287989	6.93263	4.11108	3.46776	2.72963	34.2335	29.3972	101.942	32.7869	29.3972	80.2434	0.0114777
B52	CG11696	0.00474628	16.7394	14.5017	4.73914	4.37227	45.3677	36.3152	172.103	44.4795	36.3152	158.78	0.00225038
B52	CG11699	0.181756	0.434399	0.571775	1.47928	1.63787	15.0598	14.5935	21.5878	15.2141	14.5935	23.9023	0.0522484
B52	CG11700	0.0149503	6.61563	5.62373	3.0168	2.86306	33.825	29.8161	89.9491	33.5194	29.8161	85.3653	0.00640837
B52	CG11710	0.00262141	29.5218	23.3529	3.97024	3.45944	185.652	154.966	615.252	180.374	154.966	536.094	0.00129574
B52	CG11739	0.222121	0.787353	0.449609	1.70568	1.52464	15.8286	15.1174	25.7854	15.6461	15.1174	23.0486	0.0613041
B52	CG11752	0.0170375	8.21625	5.63205	3.62639	2.99824	44.4978	37.8675	137.322	42.9121	37.8675	113.536	0.00724429
B52	CG11771	0.862763	0.0482407	0.0169761	1.04917	1.03305	275.246	274.346	287.837	274.951	274.346	283.413	0.186913
B52	CG11779	0.931353	0.110202	0.35588	1.07148	1.1567	202.436	201.475	215.878	203.58	201.475	233.047	0.207819
B52	CG11788	0.112169	0.821632	1.13864	1.36971	1.4949	53.8309	52.536	71.9593	54.2693	52.536	78.5361	0.0357244
B52	CG11790	0.0820629	1.29587	1.96114	1.48037	1.72423	59.7808	57.9258	85.7515	60.7226	57.9258	99.8774	0.0278797
B52	CG11796	0.155378	1.35237	2.97413	2.22451	3.74249	6.41468	5.93055	13.1925	7.01484	5.93055	22.195	0.046195
B52	CG11802	0.320603	2.04685	0.790809	1.73447	1.39559	41.706	39.7592	68.961	40.8077	39.7592	55.4875	0.0824538
B52	CG11835	0.415621	1.02728	0.422458	5.56428	3.52049	1.26506	0.969927	5.39695	1.13291	0.969927	3.41461	0.101699
B52	CG11839	0.0154213	5.94754	5.46562	2.35199	2.31571	63.0922	57.8757	136.123	62.9522	57.8757	134.024	0.00660276
B52	CG11858	0.00145013	35.4083	40.9952	9.94818	11.1451	32.5282	20.3741	202.685	34.154	20.3741	227.072	0.000734452
B52	CG11873	0.0128878	6.56165	6.56563	1.82612	1.81747	522.817	495.526	904.888	522.531	495.526	900.604	0.00562298
B52	CG11883	0.447704	0.350555	0.175176	1.13485	1.08574	625.923	620.346	704.002	623.892	620.346	673.532	0.108075
B52	CG11897	0.0452698	2.04704	1.97324	1.4232	1.39847	991.675	964.465	1372.62	990.085	964.465	1348.77	0.0169676
B52	CG11898	0.330994	0.145621	0.125997	1.51344	1.50813	4.09787	3.96225	5.99661	4.09647	3.96225	5.97557	0.0845988
B52	CG11902	0.0935458	0.892102	0.928854	1.40501	1.42684	68.8171	67.0078	94.1467	68.9146	67.0078	95.6092	0.0309541
B52	CG11906	0.0114229	8.13475	7.11487	2.452	2.35298	96.2957	87.7969	215.278	95.7161	87.7969	206.584	0.00504703
B52	CG11927	0.0101858	7.87578	8.16511	2.6894	2.74223	71.6963	64.4388	173.302	71.9233	64.4388	176.706	0.00454654
B52	CG11964	0.020702	5.66592	4.3053	2.05335	1.90838	98.14	91.7005	188.293	97.2537	91.7005	174.999	0.00863901
B52	CG11970	0.159535	3.1737	1.38138	1.58217	1.34736	264.581	254.696	402.972	260.594	254.696	343.169	0.0471464
B52	CG11980	0.255187	0.226955	0.247449	1.17766	1.18293	110.258	108.968	128.327	110.297	108.968	128.902	0.0686547
B52	CG11982	0.0839109	2.96425	1.62	1.61798	1.42783	170.565	163.816	265.05	168.488	163.816	233.901	0.0283966
B52	CG11984	0.0473405	2.09303	2.96825	1.47793	1.56242	510.779	495.007	731.586	513.568	495.007	773.41	0.0176376
B52	CG12003	0.0740903	1.41587	2.13264	2.31916	2.97132	8.43922	7.75704	17.9898	8.77648	7.75704	23.0486	0.0255856
B52	CG12007	0.00127751	39.5462	42.3691	4.79283	4.85872	217.259	173.411	831.13	218.021	173.411	842.556	0.00064666
B52	CG12014	0.2685	1.07101	0.515576	1.22194	1.13651	386.452	380.817	465.337	384.283	380.817	432.802	0.0713557
B52	CG12020	0.21981	0.477746	0.786981	1.69945	2.90312	3.6931	3.52856	5.99661	3.97625	3.52856	10.2438	0.0607402
B52	CG12042	0.069737	2.73281	1.65322	1.53544	1.40147	137.526	132.786	203.885	136.34	132.786	186.096	0.0243048
B52	CG12050	0.0253487	3.49325	4.35268	1.66177	1.7618	233.225	223.37	371.19	234.715	223.37	393.534	0.0102684
B52	CG12065	0.000723367	59.2008	63.4103	5.14084	5.13834	554.159	434.275	2232.54	554.086	434.275	2231.45	0.000382993
B52	CG12071	0.0646065	2.24066	1.53092	5.22799	4.37786	2.49955	1.94993	10.1942	2.38904	1.94993	8.53653	0.0228159
B52	CG12075	0.00639544	12.1347	11.6714	2.39001	2.33326	339.402	310.618	742.38	338.227	310.618	724.752	0.00296686
B52	CG12082	0.00753933	13.5511	10.3049	2.44958	2.204	276.513	252.146	617.65	272.385	252.146	555.728	0.0034592
B52	CG12090	0.00263527	23.2908	23.8234	3.28992	3.28342	234.049	203.051	668.022	233.961	203.051	666.703	0.00130439
B52	CG12099	0.0255839	3.54084	3.4891	1.66857	1.64565	339.741	325.245	542.693	339.245	325.245	535.241	0.0103522
B52	CG12105	0.0585423	3.12405	1.9211	4.7814	3.65233	6.4383	5.14203	24.5861	6.05125	5.14203	18.7804	0.0210986
B52	CG12128	0.0107908	7.55371	7.72917	2.39342	2.44925	85.7055	78.4206	187.694	85.9974	78.4206	192.072	0.00479999
B52	CG12129	0.160127	1.12629	2.30564	1.65617	1.97692	60.8443	58.2942	96.5454	62.0908	58.2942	115.243	0.0473449
B52	CG12134	0.0894663	1.07329	1.49541	1.31764	1.44049	84.1175	82.3732	108.539	84.7922	82.3732	118.658	0.0298647
B52	CG12155	0.0473265	3.54351	2.2538	1.73195	1.55343	188.465	179.696	311.224	186.326	179.696	279.145	0.0176247
B52	CG12163	0.00157676	36.8437	34.0514	3.68945	3.44738	633.104	536.849	1980.68	624.44	536.849	1850.72	0.000792402
B52	CG12179	0.00939719	9.24936	8.40438	3.87669	3.74483	30.9706	25.9869	100.743	30.7422	25.9869	97.3165	0.00422782
B52	CG1218	0.0193168	7.52865	5.07389	2.9428	2.528	40.0487	35.4564	104.341	39.0682	35.4564	89.6336	0.00807577
B52	CG12203	0.206495	1.21457	0.624577	1.55931	1.36213	70.2078	67.684	105.54	69.3181	67.684	92.1946	0.0577494
B52	CG12204	0.000614977	78.6293	64.9603	10.266	8.46017	106.591	65.8894	676.417	98.6591	65.8894	557.436	0.000327059
B52	CG12206	0.0767713	2.06411	1.34025	1.62478	1.47904	113.027	108.507	176.3	111.972	108.507	160.487	0.0263572
B52	CG12219	0.0239161	4.53599	3.65127	2.21048	2.07747	60.3936	55.8839	123.53	59.8981	55.8839	116.097	0.00977693
B52	CG12224	0.592669	0.790228	2.56456	1.40744	1.85293	58.206	56.6668	79.7549	59.889	56.6668	104.999	0.134473
B52	CG12229	0.00898733	8.91296	8.93155	9.1153	9.5614	5.77853	3.74981	34.1807	5.89005	3.74981	35.8534	0.00407433
B52	CG12236	0.0459146	2.44906	1.94719	1.62433	1.54155	155.739	149.516	242.863	154.914	149.516	230.486	0.0171924
B52	CG12237	0.0760227	2.05193	1.34213	1.60653	1.47488	95.1474	91.4496	146.917	94.3447	91.4496	134.877	0.0261317
B52	CG12259	0.000592845	66.5686	75.1619	7.02891	7.55498	154.288	110.054	773.562	158.148	110.054	831.458	0.000319639
B52	CG12262	1	0.801627	0.0322349	1.22144	1.01584	328.309	323.533	395.176	323.875	323.533	328.657	0.322082
B52	CG12264	0.177877	0.861569	0.528368	1.18661	1.13781	493.737	487.67	578.673	492.15	487.67	554.875	0.0513586
B52	CG12272	0.565154	0.586656	1.70393	1.38009	1.69673	58.8086	57.3553	79.1552	60.0194	57.3553	97.3165	0.129752
B52	CG12288	0.0198681	5.33777	8.77145	1.89341	2.22609	451.011	425.658	805.944	460.452	425.658	947.555	0.0082952
B52	CG12299	0.490062	0.769159	0.315421	1.25729	1.14801	262.454	258.028	324.416	260.574	258.028	296.218	0.115567
B52	CG12301	0.00609236	13.1383	19.7003	2.51427	2.97793	329.801	299.56	753.174	339.06	299.56	892.068	0.00282945
B52	CG12304	0.16301	0.571925	0.44416	1.2181	1.19562	109.379	107.812	131.326	109.218	107.812	128.902	0.0480081
B52	CG12309	0.381131	0.819087	0.369298	33.8353	12.0416	0.226075	0.0708918	2.39864	0.123076	0.0708918	0.853653	0.0946026
B52	CG12316	0.217631	0.758549	0.442136	1.37632	1.27779	82.1799	80.1687	110.338	81.6533	80.1687	102.438	0.060269
B52	CG12320	0.996786	0.718749	0.120815	1.68658	1.23799	23.7966	22.7551	38.3783	23.1161	22.7551	28.1706	0.260968
B52	CG12325	0.142759	1.31967	2.75951	1.3749	1.57557	286.559	279.572	384.382	290.3	279.572	440.485	0.043253
B52	CG12333	0.068425	1.27823	1.46116	1.4459	1.49614	96.9425	94.1438	136.123	97.2578	94.1438	140.853	0.0239169
B52	CG1234	0.00699165	11.6328	17.362	2.62201	3.14012	143.697	129.674	340.008	148.176	129.674	407.193	0.00322217
B52	CG12343	0.0875506	1.98361	4.00873	1.42684	1.67193	317.69	308.9	440.751	322.737	308.9	516.46	0.0293673
B52	CG12344	0.635132	0.0487914	0.0867463	1.06346	1.08589	108.156	107.7	114.535	108.317	107.7	116.951	0.142069
B52	CG1236	0.00450806	15.4181	15.7486	3.04214	3.11489	109.29	96.1935	292.634	109.756	96.1935	299.632	0.00214052
B52	CG12362	0.384265	0.446597	0.2292	8.16518	5.81181	0.217045	0.146882	1.19932	0.194001	0.146882	0.853653	0.095216
B52	CG12379	0.113413	0.959034	0.724687	1.68505	1.62497	11.5358	11.032	18.5895	11.4917	11.032	17.9267	0.036028
B52	CG12384	0.147974	0.541596	0.680652	1.22416	1.28664	106.395	104.829	128.327	106.832	104.829	134.877	0.0444576
B52	CG1239	0.0505372	1.74793	1.89109	1.68733	1.80151	29.734	28.4312	47.9729	29.9504	28.4312	51.2192	0.0185737
B52	CG12391	0.000260662	120.129	126.073	9.01455	8.85629	465.412	303.338	2734.45	462.212	303.338	2686.45	0.000153309
B52	CG12393	0.0161287	5.83244	5.22417	2.51739	2.43294	57.1824	51.9293	130.726	56.89	51.9293	126.341	0.00686511
B52	CG1240	0.000225028	131.065	145.255	8.80408	8.85616	1512.74	995.043	8760.44	1516.19	995.043	8812.26	0.000135577
B52	CG12400	0.992832	0.631535	0.118282	1.1766	1.03306	172.229	170.225	200.287	170.6	170.225	175.853	0.250826
B52	CG12413	0.0236885	6.13171	4.16559	2.64429	2.30788	42.2746	38.0983	100.743	41.4202	38.0983	87.9263	0.00970615
B52	CG12428	0.568784	0.0404538	0.0609302	1.07593	1.08891	71.7007	71.3395	76.7566	71.7624	71.3395	77.6825	0.130424
B52	CG12493	0.0114885	6.89441	7.89853	2.456	2.64461	62.6795	57.1337	140.321	63.3979	57.1337	151.097	0.00506917
B52	CG12499	0.0270757	3.27541	3.42986	1.58933	1.58322	659.559	634.626	1008.63	659.301	634.626	1004.75	0.0109015
B52	CG12502	0.00675912	12.6856	10.9458	4.64902	4.32066	30.9504	24.8944	115.735	30.4055	24.8944	107.56	0.00311637
B52	CG12582	0.00303604	21.6897	20.8664	2.80281	2.75125	366.686	327.343	917.481	365.561	327.343	900.604	0.00149197
B52	CG12592	0.0727403	1.63321	2.70097	2.3163	2.99208	15.2067	13.9799	32.3817	15.8365	13.9799	41.829	0.0251727
B52	CG12605	0.172013	0.645672	1.06115	2.49026	3.29182	3.70617	3.37124	8.39525	3.88632	3.37124	11.0975	0.0500213
B52	CG12698	0.0191234	5.07544	4.47494	2.83988	2.73663	30.8174	27.4504	77.9559	30.6284	27.4504	75.1215	0.00800854
B52	CG12702	0.0195076	5.26447	4.4109	1.88415	1.81758	143.236	135.263	254.856	142.636	135.263	245.852	0.00815967
B52	CG1271	0.0646199	1.73041	2.73857	2.02118	2.43769	22.8158	21.3615	43.1756	23.4089	21.3615	52.0729	0.0228246
B52	CG12717	0.0157018	5.38346	6.77098	1.9244	2.07774	186.248	175.436	337.609	188.041	175.436	364.51	0.00671323
B52	CG12721	0.0856893	1.18241	0.969838	1.94701	1.91151	9.4956	8.9317	17.3902	9.47446	8.9317	17.0731	0.0288669
B52	CG12746	0.00651525	12.1459	11.3935	3.31634	3.22378	73.06	63.287	209.881	72.6694	63.287	204.023	0.00301441
B52	CG12768	0.094064	1.49555	1.01529	1.39314	1.31779	134.283	130.854	182.297	133.626	130.854	172.438	0.0311215
B52	CG12782	0.994278	0.125441	0.61224	1.28136	2.15575	5.24442	5.14786	6.59627	5.5445	5.14786	11.0975	0.254027
B52	CG12796	0.0349437	2.53523	2.75614	15.5021	17.3393	1.06514	0.541556	8.39525	1.13146	0.541556	9.39019	0.013646
B52	CG12811	0.46118	0.143224	0.0862702	1.08281	1.06267	73.5051	73.1015	79.1552	73.4069	73.1015	77.6825	0.110415
B52	CG12818	0.0100383	7.97438	10.7256	2.44861	2.77332	110.374	100.653	246.461	112.553	100.653	279.145	0.00448871
B52	CG12822	0.00129924	39.7232	41.1162	5.79093	5.88839	99.4635	75.3856	436.553	99.9532	75.3856	443.9	0.000657916
B52	CG12848	0.00101912	47.2134	49.4808	8.28934	8.41909	74.2796	49.9877	414.366	74.712	49.9877	420.851	0.000525213
B52	CG12859	0.731751	0.0613312	0.131053	1.16797	1.21431	46.2063	45.6946	53.3698	46.3475	45.6946	55.4875	0.159242
B52	CG12868	0.0150154	5.73281	7.70724	2.05765	2.30259	121.048	113.075	232.668	122.894	113.075	260.364	0.00643791
B52	CG12869	0.243586	0.302876	0.411734	2.82983	3.35703	1.42654	1.27144	3.59796	1.47123	1.27144	4.26827	0.0659914
B52	CG12877	0.018401	4.89659	4.70613	1.8988	1.85328	647.375	610.778	1159.74	645.522	610.778	1131.94	0.0077513
B52	CG12909	0.0410822	2.44984	3.56601	1.48952	1.65496	187.492	181.567	270.447	189.495	181.567	300.486	0.0156874
B52	CG12920	0.316817	0.227889	0.337286	1.44565	1.8293	3.84415	3.73324	5.39695	3.93964	3.73324	6.82923	0.0815805
B52	CG12923	0.171062	2.92827	1.26614	9.42668	5.11217	2.08634	1.33588	12.5929	1.7021	1.33588	6.82923	0.0498083
B52	CG12926	0.029978	3.32111	4.89427	2.68604	3.39203	15.3974	13.8415	37.179	16.0488	13.8415	46.9509	0.0118865
B52	CG12929	1	9.18066e-05	0.254236	1.13815	1.51896	8.50762	8.42998	9.59457	8.72164	8.42998	12.8048	0.33652
B52	CG12942	0.0141758	8.78488	6.35346	2.50545	2.23524	96.6544	87.8386	220.075	95.072	87.8386	196.34	0.00610798
B52	CG12990	1	0.00233936	0.495099	1.10481	3.14553	1.09313	1.08555	1.19932	1.24082	1.08555	3.41461	0.33652
B52	CG13001	0.991392	0.0512356	0.22389	1.03377	1.1134	176.739	176.342	182.297	177.676	176.342	196.34	0.248313
B52	CG13005	0.302226	0.168676	0.186993	1.21182	1.25462	16.5604	16.3298	19.7888	16.607	16.3298	20.4877	0.0786466
B52	CG1307	0.0398126	3.64714	2.48765	1.69925	1.56365	133.704	127.749	217.077	132.549	127.749	199.755	0.0152359
B52	CG13085	0.370012	0.125643	0.156832	1.41622	1.51206	5.22206	5.08107	7.19593	5.25453	5.08107	7.68288	0.0922509
B52	CG13096	0.000268171	119.539	145.806	8.43171	9.26313	994.745	665.182	5608.63	1031.61	665.182	6161.67	0.000156045
B52	CG13097	0.0017368	31.1048	34.5746	3.44757	3.56171	652.074	560.6	1932.71	656.34	560.6	1996.7	0.000867198
B52	CG13124	0.123277	0.79577	1.17179	1.2325	1.29282	488.151	480.7	592.465	490.084	480.7	621.46	0.0385556
B52	CG13126	0.308795	0.16272	0.146935	1.07748	1.08466	78.3181	77.9157	83.9525	78.3554	77.9157	84.5117	0.0798467
B52	CG13144	0.12291	0.99039	0.699073	3.99355	3.34416	3.06211	2.55267	10.1942	2.9516	2.55267	8.53653	0.038455
B52	CG13151	0.0720653	4.93729	2.39572	2.79742	2.13974	32.1665	28.7245	80.3545	30.9071	28.7245	61.463	0.0249735
B52	CG1316	0.00970923	8.34163	8.36723	2.00478	1.98403	604.155	566.227	1135.16	603.372	566.227	1123.41	0.00436074
B52	CG13163	0.287382	0.893795	2.17774	1.47256	1.80713	60.9077	59.0475	86.9508	62.2248	59.0475	106.707	0.0755904
B52	CG13168	0.0279146	3.15431	3.67675	4.13499	4.70913	7.01321	5.80084	23.9864	7.23524	5.80084	27.3169	0.0111995
B52	CG13185	0.00288842	21.8268	31.1675	4.06848	4.8025	1016.61	843.966	3433.66	1057.91	843.966	4053.15	0.00141662
B52	CG13197	0.00830262	9.14067	11.4149	2.49117	2.73597	116.973	106.396	265.05	118.709	106.396	291.096	0.00378936
B52	CG13203	0.784298	0.227793	0.0842093	3.06591	2.18225	0.445056	0.39118	1.19932	0.422011	0.39118	0.853653	0.16971
B52	CG13220	0.0919574	0.91141	0.943773	1.24899	1.27963	128.855	126.751	158.31	129.114	126.751	162.194	0.030531
B52	CG13239	0.513825	0.0982641	0.161807	2.5379	3.61285	0.260508	0.236282	0.599661	0.27744	0.236282	0.853653	0.120192
B52	CG13247	0.987401	0.485273	0.100865	3.83336	2.18281	0.929903	0.78216	2.9983	0.843836	0.78216	1.70731	0.242743
B52	CG13248	0.999841	0.0499977	0.365647	1.22688	1.60099	11.9079	11.7305	14.3919	12.2005	11.7305	18.7804	0.286458
B52	CG13250	0.979014	0.0548959	0.209082	1.5021	2.13834	1.65031	1.59686	2.39864	1.71804	1.59686	3.41461	0.234076
B52	CG13288	0.998522	0.840379	0.128066	2.5261	1.54117	5.49228	4.9851	12.5929	5.16495	4.9851	7.68288	0.268912
B52	CG13293	0.0851896	1.17701	1.70328	4.84208	6.893	1.08895	0.866905	4.19762	1.20748	0.866905	5.97557	0.028733
B52	CG13295	0.988709	0.526657	0.106537	1.17185	1.05001	189.954	187.802	220.075	188.429	187.802	197.194	0.244401
B52	CG13298	0.00222974	30.525	26.0865	3.27379	3.04607	231.397	200.938	657.828	228.346	200.938	612.069	0.0011078
B52	CG13308	0.0715575	1.24413	1.21715	5.67132	6.0551	1.10931	0.845885	4.79729	1.13095	0.845885	5.12192	0.024839
B52	CG13331	0.333823	0.149815	0.181214	1.16664	1.66078	0.519718	0.514008	0.599661	0.536651	0.514008	0.853653	0.0851757
B52	CG13337	0.0934545	1.59769	1.05445	15.9558	10.3245	0.8256	0.41341	6.59627	0.6704	0.41341	4.26827	0.0309318
B52	CG13364	0.0340931	2.9695	2.57133	1.70006	1.62822	402.787	384.826	654.23	400.943	384.826	626.582	0.0133412
B52	CG13367	0.0199378	5.24082	4.32678	3.09529	2.89786	24.5083	21.5044	66.5623	24.2252	21.5044	62.3167	0.00831637
B52	CG13369	0.123282	3.05608	1.45573	2.59092	2.01182	19.7116	17.8214	46.1739	19.0236	17.8214	35.8534	0.038561
B52	CG13390	0.15278	2.02825	5.16768	1.58445	2.08013	106.167	102.186	161.908	109.544	102.186	212.56	0.0455677
B52	CG13397	0.0668973	2.18893	1.4856	1.37308	1.29526	557.249	543.726	746.578	554.429	543.726	704.264	0.0234561
B52	CG13409	0.0264416	3.52211	3.3246	4.93949	4.92216	6.13141	4.85606	23.9864	6.1258	4.85606	23.9023	0.0106899
B52	CG13436	0.788219	0.564603	0.184628	1.96536	1.2913	4.22176	3.96649	7.79559	4.04352	3.96649	5.12192	0.170601
B52	CG13458	0.973746	0.772194	0.169146	3.11438	1.66256	1.7575	1.54037	4.79729	1.60841	1.54037	2.56096	0.229367
B52	CG13484	0.344739	0.565236	1.27011	1.33281	1.67079	30.8136	30.1448	40.1773	31.4928	30.1448	50.3655	0.0871293
B52	CG13502	1	0.0164541	0.336268	1.45686	4.14787	0.424147	0.411611	0.599661	0.49799	0.411611	1.70731	0.318723
B52	CG13531	0.0510773	1.90307	1.70878	1.46904	1.4478	164.176	159.198	233.868	163.951	159.198	230.486	0.01876
B52	CG1354	0.00224682	29.2704	25.9717	3.17253	2.96052	556.563	486.151	1542.33	549.692	486.151	1439.26	0.00111286
B52	CG13551	0.163907	2.11065	1.01364	1.72539	1.44782	193.474	184.549	318.42	190.059	184.549	267.194	0.0482267
B52	CG13562	0.17119	0.446087	0.396869	2.45897	2.50035	1.8731	1.70706	4.19762	1.87781	1.70706	4.26827	0.0498361
B52	CG13563	0.0114619	8.38415	7.11738	3.07406	2.89064	48.4056	42.5256	130.726	47.8856	42.5256	122.926	0.0050581
B52	CG13605	0.0413742	4.26267	2.66577	1.97736	1.74638	79.1408	74.2996	146.917	77.9967	74.2996	129.755	0.0157614
B52	CG13617	0.0516874	1.78261	2.29623	2.11009	2.30851	32.9636	30.6922	64.7634	33.3696	30.6922	70.8532	0.0189492
B52	CG13625	0.000261376	119.764	131.67	14.6969	15.1678	132.544	69.2816	1018.22	134.719	69.2816	1050.85	0.000153759
B52	CG13630	0.91791	0.619458	0.165382	1.20299	1.07714	142.977	141.068	169.704	141.794	141.068	151.95	0.203278
B52	CG13634	1	0.0551256	0.972414	1.13911	1.99014	11.6888	11.5814	13.1925	12.3459	11.5814	23.0486	0.317617
B52	CG13646	0.059597	1.46629	1.60476	5.82542	6.34158	2.31291	1.74996	10.1942	2.37313	1.74996	11.0975	0.0214351
B52	CG13650	0.908263	0.120578	0.0367797	1.71388	1.46388	1.83269	1.74943	2.9983	1.80353	1.74943	2.56096	0.200142
B52	CG13667	0.124498	0.643474	0.745066	1.40081	1.46557	36.4802	35.5308	49.7718	36.6336	35.5308	52.0729	0.0388178
B52	CG13693	1	0.386378	0.00390898	2.21724	1.26255	2.924	2.70453	5.99661	2.75187	2.70453	3.41461	0.33652
B52	CG13708	0.0142685	5.9583	6.05359	10.1587	10.4615	4.46836	2.77438	28.1841	4.52437	2.77438	29.0242	0.00615459
B52	CG13733	0.993261	0.0653047	0.300276	1.07836	1.84214	2.79495	2.78043	2.9983	2.93653	2.78043	5.12192	0.251694
B52	CG13742	0.0775068	1.36834	1.09911	1.98385	1.90086	16.749	15.7181	31.1824	16.6621	15.7181	29.8779	0.0265821
B52	CG13749	0.189619	0.955392	0.549699	3.02486	2.39226	2.02505	1.7842	5.39695	1.9498	1.7842	4.26827	0.0541337
B52	CG13751	0.221308	1.79516	0.81094	1.47118	1.28135	163.539	158.559	233.268	161.533	158.559	203.169	0.0611129
B52	CG13759	0.0988358	1.23324	2.06292	3.48702	5.41525	2.2053	1.89166	6.59627	2.44848	1.89166	10.2438	0.0323117
B52	CG13760	0.0340154	2.86343	4.03143	1.80291	1.99444	113.183	107.432	193.69	114.554	107.432	214.267	0.013309
B52	CG13771	0.999829	0.915961	0.109838	1.38738	1.05641	38.1313	37.1713	51.5708	37.3111	37.1713	39.2681	0.286031
B52	CG13773	0.392264	0.161854	0.246086	1.14154	1.18709	74.7675	74.0686	84.5522	74.9925	74.0686	87.9263	0.0968982
B52	CG13784	0.0189327	4.49508	5.26765	1.85935	1.94826	250.626	237.045	440.751	252.031	237.045	461.826	0.00793445
B52	CG13794	0.112783	0.715831	0.752563	4.02844	4.58779	0.894551	0.744283	2.9983	0.922305	0.744283	3.41461	0.0358747
B52	CG13801	0.0596408	1.46629	1.59135	3.5214	4.07301	3.18264	2.72464	9.59457	3.28283	2.72464	11.0975	0.02145
B52	CG13807	0.002287	26.6663	26.1777	3.80563	3.74374	181.62	153.002	582.27	180.989	153.002	572.801	0.00113108
B52	CG13830	0.999999	0.0214169	0.281669	1.107	2.10118	1.63669	1.62509	1.79898	1.7444	1.62509	3.41461	0.308467
B52	CG13843	0.0578192	1.61037	1.51473	3.95351	4.16893	4.90168	4.09531	16.1908	4.96049	4.09531	17.0731	0.0208545
B52	CG13850	0.04951	2.18988	1.78541	1.59074	1.53764	95.2111	91.6035	145.718	94.8868	91.6035	140.853	0.0183045
B52	CG13868	0.0113812	7.23287	7.3803	2.04359	2.06753	199.609	186.625	381.384	199.906	186.625	385.851	0.00502864
B52	CG13875	0.999944	0.0169812	0.151496	1.25332	1.78417	1.94616	1.91383	2.39864	2.01389	1.91383	3.41461	0.29228
B52	CG13889	0.00685621	11.0598	11.252	9.79369	10.1245	8.15848	5.14326	50.3715	8.2719	5.14326	52.0729	0.00315977
B52	CG13893	0.0842661	2.88383	6.794	2.32419	3.4177	25.5514	23.4787	54.5691	27.2631	23.4787	80.2434	0.0284628
B52	CG13894	0.999996	0.611358	0.0528045	2.014	1.20718	6.03959	5.65717	11.3936	5.7353	5.65717	6.82923	0.302567
B52	CG13895	0.881689	0.282274	0.962155	1.1988	1.38831	345.163	340.648	408.369	349.466	340.648	472.924	0.191765
B52	CG13901	0.00274559	25.1775	22.2182	3.96254	3.68981	129.935	108.505	429.957	127.962	108.505	400.363	0.00134698
B52	CG13902	0.0860019	1.06459	0.957641	1.56365	1.58127	72.8178	70.1807	109.738	72.9003	70.1807	110.975	0.0289467
B52	CG13917	0.00416373	15.9465	17.503	2.63268	2.71093	350.565	316.153	832.329	352.214	316.153	857.068	0.00199228
B52	CG13920	0.435294	0.0727043	0.0613195	1.17857	1.18431	8.75262	8.64965	10.1942	8.75593	8.64965	10.2438	0.105578
B52	CG13921	0.433923	1.17736	0.464507	1.7903	1.44421	21.1558	20.097	35.9796	20.6921	20.097	29.0242	0.105326
B52	CG13924	0.00595249	13.2509	12.2722	8.37752	8.33377	8.86316	5.94112	49.7718	8.84583	5.94112	49.5119	0.00277668
B52	CG13928	0.103348	0.795724	0.898122	1.63112	1.84705	16.8566	16.176	26.3851	17.0895	16.176	29.8779	0.0334842
B52	CG13957	0.278633	1.69214	0.720478	1.68047	1.4136	49.2398	47.103	79.1552	48.4018	47.103	66.585	0.0735676
B52	CG1399	0.0165379	6.23357	5.13869	1.81442	1.71144	542.176	514.255	933.072	538.646	514.255	880.117	0.00704888
B52	CG13993	0.000859025	52.6991	70.1433	6.07169	7.33468	158.852	118.714	720.792	168.848	118.714	870.726	0.000447461
B52	CG13994	0.0348593	3.26744	2.5694	2.22481	2.0792	38.192	35.3089	78.5555	37.8492	35.3089	73.4142	0.0136171
B52	CG14000	0.0766339	1.47748	1.14004	4.27202	3.80092	2.73582	2.24591	9.59457	2.66529	2.24591	8.53653	0.0263085
B52	CG14005	0.0366612	4.19904	2.78496	1.84733	1.66433	125.176	118.483	218.876	123.73	118.483	197.194	0.0142098
B52	CG14015	0.223542	0.778809	1.62276	1.79199	2.46872	10.9214	10.3736	18.5895	11.3894	10.3736	25.6096	0.0615859
B52	CG14034	0.990317	0.138243	0.0274526	2.47517	1.76177	0.532194	0.484542	1.19932	0.509149	0.484542	0.853653	0.246615
B52	CG14036	0.0491402	2.07862	1.78154	2.10027	2.02539	28.5007	26.553	55.7684	28.3681	26.553	53.7802	0.0181778
B52	CG14043	0.0309446	3.14879	2.83113	1.78253	1.74568	99.8167	94.8676	169.104	99.5836	94.8676	165.609	0.0122487
B52	CG14044	0.730109	0.522558	0.183394	2.07426	1.47641	3.09801	2.89097	5.99661	2.98279	2.89097	4.26827	0.158954
B52	CG14050	0.520343	0.70413	0.284297	5.91853	3.37015	0.67271	0.506596	2.9983	0.586644	0.506596	1.70731	0.121365
B52	CG14053	0.999974	0.45879	0.0470178	4.6278	2.19598	0.482751	0.388734	1.79898	0.419729	0.388734	0.853653	0.295993
B52	CG14054	0.839046	2.29089	0.563342	8.97614	3.40749	1.53495	1.00209	8.99491	1.16293	1.00209	3.41461	0.181742
B52	CG14073	0.0139349	5.90849	7.30674	2.45588	2.6036	316.893	288.857	709.399	319.738	288.857	752.069	0.00600546
B52	CG14074	0.0455606	1.94006	2.11922	2.0354	2.1269	29.6055	27.6939	56.3681	29.7744	27.6939	58.9021	0.0170685
B52	CG14103	0.0493376	1.87493	1.79688	1.46041	1.46531	140.507	136.323	199.087	140.551	136.323	199.755	0.0182499
B52	CG14104	0.170409	0.628738	0.448577	1.35797	1.30618	33.4572	32.6774	44.3749	33.3444	32.6774	42.6827	0.0496412
B52	CG14117	0.735972	0.259765	0.711336	1.11766	1.35489	69.2147	68.676	76.7566	70.3008	68.676	93.0482	0.160087
B52	CG14130	0.273954	0.389387	0.666154	1.4568	1.65908	19.0874	18.5233	26.9847	19.3371	18.5233	30.7315	0.0725393
B52	CG14154	0.077545	1.24352	1.71958	3.1435	3.91559	3.48835	3.05219	9.59457	3.64546	3.05219	11.9511	0.02659
B52	CG14174	0.0261287	3.34587	3.68307	3.02048	3.22487	16.2197	14.2943	43.1756	16.4145	14.2943	46.0973	0.0105675
B52	CG14183	0.00466027	14.6368	18.279	10.8367	13.3892	9.7122	5.86565	63.564	10.7103	5.86565	78.5361	0.00221215
B52	CG14196	0.305252	0.170574	0.196037	1.65931	1.88971	1.88638	1.80695	2.9983	1.91413	1.80695	3.41461	0.0791838
B52	CG14200	0.0142126	6.35674	5.87559	2.19701	2.09086	952.256	881.881	1937.5	946.015	881.881	1843.89	0.00612324
B52	CG14210	0.00718082	10.7325	10.766	2.38042	2.37668	243.185	222.691	530.1	243.13	222.691	529.265	0.00329822
B52	CG14215	0.00390153	22.7337	17.2427	3.17288	2.75524	302.923	264.594	839.525	295.556	264.594	729.02	0.00188598
B52	CG14220	0.30302	0.202467	0.266839	1.08702	1.12324	143.707	142.878	155.312	144.052	142.878	160.487	0.0788035
B52	CG14221	0.0279585	4.22534	3.229	4.56097	3.95656	10.4121	8.41449	38.3783	10.073	8.41449	33.2925	0.0112167
B52	CG14230	0.000312115	104.974	112.762	9.2888	9.46564	239.853	154.486	1434.99	241.674	154.486	1462.31	0.000178609
B52	CG14232	0.000935575	52.5073	49.8392	6.55058	6.22009	117.14	85.5014	560.083	115.256	85.5014	531.826	0.00048352
B52	CG14252	1	0.00131061	0.26932	1.06983	1.43836	10.1363	10.0893	10.7939	10.3842	10.0893	14.5121	0.33652
B52	CG14260	0.271199	0.201297	0.207996	1.52234	1.62536	3.26099	3.15125	4.79729	3.28263	3.15125	5.12192	0.0719254
B52	CG14262	0.776393	0.477636	1.63929	2.26798	4.22203	3.72779	3.43723	7.79559	4.17556	3.43723	14.5121	0.168159
B52	CG14270	0.987407	0.283943	0.06001	1.20804	1.0794	47.308	46.6609	56.3681	46.9078	46.6609	50.3655	0.242755
B52	CG14273	0.0102829	7.76772	10.3322	6.28753	7.93099	10.1904	7.53446	47.3732	11.0159	7.53446	59.7557	0.00458482
B52	CG14275	0.11147	0.738181	0.860919	1.46828	1.54728	32.4293	31.4476	46.1739	32.595	31.4476	48.6582	0.0355494
B52	CG14285	0.131255	0.65031	0.569333	2.631	2.62177	2.52704	2.27921	5.99661	2.52564	2.27921	5.97557	0.0404748
B52	CG14299	0.0590117	1.81075	1.48807	1.38755	1.34502	341.814	333.205	462.338	340.869	333.205	448.168	0.0212329
B52	CG14322	0.152668	0.557869	0.749793	1.23893	1.29878	117.522	115.68	143.319	117.984	115.68	150.243	0.0455389
B52	CG1434	0.138858	0.609119	0.529209	1.40573	1.39785	59.5847	58.0155	81.5538	59.5543	58.0155	81.0971	0.0423528
B52	CG14341	0.144066	1.651	0.887981	1.35096	1.23781	295.724	288.963	390.379	293.544	288.963	357.681	0.0435301
B52	CG14346	0.0463356	1.94455	2.40096	1.84967	2.01958	35.284	33.3925	61.765	35.6622	33.3925	67.4386	0.0173238
B52	CG14352	0.175528	0.489364	0.687509	1.32538	1.4555	32.3581	31.6711	41.9762	32.6329	31.6711	46.0973	0.0507939
B52	CG14353	0.110066	0.758546	0.914866	1.37328	1.44294	56.3886	55.0194	75.5572	56.6441	55.0194	79.3898	0.0352094
B52	CG14367	0.99505	0.0448045	0.213998	1.3685	1.94815	2.24476	2.19093	2.9983	2.32942	2.19093	4.26827	0.2558
B52	CG14372	1	0.280914	0.0120939	1.79484	1.17926	4.57348	4.34333	7.79559	4.39524	4.34333	5.12192	0.318997
B52	CG14383	0.206246	0.676944	1.2627	2.29599	3.26848	4.25615	3.91766	8.99491	4.51014	3.91766	12.8048	0.0577172
B52	CG14407	0.122908	0.765121	0.626327	1.27775	1.26028	133.84	131.407	167.905	133.687	131.407	165.609	0.0384523
B52	CG14408	0.0612062	4.73333	2.45392	1.83029	1.55545	160.436	152.021	278.243	157.651	152.021	236.462	0.0218665
B52	CG1441	0.511599	1.0087	0.383657	2.60168	1.85183	5.10202	4.60979	11.9932	4.87158	4.60979	8.53653	0.119679
B52	CG14411	0.311083	0.737722	0.369588	1.32806	1.20203	373.74	365.741	485.725	370.667	365.741	439.631	0.0803874
B52	CG14414	0.0982671	2.39011	1.32392	1.82573	1.56132	94.603	89.667	163.707	93.0225	89.667	139.999	0.0321682
B52	CG14434	0.221425	0.351767	0.275592	1.2459	1.21289	142.356	140.06	174.501	142.048	140.06	169.877	0.0611341
B52	CG14440	0.327963	0.178441	0.23699	1.05445	1.09058	139.836	139.33	146.917	140.171	139.33	151.95	0.0839277
B52	CG14441	0.999997	0.00230462	0.051639	1.04743	1.06915	209.051	208.392	218.276	209.353	208.392	222.804	0.304479
B52	CG14443	0.328343	0.147097	0.168834	1.22652	1.25259	22.8295	22.4899	27.5844	22.8686	22.4899	28.1706	0.0840027
B52	CG14445	0.999599	0.0607803	0.404365	1.59852	3.41338	0.780209	0.750272	1.19932	0.870985	0.750272	2.56096	0.280118
B52	CG14451	0.161948	0.553634	0.784944	1.63403	1.83643	14.5348	13.9453	22.7871	14.7229	13.9453	25.6096	0.0477703
B52	CG14463	0.219233	0.402693	0.296071	1.3594	1.30513	38.8453	37.9363	51.5708	38.708	37.9363	49.5119	0.0606347
B52	CG14476	0.361627	1.43952	0.581344	1.29637	1.16518	730.674	716.517	928.874	724.408	716.517	834.873	0.0905648
B52	CG14480	0.0403917	2.55611	3.81331	1.63945	1.78738	216.613	207.757	340.607	218.662	207.757	371.339	0.015447
B52	CG14483	0.0938094	3.04424	1.58454	4.66349	3.31938	6.07967	4.88628	22.7871	5.64182	4.88628	16.2194	0.0310433
B52	CG14507	0.301082	0.343961	0.590632	1.79769	2.15504	6.67494	6.3379	11.3936	6.82594	6.3379	13.6585	0.0783984
B52	CG14508	0.357537	2.12596	0.786573	3.02157	2.1068	11.0351	9.72454	29.3834	10.4421	9.72454	20.4877	0.0897072
B52	CG14509	0.995309	0.495237	0.0907386	2.17737	1.37761	2.67321	2.47865	5.39695	2.54105	2.47865	3.41461	0.256573
B52	CG14512	0.900519	0.607168	2.6104	1.36886	2.04488	36.3566	35.484	48.5725	37.9558	35.484	72.5605	0.19761
B52	CG14526	0.0735197	4.86135	2.35473	2.41196	1.89352	36.995	33.8122	81.5538	35.8263	33.8122	64.024	0.0254165
B52	CG14527	0.00934577	8.49702	8.73573	2.59864	2.64084	88.3522	79.8429	207.483	88.5768	79.8429	210.852	0.00420513
B52	CG14543	0.00118573	40.8391	47.9622	8.99404	10.1995	60.3013	39.3371	353.8	63.4625	39.3371	401.217	0.000610859
B52	CG14562	0.114265	1.03118	1.70008	1.38212	1.52403	108.561	105.864	146.317	109.563	105.864	161.34	0.0362132
B52	CG14590	0.288385	0.49922	0.288561	1.68075	1.0634	3.35677	3.21104	5.39695	3.22461	3.21104	3.41461	0.0758035
B52	CG14609	0.342813	0.637933	0.318122	21.0238	14.9643	0.133198	0.0570459	1.19932	0.110153	0.0570459	0.853653	0.0868117
B52	CG14618	0.0167553	5.02678	5.96401	2.10021	2.27483	84.5847	78.8046	165.506	85.5021	78.8046	179.267	0.00713648
B52	CG14630	0.0395192	3.03815	2.30195	2.63783	2.40152	21.6852	19.5505	51.5708	21.3772	19.5505	46.9509	0.0151543
B52	CG14642	0.0264589	3.36303	3.46688	2.72272	2.90697	14.7323	13.2146	35.9796	14.8946	13.2146	38.4144	0.0106982
B52	CG14647	0.0339688	2.65791	2.70112	1.7495	1.76686	95.3704	90.8318	158.91	95.4755	90.8318	160.487	0.0132947
B52	CG14671	0.0974466	0.954378	1.30995	1.49741	1.63973	43.0295	41.6484	62.3647	43.4247	41.6484	68.2923	0.0319885
B52	CG14683	0.000149963	166.993	177.38	17.653	17.4611	192.61	91.2755	1611.29	191.442	91.2755	1593.77	0.000102862
B52	CG14691	0.163334	0.456119	0.539128	Inf	Inf	0.0399774	0	0.599661	0.0569102	0	0.853653	0.0480921
B52	CG14694	0.826717	0.408762	0.133408	2.40672	1.71306	1.09011	0.996643	2.39864	1.04402	0.996643	1.70731	0.179239
B52	CG14710	0.861593	0.699465	2.91162	1.39877	1.97701	61.6145	60.0189	83.9525	63.9282	60.0189	118.658	0.186587
B52	CG14722	0.0203657	4.60452	4.23144	1.90154	1.84055	193.23	182.275	346.604	192.489	182.275	335.486	0.00849213
B52	CG14749	0.0150267	5.59044	6.02128	2.06928	2.13188	126.974	118.525	245.261	127.469	118.525	252.681	0.00644283
B52	CG14778	0.181082	0.5703	0.8992	2.33348	3.04503	3.35792	3.08378	7.19593	3.50421	3.08378	9.39019	0.0521098
B52	CG14785	0.126259	2.34196	1.19043	2.95043	2.24006	6.89019	6.09736	17.9898	6.60144	6.09736	13.6585	0.0392861
B52	CG14786	0.999817	1.64911	0.186919	1.4577	1.11026	199.67	193.758	282.44	195.182	193.758	215.121	0.285592
B52	CG14797	0.179503	4.11698	1.62423	9.95944	5.25106	2.59669	1.62568	16.1908	2.0864	1.62568	8.53653	0.0517763
B52	CG14798	0.999394	0.110236	0.711478	1.39898	2.21281	7.92078	7.71555	10.7939	8.33939	7.71555	17.0731	0.276735
B52	CG14803	0.227778	0.27806	0.308041	1.19899	1.24134	33.447	33.009	39.5776	33.5401	33.009	40.9754	0.0624995
B52	CG14805	0.0137309	6.10617	6.31194	1.75517	1.78592	422.73	402.468	706.4	423.555	402.468	718.776	0.00593298
B52	CG14814	0.00740186	15.0215	10.8103	5.1303	4.24685	33.8391	26.5332	136.123	32.2764	26.5332	112.682	0.00339637
B52	CG14855	0.0748149	1.70674	2.9527	2.31351	3.29343	7.6112	6.99837	16.1908	8.06839	6.99837	23.0486	0.0257768
B52	CG14856	0.0815918	1.42545	1.07608	3.76273	3.44345	2.6421	2.23116	8.39525	2.59461	2.23116	7.68288	0.0277376
B52	CG1486	0.29925	1.52783	0.651027	1.36702	1.21706	421.083	411.026	561.882	416.973	411.026	500.241	0.0780331
B52	CG14868	0.132191	4.6246	1.92235	2.61357	1.91582	34.0524	30.7451	80.3545	32.6223	30.7451	58.9021	0.040692
B52	CG14894	0.00189278	29.4461	32.1847	4.10703	4.33732	135.185	111.988	459.94	136.904	111.988	485.729	0.000943459
B52	CG14905	0.628368	0.793267	0.286683	6.82168	3.88443	0.610111	0.439526	2.9983	0.524045	0.439526	1.70731	0.140752
B52	CG14906	0.0283864	3.54637	3.07281	1.68269	1.62977	199.336	190.659	320.818	198.663	190.659	310.73	0.0113586
B52	CG14921	0.00114735	42.871	44.6679	10.0234	10.2839	42.5419	26.5629	266.249	43.0033	26.5629	273.169	0.000590135
B52	CG14937	0.0524111	2.29234	1.73579	4.35433	4.0109	2.86471	2.34117	10.1942	2.8111	2.34117	9.39019	0.0191781
B52	CG14949	0.198011	3.07561	1.25887	3.94763	2.57569	8.72421	7.29139	28.7837	8.05732	7.29139	18.7804	0.0558872
B52	CG14961	0.00289024	22.8137	21.5196	4.76298	4.70431	48.3477	38.6514	184.096	48.1965	38.6514	181.828	0.00141869
B52	CG14964	0.0172304	4.93449	5.34816	1.91609	1.95459	186.293	175.571	336.41	186.744	175.571	343.169	0.00730037
B52	CG14967	0.0575894	1.54289	1.58337	1.41011	1.40472	391.448	381.03	537.296	391.311	381.03	535.241	0.02078
B52	CG14977	1	0.0274353	0.767041	1.01484	1.37334	47.9096	47.8622	48.5725	49.0535	47.8622	65.7313	0.324458
B52	CG14982	0.141875	1.77019	0.937604	1.64905	1.44847	71.3225	68.3644	112.736	70.4083	68.3644	99.0238	0.0430621
B52	CG14985	0.0176145	6.38056	4.96774	2.5096	2.2911	72.5864	65.9493	165.506	71.6258	65.9493	151.097	0.00744706
B52	CG14995	0.10745	0.915761	1.33772	1.38579	1.50148	79.8933	77.8901	107.939	80.4941	77.8901	116.951	0.0345338
B52	CG15011	0.00604324	13.5974	12.0349	2.75741	2.64436	127.307	113.955	314.222	126.448	113.955	301.34	0.00281118
B52	CG15014	0.0142366	5.85475	7.49066	1.98114	2.18551	113.191	106.242	210.481	114.639	106.242	232.194	0.00613209
B52	CG15019	0.00158879	32.8953	41.495	3.86484	4.32134	619.236	519.935	2009.46	635.06	519.935	2246.82	0.000797323
B52	CG15027	0.012935	6.55871	6.52138	2.32224	2.35766	72.4947	66.622	154.712	72.6521	66.622	157.072	0.00564455
B52	CG1503	0.00451447	15.4445	15.6859	4.26051	4.42246	41.1223	33.7797	143.919	41.487	33.7797	149.389	0.00214222
B52	CG15073	0.00947133	8.91741	8.38922	3.77601	3.69752	32.5583	27.4738	103.741	32.4145	27.4738	101.585	0.00425474
B52	CG15087	0.999986	0.0343983	0.334632	1.09381	1.28461	44.1327	43.8584	47.9729	44.6906	43.8584	56.3411	0.298377
B52	CG15097	0.0344665	2.94895	2.54037	1.62967	1.5784	251.901	241.753	393.977	251.075	241.753	381.583	0.0134764
B52	CG15099	0.0406747	2.30252	3.05208	1.55019	1.62386	743.891	717.571	1112.37	747.416	717.571	1165.24	0.0155426
B52	CG15107	0.00262938	22.5189	26.7235	4.37755	4.91108	76.0272	62.0545	271.646	78.2344	62.0545	304.754	0.00130134
B52	CG15117	0.0297561	3.15528	2.96695	1.81566	1.78024	120.836	114.604	208.082	120.566	114.604	204.023	0.0118047
B52	CG15118	0.256388	0.43273	0.27763	1.13372	1.1034	209.189	207.341	235.067	208.77	207.341	228.779	0.0688872
B52	CG1513	0.00316178	20.3167	20.8381	2.79986	2.76543	668.291	596.693	1670.65	666.921	596.693	1650.11	0.00154971
B52	CG1516	0.995952	0.915961	0.155187	1.27784	1.07297	122.36	120.135	153.513	120.72	120.135	128.902	0.258286
B52	CG15160	0.0183414	4.77328	4.82797	1.88551	1.91345	136.072	128.486	242.263	136.311	128.486	245.852	0.00771576
B52	CG15170	0.85196	0.027852	0.0718734	1.32294	1.50663	2.31518	2.26639	2.9983	2.34294	2.26639	3.41461	0.184681
B52	CG1518	0.0314995	2.81255	3.04564	1.76191	1.78545	419.506	399.227	703.402	420.132	399.227	712.801	0.0124653
B52	CG15186	0.217774	0.349539	0.280069	1.61643	1.56892	8.49695	8.16155	13.1925	8.4711	8.16155	12.8048	0.0603068
B52	CG15196	0.0143218	5.90649	7.85554	3.03117	3.70532	20.665	18.2005	55.1688	21.483	18.2005	67.4386	0.00617549
B52	CG1523	0.0542357	2.06097	1.64063	1.45932	1.41771	125.356	121.632	177.5	125.019	121.632	172.438	0.0197442
B52	CG15236	0.963462	0.0536386	0.186017	1.61555	2.29983	1.15924	1.11354	1.79898	1.21004	1.11354	2.56096	0.222431
B52	CG15237	0.0200769	9.64236	5.71161	3.51679	2.76502	47.5905	40.7528	143.319	45.5481	40.7528	112.682	0.00836714
B52	CG1529	0.00789872	9.77206	10.1111	2.29564	2.32122	223.335	205.578	471.933	223.686	205.578	477.192	0.00361132
B52	CG15312	0.0187305	4.625	4.82247	3.12144	3.2438	21.928	19.211	59.9661	22.0847	19.211	62.3167	0.00787696
B52	CG1532	0.0540253	1.96171	2.97766	1.5116	1.73433	82.4573	79.7377	120.532	83.6413	79.7377	138.292	0.0196709
B52	CG15332	0.329755	0.271235	0.172878	1.36191	1.29251	22.9975	22.4557	30.5827	22.8936	22.4557	29.0242	0.0843262
B52	CG15365	0.192285	0.693408	1.26143	2.63141	3.74597	3.03205	2.73463	7.19593	3.23525	2.73463	10.2438	0.0547014
B52	CG15432	0.00227635	25.279	28.5628	5.51825	5.97667	62.0752	47.7055	263.251	63.5332	47.7055	285.12	0.00112855
B52	CG15440	0.0854805	0.989552	1.06747	1.35779	1.39968	104.906	102.462	139.121	105.192	102.462	143.414	0.0288062
B52	CG15445	0.065222	1.67971	2.61888	1.65208	1.87013	62.873	60.2537	99.5437	63.7489	60.2537	112.682	0.0230276
B52	CG15473	0.0748336	1.59727	2.65235	3.82709	5.75076	3.35196	2.82039	10.7939	3.71366	2.82039	16.2194	0.0257883
B52	CG15478	0.0493551	1.89925	2.52931	1.40195	1.4959	236.725	230.547	323.217	238.169	230.547	344.876	0.0182543
B52	CG1550	0.738619	0.42732	0.15378	1.21214	1.11582	141.984	140.004	169.704	141.085	140.004	156.219	0.160678
B52	CG15514	0.0157892	6.39016	5.35939	1.97423	1.87805	205.728	193.181	381.384	204.489	193.181	362.803	0.00674496
B52	CG15523	0.0304056	3.31712	2.87217	1.91719	1.8167	216.403	203.933	390.979	215.037	203.933	370.486	0.0120506
B52	CG15539	0.0339845	3.81733	2.76562	15.3579	12.146	1.37556	0.702825	10.7939	1.22507	0.702825	8.53653	0.0132971
B52	CG15547	0.00954246	8.94944	8.31691	6.17881	6.07337	10.9669	8.15229	50.3715	10.9096	8.15229	49.5119	0.00428446
B52	CG15556	0.638607	0.0545518	0.0983979	1.14201	1.62572	0.530063	0.525092	0.599661	0.546996	0.525092	0.853653	0.142731
B52	CG15561	0.0312333	2.97498	3.95984	1.92189	2.0858	267.604	252.109	484.526	270.359	252.109	525.85	0.0123591
B52	CG15564	0.316185	0.44353	0.252149	2.14812	1.83479	1.50261	1.39578	2.9983	1.47346	1.39578	2.56096	0.0814122
B52	CG15599	0.914355	0.989095	0.250213	5.34716	3.0448	0.723233	0.560728	2.9983	0.637167	0.560728	1.70731	0.202127
B52	CG15602	0.00833496	9.08665	11.1938	2.47257	2.75336	92.9505	84.6412	209.282	94.5349	84.6412	233.047	0.00380252
B52	CG1561	0.0487618	1.86951	1.83783	4.02563	4.22265	3.40114	2.83025	11.3936	3.43831	2.83025	11.9511	0.0180589
B52	CG15618	0.0410202	2.19052	2.25017	1.66553	1.69356	152.663	146.177	243.462	152.936	146.177	247.559	0.0156597
B52	CG15628	1	0.144159	0.00542851	1.45918	1.21172	5.08245	4.93148	7.19593	5.00109	4.93148	5.97557	0.317733
B52	CG15661	0.999998	0.512101	0.040969	5.38824	1.91762	0.575395	0.445163	2.39864	0.472395	0.445163	0.853653	0.306021
B52	CG15673	0.975569	1.16587	0.237397	1.83795	1.30821	19.2916	18.2709	33.581	18.6463	18.2709	23.9023	0.230732
B52	CG15701	0.071772	1.358	1.17828	1.89197	1.85621	24.8491	23.4544	44.3749	24.7932	23.4544	43.5363	0.0248912
B52	CG15715	0.0382757	2.31868	2.536	1.486	1.51211	343.291	332.518	494.12	343.87	332.518	502.802	0.0147694
B52	CG15719	0.995879	0.254961	1.48487	6.13707	34.946	0.131175	0.0977113	0.599661	0.318838	0.0977113	3.41461	0.258076
B52	CG15725	0.976907	0.292519	0.0673875	1.76879	1.37344	3.92039	3.72925	6.59627	3.8221	3.72925	5.12192	0.232069
B52	CG15735	0.999576	0.555409	0.076375	1.23813	1.08255	159.414	156.923	194.29	157.786	156.923	169.877	0.27966
B52	CG15747	0.000478157	80.8893	79.57	13.23	12.4604	81.2117	44.7365	591.865	78.9164	44.7365	557.436	0.000260147
B52	CG15771	0.0635444	1.46324	1.93912	1.26758	1.37762	134.342	131.988	167.305	135.31	131.988	181.828	0.0225351
B52	CG1578	0.00241122	26.3675	24.8536	3.89937	3.79425	126.988	106.419	414.965	126.242	106.419	403.778	0.0011953
B52	CG15784	0.00151267	35.6779	36.4314	3.36829	3.27111	14299.9	12350	41598.5	14219.9	12350	40398.3	0.000763549
B52	CG15814	0.0346232	2.56236	2.76509	1.65228	1.69292	118.916	113.96	188.293	119.224	113.96	192.926	0.0135316
B52	CG15818	0.348194	0.182256	0.128974	1.47573	1.40052	10.0617	9.75238	14.3919	10.0128	9.75238	13.6585	0.0877809
B52	CG1582	0.00342609	19.2285	19.4583	2.9645	2.9411	282.306	249.614	739.981	281.916	249.614	734.142	0.00166712
B52	CG15822	0.347445	0.516572	0.26932	2.69633	2.09367	2.72305	2.44639	6.59627	2.62476	2.44639	5.12192	0.0876296
B52	CG15864	0.132575	0.917956	1.56822	2.44025	3.17178	6.19463	5.65195	13.7922	6.47027	5.65195	17.9267	0.0407981
B52	CG15865	0.0482789	2.32804	1.84736	10.3673	8.54435	1.7853	1.09899	11.3936	1.65174	1.09899	9.39019	0.0179261
B52	CG15877	0.0155714	5.60962	5.54776	1.83867	1.83537	285.83	270.695	497.718	285.77	270.695	496.826	0.00666828
B52	CG15878	0.61392	0.45879	1.30796	2.25975	3.93176	2.58887	2.38829	5.39695	2.85509	2.38829	9.39019	0.138048
B52	CG15894	0.0546238	2.84323	1.87861	3.43434	2.87588	10.3501	8.90496	30.5827	10.0186	8.90496	25.6096	0.0198709
B52	CG15896	0.148296	1.90157	0.975678	2.05103	1.67951	35.3528	33.0379	67.7617	34.5345	33.0379	55.4875	0.0445263
B52	CG15908	0.0234607	3.72604	4.54079	2.11773	2.32715	52.0287	48.4206	102.542	52.7047	48.4206	112.682	0.00962586
B52	CG15930	0.0633336	1.53451	2.14226	3.34796	4.14436	4.76443	4.11959	13.7922	4.98315	4.11959	17.0731	0.0224679
B52	CG1597	0.0978376	1.10491	0.848546	1.30698	1.27108	141.865	139.02	181.697	141.533	139.02	176.706	0.0320598
B52	CG1598	0.324358	0.363909	0.214082	1.05799	1.03857	240.111	239.187	253.057	239.802	239.187	248.413	0.0832101
B52	CG1602	0.991005	0.18496	0.901786	1.24756	1.65135	27.8502	27.398	34.1807	28.5877	27.398	45.2436	0.247528
B52	CG1620	0.000806113	55.4701	57.1205	5.08458	4.9862	389.685	306.282	1557.32	387.676	306.282	1527.19	0.000423958
B52	CG1622	0.0121368	6.71512	7.12638	2.26834	2.34179	101.21	93.3196	211.68	101.667	93.3196	218.535	0.00534213
B52	CG1632	0.171956	0.420245	0.404511	3.54875	3.78889	0.790761	0.675912	2.39864	0.801582	0.675912	2.56096	0.0500039
B52	CG1646	0.000500033	76.2955	83.0786	6.07061	6.1418	574.292	429.204	2605.53	576.329	429.204	2636.08	0.000273081
B52	CG1648	0.96915	0.593217	0.136829	1.6656	1.18554	6.76804	6.48048	10.7939	6.56064	6.48048	7.68288	0.22636
B52	CG1657	0.0126655	8.53562	6.6818	2.08193	1.92118	295.837	275.934	574.475	292.879	275.934	530.119	0.00553768
B52	CG1662	0.24862	0.333946	0.494799	1.17564	1.22843	153.265	151.491	178.099	153.798	151.491	186.096	0.0671657
B52	CG1665	0.454548	2.38455	0.794637	1.80395	1.40714	51.1338	48.5327	87.5505	49.85	48.5327	68.2923	0.109234
B52	CG16710	0.0140101	6.42997	5.95722	11.5244	11.2249	3.36462	1.9773	22.7871	3.32514	1.9773	22.195	0.00603907
B52	CG16711	0.0796947	1.10023	1.32662	1.36999	1.39905	395.136	385.624	528.301	395.883	385.624	539.509	0.0272249
B52	CG16721	0.0409604	3.99795	2.57615	2.03632	1.79155	73.355	68.6146	139.721	72.2353	68.6146	122.926	0.0156373
B52	CG16734	0.173624	1.97662	5.24316	1.85159	2.78734	29.7757	28.176	52.1705	31.5334	28.176	78.5361	0.0503654
B52	CG16736	0.124457	0.713013	0.610833	2.5107	2.4253	7.36112	6.68759	16.7905	7.32304	6.68759	16.2194	0.0388014
B52	CG16742	0.0120073	6.7571	7.22569	2.44397	2.55137	64.5559	58.8871	143.919	64.9775	58.8871	150.243	0.00528821
B52	CG16753	0.00227668	25.8079	27.0638	3.23182	3.2722	580.212	505.064	1632.28	581.572	505.064	1652.67	0.00112905
B52	CG16762	0.346633	0.32109	0.188214	2.19815	1.87752	1.47296	1.36401	2.9983	1.44381	1.36401	2.56096	0.0874966
B52	CG1677	0.00182405	33.6447	30.5821	3.45878	3.2136	711.117	610.968	2113.2	701.13	610.968	1963.4	0.000910022
B52	CG16771	0.732647	0.223405	0.0879812	1.11156	1.06297	427.181	424.028	471.333	425.808	424.028	450.729	0.159486
B52	CG16772	0.650938	0.133449	0.281559	1.83481	2.61196	1.03504	0.980474	1.79898	1.08584	0.980474	2.56096	0.144761
B52	CG16787	0.452146	1.17881	0.45714	1.42102	1.23866	119.739	116.47	165.506	118.324	116.47	144.267	0.108831
B52	CG16789	0.0284362	3.54201	5.33881	3.69203	4.91306	8.8122	7.47133	27.5844	9.42038	7.47133	36.7071	0.0113673
B52	CG16791	0.130395	1.13652	2.11743	1.33798	1.48317	279.551	273.391	365.793	282.197	273.391	405.485	0.0402671
B52	CG16812	0.0438429	2.0852	2.06162	1.46817	1.47696	189.534	183.798	269.847	189.642	183.798	271.462	0.0165396
B52	CG16817	0.0112469	7.00887	8.34309	1.76649	1.83968	2424.53	2306.66	4074.69	2435.79	2306.66	4243.51	0.00497501
B52	CG16863	0.0297376	2.97126	3.24979	2.40684	2.59168	21.2562	19.4336	46.7735	21.4957	19.4336	50.3655	0.0118003
B52	CG16865	0.0215411	5.59369	4.17942	3.14872	2.79728	28.9577	25.3293	79.7549	28.3642	25.3293	70.8532	0.00893213
B52	CG16890	0.024828	5.91822	3.98233	3.52045	2.95921	20.8906	17.8853	62.9644	20.2214	17.8853	52.9265	0.0101023
B52	CG16896	0.149133	1.69403	0.893247	1.60292	1.415	69.6565	66.9649	107.339	68.8176	66.9649	94.7555	0.0447017
B52	CG16903	0.250952	1.79229	0.778226	1.41394	1.24375	145.996	142.075	200.886	144.384	142.075	176.706	0.0677479
B52	CG16908	0.0194514	4.41522	5.4552	2.16225	2.36892	60.9594	56.5757	122.331	61.7389	56.5757	134.024	0.00812682
B52	CG16935	0.029532	4.06899	3.07623	1.83373	1.72941	82.8463	78.4839	143.919	82.3004	78.4839	135.731	0.0117334
B52	CG16940	0.328566	0.604795	1.36064	1.20183	1.36367	171.928	169.645	203.885	173.758	169.645	231.34	0.0840835
B52	CG16941	0.000790408	55.2717	60.4407	5.60174	5.89169	178.359	136.487	764.567	180.998	136.487	804.141	0.000416092
B52	CG1695	0.0607001	1.69899	1.43496	2.54252	2.51787	5.98245	5.42461	13.7922	5.97353	5.42461	13.6585	0.0217325
B52	CG16972	0.282509	0.275666	0.402923	1.14698	1.17123	722.749	715.735	820.935	723.906	715.735	838.288	0.0744597
B52	CG16974	0.0164187	5.31176	5.31152	1.7659	1.75543	440.078	418.699	739.382	439.786	418.699	734.996	0.00699375
B52	CG16985	1	0.0239023	1.52758	1.32062	3.75997	4.6378	4.54075	5.99661	5.37623	4.54075	17.0731	0.332386
B52	CG16989	0.0639869	1.36764	1.45938	1.51727	1.57709	51.5155	49.7982	75.5572	51.7141	49.7982	78.5361	0.0226595
B52	CG17002	0.0316981	3.12297	2.76562	2.31324	2.17957	78.3751	72.0658	166.706	77.7329	72.0658	157.072	0.0125192
B52	CG17019	0.0217918	4.08851	4.086	1.66267	1.66878	291.107	278.791	463.538	291.221	278.791	465.241	0.00902541
B52	CG17029	0.038105	2.32804	2.56434	2.08681	2.22802	27.1197	25.2875	52.7701	27.3577	25.2875	56.3411	0.0147011
B52	CG1703	8.64255e-05	239.451	278.009	15.6764	16.5341	1442.91	729.322	11433.1	1484.61	729.322	12058.7	8.64255e-05
B52	CG17032	0.115615	1.22414	2.22752	3.22147	4.93872	2.77827	2.41989	7.79559	3.05531	2.41989	11.9511	0.0365347
B52	CG17059	0.556415	0.226513	0.108553	1.07392	1.02741	104.372	103.86	111.537	104.05	103.86	106.707	0.12808
B52	CG1707	0.0262267	3.89956	3.31186	2.16769	2.07748	75.7353	70.2654	152.314	75.3127	70.2654	145.975	0.0106041
B52	CG17075	0.486319	0.311462	0.152856	1.21326	1.05131	11.5295	11.3678	13.7922	11.4067	11.3678	11.9511	0.114764
B52	CG17118	0.916074	0.00646757	0.0221823	1.46792	1.56726	1.68501	1.63404	2.39864	1.69583	1.63404	2.56096	0.202722
B52	CG17168	0.00171221	32.8409	32.8841	4.96566	4.95364	100.011	79.0988	392.778	99.9473	79.0988	391.827	0.000857262
B52	CG17173	0.995212	0.561911	0.101515	3.03081	1.72582	1.12321	0.989274	2.9983	1.03714	0.989274	1.70731	0.256236
B52	CG1718	0.0699098	1.28925	1.23995	1.39256	1.38035	263.365	256.649	357.398	263.157	256.649	354.266	0.024358
B52	CG17180	0.0521707	2.56367	1.82499	2.22269	1.99421	34.722	32.105	71.3596	34.2329	32.105	64.024	0.0190909
B52	CG17186	0.00604103	11.915	13.2376	2.984	3.197	87.3748	77.168	230.27	88.4705	77.168	246.706	0.00281057
B52	CG17202	0.0113169	11.2286	7.84592	2.77815	2.418	93.1943	83.3176	231.469	91.1939	83.3176	201.462	0.00499997
B52	CG17209	0.101148	4.24036	1.95539	1.70789	1.43629	214.726	205.049	350.202	211.013	205.049	294.51	0.032938
B52	CG17230	0.0148761	9.59032	6.44499	3.35184	2.82675	43.6676	37.7489	126.528	42.3461	37.7489	106.707	0.00637968
B52	CG17233	0.0378208	2.38148	2.9448	1.43652	1.50075	479.42	465.863	669.221	481.415	465.863	699.142	0.0146203
B52	CG17249	0.003051	20.7796	21.3908	4.04963	4.12795	86.5972	71.9659	291.435	86.9729	71.9659	297.071	0.00149872
B52	CG17258	0.0650074	1.46857	1.31806	2.87597	2.9055	7.27212	6.46373	18.5895	7.28484	6.46373	18.7804	0.0229488
B52	CG17259	0.00107192	46.7234	46.2064	4.27942	4.10864	652.482	535.424	2291.3	646.386	535.424	2199.86	0.00055175
B52	CG17264	0.999062	0.426753	0.0642424	1.14873	1.04157	419.647	415.527	477.33	416.679	415.527	432.802	0.273238
B52	CG17265	0.115971	3.21084	1.53791	1.92986	1.60022	64.018	60.2811	116.334	62.6932	60.2811	96.4628	0.0366311
B52	CG17294	0.101561	1.24033	0.872061	1.31351	1.25394	315.532	309.072	405.97	314.304	309.072	387.559	0.0330442
B52	CG17321	0.260987	0.21963	0.243308	1.33926	1.42989	7.32611	7.16408	9.59457	7.3694	7.16408	10.2438	0.0698015
B52	CG17329	0.115868	0.771898	1.04005	6.41885	9.13762	0.381513	0.280265	1.79898	0.432312	0.280265	2.56096	0.036592
B52	CG17337	0.0336918	2.80099	3.79255	1.55738	1.64044	545.116	525.586	818.537	548.026	525.586	862.19	0.0132104
B52	CG17352	0.0476858	1.90598	2.41376	3.25631	3.73419	7.62675	6.62953	21.5878	7.83796	6.62953	24.7559	0.0177685
B52	CG17360	0.0453446	2.12429	1.93707	1.54934	1.54026	97.0943	93.6641	145.118	97.0376	93.6641	144.267	0.0169998
B52	CG17361	0.0210263	4.18684	4.28337	3.31857	3.32912	31.0858	26.9241	89.3494	31.1047	26.9241	89.6336	0.00875761
B52	CG1737	0.038864	4.64322	2.86395	1.67359	1.49277	625.621	598.734	1002.03	618.404	598.734	893.775	0.0149692
B52	CG1738	0.11937	0.718086	0.914853	1.27093	1.31785	194.541	191.09	242.863	195.139	191.09	251.828	0.0375063
B52	CG17385	0.117406	0.961184	0.707991	1.2599	1.22078	207.724	204.186	257.254	207.191	204.186	249.267	0.0369636
B52	CG17470	0.999737	0.405006	0.0527581	1.43323	1.08816	12.9144	12.5519	17.9898	12.6257	12.5519	13.6585	0.283168
B52	CG1749	0.00830185	9.35871	9.71754	3.03897	3.09791	71.0543	62.5516	190.092	71.3001	62.5516	193.779	0.0037887
B52	CG17494	0.280024	0.879026	2.10195	1.39355	1.66567	724.227	705.711	983.443	737.029	705.711	1175.48	0.0739132
B52	CG17549	0.999506	0.196615	1.43298	1.19107	1.74471	35.1815	34.739	41.3766	36.4637	34.739	60.6094	0.278307
B52	CG17565	0.419104	0.0728004	0.0780416	1.06865	1.07465	316.803	315.36	337.009	316.93	315.36	338.9	0.102376
B52	CG17593	0.0818893	1.10003	1.40661	1.40023	1.44466	222.041	216.271	302.829	222.682	216.271	312.437	0.027835
B52	CG17597	0.366015	0.736441	0.344985	1.54467	1.35023	22.9316	22.1281	34.1807	22.6447	22.1281	29.8779	0.0915426
B52	CG17598	0.052924	2.72815	5.11377	1.491	1.71772	564.048	546.17	814.339	572.303	546.17	938.165	0.0193316
B52	CG17666	0.867911	0.356835	1.27178	1.54723	2.38613	9.64102	9.30168	14.3919	10.1612	9.30168	22.195	0.188431
B52	CG1774	0.831418	0.0607803	0.0225307	1.22064	1.15844	7.47741	7.36902	8.99491	7.44685	7.36902	8.53653	0.1802
B52	CG17760	0.999998	0.00363239	0.069259	1.01484	1.09245	502.163	501.667	509.112	504.758	501.667	548.045	0.305015
B52	CG17764	0.9989	1.93319	0.257698	7.25889	2.58337	1.40497	0.991327	7.19593	1.09597	0.991327	2.56096	0.271825
B52	CG17765	0.272397	0.26458	0.197583	1.08969	1.07596	719.117	714.843	778.959	718.463	714.843	769.142	0.0721892
B52	CG17776	0.00118461	44.2656	42.2943	8.84096	8.22678	87.3775	57.3821	507.313	85.028	57.3821	472.07	0.000609916
B52	CG17786	0.997458	0.117012	0.633158	1.22008	1.56317	29.9223	29.4897	35.9796	30.5968	29.4897	46.0973	0.263633
B52	CG17802	0.155483	0.490808	0.460237	1.2722	1.26068	184.765	181.472	230.869	184.626	181.472	228.779	0.0462241
B52	CG17803	0.0828623	2.02976	4.04299	3.36245	4.98202	10.115	8.73869	29.3834	11.0585	8.73869	43.5363	0.0280921
B52	CG17806	0.0125891	7.16045	10.9597	3.12496	4.1262	30.2328	26.4814	82.7532	32.0005	26.4814	109.268	0.00551401
B52	CG17807	0.351656	0.421802	0.228633	1.2762	1.19583	37.8041	37.1205	47.3732	37.6052	37.1205	44.39	0.0885954
B52	CG17841	0.18695	0.375964	0.431146	1.20207	1.20463	510.633	503.846	605.657	510.719	503.846	606.948	0.0535082
B52	CG1785	0.000278318	116.798	123.526	10.3503	10.1217	310.653	191.365	1980.68	307.737	191.365	1936.94	0.000161155
B52	CG1789	0.000957504	48.0413	56.6748	10.0674	11.0261	116.023	72.3113	727.988	120.645	72.3113	797.312	0.00049493
B52	CG17917	0.91798	0.171212	0.5713	1.77961	3.16674	1.4179	1.34784	2.39864	1.54254	1.34784	4.26827	0.203329
B52	CG17919	0.56001	0.154321	0.30125	1.49802	1.75619	7.03109	6.80515	10.1942	7.14822	6.80515	11.9511	0.128807
B52	CG1792	0.207221	0.315809	0.337703	1.13343	1.19622	61.9176	61.3717	69.5606	62.1745	61.3717	73.4142	0.0579148
B52	CG17930	0.357976	0.363035	0.20279	1.45764	1.24502	6.35914	6.17087	8.99491	6.27167	6.17087	7.68288	0.0897815
B52	CG17974	0.689201	0.307719	0.836994	1.70422	2.42606	5.15742	4.92615	8.39525	5.39448	4.92615	11.9511	0.151594
B52	CG17982	0.0123731	7.87606	6.65579	4.32241	4.10214	14.7432	12.0698	52.1705	14.5659	12.0698	49.5119	0.00542885
B52	CG17985	0.462023	3.31321	1.03237	1.84094	1.40945	81.8714	77.5251	142.719	79.6413	77.5251	109.268	0.110536
B52	CG17991	0.116005	0.736732	0.669453	3.72272	3.78537	1.33224	1.12757	4.19762	1.33695	1.12757	4.26827	0.0366389
B52	CG18004	0.0528824	5.67929	2.90564	2.23249	1.82018	63.9488	59.0934	131.925	62.3245	59.0934	107.56	0.0193193
B52	CG1801	0.0310373	2.89646	3.5693	5.57172	6.71143	3.65113	2.79827	15.5912	3.86374	2.79827	18.7804	0.0122897
B52	CG18011	0.486712	0.598665	1.62276	1.25934	1.49516	119.648	117.614	148.116	121.497	117.614	175.853	0.114836
B52	CG18012	0.667506	1.01446	0.339513	1.40026	1.21084	106.402	103.636	145.118	105.093	103.636	125.487	0.14737
B52	CG18031	0.976874	0.997061	0.2067	6.07811	2.59577	1.32059	0.98659	5.99661	1.09155	0.98659	2.56096	0.232017
B52	CG18048	0.0666503	2.16046	1.48033	1.66302	1.54331	59.4909	56.9726	94.7464	59.0362	56.9726	87.9263	0.0233936
B52	CG18081	0.00157077	33.7863	45.0076	5.02328	5.94005	113.546	89.5322	449.745	119.018	89.5322	531.826	0.000789943
B52	CG18088	0.999754	0.00306437	0.0367797	1.13574	1.1583	35.6956	35.3755	40.1773	35.7488	35.3755	40.9754	0.283691
B52	CG1812	0.959375	0.135088	0.0345782	1.06998	1.02917	124.999	124.418	133.125	124.66	124.418	128.048	0.220064
B52	CG1814	0.0390013	2.69261	2.24967	1.81275	1.74095	72.8837	69.1376	125.329	72.5528	69.1376	120.365	0.0150076
B52	CG18171	0.131451	4.19583	1.79415	10.5058	5.85222	2.14477	1.31281	13.7922	1.73749	1.31281	7.68288	0.0405204
B52	CG18178	0.0134467	6.3351	6.30062	1.90281	1.88989	362.513	341.933	650.632	362.218	341.933	646.216	0.00583195
B52	CG18180	0.118579	0.739733	0.648163	6.16545	5.85126	0.784529	0.583569	3.59796	0.772305	0.583569	3.41461	0.0372674
B52	CG18190	0.256688	0.397959	0.658469	1.1673	1.24484	298.163	294.874	344.205	299.687	294.874	367.071	0.0689347
B52	CG18262	0.558589	0.300476	0.705994	1.14887	1.32573	69.5824	68.8986	79.1552	70.3947	68.8986	91.3409	0.12854
B52	CG1827	0.0437815	2.9908	2.15183	2.11218	1.91185	52.7574	49.1157	103.741	52.1015	49.1157	93.9019	0.016519
B52	CG18273	0.599863	0.335999	0.852233	1.18081	1.35976	80.6916	79.7305	94.1467	81.6427	79.7305	108.414	0.135738
B52	CG18281	0.999996	0.47261	0.0410476	3.45453	1.63924	1.21195	1.04152	3.59796	1.08591	1.04152	1.70731	0.302589
B52	CG18327	0.984126	0.0347958	0.00719146	1.34424	1.27574	2.738	2.67657	3.59796	2.72578	2.67657	3.41461	0.238975
B52	CG18428	0.0036413	18.3202	25.7097	5.46426	7.06615	37.3097	28.7525	157.111	40.3803	28.7525	203.169	0.00177006
B52	CG18472	0.871807	0.0311981	0.0836077	1.55738	2.21703	0.399352	0.385044	0.599661	0.416285	0.385044	0.853653	0.189374
B52	CG18476	0.0272406	3.25246	3.42896	2.40078	2.45644	34.9572	31.9715	76.7566	35.0758	31.9715	78.5361	0.0109727
B52	CG18507	0.276941	0.272367	0.197583	2.95568	2.80506	0.688009	0.608653	1.79898	0.681897	0.608653	1.70731	0.0732336
B52	CG18519	0.224793	0.310597	0.261125	1.3969	1.37671	17.1849	16.7419	23.3868	17.1623	16.7419	23.0486	0.0618561
B52	CG18522	0.00794474	11.0867	9.56785	2.06094	1.94209	1476.41	1378.88	2841.79	1465.49	1378.88	2677.91	0.00362437
B52	CG18530	0.475576	0.649937	1.77926	3.80302	8.66212	0.935728	0.788402	2.9983	1.19112	0.788402	6.82923	0.112952
B52	CG18547	0.00424395	17.3864	15.9179	3.53536	3.45557	69.5989	59.5359	210.481	69.2822	59.5359	205.73	0.00202679
B52	CG18557	0.00480727	17.0108	14.3829	3.1087	2.89996	122.548	107.444	334.011	121.053	107.444	311.583	0.00227842
B52	CG18568	0.999673	0.0844785	0.577926	1.28468	1.98122	5.70765	5.60134	7.19593	5.96775	5.60134	11.0975	0.281746
B52	CG18596	0.826528	0.176935	0.503988	1.09915	1.17807	615.622	611.579	672.22	618.839	611.579	720.483	0.17913
B52	CG18605	0.652894	0.0768273	0.150948	1.26866	1.35452	13.4718	13.2348	16.7905	13.5476	13.2348	17.9267	0.145033
B52	CG18619	0.835544	0.422594	1.50756	1.22325	1.48082	399.007	393.156	480.928	405.758	393.156	582.192	0.181019
B52	CG18643	0.490907	0.419155	1.0197	1.34344	2.13895	34.7001	33.9234	45.5742	36.4992	33.9234	72.5605	0.115694
B52	CG1868	0.00768338	9.76092	10.9272	2.78743	3.01123	67.896	60.6668	169.104	68.8011	60.6668	182.682	0.00352297
B52	CG18808	0.985609	0.159394	0.705994	1.86473	3.53941	2.04071	1.92948	3.59796	2.25613	1.92948	6.82923	0.240631
B52	CG18809	0.0303931	3.07961	2.90968	1.86998	1.87103	59.3734	56.1186	104.941	59.3773	56.1186	104.999	0.0120483
B52	CG18815	0.0636108	1.37144	1.51964	1.37511	1.40779	170.302	166.147	228.471	170.664	166.147	233.901	0.0225627
B52	CG18869	0.642314	0.660393	0.241705	3.35946	2.0496	1.44604	1.24949	4.19762	1.33692	1.24949	2.56096	0.143318
B52	CG1888	0.0167716	5.22853	5.18827	2.77476	2.761	47.3698	42.3581	117.533	47.3309	42.3581	116.951	0.0071416
B52	CG1910	0.0279442	3.27026	4.30229	1.54555	1.61656	1508.29	1455.36	2249.33	1515.18	1455.36	2352.67	0.0112113
B52	CG1965	0.00541247	13.5556	13.5139	2.58448	2.58384	201.635	182.37	471.333	201.627	182.37	471.217	0.002528
B52	CG1968	0.0240776	4.08218	3.58698	1.78254	1.73559	150.079	142.637	254.256	149.632	142.637	247.559	0.00983802
B52	CG1970	0.00676859	10.7989	12.3572	2.06857	2.1994	399.98	373.381	772.363	403.236	373.381	821.215	0.00311887
B52	CG2006	0.536411	0.424289	1.08714	1.41705	1.80858	25.2265	24.5441	34.7803	25.8672	24.5441	44.39	0.124404
B52	CG2017	0.0586226	1.90745	1.51646	1.38491	1.34237	260.247	253.736	351.401	259.528	253.736	340.608	0.021128
B52	CG2021	0.0108826	7.80221	11.3625	2.30434	2.76368	77.2208	71.0432	163.707	79.3963	71.0432	196.34	0.00484177
B52	CG2025	0.414422	0.564778	1.39296	1.15107	1.30747	302.042	299.03	344.205	305.16	299.03	390.973	0.10147
B52	CG2034	0.340108	0.204942	0.304647	1.06231	1.10599	265.844	264.744	281.241	266.615	264.744	292.803	0.0863767
B52	CG2046	0.603772	0.117874	0.227703	1.1675	1.21229	88.2916	87.3165	101.942	88.5523	87.3165	105.853	0.136304
B52	CG2063	0.0720414	1.45722	1.18747	1.34952	1.31392	342.392	334.596	451.544	341.598	334.596	439.631	0.0249642
B52	CG2064	0.0068409	10.7753	11.904	2.15675	2.19483	733.129	680.641	1467.97	734.858	680.641	1493.89	0.00315285
B52	CG2065	0.0759917	1.94791	1.30394	1.60223	1.47368	119.902	115.274	184.695	118.914	115.274	169.877	0.0261143
B52	CG2100	0.107454	1.13934	1.91235	1.45006	1.69564	47.7063	46.3166	67.162	48.4646	46.3166	78.5361	0.0345363
B52	CG2107	0.00438781	19.8946	15.6402	3.03364	2.69224	264.65	233.053	707	259.345	233.053	627.435	0.00209033
B52	CG2116	0.00428193	16.2804	16.1568	4.21836	4.19748	119.305	98.2291	414.366	119.168	98.2291	412.315	0.00203687
B52	CG2120	0.995185	0.552425	0.0999721	2.65213	1.61806	1.75706	1.58274	4.19762	1.64795	1.58274	2.56096	0.256162
B52	CG2124	0.45747	0.616004	1.63458	1.47855	1.91632	28.0403	27.1734	40.1773	28.8333	27.1734	52.0729	0.109774
B52	CG2137	0.021344	9.65096	5.5958	7.7046	5.36477	10.3611	7.1605	55.1688	9.24409	7.1605	38.4144	0.00886488
B52	CG2162	0.0671822	1.74691	1.33112	1.34496	1.29088	684.623	669.232	900.091	682.21	669.232	863.897	0.0235294
B52	CG2182	0.000614444	67.6742	67.5928	5.80549	5.59646	372.19	281.884	1636.47	368.262	281.884	1577.55	0.000326593
B52	CG2186	0.326576	0.585301	0.303213	1.2302	1.15175	678.053	667.804	821.535	674.56	667.804	769.142	0.0836398
B52	CG2199	0.00991301	8.03906	8.40078	1.9847	1.99282	524.5	492.19	976.847	524.767	492.19	980.848	0.00444377
B52	CG2200	0.288605	0.212864	0.27566	1.06814	1.13658	55.8319	55.5795	59.3664	56.0855	55.5795	63.1703	0.0758659
B52	CG2202	0.00170487	40.361	32.4193	5.70083	4.84599	125.167	95.3007	543.293	119.736	95.3007	461.826	0.000854783
B52	CG2224	0.0634915	2.21769	1.53771	1.6025	1.48997	105.482	101.409	162.508	104.721	101.409	151.097	0.0225144
B52	CG2233	1	0.033318	1.49397	1.3017	4.94148	1.40982	1.38202	1.79898	1.74517	1.38202	6.82923	0.329903
B52	CG2247	0.00889411	8.65632	9.42005	2.2018	2.26743	207.391	192.007	422.761	208.231	192.007	435.363	0.00403864
B52	CG2258	0.927758	0.0560892	0.170209	1.09717	1.16479	64.9112	64.4934	70.76	65.202	64.4934	75.1215	0.206519
B52	CG2260	0.0075245	9.93549	11.0815	2.58403	2.7665	93.135	84.2392	217.677	94.1597	84.2392	233.047	0.00345278
B52	CG2263	0.00118164	49.7658	41.6523	5.87881	5.07683	171.139	129.137	759.17	164.235	129.137	655.606	0.000607552
B52	CG2269	0.0492795	1.79677	1.90863	2.7604	3.07534	5.58283	4.99645	13.7922	5.68773	4.99645	15.3658	0.0182249
B52	CG2278	0.0602123	1.53279	2.00665	1.91512	2.16372	20.93	19.7265	37.7786	21.2569	19.7265	42.6827	0.0215875
B52	CG2453	0.144005	0.741071	1.16908	1.3268	1.48763	52.1841	51.0714	67.7617	52.7316	51.0714	75.9751	0.0435179
B52	CG2469	0.002944	23.0841	21.0549	3.02749	2.86321	387.857	341.674	1034.41	384.115	341.674	978.287	0.00144413
B52	CG2493	0.0304166	4.6366	3.20158	1.59301	1.4737	535.319	514.961	820.336	531.223	514.961	758.898	0.0120585
B52	CG2519	0.0689522	2.08398	1.42726	1.46852	1.36854	326.772	316.875	465.337	324.66	316.875	433.656	0.0240965
B52	CG2604	0.364407	0.305165	0.176966	1.13007	1.09242	273.51	271.158	306.427	272.829	271.158	296.218	0.0911969
B52	CG2608	1	0.0734832	0.00241234	1.09252	1.04844	296.565	294.746	322.018	295.698	294.746	309.023	0.31303
B52	CG2656	0.086209	1.22245	0.975678	1.34301	1.30477	192.734	188.426	253.057	192.254	188.426	245.852	0.0290056
B52	CG2658	0.00969571	9.62278	8.17035	2.40465	2.2846	124.637	113.965	274.045	123.725	113.965	260.364	0.00435379
B52	CG2662	0.0529959	1.67158	1.76322	2.09058	2.19289	17.5386	16.3498	34.1807	17.6501	16.3498	35.8534	0.0193624
B52	CG2680	0.999659	0.583387	0.0779822	2.30079	1.31013	2.83234	2.60632	5.99661	2.66021	2.60632	3.41461	0.281383
B52	CG2681	0.0208486	4.34318	5.98305	3.12873	3.88936	15.5392	13.608	42.5759	16.2293	13.608	52.9265	0.00869586
B52	CG2685	0.00323126	26.1928	20.0506	5.72483	4.83628	54.5456	41.4799	237.466	52.0885	41.4799	200.609	0.00157589
B52	CG2691	0.00422744	17.5672	15.9511	2.59558	2.46567	533.195	481.931	1250.89	529.022	481.931	1188.29	0.00202067
B52	CG2694	0.104373	0.812461	1.00065	1.45154	1.60958	40.4279	39.2465	56.9678	40.8414	39.2465	63.1703	0.0337439
B52	CG2698	0.026569	4.53763	3.41792	2.23983	2.01078	160.87	148.588	332.812	158.601	148.588	298.779	0.0107475
B52	CG2701	0.0045393	16.366	15.1142	5.21413	4.94842	57.0117	44.5077	232.069	56.2233	44.5077	220.243	0.00215074
B52	CG2709	0.983153	0.2671	0.0593608	1.22514	1.057	16.3948	16.1523	19.7888	16.2137	16.1523	17.0731	0.238036
B52	CG2747	0.0577732	2.22966	3.87275	1.41926	1.58767	575.918	560.259	795.15	582.208	560.259	889.507	0.0208367
B52	CG2790	0.0036294	17.7012	19.9883	4.55318	4.91718	132.274	106.942	486.924	134.869	106.942	525.85	0.00176418
B52	CG2794	0.106449	0.95697	1.44112	1.2989	1.42923	97.4694	95.5651	124.13	98.2997	95.5651	136.585	0.0342612
B52	CG2807	0.00142507	40.5913	36.5906	4.67991	4.31388	202.814	162.86	762.169	198.839	162.86	702.557	0.0007238
B52	CG2811	0.0258398	3.52026	4.66355	4.08376	4.98298	8.67439	7.19518	29.3834	9.10573	7.19518	35.8534	0.0104477
B52	CG2818	0.0215215	4.02598	4.86085	2.10374	2.26926	59.3677	55.2987	116.334	59.9779	55.2987	125.487	0.00892548
B52	CG2852	0.00878458	9.50895	8.92763	2.0506	1.99962	500.662	467.891	959.457	499.072	467.891	935.604	0.0039938
B52	CG2862	0.472228	0.243769	0.127345	1.0796	1.05025	312.142	310.494	335.21	311.534	310.494	326.096	0.112472
B52	CG2887	1	0.000749419	0.0662086	1.18032	1.34421	5.14156	5.08049	5.99661	5.19707	5.08049	6.82923	0.325984
B52	CG2889	0.0355248	2.62079	3.47896	1.62056	1.76368	112.905	108.42	175.701	113.94	108.42	191.218	0.0138459
B52	CG2898	1	0.970446	0.0399393	2.66109	1.26274	5.25626	4.73222	12.5929	4.81511	4.73222	5.97557	0.321894
B52	CG2906	0.0842887	1.01989	1.0308	1.83527	1.85983	20.3513	19.2778	35.38	20.3828	19.2778	35.8534	0.028469
B52	CG2909	0.0530234	1.66476	1.93163	1.34173	1.36711	1161.06	1135.2	1523.14	1162.98	1135.2	1551.94	0.0193701
B52	CG2911	0.725802	0.268656	0.734781	1.33704	1.60596	29.3489	28.7039	38.3783	29.8635	28.7039	46.0973	0.158103
B52	CG2915	0.117846	2.82233	1.39343	1.45902	1.29408	271.938	263.863	384.982	269.037	263.863	341.461	0.0370796
B52	CG2918	0.00272841	21.9403	26.5947	2.7711	2.93323	1606.78	1437.1	3982.35	1622.31	1437.1	4215.34	0.00134233
B52	CG2921	0.302981	1.61772	0.677128	1.52287	1.30932	82.3144	79.5417	121.131	81.182	79.5417	104.146	0.0787927
B52	CG2926	0.0172359	4.92002	5.99934	2.16846	2.24725	985.151	913.956	1981.88	989.951	913.956	2053.89	0.00730297
B52	CG2941	0.995252	0.126676	0.634673	1.05352	1.38258	36.5585	36.4286	38.3783	37.3577	36.4286	50.3655	0.256373
B52	CG2970	0.00819121	11.9104	9.47702	2.69978	2.45506	138.974	124.828	337.009	136.937	124.828	306.462	0.00374206
B52	CG2972	0.00137422	41.406	37.4622	3.96321	3.65586	585.267	488.721	1936.9	575.253	488.721	1786.7	0.000697245
B52	CG2974	0.575187	0.879866	0.327032	1.37915	1.20819	57.9534	56.5247	77.9559	57.3092	56.5247	68.2923	0.131373
B52	CG2976	0.0138798	7.80778	6.14762	2.08288	1.93287	222.561	207.576	432.355	220.485	207.576	401.217	0.0059895
B52	CG2982	0.133637	0.71837	0.56994	1.2723	1.24124	137.245	134.798	171.503	136.966	134.798	167.316	0.0410775
B52	CG30001	0.00977727	7.90649	9.4214	3.34213	3.84583	24.8928	21.531	71.9593	25.6158	21.531	82.8044	0.00438232
B52	CG30007	0.0911431	1.21092	1.88896	1.42293	1.56409	205.389	199.757	284.239	207.269	199.757	312.437	0.0302915
B52	CG30008	0.00654149	11.4522	11.7933	9.81024	10.389	7.95632	5.01233	49.1722	8.1497	5.01233	52.0729	0.00302433
B52	CG30010	0.816102	0.0775491	0.192298	1.28614	1.38705	31.3593	30.7723	39.5776	31.5663	30.7723	42.6827	0.176882
B52	CG30015	0.0241302	3.74127	3.68429	1.61702	1.61869	278.376	267.377	432.355	278.406	267.377	432.802	0.00985709
B52	CG30016	0.605223	0.304227	0.755404	2.31493	3.95454	1.40874	1.2952	2.9983	1.55031	1.2952	5.12192	0.136626
B52	CG30020	0.0276068	3.19775	3.81607	1.58663	1.63459	488.945	470.542	746.578	490.449	470.542	769.142	0.0111029
B52	CG30022	0.017367	4.87027	5.79348	1.86784	2.02041	172.526	163.091	304.628	174.185	163.091	329.51	0.00736096
B52	CG30033	0.116963	1.36666	0.855216	3.78736	2.9953	1.68979	1.42499	5.39695	1.61454	1.42499	4.26827	0.0368664
B52	CG30046	0.0164197	6.08593	5.14598	2.69925	2.52843	57.1321	51.3186	138.522	56.5477	51.3186	129.755	0.00699545
B52	CG30062	0.0130983	6.98275	6.30602	4.16673	4.05846	16.5584	13.672	56.9678	16.4597	13.672	55.4875	0.00571251
B52	CG30069	0.0443172	2.17962	3.01867	1.94669	2.20718	37.0055	34.8086	67.7617	37.61	34.8086	76.8288	0.0166897
B52	CG3008	0.00181834	30.8395	32.3112	3.39898	3.3851	606.961	523.273	1778.59	606.476	523.273	1771.33	0.000906527
B52	CG30094	0.0740699	1.17015	1.22525	1.48732	1.51565	76.1795	73.7825	109.738	76.3189	73.7825	111.829	0.025578
B52	CG30118	0.00581728	12.3147	13.6058	2.53186	2.65457	164.451	149.213	377.786	165.672	149.213	396.095	0.00270893
B52	CG30122	0.000254018	120.429	135.617	8.19286	8.35758	1337.72	904.154	7407.61	1347.65	904.154	7556.54	0.0001488
B52	CG30152	0.0415052	2.17489	2.20773	1.47596	1.4806	305.161	295.775	436.553	305.252	295.775	437.924	0.0158132
B52	CG30156	0.126693	2.38329	1.20418	2.48328	1.96395	11.9411	10.8666	26.9847	11.5649	10.8666	21.3413	0.039408
B52	CG30157	0.391773	0.202042	0.334602	1.37971	1.48399	20.0534	19.5583	26.9847	20.1893	19.5583	29.0242	0.0967852
B52	CG30178	0.0780899	1.29384	1.07676	2.75903	2.68733	4.61382	4.12956	11.3936	4.59409	4.12956	11.0975	0.0267648
B52	CG30183	0.99439	0.688887	0.124837	1.23189	1.06519	133.462	131.431	161.908	132.002	131.431	139.999	0.25419
B52	CG30187	0.0531859	1.70619	2.14969	1.48634	1.60398	77.4744	75.0414	111.537	78.063	75.0414	120.365	0.0194179
B52	CG3021	0.00549479	23.9234	15.1797	5.3955	4.1187	49.5795	38.3436	206.883	46.3157	38.3436	157.926	0.0025626
B52	CG30263	0.0274817	3.31492	3.25518	4.81939	5.03118	4.68327	3.7328	17.9898	4.73597	3.7328	18.7804	0.0110569
B52	CG30273	0.248223	0.769364	0.41994	3.03068	2.46535	1.57255	1.38504	4.19762	1.52035	1.38504	3.41461	0.0670776
B52	CG30291	0.124961	2.71999	1.33082	1.82242	1.54107	81.2184	76.9968	140.321	79.7742	76.9968	118.658	0.038966
B52	CG30339	0.791643	0.586656	0.188897	1.44134	1.25197	50.5375	49.093	70.76	49.9177	49.093	61.463	0.171482
B52	CG30340	0.44791	0.236745	0.450221	1.35562	1.60817	10.8681	10.6165	14.3919	11.0469	10.6165	17.0731	0.108097
B52	CG30344	0.0692131	1.25813	1.34711	1.36259	1.41666	80.2292	78.3356	106.74	80.5115	78.3356	110.975	0.0241548
B52	CG30349	0.0144646	6.84751	5.78848	1.89736	1.82223	237.82	224.396	425.759	236.696	224.396	408.9	0.00623267
B52	CG30355	0.999946	0.671192	0.0737851	3.92387	1.86195	1.09568	0.916944	3.59796	0.969635	0.916944	1.70731	0.29245
B52	CG30357	0.0476185	1.92023	1.88051	2.02714	2.11278	17.7001	16.5657	33.581	17.7947	16.5657	34.9998	0.017744
B52	CG30373	0.0389195	2.43428	2.2654	1.95213	1.92985	47.042	44.2342	86.3511	46.9763	44.2342	85.3653	0.0149897
B52	CG30389	0.00160683	33.1918	36.1922	3.41377	3.4688	874.23	753.051	2570.75	876.993	753.051	2612.18	0.00080669
B52	CG30394	0.742517	0.439521	0.15709	1.15528	1.07667	247.532	244.996	283.04	246.248	244.996	263.779	0.161384
B52	CG30398	0.668367	0.610969	0.221411	2.96889	2.1132	1.82795	1.61585	4.79729	1.73577	1.61585	3.41461	0.147555
B52	CG30409	0.999983	0.576347	0.0567324	2.67271	1.46337	3.24199	2.91673	7.79559	3.00683	2.91673	4.26827	0.297539
B52	CG30414	1	0.415288	0.0233174	1.58193	1.17103	9.84437	9.47672	14.9915	9.58477	9.47672	11.0975	0.314427
B52	CG30421	0.0561175	1.76709	1.55079	1.5088	1.46262	239.568	231.708	349.602	238.854	231.708	338.9	0.0203094
B52	CG30424	0.234327	0.898487	2.01673	2.08505	2.9682	9.25211	8.62799	17.9898	9.7601	8.62799	25.6096	0.0638388
B52	CG3045	0.124993	0.970977	1.64884	1.47468	1.67618	54.1164	52.4564	77.3562	54.8211	52.4564	87.9263	0.038977
B52	CG30460	0.66486	2.19386	0.635555	1.9593	1.47662	38.7503	36.4211	71.3596	37.5783	36.4211	53.7802	0.146897
B52	CG30467	0.0100628	8.37058	7.9741	2.89117	2.90062	49.0479	43.5564	125.929	49.0753	43.5564	126.341	0.00450207
B52	CG30484	0.0905351	1.47883	2.63581	1.5678	1.9232	37.3146	35.9536	56.3681	38.1665	35.9536	69.1459	0.0301034
B52	CG30485	0.988671	0.5587	0.112567	1.78019	1.2671	7.08747	6.73706	11.9932	6.85702	6.73706	8.53653	0.244363
B52	CG30491	0.0978009	3.16642	1.60697	2.28839	1.85003	23.0487	21.2256	48.5725	22.4284	21.2256	39.2681	0.0320483
B52	CG30493	0.987921	0.472442	0.0983035	1.18714	1.05623	126.835	125.272	148.716	125.742	125.272	132.316	0.243368
B52	CG30495	0.242618	0.858269	1.92288	1.90701	2.54147	15.6728	14.7792	28.1841	16.2979	14.7792	37.5607	0.0657402
B52	CG30496	0.0365481	2.74037	2.39754	1.59872	1.56933	130.67	125.655	200.886	130.424	125.655	197.194	0.014154
B52	CG3078	0.126696	0.644578	0.780937	1.71521	1.86719	12.4536	11.8868	20.3885	12.574	11.8868	22.195	0.0394108
B52	CG3085	0.0721643	3.56138	1.92501	3.80461	2.83304	12.1604	10.2449	38.9779	11.4969	10.2449	29.0242	0.0250054
B52	CG3091	0.11286	0.737669	0.704293	1.69958	1.67146	96.7525	92.4411	157.111	96.5792	92.4411	154.511	0.0359002
B52	CG31029	0.463554	0.642486	1.73081	4.64282	9.914	0.642102	0.516635	2.39864	0.823654	0.516635	5.12192	0.110855
B52	CG31038	0.284949	0.184777	0.177759	1.38476	1.38721	11.9921	11.6921	16.1908	11.994	11.6921	16.2194	0.0749383
B52	CG3106	0.432891	0.065485	0.0673875	1.31081	1.39951	1.86781	1.82989	2.39864	1.87863	1.82989	2.56096	0.105131
B52	CG31064	0.0207959	11.2772	6.20755	2.63423	2.10832	113.599	102.439	269.847	110.008	102.439	215.974	0.00867813
B52	CG31068	0.0308281	3.65144	6.03832	3.23325	4.71231	8.94936	7.78961	25.1857	9.71745	7.78961	36.7071	0.0122045
B52	CG31075	0.14039	0.836926	0.589476	1.42128	1.34237	90.2233	87.7586	124.729	89.7616	87.7586	117.804	0.0427284
B52	CG31098	0.0693834	2.18955	1.46035	1.83393	1.67009	46.9417	44.4694	81.5538	46.456	44.4694	74.2678	0.0242059
B52	CG31115	0.284015	3.23765	1.17786	5.31954	3.0764	4.64608	3.60729	19.1891	4.10664	3.60729	11.0975	0.0747424
B52	CG31125	0.035584	5.92499	3.43714	5.21372	3.8823	9.57617	7.47604	38.9779	8.91258	7.47604	29.0242	0.0138654
B52	CG31126	0.0142556	6.93442	5.87142	2.97118	2.81977	36.3074	32.0903	95.346	35.9834	32.0903	90.4873	0.00614736
B52	CG31145	0.142916	0.579339	0.50994	1.13663	1.13073	1937.35	1919.86	2182.17	1936.59	1919.86	2170.84	0.0432925
B52	CG31156	0.0138129	5.92498	6.80136	2.04262	2.13844	150.71	140.916	287.837	151.611	140.916	301.34	0.00596002
B52	CG31161	0.00501105	13.8787	15.4466	7.44008	8.38102	13.2483	9.26885	68.961	13.8298	9.26885	77.6825	0.00235827
B52	CG31202	0.497764	0.125817	0.0737098	2.04214	1.93808	0.942132	0.880929	1.79898	0.936021	0.880929	1.70731	0.117043
B52	CG31211	0.00355943	20.1733	18.1384	3.01711	2.86953	209.246	184.443	556.485	207.431	184.443	529.265	0.00172891
B52	CG31223	0.0106611	8.98331	7.58199	3.56452	3.34236	32.8977	28.0945	100.143	32.4816	28.0945	93.9019	0.00474031
B52	CG31229	0.391051	0.192886	0.312297	1.2046	1.29271	32.7989	32.3575	38.9779	32.989	32.3575	41.829	0.0965927
B52	CG31231	1	1.32307	0.0145085	2.46557	1.02372	6.40744	5.83713	14.3919	5.84636	5.83713	5.97557	0.33652
B52	CG31278	0.649492	3.74767	0.997388	2.98594	1.84569	17.2837	15.2629	45.5742	16.1234	15.2629	28.1706	0.144439
B52	CG31296	0.0854342	0.994051	1.12148	2.57535	2.85147	4.63141	4.19123	10.7939	4.70856	4.19123	11.9511	0.0287895
B52	CG31301	0.104022	1.12657	1.83486	1.33447	1.48394	136.437	133.461	178.099	137.767	133.461	198.048	0.0336355
B52	CG31342	1	0.310633	0.00379984	1.11055	1.01025	465.619	462.212	513.31	462.528	462.212	466.948	0.331263
B52	CG31347	0.0307206	3.89956	6.73182	3.49813	5.19631	9.19874	7.88548	27.5844	10.0915	7.88548	40.9754	0.0121591
B52	CG31365	0.0371632	2.45268	3.1329	1.58486	1.70735	130.909	125.997	199.687	131.938	125.997	215.121	0.0144024
B52	CG31368	0.0106927	8.11864	7.56053	2.27018	2.23392	124.347	114.64	260.253	124.07	114.64	256.096	0.00475397
B52	CG31370	0.0909651	1.41836	2.47076	1.56309	1.77621	90.7532	87.4697	136.723	91.996	87.4697	155.365	0.0302433
B52	CG31381	0.0386505	4.99688	2.99952	2.67964	2.23295	30.6077	27.5255	73.7583	29.788	27.5255	61.463	0.0148952
B52	CG31388	1	1.10221	0.0593608	1.70823	1.10009	15.4399	14.7437	25.1857	14.8421	14.7437	16.2194	0.316413
B52	CG31436	0.0178758	5.10267	4.79767	2.43466	2.40944	50.4637	46.0584	112.137	50.3862	46.0584	110.975	0.00754252
B52	CG31441	0.0733561	1.3774	2.00503	1.86558	2.10126	30.9384	29.2505	54.5691	31.398	29.2505	61.463	0.0253559
B52	CG31467	0.147227	0.559952	0.489113	2.25927	2.21114	4.60329	4.24677	9.59457	4.58966	4.24677	9.39019	0.0442551
B52	CG31525	0.165209	0.962014	1.89379	2.16722	2.77665	14.9113	13.8348	29.983	15.4734	13.8348	38.4144	0.048541
B52	CG31538	0.226727	0.516051	0.336153	1.93048	1.74883	3.62886	3.41691	6.59627	3.58748	3.41691	5.97557	0.0622785
B52	CG31547	0.0298568	3.53863	2.93837	7.94509	7.12132	2.98137	2.03784	16.1908	2.86946	2.03784	14.5121	0.0118383
B52	CG31550	0.000339751	99.9708	104.779	10.6558	10.5288	159.657	97.1313	1035.01	158.834	97.1313	1022.68	0.000193573
B52	CG31551	0.998036	0.285027	0.0465589	1.94678	1.38568	3.2747	3.08028	5.99661	3.15948	3.08028	4.26827	0.266038
B52	CG31559	0.999943	0.036034	0.302374	1.07818	1.38137	16.7723	16.6853	17.9898	17.1096	16.6853	23.0486	0.292201
B52	CG3156	0.951216	0.281782	0.0743046	1.4178	1.21099	13.042	12.6886	17.9898	12.8671	12.6886	15.3658	0.216221
B52	CG31601	0.0101492	8.09254	11.4381	2.12257	2.38632	462.169	429.989	912.684	469.729	429.989	1026.09	0.00453453
B52	CG31619	0.00839352	9.31001	9.56644	2.04611	2.03434	796.323	744.408	1523.14	795.739	744.408	1514.38	0.00382627
B52	CG31626	0.245667	0.459414	0.296804	2.20342	1.96043	2.35188	2.1772	4.79729	2.31661	2.1772	4.26827	0.0665004
B52	CG3163	0.0466048	1.9151	1.98369	1.59292	1.61707	95.4857	91.8549	146.317	95.6336	91.8549	148.536	0.0174076
B52	CG31638	0.00826935	10.5549	9.29363	2.44838	2.2874	301.605	275.047	673.419	298.654	275.047	629.143	0.00377554
B52	CG3165	0.00224118	27.2095	26.5947	4.38107	4.31919	110.197	89.9272	393.977	109.826	89.9272	388.412	0.00111032
B52	CG31650	0.0236639	4.21363	6.45594	1.66857	1.87887	350.252	335.307	559.483	354.952	335.307	629.996	0.0096982
B52	CG31674	0.0525951	1.74716	2.24502	1.98398	2.30557	15.7818	14.8103	29.3834	16.0993	14.8103	34.1461	0.0192256
B52	CG31710	0.0161783	5.90736	5.20215	2.283	2.21951	70.1419	64.6152	147.517	69.8684	64.6152	143.414	0.00688286
B52	CG31712	0.00549333	13.6239	13.1873	4.20378	3.99621	103.696	85.4462	359.197	102.514	85.4462	341.461	0.002562
B52	CG31728	0.959483	0.115765	0.413296	1.66965	3.56528	0.750374	0.718306	1.19932	0.84115	0.718306	2.56096	0.22013
B52	CG31731	0.612447	0.0160453	0.0123323	1.07919	1.06586	260.863	259.493	280.042	260.632	259.493	276.584	0.13778
B52	CG31739	0.175403	0.453043	0.384488	1.1781	1.16261	258.555	255.521	301.03	258.291	255.521	297.071	0.0507762
B52	CG31792	0.139858	0.657558	0.532228	3.80617	3.61221	1.12214	0.945298	3.59796	1.10992	0.945298	3.41461	0.0426207
B52	CG31793	0.00803781	10.4211	9.51458	2.34945	2.27356	198.076	181.727	426.958	197.157	181.727	413.168	0.00367276
B52	CG31798	0.211948	3.27725	1.29606	3.40822	2.32043	9.39289	8.0935	27.5844	8.80596	8.0935	18.7804	0.0590028
B52	CG31800	0.230153	0.267186	0.270954	1.06818	1.08673	211.477	210.52	224.873	211.738	210.52	228.779	0.0630181
B52	CG31803	0.415361	1.513	0.576715	6.15749	3.50622	1.30872	0.973872	5.99661	1.13659	0.973872	3.41461	0.101637
B52	CG3184	0.0681783	1.29371	1.31568	1.78838	1.86393	19.7643	18.7774	33.581	19.8589	18.7774	34.9998	0.0238427
B52	CG31897	0.240901	0.46054	0.788049	1.57696	1.89953	10.2671	9.88683	15.5912	10.4797	9.88683	18.7804	0.0653355
B52	CG31908	0.0720075	1.46137	1.18907	1.35542	1.31891	214.675	209.706	284.239	214.164	209.706	276.584	0.0249529
B52	CG3191	0.0578987	2.67293	1.76971	2.5721	2.23497	19.8333	17.9518	46.1739	19.4298	17.9518	40.1217	0.0208837
B52	CG31915	0.130834	0.732825	1.06231	1.30181	1.37237	173.865	170.436	221.874	174.667	170.436	233.901	0.0403608
B52	CG31918	0.11673	0.738073	0.942563	1.27155	1.31224	205.978	202.315	257.254	206.527	202.315	265.486	0.0368192
B52	CG3192	0.0947219	1.10282	0.869705	1.43622	1.38414	97.1051	94.3609	135.523	96.7775	94.3609	130.609	0.0312851
B52	CG31922	0.383354	0.538475	1.25495	1.61167	2.059	15.1026	14.5109	23.3868	15.5354	14.5109	29.8779	0.0950394
B52	CG31950	0.47651	0.876381	0.354066	1.74185	1.43055	18.7872	17.9019	31.1824	18.4157	17.9019	25.6096	0.113146
B52	CG31952	0.177013	0.529934	0.788449	16.2457	34.6901	0.148857	0.073824	1.19932	0.239633	0.073824	2.56096	0.0511472
B52	CG31955	0.0629383	1.38885	1.48835	1.63981	1.70525	107.523	103.124	169.104	107.973	103.124	175.853	0.0223718
B52	CG31957	0.0328796	2.82387	2.72051	3.27936	3.27605	12.0068	10.423	34.1807	12.0045	10.423	34.1461	0.0129222
B52	CG3198	0.727424	0.302632	0.852597	1.07252	1.20392	342.708	341.059	365.793	345.695	341.059	410.607	0.158412
B52	CG32024	0.995932	0.161854	0.028695	3.01255	2.14427	0.451523	0.398109	1.19932	0.428478	0.398109	0.853653	0.258212
B52	CG32026	0.196209	0.396399	0.523995	2.29129	2.66874	3.12667	2.87885	6.59627	3.19912	2.87885	7.68288	0.055553
B52	CG32068	0.0588101	4.82597	2.5149	2.2817	1.85608	45.9285	42.313	96.5454	44.7278	42.313	78.5361	0.021164
B52	CG32075	0.0499047	1.87663	2.49632	1.41543	1.49719	343.96	334.691	473.732	345.784	334.691	501.095	0.0184037
B52	CG32082	0.0174215	5.40597	8.04688	2.01444	2.38055	99.1575	92.8763	187.094	101.424	92.8763	221.096	0.00738091
B52	CG3209	0.989548	0.0217595	0.0975057	1.05911	1.08811	241.011	240.065	254.256	241.475	240.065	261.218	0.245407
B52	CG32104	0.856451	0.75052	3.15981	1.35513	1.9443	57.5296	56.1991	76.1569	59.737	56.1991	109.268	0.185626
B52	CG32112	0.909498	1.06512	0.267862	1.63197	1.27493	31.4001	30.1306	49.1722	30.6829	30.1306	38.4144	0.200631
B52	CG32113	0.727174	0.583607	1.98202	1.27336	1.57085	362.99	356.493	453.943	370.06	356.493	559.997	0.158368
B52	CG32115	0.280973	0.233012	0.30787	1.27384	1.40125	10.5456	10.3565	13.1925	10.6336	10.3565	14.5121	0.0741324
B52	CG32138	0.0245919	3.92548	5.72594	1.59168	1.71344	2194.18	2110.92	3359.9	2211.32	2110.92	3616.93	0.0100313
B52	CG3214	0.0477772	2.21291	1.83926	1.56741	1.50272	252.922	243.704	381.984	251.871	243.704	366.217	0.0177987
B52	CG3216	0.0397053	2.48545	3.54769	4.80943	6.33937	4.22143	3.36648	16.1908	4.5648	3.36648	21.3413	0.0152099
B52	CG32161	0.470685	0.416435	0.98791	2.49265	4.13984	1.58707	1.44343	3.59796	1.74557	1.44343	5.97557	0.112179
B52	CG32164	0.161205	1.41119	3.21401	1.44974	1.75199	118.438	114.99	166.706	120.755	114.99	201.462	0.0476037
B52	CG32165	0.106953	0.970709	1.4799	1.59925	1.91443	17.1576	16.4984	26.3851	17.5042	16.4984	31.5852	0.034401
B52	CG32176	0.00113224	43.9107	44.4716	5.63551	5.53934	152.106	116.197	654.829	151.361	116.197	643.655	0.000582087
B52	CG32187	0.869436	0.208184	0.657658	1.0512	1.20391	152.258	151.74	159.51	153.803	151.74	182.682	0.188833
B52	CG32191	1	0.00230462	0.243521	1.09341	3.11308	0.551846	0.548431	0.599661	0.625689	0.548431	1.70731	0.331435
B52	CG32225	0.56087	0.436041	0.186096	2.25654	1.78462	2.59204	2.39169	5.39695	2.5168	2.39169	4.26827	0.12894
B52	CG32236	0.966398	0.144633	0.0358592	2.44079	1.73731	0.538563	0.491366	1.19932	0.515518	0.491366	0.853653	0.224155
B52	CG3225	0.219238	0.368127	0.283707	1.3228	1.2821	43.5296	42.6126	56.3681	43.414	42.6126	54.6338	0.0606389
B52	CG3226	0.0195116	4.90121	4.39688	1.7188	1.66376	485.52	463.317	796.349	483.82	463.317	770.849	0.00816332
B52	CG32260	0.469087	0.135833	0.0822596	1.79713	1.70555	1.05423	1.00103	1.79898	1.04811	1.00103	1.70731	0.111979
B52	CG32263	0.884049	0.146558	0.441296	2.17478	4.64389	0.594659	0.551468	1.19932	0.685434	0.551468	2.56096	0.192464
B52	CG32264	0.0490151	2.3009	1.81888	1.53266	1.46156	294.543	284.443	435.953	293.195	284.443	415.729	0.0181425
B52	CG32277	0.0661408	2.76881	1.7007	18.9341	11.5517	1.46027	0.665089	12.5929	1.13294	0.665089	7.68288	0.0232426
B52	CG32295	1	0.294361	0.00106603	2.53324	1.44249	1.30456	1.18358	2.9983	1.2185	1.18358	1.70731	0.33652
B52	CG32301	0.0331264	3.76644	2.78836	5.69121	4.86107	4.84117	3.68782	20.9881	4.63708	3.68782	17.9267	0.0130171
B52	CG32344	0.000691458	62.8611	62.1473	6.43504	6.21317	193.728	142.203	915.082	191.625	142.203	883.531	0.00036198
B52	CG32368	0.000106913	205.617	241.233	13.6142	14.6491	1176.09	638.851	8697.48	1220.17	638.851	9358.6	9.04783e-05
B52	CG3238	0.0702744	1.48687	2.23257	1.78469	2.01132	42.4296	40.3204	71.9593	43.0388	40.3204	81.0971	0.0244683
B52	CG32407	0.025402	3.44566	3.77006	2.21836	2.31584	43.8411	40.5476	89.9491	44.1046	40.5476	93.9019	0.0102798
B52	CG32409	0.000803266	56.4901	56.0975	4.86445	4.68825	539.051	428.624	2085.02	534.016	428.624	2009.5	0.000422104
B52	CG32425	0.11731	1.11759	0.762098	1.24715	1.19464	785.903	773.163	964.254	783.196	773.163	923.653	0.0369531
B52	CG32436	0.0880279	1.2843	0.976609	2.4071	2.17021	16.3495	14.9473	35.9796	16.1134	14.9473	32.4388	0.0295058
B52	CG32444	0.999986	0.636878	0.0606898	5.94077	2.11426	0.536752	0.40376	2.39864	0.433753	0.40376	0.853653	0.298488
B52	CG32448	0.00593698	13.4618	12.2565	4.01082	3.85787	46.4959	38.7233	155.312	46.1011	38.7233	149.389	0.00276701
B52	CG32452	0.0189732	4.7069	4.61548	2.09942	2.09103	89.8242	83.6902	175.701	89.7774	83.6902	174.999	0.00795068
B52	CG32454	0.100672	1.43276	0.950061	4.78365	3.89132	2.19767	1.75499	8.39525	2.09327	1.75499	6.82923	0.0328227
B52	CG3246	0.375189	1.00515	0.434191	2.54293	1.8962	5.4615	4.95212	12.5929	5.24799	4.95212	9.39019	0.0933815
B52	CG32473	0.0386177	2.31708	2.78569	1.57935	1.67427	111.207	107.072	169.104	111.885	107.072	179.267	0.014885
B52	CG32485	0.367509	0.531125	1.20664	1.21911	1.40141	106.302	104.772	127.728	107.575	104.772	146.828	0.0918517
B52	CG32486	0.0835829	2.18919	1.3358	1.48818	1.36218	222.594	215.578	320.818	220.783	215.578	293.657	0.0283099
B52	CG32506	0.349618	0.209266	0.140967	1.90495	1.80788	1.00134	0.94437	1.79898	0.995233	0.94437	1.70731	0.0881389
B52	CG32533	0.0215128	4.69488	3.99792	2.30511	2.19842	57.4041	52.8093	121.731	57.0285	52.8093	116.097	0.00892074
B52	CG32554	0.0191498	4.73333	4.54435	3.42816	3.41089	18.9011	16.2677	55.7684	18.8824	16.2677	55.4875	0.00801579
B52	CG3257	0.0126331	6.4278	6.99937	2.8645	3.06452	38.835	34.5415	98.944	39.2956	34.5415	105.853	0.00552621
B52	CG32572	0.220394	0.452786	0.315633	1.92877	1.83048	2.97139	2.79813	5.39695	2.95305	2.79813	5.12192	0.060867
B52	CG32579	0.196813	0.768927	0.467966	1.24898	1.17979	156.677	154.119	192.491	155.966	154.119	181.828	0.0556499
B52	CG32668	0.0377635	2.38242	2.4421	4.45935	4.65531	4.96456	4.03418	17.9898	5.01726	4.03418	18.7804	0.0146027
B52	CG32669	0.0703581	1.40855	2.01587	2.56439	3.22935	6.71395	6.07987	15.5912	6.98348	6.07987	19.634	0.0244978
B52	CG32681	0.498942	0.982448	0.379957	1.53925	1.31098	47.2195	45.5809	70.1603	46.5259	45.5809	59.7557	0.117285
B52	CG32687	0.0682349	2.3878	1.54494	1.71755	1.55976	84.8747	80.9999	139.121	84.0226	80.9999	126.341	0.0238644
B52	CG32698	1	0.337241	0.021813	1.24831	1.01175	66.9012	65.8118	82.1535	65.8633	65.8118	66.585	0.310433
B52	CG32699	0.977461	0.0201064	0.0792082	1.01753	1.04263	1010.7	1009.52	1027.22	1012.39	1009.52	1052.55	0.232639
B52	CG32706	0.00207384	27.0139	31.9728	19.146	23.4195	9.34332	4.22826	80.9542	10.548	4.22826	99.0238	0.00103551
B52	CG32708	0.00929434	8.94206	8.54162	2.66363	2.65021	116.296	104.685	278.842	116.202	104.685	277.437	0.00418454
B52	CG32719	0.0292153	3.01607	3.40145	6.93875	7.99626	2.5334	1.81486	12.5929	2.66134	1.81486	14.5121	0.0116112
B52	CG32756	1	0.0732734	1.44887	1.1035	1.67562	41.0377	40.7564	44.9745	42.5922	40.7564	68.2923	0.319291
B52	CG32758	0.212526	0.310641	0.290861	1.16518	1.15561	566.105	559.939	652.431	565.747	559.939	647.069	0.0591385
B52	CG32767	0.111824	1.11552	1.89466	1.47939	1.63979	602.767	584.1	864.111	609.013	584.1	957.799	0.0356355
B52	CG3277	0.680758	0.429494	0.163551	3.07368	2.18779	1.77653	1.56076	4.79729	1.68435	1.56076	3.41461	0.149933
B52	CG32783	0.902205	0.0723103	0.210193	1.77887	2.53233	1.06382	1.01131	1.79898	1.11462	1.01131	2.56096	0.198111
B52	CG3280	0.0989488	0.9611	0.810179	4.50511	4.27553	1.47789	1.19796	5.39695	1.45956	1.19796	5.12192	0.0323535
B52	CG32808	0.436085	0.53013	1.31065	1.78509	2.69066	6.00967	5.71077	10.1942	6.35444	5.71077	15.3658	0.105737
B52	CG32809	0.00799562	9.50309	10.4025	2.81299	2.9604	72.3992	64.5922	181.697	73.0339	64.5922	191.218	0.00364792
B52	CG32813	0.0258611	3.81203	5.65089	2.14136	2.53169	53.3381	49.5666	106.14	54.6279	49.5666	125.487	0.0104581
B52	CG32815	0.0393755	2.44503	2.23209	4.84032	4.66775	4.82381	3.84055	18.5895	4.77963	3.84055	17.9267	0.0151065
B52	CG32829	0.0589258	2.41802	4.49465	7.2407	11.8934	3.04913	2.15327	15.5912	3.71702	2.15327	25.6096	0.0212017
B52	CG32845	0.0728666	4.29092	2.17381	6.80087	4.64709	3.05683	2.20435	14.9915	2.74032	2.20435	10.2438	0.0252122
B52	CG32850	0.0280462	3.78991	6.00571	1.57917	1.75357	1624.51	1564.11	2470	1642.69	1564.11	2742.79	0.0112437
B52	CG3294	0.00250214	23.4634	26.3348	8.14037	9.30017	17.0708	11.5654	94.1467	17.9651	11.5654	107.56	0.00123949
B52	CG33017	0.55068	0.14822	0.282821	2.40925	3.42971	0.816851	0.746699	1.79898	0.86765	0.746699	2.56096	0.126874
B52	CG33051	0.00195148	28.2345	34.325	8.37886	9.57335	57.3379	38.4322	322.018	60.3983	38.4322	367.925	0.000975949
B52	CG33052	0.0122475	10.2999	7.2869	2.85246	2.47397	91.8771	81.7778	233.268	89.8137	81.7778	202.316	0.00537825
B52	CG3308	0.275204	0.201177	0.185225	1.09115	1.09438	145.967	145.086	158.31	145.999	145.086	158.78	0.0728154
B52	CG33082	0.0221797	4.21846	3.90921	6.07148	5.89304	5.81503	4.34574	26.3851	5.76333	4.34574	25.6096	0.00915009
B52	CG33090	0.0942017	0.896648	0.890932	1.41192	1.4293	58.9108	57.3362	80.9542	58.9772	57.3362	81.9507	0.0311618
B52	CG33111	0.0805857	1.55035	1.12637	1.57968	1.48981	63.0847	60.7375	95.9457	62.7208	60.7375	90.4873	0.027465
B52	CG33123	0.00226075	25.9714	27.214	3.23775	3.23528	452.708	393.939	1275.48	452.643	393.939	1274.5	0.00112045
B52	CG33155	0.999988	0.252235	0.0221823	1.83706	1.30758	2.75712	2.61139	4.79729	2.66494	2.61139	3.41461	0.298845
B52	CG33156	0.317228	0.150596	0.140845	1.09656	1.10263	69.3472	68.9036	75.5572	69.375	68.9036	75.9751	0.081704
B52	CG33158	0.037511	3.50452	2.51627	1.67739	1.55731	180.468	172.67	289.636	179.086	172.67	268.901	0.0145174
B52	CG33203	0.999702	0.00363239	0.040969	1.13468	1.25634	4.79906	4.75635	5.39695	4.83763	4.75635	5.97557	0.282353
B52	CG3321	0.0328954	2.82897	2.71548	1.72463	1.73117	85.2932	81.3627	140.321	85.3287	81.3627	140.853	0.0129304
B52	CG33223	0.196821	0.47261	0.351384	3.9327	3.73229	0.546878	0.457442	1.79898	0.540766	0.457442	1.70731	0.0556538
B52	CG33228	0.40642	0.0848148	0.0961641	1.23229	1.26695	8.89484	8.7592	10.7939	8.91508	8.7592	11.0975	0.0997132
B52	CG3323	0.0639486	1.53601	1.34322	1.78435	1.7634	42.7904	40.6641	72.5589	42.7336	40.6641	71.7069	0.0226439
B52	CG33253	0.978725	0.227124	0.0527581	1.23751	1.05701	7.38363	7.26853	8.99491	7.29616	7.26853	7.68288	0.233921
B52	CG3326	0.0107394	7.36995	8.15148	4.79752	5.28478	13.1576	10.4995	50.3715	13.4987	10.4995	55.4875	0.00477841
B52	CG33260	0.0456479	2.13475	1.92242	2.04724	2.08169	15.3547	14.3527	29.3834	15.3877	14.3527	29.8779	0.017098
B52	CG33267	0.220839	1.35653	0.661654	3.65092	2.7719	2.89915	2.46374	8.99491	2.75477	2.46374	6.82923	0.0610068
B52	CG3328	0.9973	0.888148	0.143955	2.40092	1.36714	4.09634	3.74645	8.99491	3.83814	3.74645	5.12192	0.262873
B52	CG33288	0.069845	1.25773	1.48746	2.61166	2.9433	6.1027	5.51062	14.3919	6.22454	5.51062	16.2194	0.0243378
B52	CG33298	0.0252007	3.51863	3.63153	1.66391	1.67877	232.581	222.723	370.59	232.802	222.723	373.9	0.010221
B52	CG33303	0.994455	0.0239023	0.118295	1.01939	1.05924	484.17	483.544	492.921	485.454	483.544	512.192	0.25434
B52	CG3335	0.000778641	55.2602	66.1659	7.12639	7.94513	119.699	84.9879	605.657	124.338	84.9879	675.24	0.000406744
B52	CG3338	0.134391	0.704667	1.01467	1.22036	1.30718	153.07	150.854	184.096	153.944	150.854	197.194	0.0412223
B52	CG33506	0.128972	0.667003	0.867385	1.29378	1.40412	47.73	46.8132	60.5657	48.0744	46.8132	65.7313	0.0398998
B52	CG33509	0.998881	0.067867	0.399794	1.34489	1.91454	6.38584	6.24231	8.39525	6.6229	6.24231	11.9511	0.271658
B52	CG3353	0.0118886	11.5992	7.79149	2.51289	2.17544	142.122	129.101	324.416	139.218	129.101	280.852	0.00524117
B52	CG3356	0.122922	0.666376	0.629185	1.20657	1.20476	285.174	281.3	339.408	285.14	281.3	338.9	0.0384605
B52	CG3358	0.00289585	22.3099	21.736	5.55961	5.50786	44.8663	34.4074	191.292	44.7476	34.4074	189.511	0.00142077
B52	CG33655	0.395731	0.132307	0.0938708	1.31094	1.27687	8.87131	8.69115	11.3936	8.85158	8.69115	11.0975	0.0975793
B52	CG33914	1	0.0190838	0.268819	1.08499	2.31682	1.11164	1.10538	1.19932	1.20242	1.10538	2.56096	0.310271
B52	CG33969	0.00387293	20.4577	16.9507	3.74776	3.39939	106.963	90.4029	338.808	104.864	90.4029	307.315	0.00187187
B52	CG33970	0.342756	0.892951	0.411135	1.65836	1.43078	12.4565	11.9327	19.7888	12.2754	11.9327	17.0731	0.0868057
B52	CG3407	0.993503	0.399313	0.0768872	1.32781	1.13413	39.2263	38.3873	50.9712	38.7306	38.3873	43.5363	0.252285
B52	CG3408	0.309624	0.612609	0.323372	1.32927	1.2012	53.0176	51.8788	68.961	52.5747	51.8788	62.3167	0.0800395
B52	CG34124	0.0534633	1.67542	2.05044	10.412	13.1752	0.843582	0.518341	5.39695	0.939067	0.518341	6.82923	0.0194968
B52	CG34125	0.0373798	3.62605	2.56521	2.05969	1.87725	51.1204	47.7472	98.3443	50.5396	47.7472	89.6336	0.0144711
B52	CG34126	0.0113655	7.90424	7.14833	2.11769	2.05931	172.824	160.839	340.607	172.198	160.839	331.218	0.00502275
B52	CG34138	0.313128	0.227124	0.161705	2.71064	2.57251	0.739361	0.663673	1.79898	0.733249	0.663673	1.70731	0.0807813
B52	CG34141	0.760584	0.856025	0.270341	2.91749	1.93817	3.47722	3.0831	8.99491	3.27593	3.0831	5.97557	0.165087
B52	CG34149	0.982456	0.18741	0.826825	1.09539	1.55936	18.1804	18.0655	19.7888	18.7391	18.0655	28.1706	0.237277
B52	CG34159	0.415608	0.783124	0.343564	1.27553	1.16635	131.181	128.815	164.307	130.243	128.815	150.243	0.101692
B52	CG34174	0.122474	1.55986	3.29066	2.44347	3.60266	7.53284	6.87158	16.7905	8.06387	6.87158	24.7559	0.0383031
B52	CG34195	0.10558	1.08127	1.73545	1.67557	1.85317	48.6205	46.5251	77.9559	49.1713	46.5251	86.219	0.0340587
B52	CG34214	0.182957	1.27397	0.675528	8.49972	5.37772	0.952421	0.634955	5.39695	0.820266	0.634955	3.41461	0.0525592
B52	CG34232	0.0073058	10.5113	10.6841	4.17301	4.24324	51.1845	42.2477	176.3	51.3823	42.2477	179.267	0.00336124
B52	CG34269	0.165856	0.797603	0.522215	2.73784	2.39845	3.17723	2.84735	7.79559	3.11281	2.84735	6.82923	0.0487038
B52	CG34287	0.417668	0.145095	0.220526	5.53254	7.87591	0.141139	0.108388	0.599661	0.158072	0.108388	0.853653	0.102076
B52	CG3430	0.194314	0.704367	1.29588	1.27994	1.51412	67.7694	66.5278	85.1518	68.808	66.5278	100.731	0.0551639
B52	CG34334	0.0100057	8.80543	7.95612	2.77431	2.70308	58.9784	52.74	146.317	58.728	52.74	142.56	0.00447745
B52	CG3434	0.0526281	2.30261	1.73501	1.59155	1.50781	112.4	108.135	172.103	111.796	108.135	163.048	0.0192378
B52	CG3436	0.352548	0.12288	0.108902	1.07385	1.07229	156.005	155.241	166.706	155.989	155.241	166.462	0.0887848
B52	CG34376	0.119785	0.887203	0.673991	1.37927	1.33322	72.2131	70.4323	97.145	71.9969	70.4323	93.9019	0.0376155
B52	CG34382	0.222796	1.04796	0.545565	4.84669	3.44978	1.55455	1.23726	5.99661	1.43933	1.23726	4.26827	0.0614491
B52	CG34383	0.131748	1.41263	0.828804	4.27314	3.2443	2.56432	2.10499	8.99491	2.41994	2.10499	6.82923	0.0405918
B52	CG34386	0.383768	3.58116	1.16613	4.24586	2.53858	8.58979	7.06171	29.983	7.78604	7.06171	17.9267	0.0951113
B52	CG34401	0.0381542	2.38418	2.37541	1.48488	1.46826	965.122	934.901	1388.21	964.086	934.901	1372.67	0.01472
B52	CG34402	0.0549528	1.62535	1.98185	3.14129	3.57746	6.54441	5.72688	17.9898	6.71093	5.72688	20.4877	0.0199667
B52	CG34404	0.0108085	8.44368	7.45351	2.60419	2.47814	94.5656	85.4293	222.474	93.8477	85.4293	211.706	0.00480647
B52	CG34408	0.0235746	4.99467	3.79697	1.67483	1.5678	521.192	498.754	835.327	517.634	498.754	781.946	0.00966447
B52	CG34409	0.0983323	0.839776	0.876542	2.49227	2.61424	5.02635	4.57155	11.3936	5.06353	4.57155	11.9511	0.0321867
B52	CG34417	0.0211698	6.5119	4.54079	1.92149	1.73427	257.053	242.175	465.337	254.03	242.175	419.997	0.00881019
B52	CG34422	0.0105526	8.84851	7.62372	1.96955	1.87099	669.361	628.723	1238.3	665.23	628.723	1176.33	0.00470453
B52	CG34423	0.0523729	1.68707	1.97324	2.01099	2.14708	26.7363	25.0481	50.3715	26.9636	25.0481	53.7802	0.0191612
B52	CG34424	0.0516019	3.42848	2.13299	3.86287	2.96773	11.6465	9.77993	37.7786	11.0629	9.77993	29.0242	0.0189143
B52	CG34439	0.00393627	16.7351	18.1134	3.45393	3.5605	117.171	100.698	347.803	117.887	100.698	358.534	0.00189847
B52	CG34442	0.761089	0.0382196	0.0833193	1.10003	1.56596	0.548765	0.54513	0.599661	0.565698	0.54513	0.853653	0.165144
B52	CG34450	0.829227	0.618285	0.189085	3.18567	1.94357	1.50966	1.31766	4.19762	1.40055	1.31766	2.56096	0.179665
B52	CG3446	0.0347701	5.64322	3.34916	1.96906	1.69068	226.303	212.57	418.563	222.358	212.57	359.388	0.0135773
B52	CG3457	0.442281	0.5703	0.259297	1.3643	1.19095	95.4447	93.1816	127.128	94.3678	93.1816	110.975	0.106988
B52	CG3499	0.0953019	0.882806	0.883269	1.22565	1.22601	726.553	715.785	877.304	726.569	715.785	877.556	0.031454
B52	CG3511	0.00848998	11.4584	9.20404	3.24409	2.97124	57.8004	50.2784	163.108	56.8858	50.2784	149.389	0.00386662
B52	CG3520	0.726376	4.47087	1.09132	2.04201	1.44396	96.103	89.8606	183.496	92.5203	89.8606	129.755	0.158181
B52	CG3529	0.011633	9.11096	7.18349	2.31758	2.1257	180.424	165.855	384.382	178.302	165.855	352.559	0.00513714
B52	CG3530	0.0236953	3.67174	4.33355	1.68319	1.78113	153.839	147.138	247.66	154.8	147.138	262.072	0.00970913
B52	CG3534	0.188953	0.540476	0.386373	1.24325	1.2078	72.5429	71.3852	88.7498	72.3741	71.3852	86.219	0.0539495
B52	CG3542	0.00137683	37.9015	39.5353	5.25895	5.27706	137.911	107.413	564.88	138.041	107.413	566.826	0.00069966
B52	CG3552	0.0544091	1.70662	1.62145	1.79662	1.82229	28.1198	26.7017	47.9729	28.1655	26.7017	48.6582	0.0197989
B52	CG3566	0.00949474	8.11284	9.75885	2.42799	2.69675	73.8438	67.425	163.707	75.0519	67.425	181.828	0.00426579
B52	CG3570	0.0162543	7.73961	5.60596	2.7221	2.41792	59.4314	53.311	145.118	58.3504	53.311	128.902	0.00691927
B52	CG3587	0.102872	1.4247	0.936461	1.81202	1.64491	24.0707	22.8345	41.3766	23.8163	22.8345	37.5607	0.0333695
B52	CG3605	0.000243278	123.992	137.946	10.3002	10.5969	326.518	201.553	2076.03	330.505	201.553	2135.84	0.000144731
B52	CG3608	0.0522604	2.0448	3.1067	1.81853	2.10455	48.3365	45.8353	83.3528	49.2105	45.8353	96.4628	0.0191138
B52	CG3621	0.483415	0.127531	0.210222	1.11778	1.16089	85.9694	85.2997	95.346	86.2146	85.2997	99.0238	0.114314
B52	CG3632	0.0612989	1.46137	1.81209	1.49148	1.56191	108.375	104.937	156.511	108.868	104.937	163.901	0.0218918
B52	CG3645	0.0572844	1.83287	2.76676	1.67963	1.89878	63.4431	60.6932	101.942	64.3298	60.6932	115.243	0.0206911
B52	CG3649	0.782988	0.0492186	0.0202596	1.48495	1.40927	1.25065	1.21148	1.79898	1.24453	1.21148	1.70731	0.169371
B52	CG3662	0.0176194	5.34962	4.82181	1.79801	1.73496	440.475	418.225	751.974	438.717	418.225	725.605	0.00744881
B52	CG3663	0.360409	0.545624	0.275215	1.44924	1.22386	25.144	24.4128	35.38	24.7772	24.4128	29.8779	0.0903031
B52	CG3678	0.897351	0.0866931	0.0275014	1.05679	1.03015	220.429	219.598	232.069	220.039	219.598	226.218	0.196533
B52	CG3680	0.0275622	3.66329	3.15981	1.64212	1.57417	433.739	415.934	683.013	431.855	415.934	654.752	0.0110879
B52	CG3689	0.999999	0.00891501	0.138575	1.02896	1.08689	237.651	237.193	244.062	238.567	237.193	257.803	0.307675
B52	CG3703	0.606737	0.324332	0.819276	1.24829	1.48433	41.5088	40.8329	50.9712	42.1513	40.8329	60.6094	0.13694
B52	CG3704	0.0484295	1.92042	2.53509	2.07894	2.39677	43.9055	40.9593	85.1518	44.7734	40.9593	98.1701	0.0179611
B52	CG3706	0.601537	1.00322	0.354459	2.73873	1.50919	7.57442	6.78763	18.5895	7.01804	6.78763	10.2438	0.135983
B52	CG3708	0.109099	1.18892	0.817704	2.32742	2.09256	5.32857	4.89536	11.3936	5.25193	4.89536	10.2438	0.0349697
B52	CG3709	0.612528	0.608066	1.86283	1.30761	1.70634	50.5438	49.5281	64.7634	51.8603	49.5281	84.5117	0.137799
B52	CG3711	0.276232	1.9474	0.801013	1.48658	1.27418	79.5452	77.0459	114.535	78.4542	77.0459	98.1701	0.0730419
B52	CG3726	0.0875943	2.0842	1.26607	2.68971	2.27914	10.4185	9.36375	25.1857	10.1623	9.36375	21.3413	0.0293779
B52	CG3731	0.319974	0.920796	0.433119	1.23434	1.13642	1007.04	991.552	1223.91	1000.57	991.552	1126.82	0.0823011
B52	CG3732	0.0686137	1.90241	1.36856	1.61755	1.50583	151.692	145.693	235.667	150.606	145.693	219.389	0.0239858
B52	CG3735	0.00670764	12.3929	11.0205	2.94581	2.77047	127.403	112.774	332.212	126.085	112.774	312.437	0.00309255
B52	CG3744	0.0286496	3.07723	3.35769	1.53913	1.57214	444.378	428.96	660.226	445.322	428.96	674.386	0.0114404
B52	CG3760	0.00150648	37.7911	35.3614	4.77536	4.49155	176.041	140.643	671.62	173.38	140.643	631.703	0.000759148
B52	CG3773	0.0176071	4.81772	5.75799	2.05502	2.26722	87.4516	81.7049	167.905	88.6074	81.7049	185.243	0.00744532
B52	CG3776	0.00610058	13.6387	11.9271	3.32828	3.21024	50.9937	44.142	146.917	50.6463	44.142	141.706	0.0028325
B52	CG3788	0.388601	0.161377	0.108382	1.16978	1.14101	27.9951	27.6818	32.3817	27.942	27.6818	31.5852	0.096136
B52	CG3793	0.171953	0.449774	0.571405	1.17966	1.21474	202.682	200.283	236.266	203.15	200.283	243.291	0.0499969
B52	CG3800	0.000339886	97.2732	110.879	6.40924	6.58912	9738.47	7157.4	45873.4	9824.3	7157.4	47160.9	0.000194019
B52	CG3808	0.0475053	2.17308	1.8441	1.50719	1.47386	135.324	130.898	197.288	135.033	130.898	192.926	0.0177008
B52	CG3815	0.239897	3.44367	1.29851	1.77034	1.42296	104.7	99.5857	176.3	102.394	99.5857	141.706	0.0650817
B52	CG3817	0.000848111	52.4929	58.8554	4.94365	5.15736	426.021	337.333	1667.66	430.827	337.333	1739.75	0.00044084
B52	CG3860	0.0506519	2.30082	1.78152	1.64429	1.55126	128.561	123.266	202.685	127.796	123.266	191.218	0.0186232
B52	CG3862	0.0144537	6.43334	5.76755	2.23232	2.17531	97.6738	90.2587	201.486	97.3308	90.2587	196.34	0.00622945
B52	CG3880	0.91512	0.437006	1.8011	3.41944	9.04017	1.42558	1.22758	4.19762	1.88557	1.22758	11.0975	0.202334
B52	CG3909	0.064176	1.85687	3.07688	1.69202	2.03493	43.0077	41.111	69.5606	43.9475	41.111	83.658	0.0227133
B52	CG3918	0.0022914	27.5769	25.8242	3.73936	3.57464	208.426	176.241	659.027	206.491	176.241	629.996	0.00113413
B52	CG3939	0.0504637	2.62074	1.88051	1.70893	1.62184	33.0735	31.5809	53.9695	32.8901	31.5809	51.2192	0.0185633
B52	CG3964	0.210834	3.38372	1.33426	2.5235	1.84108	20.9413	19.0104	47.9729	20.0764	19.0104	34.9998	0.0587159
B52	CG3987	0.998755	0.404511	0.06284	1.51136	1.1654	9.8471	9.52248	14.3919	9.62748	9.52248	11.0975	0.270564
B52	CG4020	0.73769	0.0235231	0.0119736	1.05619	1.07397	3.98919	3.9743	4.19762	3.9939	3.9743	4.26827	0.160466
B52	CG40378	0.0126868	8.59487	15.5003	5.66667	8.41929	28.5814	21.7994	123.53	32.5818	21.7994	183.535	0.00554762
B52	CG4038	0.0289764	3.42103	3.01621	1.54767	1.51983	398.796	384.748	595.463	398.082	384.748	584.753	0.0115327
B52	CG4041	0.335581	0.544207	0.284876	1.18925	1.12652	135.819	134.127	159.51	135.258	134.127	151.097	0.0855095
B52	CG4045	0.0871324	1.05253	1.39343	1.39578	1.52784	110.681	107.836	150.515	111.63	107.836	164.755	0.0292717
B52	CG40467	0.999748	0.291263	0.0368754	1.71756	1.22253	2.92669	2.79308	4.79729	2.83451	2.79308	3.41461	0.283494
B52	CG4049	0.0333238	2.74288	3.52833	1.56745	1.68203	208.051	200.468	314.222	209.583	200.468	337.193	0.0130971
B52	CG4061	0.00586675	12.6174	12.8157	3.87229	4.01796	41.5154	34.8433	134.924	41.8537	34.8433	139.999	0.00272951
B52	CG4065	0.00754312	11.3875	10.0421	2.92557	2.78768	86.0378	76.2496	223.074	85.3369	76.2496	212.56	0.00346177
B52	CG4069	0.00138422	37.209	40.196	5.03617	5.22299	131.919	103.949	523.504	133.214	103.949	542.924	0.000701595
B52	CG4095	0.6997	0.0783543	0.165032	1.20713	1.47293	3.52538	3.47736	4.19762	3.587	3.47736	5.12192	0.153221
B52	CG4098	0.322254	1.55063	0.641088	1.4404	1.25128	108.849	105.744	152.314	107.516	105.744	132.316	0.0828225
B52	CG4119	0.00139657	39.3256	37.5945	4.31863	4.08662	320.157	262.157	1132.16	316.102	262.157	1071.33	0.000710763
B52	CG4133	0.477706	0.448775	1.1013	2.14388	3.35714	3.01038	2.79708	5.99661	3.23662	2.79708	9.39019	0.113302
B52	CG4159	0.00402783	17.3898	16.7795	3.33258	3.2692	129.742	112.282	374.188	129.268	112.282	367.071	0.00193135
B52	CG4164	0.345018	0.124404	0.118295	1.03307	1.0389	941.263	939.192	970.251	941.628	939.192	975.726	0.0871834
B52	CG4194	0.173775	2.76284	1.20873	3.82617	2.65697	7.63645	6.42576	24.5861	7.13558	6.42576	17.0731	0.0503972
B52	CG4199	0.947123	0.395745	0.103062	1.19369	1.07765	360.264	355.671	424.56	357.513	355.671	383.29	0.214417
B52	CG4210	0.0021889	27.2409	27.3869	4.15652	4.15347	125.384	103.586	430.556	125.363	103.586	430.241	0.00109226
B52	CG4213	0.0257416	3.83802	3.37068	6.34019	5.93792	4.87361	3.59408	22.7871	4.77723	3.59408	21.3413	0.0104134
B52	CG4221	0.285979	1.12272	0.521626	1.51008	1.32564	49.2731	47.6527	71.9593	48.6872	47.6527	63.1703	0.0752432
B52	CG42232	0.999992	0.0492186	0.491168	1.11943	1.35281	2962.71	2939.3	3290.34	3008.44	2939.3	3976.32	0.3004
B52	CG42233	0.0463792	2.41802	1.92473	2.18256	2.07134	23.1201	21.4306	46.7735	22.9612	21.4306	44.39	0.0173352
B52	CG42238	0.0649354	1.40639	1.81353	1.59634	1.68333	73.8198	70.9972	113.336	74.2315	70.9972	119.511	0.0229138
B52	CG42240	0.0142609	6.22535	9.07375	2.34593	2.67711	102.508	94.0671	220.675	104.585	94.0671	251.828	0.00615058
B52	CG42255	0.116987	0.924273	0.69987	3.5547	3.22021	2.17169	1.85565	6.59627	2.13031	1.85565	5.97557	0.0368743
B52	CG42259	0.205143	0.962961	2.08992	1.98892	2.69966	13.8192	12.9645	25.7854	14.4335	12.9645	34.9998	0.0574523
B52	CG42260	1	0.0218426	0.675492	1.41113	3.51544	1.7464	1.69981	2.39864	1.98486	1.69981	5.97557	0.326067
B52	CG42266	0.0452425	1.96026	2.10191	9.84413	10.7798	1.25881	0.791902	7.79559	1.30821	0.791902	8.53653	0.0169591
B52	CG42271	0.0870572	1.63646	1.10623	1.39127	1.31264	188.845	184.045	256.055	187.88	184.045	241.584	0.0292527
B52	CG42272	0.0544764	1.69391	1.62315	2.84639	2.82699	10.1741	9.05898	25.7854	10.1624	9.05898	25.6096	0.0198239
B52	CG42307	0.414635	0.0904469	0.0732267	1.24782	1.26882	3.41955	3.36397	4.19762	3.42426	3.36397	4.26827	0.101512
B52	CG42327	0.92937	0.273488	1.03327	1.28376	1.75722	24.7494	24.2899	31.1824	25.5161	24.2899	42.6827	0.207026
B52	CG42331	0.0300039	2.95517	3.1625	6.81344	7.49495	2.68667	1.93625	13.1925	2.77464	1.93625	14.5121	0.0118955
B52	CG42342	0.508685	0.265546	0.567153	1.53083	1.93709	7.30054	7.05101	10.7939	7.49151	7.05101	13.6585	0.119186
B52	CG42358	0.999979	0.190757	1.93366	1.17262	1.76001	47.589	47.0476	55.1688	49.4314	47.0476	82.8044	0.297002
B52	CG42359	0.0905396	1.05836	0.89874	1.87639	1.84013	15.2214	14.3812	26.9847	15.1867	14.3812	26.4633	0.0301078
B52	CG42361	0.112906	1.82384	1.05126	4.8066	3.58416	3.28478	2.61991	12.5929	3.07127	2.61991	9.39019	0.0359129
B52	CG42376	1	0.199927	0.00569652	1.15137	1.00643	29.9865	29.6869	34.1807	29.6996	29.6869	29.8779	0.323391
B52	CG42390	0.00101426	47.3663	49.5412	6.40216	6.61176	89.5611	65.8468	421.561	90.4812	65.8468	435.363	0.000522844
B52	CG42395	0.999817	0.175458	0.0202596	1.24499	1.08626	15.1753	14.9314	18.5895	15.0173	14.9314	16.2194	0.28558
B52	CG42399	0.0485575	1.8175	1.98604	2.13483	2.25628	19.9415	18.539	39.5776	20.0916	18.539	41.829	0.0180004
B52	CG42494	0.0424965	2.08838	2.29401	4.43989	4.98983	3.15467	2.56618	11.3936	3.24876	2.56618	12.8048	0.0161168
B52	CG42525	0.263203	0.463405	0.287533	2.64768	2.26148	2.51363	2.26485	5.99661	2.45532	2.26485	5.12192	0.0702899
B52	CG42526	0.0276279	3.21205	3.92654	2.74579	3.05515	21.2115	19.0002	52.1705	21.6034	19.0002	58.0484	0.0111114
B52	CG42541	0.25413	0.955968	0.486249	2.08255	1.73789	8.95307	8.35042	17.3902	8.7612	8.35042	14.5121	0.0684847
B52	CG42553	0.00935082	8.2148	9.42426	2.37131	2.46944	153.18	140.349	332.812	154.098	140.349	346.583	0.00420788
B52	CG42581	0.0898698	1.12161	1.63304	7.93584	11.2972	0.773524	0.528945	4.19762	0.892054	0.528945	5.97557	0.0299535
B52	CG42593	0.959729	0.341814	0.0865634	1.1397	1.06082	552.301	547.205	623.647	549.424	547.205	580.484	0.2203
B52	CG42613	0.367864	0.114406	0.132469	1.06311	1.07512	457.68	455.762	484.526	458.044	455.762	489.997	0.0919022
B52	CG42633	0.100394	1.807	1.0964	Inf	Inf	0.199887	0	2.9983	0.11382	0	1.70731	0.0327711
B52	CG4266	0.128552	0.823423	0.620977	1.21552	1.17861	1257.06	1239.26	1506.35	1254.01	1239.26	1460.6	0.0398099
B52	CG42663	0.0210458	6.38934	4.51307	1.90796	1.72455	318.652	300.465	573.276	314.978	300.465	518.168	0.0087623
B52	CG42668	0.0149871	6.46057	5.60141	1.85103	1.7631	563.836	533.564	987.641	560.708	533.564	940.726	0.00642478
B52	CG4267	0.162863	0.47261	0.426085	1.79803	1.82829	4.91755	4.66914	8.39525	4.92697	4.66914	8.53653	0.0479478
B52	CG42671	0.00998598	10.0113	8.06103	2.31807	2.1608	158.158	145.383	337.009	156.634	145.383	314.144	0.00446762
B52	CG42672	0.0454263	2.1467	2.99952	1.48973	1.62753	160.865	155.779	232.069	162.296	155.779	253.535	0.0170306
B52	CG42676	0.251528	2.51596	1.01038	1.6134	1.34926	117.223	112.618	181.697	115.24	112.618	151.95	0.0678694
B52	CG42684	0.0198235	4.64157	6.58526	1.78274	1.95848	285.262	271.115	483.326	288.439	271.115	530.972	0.00828142
B52	CG42708	0.0098705	10.3353	8.18764	2.05583	1.89734	719.977	672.631	1382.82	712.87	672.631	1276.21	0.0044256
B52	CG42724	0.00123291	39.9196	45.4153	4.97244	5.13295	656.508	519.049	2580.94	662.063	519.049	2664.25	0.000630711
B52	CG42749	0.0971405	1.20793	1.96508	2.37047	2.9775	9.38686	8.60103	20.3885	9.73493	8.60103	25.6096	0.0318991
B52	CG42759	0.145175	2.11658	1.05711	19.0455	9.85908	0.763004	0.346342	6.59627	0.550893	0.346342	3.41461	0.0437662
B52	CG42795	0.316656	0.277352	0.445851	1.78219	2.53705	1.41608	1.3459	2.39864	1.48381	1.3459	3.41461	0.0815524
B52	CG42797	0.212515	0.786679	0.458488	1.21403	1.1516	515.019	507.774	616.451	512.906	507.774	584.753	0.0591344
B52	CG4281	0.0321001	4.03582	2.91726	1.71385	1.58799	208.93	199.438	341.807	207.256	199.438	316.705	0.012653
B52	CG42813	0.0642274	4.83599	2.45332	2.00811	1.63219	195.356	183.054	367.592	190.769	183.054	298.779	0.0227202
B52	CG42816	0.0984761	0.907812	1.19268	3.88011	4.90984	1.65799	1.39093	5.39695	1.75348	1.39093	6.82923	0.0322168
B52	CG4282	0.0573982	3.64927	2.12064	2.00001	1.71923	83.1526	77.9555	155.912	81.6934	77.9555	134.024	0.0207266
B52	CG4291	0.0208697	4.34254	4.19054	2.84644	2.81669	58.2043	51.8249	147.517	58.1015	51.8249	145.975	0.00870052
B52	CG4294	0.00404486	16.6551	17.203	4.66405	4.53514	159.497	128.185	597.862	158.395	128.185	581.338	0.00193798
B52	CG43078	0.287145	0.195722	0.168695	1.3798	1.36642	10.2489	9.99577	13.7922	10.2399	9.99577	13.6585	0.0755229
B52	CG43102	0.999988	0.650144	0.0613195	1.44349	1.0655	23.0961	22.4328	32.3817	22.5308	22.4328	23.9023	0.298911
B52	CG43116	0.787383	0.0871797	0.208017	1.61212	2.29495	1.16145	1.11591	1.79898	1.21225	1.11591	2.56096	0.17039
B52	CG43129	0.992635	0.131105	0.620977	1.9724	4.67971	0.971207	0.91208	1.79898	1.13583	0.91208	4.26827	0.250486
B52	CG4313	0.164671	0.653182	0.468312	1.89236	1.76139	8.72916	8.23902	15.5912	8.65722	8.23902	14.5121	0.0483886
B52	CG43143	0.0349644	2.56151	3.1322	1.47058	1.57508	176.637	171.264	251.857	177.83	171.264	269.754	0.0136533
B52	CG43163	0.207839	0.46597	0.728016	1.893	2.33549	5.03455	4.75167	8.99491	5.17473	4.75167	11.0975	0.0580402
B52	CG4318	0.136233	0.563339	0.598391	3.36744	3.83501	1.03091	0.890379	2.9983	1.05866	0.890379	3.41461	0.0417067
B52	CG43188	0.18688	0.384356	0.458738	1.13391	1.17756	130.19	129.038	146.317	130.565	129.038	151.95	0.0534933
B52	CG43273	1	0.0747561	1.08198	1.16329	1.97654	16.154	15.98	18.5895	17.0204	15.98	31.5852	0.312323
B52	CG4329	0.0402787	2.43835	2.17573	4.57563	4.42	4.54428	3.66955	16.7905	4.50621	3.66955	16.2194	0.0154
B52	CG43320	0.111221	3.40487	1.62351	3.08955	2.3038	18.575	16.3038	50.3715	17.721	16.3038	37.5607	0.0354887
B52	CG43337	0.996266	0.0428964	0.214617	1.06246	1.16806	57.2424	57.005	60.5657	57.6436	57.005	66.585	0.259166
B52	CG43338	0.0796579	1.58408	2.7231	2.593	3.48036	8.95376	8.09416	20.9881	9.43258	8.09416	28.1706	0.0272169
B52	CG43342	0.109696	1.04337	1.6856	1.56697	1.98283	25.0206	24.1093	37.7786	25.689	24.1093	47.8046	0.0351118
B52	CG43343	0.00318016	20.0453	20.9889	4.32398	4.39489	79.9636	65.4582	283.04	80.273	65.4582	287.681	0.00155755
B52	CG43366	0.999999	0.422049	0.0299121	1.83164	1.20344	4.49204	4.25607	7.79559	4.3138	4.25607	5.12192	0.308748
B52	CG43367	0.0344356	2.78922	3.87016	1.53955	1.65647	312.32	301.476	464.137	314.67	301.476	499.387	0.013468
B52	CG43370	0.0721107	2.13439	4.08022	2.44629	3.22126	21.5013	19.6105	47.9729	22.5145	19.6105	63.1703	0.0249848
B52	CG4338	0.0038168	17.1327	18.5624	4.19617	4.49709	61.0217	50.3032	211.081	62.0308	50.3032	226.218	0.00184695
B52	CG43394	0.983315	0.139655	0.592814	1.39445	1.84329	12.3576	12.041	16.7905	12.7179	12.041	22.195	0.238255
B52	CG43427	0.00969843	9.53694	8.16297	2.48717	2.36319	113.157	102.95	256.055	112.307	102.95	243.291	0.00435518
B52	CG43444	0.967933	0.00208769	0.0121921	1.03559	1.03816	1077.27	1074.72	1112.97	1077.45	1074.72	1115.72	0.225421
B52	CG4360	0.0300735	3.20734	2.91162	1.49896	1.47045	675.429	653.685	979.846	674.187	653.685	961.214	0.0119336
B52	CG4364	0.000321074	104.711	107.878	7.42487	7.27163	510.916	357.703	2655.9	507.261	357.703	2601.08	0.000182728
B52	CG4365	0.0423642	2.58855	4.07978	1.8125	2.1474	54.059	51.2812	92.9474	55.2039	51.2812	110.121	0.0160656
B52	CG43672	0.0327831	4.65577	3.08911	6.04192	4.82498	5.43704	4.06925	24.5861	5.1069	4.06925	19.634	0.0128871
B52	CG43676	0.0107011	7.33398	8.5491	4.67974	5.09702	23.7766	19.0928	89.3494	24.3077	19.0928	97.3165	0.00475757
B52	CG43689	0.0377948	2.62971	3.79122	1.54475	1.65725	3941.64	3803.51	5875.48	3970.17	3803.51	6303.38	0.014609
B52	CG43783	0.412872	0.0801677	0.0917963	1.00083	1.02798	94.6734	94.6681	94.7464	94.8447	94.6681	97.3165	0.101082
B52	CG43896	0.535012	0.0850242	0.139997	2.04129	2.90591	0.314158	0.293765	0.599661	0.331091	0.293765	0.853653	0.12419
B52	CG43897	0.176109	0.510755	0.74176	3.24864	4.04656	1.69808	1.47671	4.79729	1.77663	1.47671	5.97557	0.0509221
B52	CG43902	0.147117	0.837972	1.45871	5.92879	10.128	0.671891	0.505719	2.9983	0.813466	0.505719	5.12192	0.0442178
B52	CG43921	0.0672909	1.57397	1.28303	1.49061	1.43622	136.267	131.952	196.689	135.789	131.952	189.511	0.0235599
B52	CG43986	0.0971964	0.93311	1.24529	1.34265	1.39455	212.881	208.127	279.442	213.601	208.127	290.242	0.0319152
B52	CG44014	0.0698009	1.72711	1.28917	1.47069	1.40718	102.611	99.4888	146.317	102.19	99.4888	139.999	0.0243213
B52	CG44098	0.558312	0.0788565	0.134333	1.93473	2.7542	0.32926	0.309946	0.599661	0.346193	0.309946	0.853653	0.128487
B52	CG4415	0.0649758	2.30645	1.54952	4.99446	3.72424	6.38561	5.04274	25.1857	5.95858	5.04274	18.7804	0.0229313
B52	CG4424	0.819462	0.676967	0.207372	1.5958	1.1725	24.2234	23.298	37.179	23.566	23.298	27.3169	0.17758
B52	CG44245	0.00575459	13.3781	12.6464	12.254	12.3452	5.5673	3.18082	38.9779	5.58664	3.18082	39.2681	0.00268301
B52	CG44247	0.725191	0.164409	0.400506	1.21554	1.58619	6.00502	5.91995	7.19593	6.1513	5.91995	9.39019	0.157971
B52	CG44250	0.111746	0.757107	0.937459	1.92383	2.13009	8.93427	8.41595	16.1908	9.05	8.41595	17.9267	0.0356203
B52	CG44252	0.107672	0.819663	0.731552	2.36195	2.44537	3.04629	2.79272	6.59627	3.06182	2.79272	6.82923	0.034588
B52	CG44254	0.0335974	4.7428	3.0822	2.23265	1.97346	44.4708	41.0939	91.7481	43.7608	41.0939	81.0971	0.0131796
B52	CG44303	0.550329	0.0309277	0.0416544	1.21181	1.2546	5.5202	5.44334	6.59627	5.53573	5.44334	6.82923	0.126778
B52	CG44385	0.752579	1.75092	0.493623	8.44214	4.00597	0.956464	0.639286	5.39695	0.767398	0.639286	2.56096	0.163346
B52	CG4452	0.0719347	1.42307	1.18326	1.65038	1.58662	58.3815	55.9554	92.3477	58.1437	55.9554	88.7799	0.0249342
B52	CG44836	0.0702457	1.26849	1.24564	3.51182	3.74946	2.39219	2.04906	7.19593	2.42465	2.04906	7.68288	0.0244536
B52	CG45067	0.994406	0.168509	0.0313721	1.51258	1.25606	4.91997	4.7574	7.19593	4.83861	4.7574	5.97557	0.25424
B52	CG4511	0.0706422	1.23027	1.40028	1.31526	1.33794	453.405	444.072	584.069	454.076	444.072	594.143	0.0245698
B52	CG45186	0.166342	0.496361	0.667847	1.1568	1.18473	2300	2276.21	2633.11	2304.24	2276.21	2696.69	0.048833
B52	CG4538	0.0309676	2.92588	2.93575	1.568	1.56752	282.605	272.294	426.958	282.596	272.294	426.827	0.0122567
B52	CG4546	0.0678097	2.90587	1.72725	4.4693	3.39324	4.95617	4.02519	17.9898	4.66741	4.02519	13.6585	0.0237235
B52	CG4552	0.513452	0.132637	0.23113	1.13358	1.16675	148.371	147.062	166.706	148.697	147.062	171.584	0.120117
B52	CG4553	0.0118842	10.2852	7.39677	4.2384	3.64937	21.3315	17.5439	74.3579	20.6425	17.5439	64.024	0.00523744
B52	CG4554	0.0844247	1.21751	1.79448	1.4195	1.50381	466.827	454.127	644.635	469.38	454.127	682.923	0.0285229
B52	CG4557	0.0057454	19.6959	13.5406	3.69435	3.08178	90.1845	76.452	282.44	87.0624	76.452	235.608	0.00268061
B52	CG4562	0.999794	0.0607803	0.437898	1.78774	3.1812	1.41218	1.34172	2.39864	1.53682	1.34172	4.26827	0.284898
B52	CG4586	0.988663	1.84364	0.323372	2.14629	1.31936	13.2328	12.2934	26.3851	12.5551	12.2934	16.2194	0.24435
B52	CG4593	0.0156184	5.5656	7.53231	2.17039	2.48795	79.5258	73.7698	160.109	81.0875	73.7698	183.535	0.00667826
B52	CG4598	0.0410274	2.19124	2.67732	1.54545	1.61528	184.577	178.1	275.244	185.406	178.1	287.681	0.0156637
B52	CG4603	0.467869	0.0870297	0.06001	1.09475	1.07892	93.1561	92.5714	101.343	93.0585	92.5714	99.8774	0.11168
B52	CG4610	0.0620264	3.26092	1.92378	1.67709	1.49474	128.927	123.358	206.883	127.427	123.358	184.389	0.0221213
B52	CG4611	0.00549217	13.2794	13.4927	2.74237	2.78776	180.12	161.375	442.55	180.608	161.375	449.875	0.00256141
B52	CG4622	0.00656573	11.1031	12.5369	3.79884	4.12154	38.5853	32.5178	123.53	39.2849	32.5178	134.024	0.00303303
B52	CG4630	0.946688	0.25429	0.994624	1.08871	1.30894	106.933	106.304	115.735	108.494	106.304	139.145	0.214182
B52	CG4678	1	0.00981298	0.287204	1.02397	2.91537	0.586558	0.585622	0.599661	0.660401	0.585622	1.70731	0.322779
B52	CG4679	0.0756917	1.23227	1.11306	1.2897	1.28558	211.852	207.838	268.048	211.795	207.838	267.194	0.0260097
B52	CG4681	0.765873	1.42636	0.412002	6.62036	3.1415	1.12065	0.815204	5.39695	0.931588	0.815204	2.56096	0.166279
B52	CG4707	0.138439	0.709539	1.05179	1.35099	1.46412	70.4095	68.7996	92.9474	70.9284	68.7996	100.731	0.0422311
B52	CG4709	0.00124134	40.7647	42.3131	12.2712	12.2732	36.5456	20.8663	256.055	36.5483	20.8663	256.096	0.000633115
B52	CG4725	1	0.132637	0.00719146	1.29606	1.10701	9.43625	9.25361	11.9932	9.31962	9.25361	10.2438	0.310099
B52	CG4729	0.0327524	2.99066	2.68317	1.57345	1.54896	196.258	189.032	297.432	195.95	189.032	292.803	0.0128765
B52	CG4730	0.0465559	1.99407	1.91149	1.63843	1.67455	44.6442	42.8217	70.1603	44.7474	42.8217	71.7069	0.0173906
B52	CG4733	0.0742153	2.64351	1.5788	2.94316	2.43007	11.5071	10.1874	29.983	11.1586	10.1874	24.7559	0.0256123
B52	CG4747	0.150643	0.501188	0.487488	1.16429	1.15964	915.363	905.446	1054.2	915.083	905.446	1049.99	0.045014
B52	CG4749	0.0224307	3.86442	4.3469	2.20172	2.35627	41.4794	38.4028	84.5522	41.8751	38.4028	90.4873	0.00924782
B52	CG4769	0.197147	0.707693	0.441976	1.19057	1.14126	634.023	626.07	745.378	631.965	626.07	714.508	0.0557042
B52	CG4806	0.000182221	149.929	172.365	11.9669	12.6822	359.826	207.857	2487.39	369.738	207.857	2636.08	0.000114286
B52	CG4820	0.0196558	6.25251	4.62959	2.94941	2.65503	31.2445	27.6509	81.5538	30.7018	27.6509	73.4142	0.00821726
B52	CG4829	0.00673264	11.4838	11.2096	2.53314	2.47699	215	195.063	494.12	214.27	195.063	483.168	0.00310383
B52	CG4849	0.00090263	50.1565	56.2444	5.59981	6.06034	143.562	109.87	615.252	146.935	109.87	665.85	0.000466795
B52	CG4854	0.119416	0.686372	0.820097	1.92896	2.04189	12.8749	12.124	23.3868	12.9662	12.124	24.7559	0.0375249
B52	CG4858	0.0174062	4.88111	5.95013	1.83254	1.96153	180.985	171.468	314.222	182.46	171.468	336.339	0.00737484
B52	CG4860	0.0433006	5.4338	3.02466	1.97704	1.65568	402.545	377.928	747.177	394.448	377.928	625.728	0.0163632
B52	CG4872	0.0844692	1.03483	1.00592	1.45367	1.47813	44.6242	43.3142	62.9644	44.6948	43.3142	64.024	0.0285395
B52	CG4882	0.155572	0.573929	0.463571	1.20862	1.20879	98.0958	96.7502	116.934	98.0969	96.7502	116.951	0.046263
B52	CG4887	0.000561766	71.6951	73.3314	6.13233	5.92448	452.533	337.169	2067.63	447.861	337.169	1997.55	0.000305045
B52	CG4896	0.00092751	49.9573	53.3911	5.60657	5.74628	179.228	137.119	768.765	180.506	137.119	787.922	0.000477802
B52	CG4901	0.0172431	4.93804	6.14398	1.97633	2.1988	105.03	98.612	194.89	106.493	98.612	216.828	0.00730729
B52	CG4908	0.104335	0.883315	0.760237	1.44452	1.44252	28.6378	27.8136	40.1773	28.6341	27.8136	40.1217	0.0337271
B52	CG4925	0.00350732	18.1376	21.6748	4.04225	4.39052	109.916	91.3825	369.391	112.038	91.3825	401.217	0.00170167
B52	CG4936	0.134078	3.16956	1.45678	1.70938	1.44033	117.934	112.609	192.491	115.915	112.609	162.194	0.041144
B52	CG4945	0.0454371	2.35303	1.94129	4.35033	3.99546	5.22754	4.27312	18.5895	5.12645	4.27312	17.0731	0.0170334
B52	CG4951	0.00977892	13.9556	9.20374	2.96712	2.50636	96.7004	85.4892	253.656	94.0744	85.4892	214.267	0.00438441
B52	CG4957	0.524036	1.17428	3.97812	1.7238	2.53483	33.1839	31.6564	54.5691	34.8955	31.6564	80.2434	0.122078
B52	CG4968	0.200907	0.35227	0.312933	1.25631	1.24096	71.3648	70.1658	88.1501	71.2929	70.1658	87.0726	0.0564797
B52	CG4970	0.0161424	5.56257	5.28463	3.17868	3.15613	25.7101	22.4494	71.3596	25.6763	22.4494	70.8532	0.00687018
B52	CG4996	0.166106	0.751294	0.503365	1.25176	1.2002	165.612	162.878	203.885	165.052	162.878	195.487	0.0487684
B52	CG5003	0.152688	1.82479	0.933532	1.37236	1.24132	167.031	162.985	223.673	165.607	162.985	202.316	0.0455421
B52	CG5009	0.0100638	8.12478	8.08838	2.46714	2.46822	105.933	96.4945	238.065	105.94	96.4945	238.169	0.00450277
B52	CG5033	0.00260922	24.827	23.3554	3.17027	3.04364	354.441	309.641	981.644	351.827	309.641	942.433	0.00129013
B52	CG5045	0.0473306	2.31698	1.87435	1.53121	1.47212	171.118	165.266	253.057	170.467	165.266	243.291	0.017629
B52	CG5068	0.0623046	1.4853	1.39769	1.52298	1.5126	87.6057	84.6542	128.927	87.5471	84.6542	128.048	0.0221892
B52	CG5071	0.0793844	1.33013	2.00501	3.12074	4.18123	3.72845	3.26661	10.1942	3.9594	3.26661	13.6585	0.0271253
B52	CG5079	0.268512	0.271763	0.20414	2.60666	2.47383	0.764069	0.690147	1.79898	0.757958	0.690147	1.70731	0.0713656
B52	CG5080	0.00577038	18.8415	13.2685	2.67397	2.29932	456.441	410.617	1097.98	446.185	410.617	944.141	0.00268964
B52	CG5111	0.145412	0.545862	0.671724	2.3732	2.65445	3.86137	3.53753	8.39525	3.9277	3.53753	9.39019	0.0438186
B52	CG5114	0.020272	6.29419	4.56859	2.0671	1.88039	138.588	129.383	267.449	136.977	129.383	243.291	0.00845135
B52	CG5118	0.0102906	7.65718	9.68147	1.96029	2.09917	437.456	411.136	805.944	441.263	411.136	863.044	0.00458837
B52	CG5142	0.365244	0.512078	1.14829	1.9671	2.80029	5.19199	4.87752	9.59457	5.46291	4.87752	13.6585	0.0913854
B52	CG5144	0.249821	0.333056	0.495099	1.11658	1.1778	165.074	163.801	182.896	165.743	163.801	192.926	0.0674447
B52	CG5149	0.328484	0.329397	0.585942	1.11649	1.22261	91.4735	90.7686	101.343	92.1157	90.7686	110.975	0.0840431
B52	CG5167	0.999398	0.255738	0.0358267	1.146	1.05147	159.035	157.502	180.498	158.043	157.502	165.609	0.276818
B52	CG5168	0.0390273	2.6007	2.24262	1.43992	1.41398	290.208	281.939	405.97	289.72	281.939	398.656	0.0150152
B52	CG5180	0.759462	0.718886	0.232403	1.36832	1.18567	51.6357	50.3982	68.961	51.0221	50.3982	59.7557	0.164802
B52	CG5195	0.046212	1.91114	2.21126	2.61748	2.8494	12.9439	11.684	30.5827	13.1246	11.684	33.2925	0.0172884
B52	CG5204	0.0399452	2.23851	2.35362	2.40545	2.63408	10.6334	9.72239	23.3868	10.7815	9.72239	25.6096	0.01528
B52	CG5205	0.00805602	12.2081	9.59544	2.27329	2.07691	398.644	367.452	835.327	393.833	367.452	763.166	0.00368647
B52	CG5210	0.102062	8.23771	3.19833	2.01815	1.55635	456.281	427.279	862.312	443.127	427.279	664.996	0.0331744
B52	CG5213	0.966464	1.1632	0.248913	2.48909	1.60023	8.20978	7.46837	18.5895	7.76722	7.46837	11.9511	0.224247
B52	CG5267	0.26634	0.551214	1.0795	5.08009	9.64242	0.450448	0.354124	1.79898	0.558157	0.354124	3.41461	0.0709526
B52	CG5270	0.136495	0.567402	0.566644	1.21973	1.21664	293.315	289.08	352.6	293.255	289.08	351.705	0.0417771
B52	CG5290	0.027657	4.2267	7.32292	1.68016	2.00035	207.438	198.44	333.411	211.674	198.44	396.949	0.0111232
B52	CG5292	0.414253	1.47235	0.56392	1.99763	1.52997	54.7458	51.3318	102.542	53.1454	51.3318	78.5361	0.101428
B52	CG5316	0.997266	0.0589484	0.308951	1.00394	1.1137	178.643	178.596	179.299	179.949	178.596	198.901	0.262714
B52	CG5323	0.0377243	2.92752	2.35218	1.59511	1.52367	210.279	202.254	322.617	209.315	202.254	308.169	0.0145914
B52	CG5342	0.887291	0.427617	1.66278	2.03065	3.49934	5.9963	5.61078	11.3936	6.54567	5.61078	19.634	0.193508
B52	CG5355	0.0140677	6.38056	5.94148	1.89325	1.85014	305.058	287.913	545.092	304.23	287.913	532.68	0.0060671
B52	CG5380	0.187484	0.613532	1.03497	1.32107	1.44663	84.382	82.6137	109.138	85.0735	82.6137	119.511	0.0536313
B52	CG5384	0.00290122	20.9181	24.5026	3.0818	3.26295	310.443	272.608	840.125	313.735	272.608	889.507	0.00142232
B52	CG5412	0.106415	2.35246	1.26958	1.69682	1.4813	106.138	101.426	172.103	104.681	101.426	150.243	0.0342563
B52	CG5414	0.0540848	1.86125	2.70546	1.60918	1.85787	49.2485	47.3264	76.1569	50.0331	47.3264	87.9263	0.0196927
B52	CG5435	0.093889	1.31847	0.941282	5.80882	4.96153	1.36328	1.03233	5.99661	1.30497	1.03233	5.12192	0.0310701
B52	CG5482	0.0729291	1.39117	2.03865	1.37738	1.45433	444.085	433.187	596.662	446.307	433.187	629.996	0.0252311
B52	CG5498	0.185066	0.383245	0.359963	1.29195	1.28314	61.041	59.8756	77.3562	61.0058	59.8756	76.8288	0.053089
B52	CG5514	0.00251167	23.9392	25.0782	3.60499	3.7043	133.342	113.611	409.568	134.094	113.611	420.851	0.00124507
B52	CG5515	0.000772148	56.1861	61.4999	5.59998	5.77095	253.397	193.927	1085.99	255.607	193.927	1119.14	0.000402951
B52	CG5516	0.0401266	2.70579	2.2061	1.55825	1.51031	131.321	126.609	197.288	130.916	126.609	191.218	0.0153413
B52	CG5527	0.0775183	1.2499	1.07998	2.02483	1.95264	19.616	18.3615	37.179	19.5277	18.3615	35.8534	0.026586
B52	CG5537	0.864167	0.700742	0.201583	1.26327	1.10236	371.927	365.512	461.739	368.006	365.512	402.924	0.187352
B52	CG5539	0.0479862	3.92315	2.37587	22.8289	13.541	1.54785	0.630423	14.3919	1.1575	0.630423	8.53653	0.0178536
B52	CG5543	0.0411067	2.48779	2.13206	1.53374	1.48469	263.18	254.137	389.779	262.349	254.137	377.315	0.0156979
B52	CG5548	0.0100659	11.2398	8.32831	2.96539	2.5503	287.724	254.392	754.373	280.685	254.392	648.777	0.00450348
B52	CG5554	0.00449113	16.6799	15.2003	2.56208	2.42887	593.346	537.384	1376.82	588.574	537.384	1305.24	0.00213485
B52	CG5555	0.0887085	0.946744	1.05908	1.42313	1.4545	84.4843	82.1665	116.934	84.6562	82.1665	119.511	0.0296644
B52	CG5577	0.893231	0.274283	0.0840134	1.63361	1.32888	5.35616	5.13908	8.39525	5.25176	5.13908	6.82923	0.195446
B52	CG5589	0.0139138	6.42305	6.00131	2.2801	2.22354	108.753	100.202	228.471	108.376	100.202	222.804	0.00599987
B52	CG5590	0.0397334	2.24046	2.41283	1.55866	1.58705	175.187	168.896	263.251	175.506	168.896	268.047	0.0152177
B52	CG5592	1	0.484984	0.0194904	2.96956	1.40912	1.3707	1.21161	3.59796	1.24466	1.21161	1.70731	0.321237
B52	CG5604	0.0127918	6.28892	7.55818	1.99588	2.08836	1106.33	1037.45	2070.63	1112.73	1037.45	2166.57	0.00558218
B52	CG5608	0.179532	0.751294	0.481446	1.40823	1.31559	83.9836	81.7585	115.135	83.4786	81.7585	107.56	0.0517871
B52	CG5613	1	0.605834	0.00241234	1.83792	1.10693	8.95695	8.48307	15.5912	8.54355	8.48307	9.39019	0.33652
B52	CG5618	0.00577801	12.3147	14.297	3.16071	3.42516	77.2706	67.5415	213.479	78.4614	67.5415	231.34	0.00269385
B52	CG5639	0.225464	0.387369	0.283706	1.27683	1.23839	43.5268	42.7381	54.5691	43.4173	42.7381	52.9265	0.0620152
B52	CG5641	0.0262072	3.35182	3.59555	1.90378	1.97178	107.87	101.74	193.69	108.331	101.74	200.609	0.0105936
B52	CG5645	0.000358089	93.7671	114.703	9.41966	10.8277	167.777	107.459	1012.23	177.864	107.459	1163.53	0.000201214
B52	CG5660	0.0570069	3.87087	2.20564	2.43626	2.01784	29.6679	27.0754	65.9627	28.9126	27.0754	54.6338	0.0205993
B52	CG5674	0.0170228	8.06495	5.5844	2.26311	2.0074	131.864	121.622	275.244	129.79	121.622	244.145	0.00723914
B52	CG5703	0.00253863	23.3028	25.7343	3.85369	4.03356	128.721	108.147	416.764	130.018	108.147	436.217	0.00126074
B52	CG5705	0.0436898	6.79511	3.5109	2.89563	2.22881	40.1212	35.6198	103.142	38.5378	35.6198	79.3898	0.0164862
B52	CG5706	0.0186405	5.85475	4.65618	2.1974	2.03537	110.505	102.336	224.873	109.4	102.336	208.291	0.00784658
B52	CG5721	0.0220072	4.39322	3.9196	1.66376	1.62928	289.431	277.166	461.139	288.794	277.166	451.583	0.00910009
B52	CG5728	0.00362379	17.8197	23.0177	2.72787	2.97597	569.727	510.878	1393.61	578.177	510.878	1520.36	0.00175991
B52	CG5734	0.998115	0.40358	0.0658596	1.18283	1.0643	217.576	214.956	254.256	215.878	214.956	228.779	0.266476
B52	CG5757	0.0613683	2.8018	1.7667	1.68771	1.5289	89.9272	85.985	145.118	89.0168	85.985	131.463	0.0219271
B52	CG5780	0.999996	1.37754	0.113582	3.43483	1.39705	4.26134	3.66623	12.5929	3.76328	3.66623	5.12192	0.302556
B52	CG5787	0.00369026	18.8415	17.8897	2.67807	2.5748	609.716	548.369	1468.57	605.941	548.369	1411.94	0.00179037
B52	CG5789	0.0117836	8.91296	7.07115	2.14085	1.97217	308.34	286.546	613.453	305.118	286.546	565.119	0.00519051
B52	CG5792	0.00430775	16.7957	15.8069	3.21366	3.1424	109.423	95.3514	306.427	108.97	95.3514	299.632	0.00204867
B52	CG5800	0.00267517	26.8649	22.6741	3.55573	3.23667	222.251	189.896	675.218	218.212	189.896	614.63	0.00132072
B52	CG5808	0.0030896	20.6504	29.1793	3.30383	3.93057	189.909	164.625	543.892	196.788	164.625	647.069	0.00151639
B52	CG5815	0.00185397	29.4042	34.2882	4.37869	4.69459	146.822	119.831	524.703	149.346	119.831	562.558	0.000923513
B52	CG5835	0.50934	0.50162	1.32336	1.37224	1.82324	20.1527	19.6647	26.9847	20.7439	19.6647	35.8534	0.119292
B52	CG5844	0.00098957	49.3148	49.164	5.61023	5.53792	146.306	111.911	627.845	145.767	111.911	619.752	0.000511977
B52	CG5853	0.999484	0.117874	0.777954	1.32198	2.13283	6.95019	6.80414	8.99491	7.31801	6.80414	14.5121	0.277988
B52	CG5862	0.000771637	59.714	56.6396	7.04514	6.60727	141.751	101.034	711.797	138.802	101.034	667.557	0.000401528
B52	CG5872	0.0349311	3.18469	2.54499	2.10935	1.98261	47.6287	44.3488	93.5471	47.254	44.3488	87.9263	0.01364
B52	CG5877	0.042351	2.34738	2.07136	1.68559	1.66986	63.6149	60.8344	102.542	63.551	60.8344	101.585	0.0160616
B52	CG5882	0.0364133	2.74655	2.40627	14.5606	13.3251	1.09782	0.576573	8.39525	1.05033	0.576573	7.68288	0.014112
B52	CG5886	0.000998334	46.9973	51.9732	8.38588	8.66235	94.1258	63.0704	528.901	95.2883	63.0704	546.338	0.00051716
B52	CG5913	0.00185367	29.5457	33.4169	3.72832	3.88205	299.398	253.322	944.466	301.994	253.322	983.409	0.000922511
B52	CG5919	0.0572006	1.61931	2.12145	1.62072	1.77063	49.7047	47.7296	77.3562	50.1817	47.7296	84.5117	0.0206621
B52	CG5937	0.139773	0.585343	0.736291	1.9126	2.1495	6.31953	5.9571	11.3936	6.41361	5.9571	12.8048	0.0426088
B52	CG5955	0.15113	1.12629	0.674	1.50748	1.36563	45.2372	43.7568	65.9627	44.8234	43.7568	59.7557	0.0451345
B52	CG5961	0.390229	0.122412	0.0914928	1.11072	1.0896	339.374	336.887	374.188	338.899	336.887	367.071	0.0964402
B52	CG5964	0.0235801	3.92357	3.70203	6.74954	6.56182	5.03886	3.64263	24.5861	4.99327	3.64263	23.9023	0.00966844
B52	CG5986	0.0531868	2.54106	4.60125	1.45152	1.66024	563.019	546.567	793.351	570.624	546.567	907.434	0.0194195
B52	CG5987	0.245624	0.96432	2.25286	2.66412	4.29821	3.75088	3.37631	8.99491	4.1187	3.37631	14.5121	0.0664912
B52	CG5989	0.0341618	2.58364	2.87518	1.73952	1.84898	54.2585	51.7092	89.9491	54.6358	51.7092	95.6092	0.0133639
B52	CG6013	0.00031985	102.185	113.147	18.5366	19.4361	75.6441	34.8734	646.434	77.7352	34.8734	677.801	0.00018227
B52	CG6026	1	0.027731	0.732985	2.17094	9.2714	0.297784	0.276221	0.599661	0.428537	0.276221	2.56096	0.323775
B52	CG6028	0.168167	0.426208	0.432363	1.1637	1.19139	76.0556	75.2345	87.5505	76.1944	75.2345	89.6336	0.0492127
B52	CG6041	0.131012	0.667782	0.886919	2.38391	2.82803	3.29703	3.01854	7.19593	3.38641	3.01854	8.53653	0.0404035
B52	CG6045	0.0211563	4.6608	7.126	1.86837	2.1579	143.963	136.085	254.256	146.589	136.085	293.657	0.00880079
B52	CG6051	0.0136046	6.00983	6.76227	1.85779	1.91437	336.122	317.941	590.666	337.322	317.941	608.655	0.00589023
B52	CG6066	0.00176205	32.4074	32.2546	5.21179	5.0908	123.492	96.4191	502.516	122.715	96.4191	490.851	0.00088063
B52	CG6071	0.00731941	10.1961	12.8287	3.98837	4.80098	24.5217	20.4479	81.5538	25.6294	20.4479	98.1701	0.0033638
B52	CG6073	0.0114789	6.98086	9.00455	2.68191	3.05072	53.2144	47.8492	128.327	54.3909	47.8492	145.975	0.00506548
B52	CG6094	0.0879714	1.54677	1.06923	1.61811	1.50679	51.32	49.2889	79.7549	50.9542	49.2889	74.2678	0.0294866
B52	CG6115	0.00855934	8.91353	11.1695	2.294	2.45745	226.027	208.077	477.33	228.295	208.077	511.338	0.00389251
B52	CG6178	0.0259011	3.98166	3.35806	1.8052	1.73529	135.806	128.888	232.668	135.206	128.888	223.657	0.0104737
B52	CG6179	0.00782856	11.3177	9.69241	3.49509	3.27134	65.4365	56.1041	196.089	64.5996	56.1041	183.535	0.00357818
B52	CG6182	0.0087356	8.76089	9.65457	3.21002	3.43879	42.4378	36.9882	118.733	43.0019	36.9882	127.194	0.00397645
B52	CG6195	0.0147017	5.69229	7.16491	2.3622	2.67134	59.2587	54.3253	128.327	60.3783	54.3253	145.121	0.00632012
B52	CG6197	0.000664686	65.9263	62.9815	6.6081	6.20616	197.857	144.014	951.661	193.998	144.014	893.775	0.000351187
B52	CG6201	0.721125	1.01312	0.323372	3.01314	1.97972	2.93442	2.5872	7.79559	2.75618	2.5872	5.12192	0.157213
B52	CG6216	0.436077	0.666535	0.295278	4.95164	3.52448	0.612029	0.484413	2.39864	0.56594	0.484413	1.70731	0.10573
B52	CG6227	0.00028041	117.427	117.347	8.88206	8.372	332.555	218.002	1936.3	325.142	218.002	1825.11	0.000163426
B52	CG6254	0.0427214	2.18239	2.08303	1.7356	1.74218	56.5422	53.899	93.5471	56.5659	53.899	93.9019	0.0161815
B52	CG6259	0.00448566	15.0389	16.8992	2.56421	2.64552	444.697	402.703	1032.62	446.88	402.703	1065.36	0.00213315
B52	CG6276	0.0381879	2.457	2.32082	1.79426	1.78657	64.399	61.1605	109.738	64.3677	61.1605	109.268	0.0147352
B52	CG6279	0.8844	0.81324	0.222823	3.87514	2.06869	2.9505	2.47593	9.59457	2.65233	2.47593	5.12192	0.192604
B52	CG6287	0.282635	0.371096	0.630734	1.49934	1.70752	14.4642	13.9982	20.9881	14.6585	13.9982	23.9023	0.0744802
B52	CG6324	0.032921	2.7906	3.61743	3.71985	4.53894	6.66526	5.6422	20.9881	6.97336	5.6422	25.6096	0.0129444
B52	CG6340	0.00713863	12.2588	10.475	2.9529	2.75603	138.626	122.657	362.195	137.017	122.657	338.047	0.00328232
B52	CG6345	0.99977	1.35929	0.161236	2.18734	1.35383	13.6091	12.6109	27.5844	12.9084	12.6109	17.0731	0.284156
B52	CG6357	0.0816244	1.71024	3.1131	1.85106	2.21946	555.61	525.779	973.249	568.523	525.779	1166.94	0.0277477
B52	CG6388	0.00461304	19.0952	15.0517	3.54444	3.15243	108.637	92.8817	329.214	106.21	92.8817	292.803	0.0021894
B52	CG6405	0.151865	0.62692	0.913663	2.25388	2.75017	4.03616	3.7248	8.39525	4.1594	3.7248	10.2438	0.0453316
B52	CG6412	0.0761089	1.58725	2.65041	1.35634	1.54133	157.059	153.415	208.082	158.951	153.415	236.462	0.0261472
B52	CG6418	0.001564	37.8517	34.0647	4.47284	4.09543	246.174	199.894	894.094	241.145	199.894	818.654	0.000788475
B52	CG6424	0.0208374	4.16997	4.4357	1.63338	1.64572	654.683	628.159	1026.02	655.2	628.159	1033.77	0.00869212
B52	CG6441	0.0780934	1.8834	3.52946	3.19861	4.90368	5.58882	4.87436	15.5912	6.14289	4.87436	23.9023	0.0267667
B52	CG6443	0.397358	3.65248	1.17281	1.99921	1.47844	49.2691	46.192	92.3477	47.6654	46.192	68.2923	0.0978476
B52	CG6453	0.0076211	10.2508	10.2338	2.14848	2.11643	644.828	598.967	1286.87	643.548	598.967	1267.68	0.00349137
B52	CG6454	0.00837964	9.10722	9.98487	2.19175	2.26413	233.612	216.417	474.332	234.656	216.417	489.997	0.00382297
B52	CG6455	0.0061927	12.5725	11.9487	2.49954	2.44018	230.113	209.2	522.904	229.286	209.2	510.485	0.00288368
B52	CG6463	0.99963	0.788243	0.10354	1.29405	1.0499	135.13	132.532	171.503	132.973	132.532	139.145	0.280693
B52	CG6470	0.980144	0.046709	0.180026	1.43824	2.04742	1.71649	1.66776	2.39864	1.78422	1.66776	3.41461	0.235136
B52	CG6495	0.108369	1.8581	1.08049	2.04858	1.76744	31.0051	28.9793	59.3664	30.462	28.9793	51.2192	0.0347685
B52	CG6509	0.00745041	10.7651	10.2409	2.25697	2.16929	541.647	499.767	1127.96	538.725	499.767	1084.14	0.00342134
B52	CG6511	0.0446806	2.01156	2.07136	1.52482	1.54167	143.273	138.43	211.081	143.429	138.43	213.413	0.0168045
B52	CG6512	0.0239851	3.8882	3.63509	1.56531	1.53093	1346.44	1297.54	2031.05	1343.47	1297.54	1986.45	0.00980194
B52	CG6540	0.0189564	7.42864	5.08334	2.10681	1.87322	181.546	169.07	356.198	178.913	169.07	316.705	0.00794707
B52	CG6550	0.045353	2.06383	1.95842	1.63433	1.67896	37.0959	35.5908	58.1671	37.2018	35.5908	59.7557	0.0170054
B52	CG6567	0.0308464	3.63052	2.88465	1.83798	1.76212	67.5195	63.9471	117.533	67.1961	63.9471	112.682	0.0122181
B52	CG6569	0.0907886	1.53451	1.04721	2.55249	2.25874	9.59214	8.69248	22.1874	9.42192	8.69248	19.634	0.0301821
B52	CG6597	0.0243116	3.57679	4.0393	1.62383	1.67317	323.103	310.202	503.715	324.124	310.202	519.021	0.00992842
B52	CG6607	0.00207808	30.0826	27.767	6.43769	5.94249	125.266	91.9375	591.865	122.231	91.9375	546.338	0.00103751
B52	CG6617	0.0133927	6.06728	7.08674	1.83691	1.91107	494.248	468.129	859.913	496.563	468.129	894.629	0.00581311
B52	CG6621	0.00179373	33.8808	31.0322	5.00978	4.72672	103.911	81.9931	410.768	102.364	81.9931	387.559	0.000894531
B52	CG6638	0.0272786	3.21674	3.61615	1.85039	1.96578	68.8313	65.1384	120.532	69.3324	65.1384	128.048	0.0109855
B52	CG6639	0.0242452	3.63491	3.79274	4.5935	4.90434	6.4728	5.22182	23.9864	6.58101	5.22182	25.6096	0.00990428
B52	CG6650	0.224126	0.285986	0.267171	1.1321	1.12916	251.68	249.482	282.44	251.631	249.482	281.706	0.0617058
B52	CG6664	0.934146	0.111516	0.363471	1.09325	1.16393	455.334	452.52	494.72	457.466	452.52	526.704	0.209004
B52	CG6686	0.000477671	77.7947	87.6182	6.02766	6.21323	774.133	579.798	3494.82	781.306	579.798	3602.42	0.000259684
B52	CG6689	0.00768617	9.85572	10.5683	3.84285	3.92518	65.7095	55.2402	212.28	66.0128	55.2402	216.828	0.00352361
B52	CG6695	0.00136943	42.871	37.4247	4.98991	4.5036	181.656	143.489	715.995	177.004	143.489	646.216	0.000693363
B52	CG6696	0.145339	0.519162	0.571237	3.85788	4.39354	0.925264	0.77719	2.9983	0.953018	0.77719	3.41461	0.0437939
B52	CG6701	0.0495377	1.86862	2.44692	1.34566	1.40055	2546.62	2489.26	3349.7	2555.73	2489.26	3486.32	0.0183074
B52	CG6712	0.000254214	122.053	125.103	11.6844	11.2897	211.17	123.326	1440.98	207.925	123.326	1392.31	0.000149258
B52	CG6724	0.0304166	3.24348	2.87219	1.70408	1.63704	270.785	258.645	440.751	269.629	258.645	423.412	0.0120573
B52	CG6729	0.0535586	1.64344	1.78909	1.62647	1.68692	53.7721	51.6164	83.9525	53.9801	51.6164	87.0726	0.0195262
B52	CG6744	0.0221293	8.96991	5.29087	2.34316	1.97027	107.631	98.785	231.469	105.175	98.785	194.633	0.00913852
B52	CG6745	0.00183984	31.5636	31.0465	5.175	5.04402	98.6538	77.1737	399.374	97.9799	77.1737	389.266	0.00091701
B52	CG6752	0.0263896	3.62521	3.29929	2.02759	1.99479	60.3581	56.4883	114.535	60.2346	56.4883	112.682	0.01067
B52	CG6761	0.293009	0.202693	0.256594	1.33587	1.90169	1.37683	1.34667	1.79898	1.42763	1.34667	2.56096	0.0767044
B52	CG6766	0.0182404	4.6611	5.59289	1.94756	2.08127	118.175	111.153	216.477	119.166	111.153	231.34	0.00767759
B52	CG6769	0.0097899	13.3989	9.02374	2.96286	2.47288	180.355	159.485	472.533	175.145	159.485	394.388	0.00438859
B52	CG6770	0.0148424	5.77006	5.85577	2.11513	2.11629	224.48	208.947	441.95	224.497	208.947	442.192	0.00636578
B52	CG6785	0.961868	0.164208	0.626283	1.31803	2.06393	4.64613	4.54967	5.99661	4.87237	4.54967	9.39019	0.221555
B52	CG6790	0.156229	0.623385	0.475164	1.59562	1.54135	10.9407	10.5228	16.7905	10.9026	10.5228	16.2194	0.0464543
B52	CG6791	0.365519	0.256231	0.155684	1.11546	1.08349	576.397	571.994	638.039	575.178	571.994	619.752	0.091442
B52	CG6796	0.393104	0.171338	0.265596	1.24123	1.336	20.1264	19.8078	24.5861	20.2515	19.8078	26.4633	0.0970513
B52	CG6800	0.118863	0.675231	0.682755	2.3371	2.49525	3.35346	3.079	7.19593	3.38593	3.079	7.68288	0.0373708
B52	CG6808	0.00818974	9.2845	11.6345	2.52001	2.74868	133.395	121.122	305.227	135.242	121.122	332.925	0.00374009
B52	CG6813	0.958028	0.299285	1.2665	1.41295	2.07237	14.3909	14.0054	19.7888	15.0066	14.0054	29.0242	0.219437
B52	CG6830	0.982299	0.58932	0.125879	4.31747	2.45847	0.848049	0.694459	2.9983	0.761982	0.694459	1.70731	0.237161
B52	CG6833	0.539678	0.988051	0.369058	1.37169	1.16538	196.673	191.918	263.251	194.034	191.918	223.657	0.124946
B52	CG6843	0.000983709	47.6305	51.9818	5.31608	5.3986	316.228	245.568	1305.46	317.579	245.568	1325.72	0.000508672
B52	CG6845	0.000256294	120.304	139.662	16.0522	17.6777	101.488	50.6561	813.14	106.978	50.6561	895.482	0.000151512
B52	CG6907	0.00385669	21.7019	17.1614	3.45194	3.05436	168.764	145.054	500.717	164.92	145.054	443.046	0.00186211
B52	CG6923	0.0166633	7.30127	5.38681	2.08469	1.91266	134.484	125.415	261.452	133.046	125.415	239.877	0.00709902
B52	CG6937	0.462078	0.362245	0.176798	1.08413	1.04511	1552.43	1543.77	1673.65	1548.41	1543.77	1613.4	0.110559
B52	CG6950	0.0889324	1.01157	1.31118	1.34025	1.45744	65.8906	64.4292	86.3511	66.394	64.4292	93.9019	0.0297289
B52	CG6966	0.205283	0.323786	0.312017	1.07619	1.0889	317.541	315.936	340.008	317.809	315.936	344.022	0.0575044
B52	CG6999	0.000411689	87.4063	92.7803	19.3397	20.2396	42.9353	19.3172	373.589	44.0943	19.3172	390.973	0.000228713
B52	CG7011	0.938049	0.0982773	0.324037	1.06361	1.19798	51.5233	51.3057	54.5691	51.9829	51.3057	61.463	0.210581
B52	CG7028	0.00178139	30.2661	35.6571	4.08753	4.40874	178.848	148.319	606.257	182.024	148.319	653.898	0.000890551
B52	CG7044	0.960821	0.0225388	0.0797445	1.08498	1.10324	190.648	189.574	205.684	190.879	189.574	209.145	0.220901
B52	CG7054	0.00579693	14.7378	12.4558	2.59593	2.44336	186.316	168.4	437.153	184.604	168.4	411.461	0.00270049
B52	CG7058	0.966229	0.221116	0.91059	10.5119	29.9287	0.0932202	0.0570459	0.599661	0.167063	0.0570459	1.70731	0.224051
B52	CG7065	0.00495131	15.4778	14.0687	2.81876	2.70622	174.368	155.513	438.352	173.202	155.513	420.851	0.00233211
B52	CG7069	0.0255797	3.89276	5.8361	3.02067	3.64122	27.9325	24.6164	74.3579	28.9509	24.6164	89.6336	0.010348
B52	CG7071	0.749922	0.180271	0.0711866	1.59394	1.36144	1.95555	1.88107	2.9983	1.92639	1.88107	2.56096	0.16278
B52	CG7079	0.387194	0.670753	0.31334	18.6069	13.244	0.140114	0.0644558	1.19932	0.117069	0.0644558	0.853653	0.0958855
B52	CG7099	0.805815	0.292519	0.89411	1.16264	1.31765	161.102	159.374	185.295	162.749	159.374	209.999	0.174787
B52	CG7102	0.374605	0.178182	0.119172	1.67749	1.59201	2.24172	2.14484	3.59796	2.22949	2.14484	3.41461	0.0932595
B52	CG7110	0.00618519	11.9879	12.386	2.69023	2.71432	147.324	132.404	356.198	147.537	132.404	359.388	0.00287942
B52	CG7115	0.0184542	5.5656	8.94431	2.44896	3.02753	51.0182	46.5241	113.936	52.8126	46.5241	140.853	0.00777618
B52	CG7135	0.332699	0.760271	0.368624	3.6161	2.57387	1.55802	1.32664	4.79729	1.46584	1.32664	3.41461	0.0848955
B52	CG7137	0.00116492	45.3903	42.5532	5.79372	5.39433	162.256	122.96	712.397	158.982	122.96	663.289	0.000601896
B52	CG7139	0.0116845	6.84085	7.56945	1.94198	2.02261	205.44	193.301	375.388	206.479	193.301	390.973	0.00515932
B52	CG7148	0.599194	0.154051	0.318122	1.19095	1.30225	35.1848	34.7426	41.3766	35.4426	34.7426	45.2436	0.135569
B52	CG7154	0.0151533	6.14069	5.54361	2.07383	2.00751	147.182	137.349	284.839	146.575	137.349	275.73	0.00649467
B52	CG7158	0.0458571	2.8067	2.0468	1.65387	1.53526	190.328	182.378	301.629	188.886	182.378	279.998	0.0171712
B52	CG7172	0.000311059	104.562	115.186	11.0155	11.3865	179.666	107.733	1186.73	182.331	107.733	1226.7	0.000177697
B52	CG7182	0.0110816	9.31398	7.427	2.18207	2.04144	177.288	164.338	358.597	175.748	164.338	335.486	0.00490342
B52	CG7183	0.000491576	78.6195	79.1392	13.9305	13.575	64.2836	34.5233	480.928	63.4655	34.5233	468.656	0.000266645
B52	CG7185	0.00938335	10.4996	8.49262	2.22042	2.02772	599.557	554.447	1231.1	592.434	554.447	1124.26	0.00422163
B52	CG7206	0.00107864	45.9009	46.6625	6.42382	6.34229	110.326	81.0274	520.505	109.886	81.0274	513.899	0.000554135
B52	CG7218	0.372487	0.720259	0.336788	1.24734	1.15089	105.555	103.842	129.527	104.887	103.842	119.511	0.0927921
B52	CG7227	1	0.000577224	0.0513975	1.54038	2.19282	0.403319	0.389295	0.599661	0.420252	0.389295	0.853653	0.323225
B52	CG7239	0.0182387	6.9335	5.0257	1.9711	1.79765	219.943	206.57	407.17	217.554	206.57	371.339	0.00767581
B52	CG7255	0.555393	0.476928	1.29689	1.22305	1.41765	125.89	124.046	151.714	127.499	124.046	175.853	0.127842
B52	CG7261	0.0696186	1.24922	1.35493	1.34081	1.35031	362.717	354.659	475.531	362.942	354.659	478.9	0.0242608
B52	CG7264	0.999742	0.018337	0.13599	1.0911	1.55325	2.21172	2.19837	2.39864	2.27945	2.19837	3.41461	0.283296
B52	CG7265	0.00636979	13.7947	11.513	3.54934	3.2667	65.4267	55.9224	198.488	64.373	55.9224	182.682	0.00295763
B52	CG7275	0.00899838	9.15999	8.79071	2.39678	2.36261	148.506	135.856	325.616	148.197	135.856	320.974	0.00407905
B52	CG7280	0.00597341	14.1984	12.1644	2.96694	2.77991	125.739	111.163	329.813	124.353	111.163	309.023	0.00278574
B52	CG7288	0.999446	0.451828	0.0641175	1.22566	1.069	70.5196	69.4744	85.1518	69.794	69.4744	74.2678	0.277422
B52	CG7289	0.864184	0.0849036	0.0294846	1.02913	1.0106	126.104	125.86	129.527	125.949	125.86	127.194	0.187364
B52	CG7324	0.011291	7.34744	10.2362	1.97516	2.16795	442.004	415.023	819.736	447.338	415.023	899.751	0.00498821
B52	CG7332	0.0680423	1.33675	1.26958	1.41244	1.40104	149.627	145.623	205.684	149.516	145.623	204.023	0.0237777
B52	CG7337	0.0974942	1.16596	1.86168	1.39993	1.50834	336.425	327.688	458.74	338.794	327.688	494.265	0.0320046
B52	CG7338	0.00329588	20.1293	19.7373	3.00133	2.93781	288.505	254.543	763.968	287.427	254.543	747.8	0.00160653
B52	CG7339	0.165976	0.432964	0.468312	1.12569	1.14404	413.081	409.649	461.139	413.582	409.649	468.656	0.048731
B52	CG7352	0.316278	3.25393	1.14615	2.60805	1.81417	22.4026	20.2335	52.7701	21.3318	20.2335	36.7071	0.0814403
B52	CG7357	0.0190325	6.27897	4.71757	2.03512	1.86016	200.649	187.696	381.984	198.459	187.696	349.144	0.00797597
B52	CG7358	0.000954389	48.9844	51.9544	5.56132	5.67639	162.974	124.971	695.007	163.932	124.971	709.386	0.000493506
B52	CG7366	0.809093	0.11649	0.29619	1.69692	2.41566	1.4792	1.41353	2.39864	1.54694	1.41353	3.41461	0.175479
B52	CG7369	0.15315	0.509098	0.467084	1.21996	1.20998	182.543	179.905	219.476	182.423	179.905	217.682	0.0456445
B52	CG7371	0.169394	0.88331	1.69253	1.39387	1.57437	94.0412	91.635	127.728	95.1439	91.635	144.267	0.0494367
B52	CG7372	0.0759156	1.1975	1.5382	1.50824	1.56765	300.075	290.241	437.752	301.225	290.241	454.997	0.026091
B52	CG7381	0.0447391	2.3109	3.43322	1.72789	1.96084	77.1445	73.5743	127.128	78.2872	73.5743	144.267	0.0168295
B52	CG7382	0.491956	0.47261	0.212564	1.65019	1.33057	97.0601	93.0277	153.513	95.0779	93.0277	123.78	0.11587
B52	CG7386	0.0578745	1.59039	2.06727	2.16776	2.44747	17.2934	16.0444	34.7803	17.5926	16.0444	39.2681	0.0208756
B52	CG7394	0.343122	0.208282	0.316141	1.1138	1.15593	168.167	166.901	185.895	168.636	166.901	192.926	0.0868834
B52	CG7414	0.784172	0.399443	0.137254	1.13212	1.05803	612.894	607.543	687.811	609.893	607.543	642.801	0.169663
B52	CG7420	0.0393373	2.50771	2.22785	2.08242	2.04156	32.7268	30.5241	63.564	32.6436	30.5241	62.3167	0.0150936
B52	CG7429	0.00759963	10.3353	10.2062	10.7159	10.6428	7.92977	4.81255	51.5708	7.90633	4.81255	51.2192	0.00348299
B52	CG7442	0.378026	2.19038	0.790508	3.60504	2.2313	4.49024	3.82581	13.7922	4.13986	3.82581	8.53653	0.0939547
B52	CG7453	0.0401336	2.28044	2.88572	1.50144	1.54436	571.233	552.755	829.93	572.815	552.755	853.653	0.0153439
B52	CG7456	0.00813645	9.71622	9.65575	2.3708	2.36537	161.49	147.967	350.801	161.436	147.967	349.998	0.00371715
B52	CG7457	0.00698017	11.172	10.9009	2.34299	2.34328	196.87	180.692	423.36	196.874	180.692	423.412	0.00321839
B52	CG7458	0.927088	0.583259	0.154361	1.57076	1.0164	13.0776	12.5982	19.7888	12.612	12.5982	12.8048	0.206363
B52	CG7461	0.0137304	8.81111	6.46644	2.02259	1.8273	517.477	484.451	979.846	511.17	484.451	885.239	0.00593219
B52	CG7488	0.0127434	6.52639	6.69223	2.13044	2.21229	88.3841	82.1901	175.101	88.8326	82.1901	181.828	0.00556219
B52	CG7504	0.13443	0.654705	0.878209	1.26996	1.39483	128.343	126.074	160.109	129.393	126.074	175.853	0.0412339
B52	CG7509	0.91197	0.102352	0.314254	1.42487	1.85936	5.19327	5.05023	7.19593	5.33956	5.05023	9.39019	0.201379
B52	CG7518	0.00188809	30.8525	30.4902	3.2229	3.12659	981.228	854.584	2754.24	975.741	854.584	2671.94	0.000941462
B52	CG7556	0.0156578	5.92939	5.37515	1.82614	1.75969	564.04	534.597	976.248	561.672	534.597	940.726	0.0066974
B52	CG7564	0.0085347	12.2664	9.32358	2.29783	2.07442	386.759	355.96	817.937	381.457	355.96	738.41	0.00388386
B52	CG7565	0.0638465	1.5117	1.34554	1.37179	1.34166	417.957	407.848	559.483	417.138	407.848	547.192	0.0226162
B52	CG7568	0.0388413	2.45825	2.26321	5.1623	4.97825	4.60024	3.60101	18.5895	4.55606	3.60101	17.9267	0.0149603
B52	CG7593	0.17952	0.611793	0.426085	1.26378	1.21421	136.645	134.283	169.704	136.201	134.283	163.048	0.0517799
B52	CG7598	0.014072	6.65051	5.91343	2.00996	1.95832	161.445	151.261	304.028	160.925	151.261	296.218	0.0060703
B52	CG7600	0.0433932	2.05504	2.17963	1.38977	1.41668	355.483	346.479	481.528	356.104	346.479	490.851	0.0163932
B52	CG7609	0.0875345	1.10027	0.935812	1.3189	1.30541	108.19	105.938	139.721	108.095	105.938	138.292	0.0293631
B52	CG7616	0.119634	0.960178	0.700914	1.81071	1.68719	19.1991	18.2146	32.9813	19.0491	18.2146	30.7315	0.0375809
B52	CG7627	0.0561584	2.59988	1.77139	1.44332	1.34587	858.073	833.441	1202.92	852.658	833.441	1121.7	0.0203205
B52	CG7656	0.0187875	5.9279	4.65113	1.84208	1.73924	201.128	190.438	350.801	199.823	190.438	331.218	0.00789309
B52	CG7686	0.000379434	95.2126	92.8325	7.74501	7.25012	354.008	244.2	1891.33	345.951	244.2	1770.48	0.000211712
B52	CG7692	0.151532	0.718644	1.15007	1.28868	1.37976	168.371	165.192	212.88	169.374	165.192	227.925	0.0452457
B52	CG7705	0.0522586	1.68469	1.91465	1.54573	1.62204	70.3606	67.8906	104.941	70.706	67.8906	110.121	0.0191123
B52	CG7706	0.00611269	13.5082	11.9159	4.14129	3.9231	48.1593	39.8202	164.907	47.5801	39.8202	156.219	0.00284105
B52	CG7712	0.00863628	9.12975	9.29419	2.61718	2.65387	202.046	182.383	477.33	202.492	182.383	484.021	0.00392783
B52	CG7728	0.000911106	50.2031	54.1977	4.78672	4.85648	381.741	304.796	1458.97	383.159	304.796	1480.23	0.000470138
B52	CG7741	0.0943023	1.93978	1.17671	1.74897	1.56698	51.4778	49.0297	85.7515	50.883	49.0297	76.8288	0.0311909
B52	CG7742	0.799869	0.105092	0.261761	1.44996	2.06411	1.7039	1.65428	2.39864	1.77163	1.65428	3.41461	0.173361
B52	CG7747	0.0107586	7.59871	10.4401	3.15319	3.73646	38.928	34.0414	107.339	40.2516	34.0414	127.194	0.00478488
B52	CG7766	0.0349415	2.53825	2.98315	1.4285	1.49016	370.032	359.755	513.909	371.511	359.755	536.094	0.0136448
B52	CG7770	0.0704428	1.23651	1.30339	1.32323	1.32942	418.503	409.675	542.093	418.672	409.675	544.631	0.0245236
B52	CG7791	0.60182	0.352984	0.15032	1.09878	1.05161	422.445	419.681	461.139	421.125	419.681	441.339	0.136058
B52	CG7806	0.0303035	3.1508	4.39872	1.84179	2.00079	177.087	167.677	308.825	178.864	167.677	335.486	0.0120157
B52	CG7824	0.017684	4.7867	5.57125	2.31058	2.53547	40.6373	37.372	86.3511	41.1976	37.372	94.7555	0.00747675
B52	CG7834	0.033961	8.26702	4.35171	2.19749	1.78758	266.086	246.414	541.494	259.352	246.414	440.485	0.0132911
B52	CG7837	0.0289742	6.06222	3.77113	2.06352	1.79639	124.171	115.95	239.265	122.106	115.95	208.291	0.0115316
B52	CG7839	0.000561477	68.9693	85.9026	7.16238	8.18058	193.007	136.804	979.846	202.293	136.804	1119.14	0.000304593
B52	CG7852	0.0515286	3.10927	2.02387	1.54254	1.41454	393.948	380.197	586.468	390.704	380.197	537.802	0.0188976
B52	CG7857	0.0108796	9.75411	7.61075	2.73164	2.49153	81.7854	73.3211	200.287	80.6118	73.3211	182.682	0.00484033
B52	CG7878	0.0214972	4.04161	4.9468	1.52222	1.6067	810.413	783.148	1192.13	814.824	783.148	1258.29	0.00891599
B52	CG7900	0.302596	0.192304	0.242488	1.57938	1.74871	3.54911	3.41713	5.39695	3.58769	3.41713	5.97557	0.0787007
B52	CG7911	0.00164356	33.0124	34.7001	3.49798	3.5256	491.749	421.548	1474.57	492.526	421.548	1486.21	0.000821531
B52	CG7912	0.00935808	9.64043	15.2976	8.0534	11.974	9.85265	6.70145	53.9695	11.6042	6.70145	80.2434	0.00421132
B52	CG7914	0.997595	0.231937	1.42731	1.23203	1.81332	29.1611	28.7169	35.38	30.274	28.7169	52.0729	0.264086
B52	CG7920	0.0422686	2.15887	2.13604	1.47228	1.4721	247.034	239.494	352.6	247.031	239.494	352.559	0.016036
B52	CG7922	0.0842822	2.07185	4.20698	1.71128	2.14641	67.9012	64.8272	110.937	69.7817	64.8272	139.145	0.0284669
B52	CG7927	0.00198505	28.032	32.3989	3.70874	3.91487	258.46	218.926	811.941	261.469	218.926	857.068	0.000989819
B52	CG7928	0.000779255	56.6246	59.0121	6.11035	6.20565	173.545	129.445	790.952	174.368	129.445	803.288	0.000407685
B52	CG7946	0.00531535	16.7355	13.3877	2.88171	2.58657	244.033	216.832	624.846	239.766	216.832	560.85	0.00248463
B52	CG7950	0.161201	0.576351	0.449377	2.25865	2.14355	3.45327	3.18594	7.19593	3.42883	3.18594	6.82923	0.0476004
B52	CG7956	0.058083	1.56501	1.9952	1.41922	1.46539	343.126	333.797	473.732	344.153	333.797	489.143	0.0209487
B52	CG7967	0.0687369	1.44002	1.2385	1.34067	1.30783	459.274	449.075	602.059	458.29	449.075	587.314	0.0240366
B52	CG7971	0.00028712	111.986	122.341	7.58869	7.60317	1303.57	905.73	6873.31	1304.44	905.73	6886.42	0.000165702
B52	CG7974	0.406906	0.674959	1.73777	1.3083	1.58354	184.303	180.591	236.266	187.617	180.591	285.974	0.0998295
B52	CG7987	0.079894	1.07474	1.13912	1.38529	1.38646	203.35	198.258	274.645	203.366	198.258	274.876	0.0272848
B52	CG7988	0.0155442	8.62893	6.01751	5.80719	4.68987	14.1809	10.7392	62.3647	13.381	10.7392	50.3655	0.00665417
B52	CG7997	0.0194312	4.66688	4.47607	2.1533	2.16661	57.2802	53.1905	114.535	57.3274	53.1905	115.243	0.00811587
B52	CG8001	0.0765453	1.15296	1.40955	1.41007	1.45416	153.788	149.696	211.081	154.228	149.696	217.682	0.0262832
B52	CG8003	0.00422581	18.0627	15.9131	3.41183	3.25262	90.1765	77.6856	265.05	89.352	77.6856	252.681	0.00201732
B52	CG8004	0.155621	0.75468	0.523739	1.32762	1.26531	108.925	106.596	141.52	108.482	106.596	134.877	0.0462792
B52	CG8005	0.019075	4.49814	4.8528	2.84286	2.98379	27.9484	24.8904	70.76	28.1823	24.8904	74.2678	0.00798863
B52	CG8008	0.0715395	1.21214	1.32557	1.31488	1.35156	162.506	159.164	209.282	162.895	159.164	215.121	0.0248353
B52	CG8010	0.00441333	15.1637	17.4846	3.50769	3.80053	71.8331	61.5442	215.878	73.0347	61.5442	233.901	0.0021027
B52	CG8034	1	0.00793009	0.243389	1.0191	1.1068	444.823	444.257	452.744	447.42	444.257	491.704	0.322321
B52	CG8042	0.000874035	51.7934	55.4788	5.19483	5.24626	294.841	230.406	1196.92	295.631	230.406	1208.77	0.000454997
B52	CG8046	0.0744605	1.4594	1.15761	1.29422	1.2637	294.793	289.122	374.188	294.204	289.122	365.364	0.0256791
B52	CG8051	0.977587	0.144815	0.587918	1.42912	2.23788	4.31605	4.19601	5.99661	4.54229	4.19601	9.39019	0.232782
B52	CG8060	0.0530967	2.74006	1.86885	1.77125	1.61447	98.9569	94.1177	166.706	97.9732	94.1177	151.95	0.0193917
B52	CG8067	0.114564	0.782142	0.677875	1.32214	1.33825	121.847	119.285	157.711	121.975	119.285	159.633	0.0362596
B52	CG8078	0.00664886	11.0842	14.1987	4.24741	4.92886	36.2388	29.7895	126.528	37.5921	29.7895	146.828	0.00305806
B52	CG8079	0.00300939	20.9132	21.807	4.54527	4.69942	60.1886	48.6824	221.275	60.6889	48.6824	228.779	0.00147638
B52	CG8097	0.0562231	1.56145	1.78802	1.44745	1.5156	103.249	100.258	145.118	103.704	100.258	151.95	0.0203413
B52	CG8105	0.0255884	3.9571	3.3941	12.3695	11.4456	1.70449	0.969582	11.9932	1.64478	0.969582	11.0975	0.0103532
B52	CG8108	8.64255e-05	Inf	Inf	20.9904	21.8489	1081.65	463.692	9733.09	1108.19	463.692	10131.2	8.64255e-05
B52	CG8128	0.331244	0.137971	0.127373	1.18856	1.17461	61.815	61.0476	72.5589	61.7582	61.0476	71.7069	0.0846278
B52	CG8129	0.253366	0.237865	0.213273	1.79787	1.79157	3.5128	3.33539	5.99661	3.5114	3.33539	5.97557	0.0683151
B52	CG8142	0.0738245	1.272	1.14434	1.38401	1.39229	66.6557	64.9919	89.9491	66.6916	64.9919	90.4873	0.0255133
B52	CG8147	0.0858553	2.4676	1.43327	2.02953	1.74169	44.5203	41.6609	84.5522	43.7209	41.6609	72.5605	0.0289026
B52	CG8149	0.00684293	12.2309	10.8555	2.54077	2.43625	163.442	148.218	376.587	162.41	148.218	361.095	0.00315348
B52	CG8155	0.477522	0.0626566	0.0833193	1.13266	1.12528	176.79	175.24	198.488	176.704	175.24	197.194	0.113271
B52	CG8157	0.954982	0.0851425	0.291593	1.34281	1.67262	7.30846	7.14516	9.59457	7.46556	7.14516	11.9511	0.218011
B52	CG8159	0.110168	2.44289	1.287	1.93679	1.64212	44.7376	42.1078	81.5538	43.9104	42.1078	69.1459	0.0352345
B52	CG8173	0.108217	1.32123	0.871207	1.344	1.2688	216.794	211.934	284.839	215.731	211.934	268.901	0.0347289
B52	CG8176	0.0404622	2.33515	3.14161	1.4453	1.55139	291.792	283.379	409.568	293.796	283.379	439.631	0.0154732
B52	CG8177	0.0156989	7.86219	5.73999	2.39075	2.13904	117.307	107.353	256.655	115.505	107.353	229.633	0.00671073
B52	CG8184	0.0235732	4.10697	3.66299	1.69608	1.6287	3749.22	3582.95	6076.96	3733.13	3582.95	5835.57	0.00966348
B52	CG8187	0.239094	0.784946	1.68753	1.51414	1.86632	33.5885	32.4754	49.1722	34.351	32.4754	60.6094	0.0648693
B52	CG8188	0.0135219	6.24232	8.55268	1.99429	2.17119	531.589	498.543	994.237	537.469	498.543	1082.43	0.00586183
B52	CG8192	0.930681	1.92648	0.42667	4.5606	2.23872	4.71827	3.81313	17.3902	4.12803	3.81313	8.53653	0.207598
B52	CG8202	0.685528	2.28206	0.645052	1.66664	1.31081	68.0185	65.1242	108.539	66.4736	65.1242	85.3653	0.150856
B52	CG8206	0.00706478	14.7157	10.9744	2.89568	2.5922	98.6686	87.5981	253.656	96.8963	87.5981	227.072	0.00324936
B52	CG8209	0.00251443	23.8669	25.1565	3.39501	3.42002	233.304	201.182	683.013	233.639	201.182	688.045	0.0012471
B52	CG8219	0.0424892	2.65659	2.10297	3.83752	3.64196	4.45974	3.75031	14.3919	4.41085	3.75031	13.6585	0.0161127
B52	CG8223	0.0137253	5.97138	6.66038	2.78844	2.95688	47.1758	42.1502	117.533	47.6491	42.1502	124.633	0.0059306
B52	CG8229	0.0971349	2.42948	1.34573	1.58491	1.41211	112.429	108.21	171.503	111.183	108.21	152.804	0.0318946
B52	CG8235	0.00182431	31.944	31.0788	7.49415	7.04093	125.782	87.7789	657.828	123.13	87.7789	618.045	0.000910521
B52	CG8252	0.0590843	3.8485	2.16687	15.0469	8.98267	2.39237	1.23543	18.5895	1.8929	1.23543	11.0975	0.0212674
B52	CG8258	0.0113953	7.2013	7.39349	1.86975	1.86936	599.568	566.708	1059.6	599.553	566.708	1059.38	0.00503305
B52	CG8260	0.0464217	3.20788	2.15807	4.71248	3.93257	4.60356	3.69023	17.3902	4.41169	3.69023	14.5121	0.0173479
B52	CG8273	0.00442777	16.4258	15.4757	2.80697	2.70841	265.219	236.705	664.424	263.664	236.705	641.094	0.00210833
B52	CG8281	0.997882	0.39866	0.0659295	1.14494	1.01534	129.03	127.795	146.317	127.926	127.795	129.755	0.265331
B52	CG8289	0.0281698	3.47928	3.095	1.50026	1.46663	954.524	923.718	1385.82	952.453	923.718	1354.75	0.0112837
B52	CG8290	0.0175905	5.06023	6.95772	1.77641	1.9436	334.449	317.99	564.88	337.994	317.99	618.045	0.00743921
B52	CG8301	0.00784425	10.6531	9.70525	2.70542	2.62001	102.691	92.2072	249.459	102.166	92.2072	241.584	0.00358858
B52	CG8306	0.0772211	1.49384	2.42168	1.30032	1.44085	261.07	255.945	332.812	263.468	255.945	368.778	0.0264861
B52	CG8316	0.0211635	4.48322	4.06639	2.3065	2.28709	40.9816	37.6981	86.9508	40.9328	37.6981	86.219	0.00880737
B52	CG8317	0.117585	1.48458	0.900245	2.03495	1.73813	14.1756	13.2606	26.9847	13.9132	13.2606	23.0486	0.0370084
B52	CG8319	0.0448559	1.98425	2.10876	1.64748	1.72469	123.402	118.295	194.89	124.011	118.295	204.023	0.0168684
B52	CG8326	0.035093	2.54933	2.65358	1.66707	1.72109	83.4067	79.8555	133.125	83.6943	79.8555	137.438	0.0137028
B52	CG8334	0.0228853	4.11377	3.79118	1.62275	1.58141	680.846	653.706	1060.8	679.044	653.706	1033.77	0.00941231
B52	CG8336	0.0137762	6.07469	6.31418	2.54342	2.61405	57.9865	52.5767	133.724	58.2341	52.5767	137.438	0.00594968
B52	CG8366	0.0875434	6.06047	2.63814	3.05828	2.21031	28.9878	25.4901	77.9559	27.5468	25.4901	56.3411	0.0293652
B52	CG8368	0.00513975	13.6687	14.775	2.71912	2.8462	133.721	119.971	326.215	134.737	119.971	341.461	0.00241096
B52	CG8370	0.0366561	2.51106	2.44953	1.46737	1.46907	295.399	286.474	420.362	295.432	286.474	420.851	0.0142061
B52	CG8378	0.87619	0.378322	0.115441	1.15223	1.07096	216.595	214.418	247.06	215.433	214.418	229.633	0.19041
B52	CG8379	0.217233	0.669941	1.28235	1.23415	1.35386	221.57	218.165	269.248	223.311	218.165	295.364	0.0601643
B52	CG8386	0.0042876	20.0819	15.9165	6.1493	5.31365	33.6652	25.0618	154.113	32.2691	25.0618	133.17	0.0020408
B52	CG8398	0.864053	0.201177	0.62253	1.70389	2.72878	2.94761	2.8155	4.79729	3.13999	2.8155	7.68288	0.187301
B52	CG8405	0.014627	5.66627	6.66007	1.77638	1.83139	750.57	713.633	1267.68	753.187	713.633	1306.94	0.00629819
B52	CG8412	0.209076	0.323998	0.295397	1.15054	1.15093	116.868	115.706	133.125	116.871	115.706	133.17	0.0583202
B52	CG8414	0.0459226	1.95294	2.37176	1.55268	1.61205	159.775	154.098	239.265	160.385	154.098	248.413	0.017198
B52	CG8417	0.0546616	5.70644	2.88484	2.17887	1.77863	84.8979	78.7119	171.503	82.7977	78.7119	139.999	0.0198897
B52	CG8435	0.00583453	12.6761	12.8593	3.7466	3.87435	40.1446	33.9315	127.128	40.4336	33.9315	131.463	0.00271437
B52	CG8441	0.000842653	52.7187	67.3203	7.24796	8.54452	105.008	74.1307	537.296	111.416	74.1307	633.411	0.000438945
B52	CG8461	1	0.000392428	0.528982	1.05048	1.30294	115.699	115.31	121.131	117.639	115.31	150.243	0.33652
B52	CG8478	0.246654	0.402655	0.653529	1.1452	1.21048	299.772	296.898	340.008	301.064	296.898	359.388	0.0667398
B52	CG8494	0.00967996	9.40103	8.1674	2.26562	2.16805	172.493	159.072	360.396	171.459	159.072	344.876	0.00434477
B52	CG8500	0.0262228	5.63748	3.77035	1.91392	1.7137	188.141	177.336	339.408	185.774	177.336	303.901	0.010602
B52	CG8503	0.0513532	1.76234	2.19971	7.61024	9.75028	1.13521	0.787965	5.99661	1.24763	0.787965	7.68288	0.0188355
B52	CG8507	0.000599668	65.8199	77.995	6.21554	6.68062	316.867	235.116	1461.37	324.156	235.116	1570.72	0.000321474
B52	CG8525	0.0436169	2.55574	4.06426	1.83419	2.26001	41.0689	38.9053	71.3596	42.1734	38.9053	87.9263	0.0164629
B52	CG8531	0.0576229	2.04291	3.33563	1.47598	1.62861	296.354	287.239	423.96	299.277	287.239	467.802	0.0207929
B52	CG8545	0.000147	167.227	192.242	10.5767	10.9828	2314.46	1412.6	14940.5	2352.71	1412.6	15514.3	0.000100929
B52	CG8549	0.00167083	33.7756	33.3034	4.76441	4.67961	123.912	99.0538	471.933	123.353	99.0538	463.534	0.000835466
B52	CG8550	0.0216416	5.90747	4.27202	7.87049	6.31505	6.10989	4.19051	32.9813	5.67536	4.19051	26.4633	0.00897206
B52	CG8564	0.738073	0.449862	0.160857	1.24701	1.10531	25.9063	25.4866	31.782	25.6655	25.4866	28.1706	0.160533
B52	CG8569	0.165386	1.66009	0.846711	1.60474	1.41243	72.3068	69.5046	111.537	71.4157	69.5046	98.1701	0.0485986
B52	CG8611	0.000466979	80.4022	83.2845	6.90208	6.88834	249.881	179.323	1237.7	249.717	179.323	1235.24	0.000255503
B52	CG8613	0.0762763	1.55226	2.56075	1.4882	1.69671	94.0291	91.0653	135.523	95.295	91.0653	154.511	0.0262015
B52	CG8635	0.000247762	128.022	123.353	9.82204	8.99548	352.061	221.682	2177.37	339.845	221.682	1994.13	0.000146531
B52	CG8636	0.000137473	177.09	170.62	12.5919	11.2237	594.354	335.264	4221.61	563.774	335.264	3762.9	9.75471e-05
B52	CG8642	1	0.135562	0.00724392	2.12704	1.51398	0.606211	0.563846	1.19932	0.583166	0.563846	0.853653	0.31053
B52	CG8646	0.552285	0.535534	0.221598	1.67093	1.39617	17.2468	16.5084	27.5844	16.9444	16.5084	23.0486	0.127111
B52	CG8675	0.000444702	80.9577	92.8325	11.2808	12.2396	97.5648	57.8887	653.03	101.265	57.8887	708.532	0.000243093
B52	CG8677	0.0151558	5.54894	6.96889	2.56863	2.75167	587.685	532.046	1366.63	594.177	532.046	1464.02	0.00649549
B52	CG8679	0.0142537	6.49656	5.84514	3.63633	3.46317	27.5326	23.417	85.1518	27.2623	23.417	81.0971	0.00614576
B52	CG8728	0.0649304	3.64403	2.02955	1.65242	1.4566	212.819	203.948	337.009	210.157	203.948	297.071	0.022912
B52	CG8735	0.0697338	1.97213	3.54643	1.58232	1.91733	66.1396	63.6679	100.743	67.5616	63.6679	122.072	0.0243011
B52	CG8736	0.999238	0.0628543	0.387213	1.70622	3.64336	0.736005	0.702911	1.19932	0.826781	0.702911	2.56096	0.274919
B52	CG8765	0.0915833	1.83869	1.15341	1.42818	1.32218	264.301	256.965	366.992	262.485	256.965	339.754	0.0304144
B52	CG8777	0.442827	0.685487	1.84522	1.35046	1.66802	61.8007	60.3898	81.5538	63.0792	60.3898	100.731	0.107097
B52	CG8783	0.185193	0.387919	0.460651	1.2199	1.27587	48.8797	48.1735	58.7667	49.0595	48.1735	61.463	0.0531149
B52	CG8801	0.00358919	21.0708	17.9845	2.62457	2.43481	726.249	655.279	1719.83	717.959	655.279	1595.48	0.00174334
B52	CG8813	0.031778	3.53381	2.80255	5.45437	4.9176	4.27768	3.29824	17.9898	4.15965	3.29824	16.2194	0.0125468
B52	CG8814	0.499237	0.228904	0.465103	1.23808	1.33706	85.6138	84.2761	104.341	86.1698	84.2761	112.682	0.117334
B52	CG8833	0.00510269	15.3694	13.7028	3.92185	3.72794	57.1809	47.8585	187.694	56.5622	47.8585	178.414	0.00239628
B52	CG8841	0.0669201	1.48254	2.12168	1.43742	1.54211	177.748	172.712	248.26	178.953	172.712	266.34	0.0234632
B52	CG8858	0.0188766	4.512	5.3059	1.79141	1.84335	353.461	335.746	601.46	354.623	335.746	618.899	0.00791824
B52	CG8860	0.0224903	5.82534	4.15688	2.63152	2.30761	63.1655	56.9691	149.915	61.9353	56.9691	131.463	0.00927594
B52	CG8866	0.541033	0.569888	1.60939	1.20441	1.48762	68.6356	67.7129	81.5538	69.9141	67.7129	100.731	0.125196
B52	CG8878	0.01012	7.71284	8.77833	1.93503	1.9807	949.126	893.433	1728.82	951.846	893.433	1769.62	0.0045204
B52	CG8907	0.979264	1.88984	0.356371	5.09907	2.29226	2.84504	2.23444	11.3936	2.42694	2.23444	5.12192	0.234283
B52	CG8908	0.00781536	9.60527	11.1361	2.63378	2.87764	90.1352	81.2821	214.079	91.4567	81.2821	233.901	0.00356972
B52	CG8909	0.48397	0.255252	0.522153	2.16332	3.07962	1.79216	1.66317	3.59796	1.89375	1.66317	5.12192	0.114416
B52	CG8920	0.00448172	15.1336	16.4994	2.83287	2.96068	153.692	136.957	387.98	154.859	136.957	405.485	0.00213089
B52	CG8925	0.999938	0.0824331	0.680395	2.26411	6.44619	0.574351	0.529711	1.19932	0.722037	0.529711	3.41461	0.291678
B52	CG8929	0.00210982	28.3188	28.0275	3.57442	3.49296	258.276	220.442	787.954	257.079	220.442	769.995	0.00105589
B52	CG8939	0.00146518	35.0198	41.4409	3.53436	3.73467	1181.27	1010.53	3571.58	1194.76	1010.53	3774	0.000743652
B52	CG8949	0.00236346	24.5662	27.3731	3.97935	4.04513	490.214	408.981	1627.48	492.007	408.981	1654.38	0.00117402
B52	CG8993	0.0468002	2.58434	1.95885	1.53952	1.47006	131.144	126.591	194.89	130.558	126.591	186.096	0.0174803
B52	CG9003	0.361069	0.116753	0.130793	1.04231	1.05577	270.01	269.25	280.641	270.251	269.25	284.267	0.0904712
B52	CG9005	0.0404315	2.30229	2.20472	1.49181	1.4689	403.938	391.115	583.47	403.341	391.115	574.509	0.0154601
B52	CG9018	0.00154628	35.9821	35.0629	4.57627	4.4724	155.301	125.402	573.875	154.432	125.402	560.85	0.000778205
B52	CG9044	0.0299601	3.02269	3.03573	1.73534	1.73246	139.562	133.04	230.869	139.536	133.04	230.486	0.0118719
B52	CG9062	0.48001	0.348089	0.784579	1.14524	1.24767	319.852	316.785	362.795	322.015	316.785	395.242	0.113724
B52	CG9065	0.410845	0.449107	0.222823	1.16988	1.10103	342.654	338.817	396.376	341.099	338.817	373.047	0.100709
B52	CG9086	0.966601	0.0939305	0.34345	1.08441	1.14979	1261.78	1254.72	1360.63	1267.25	1254.72	1442.67	0.224364
B52	CG9104	0.0713231	1.43001	2.10533	1.70809	1.96712	32.7202	31.2453	53.3698	33.2598	31.2453	61.463	0.0247739
B52	CG9114	0.0232088	5.97057	4.14023	2.2805	2.0249	84.1925	77.5705	176.9	82.8707	77.5705	157.072	0.0095281
B52	CG9121	0.787346	1.53178	0.427803	2.87809	1.87785	5.62658	5.00049	14.3919	5.29314	5.00049	9.39019	0.170378
B52	CG9123	0.0106854	7.48988	7.9738	3.91572	4.14542	57.7995	48.3929	189.493	58.5406	48.3929	200.609	0.0047511
B52	CG9125	0.997343	1.76464	0.261303	1.53531	1.11745	53.8009	51.9471	79.7549	52.3538	51.9471	58.0484	0.263057
B52	CG9140	0.0444849	2.40026	1.98351	1.53618	1.48039	196.496	189.715	291.435	195.79	189.715	280.852	0.0167505
B52	CG9143	0.00050402	77.5453	77.9815	6.55887	6.37393	305.63	222.992	1462.57	302.881	222.992	1421.33	0.000276252
B52	CG9147	0.99988	0.101022	0.783648	1.091	1.4252	47.0032	46.7198	50.9712	48.0442	46.7198	66.585	0.288218
B52	CG9149	0.0437716	6.19503	3.28889	1.88682	1.59686	220.813	208.487	393.377	216.783	208.487	332.925	0.0165177
B52	CG9150	0.52552	0.471431	0.205539	2.17906	1.72335	2.67141	2.47673	5.39695	2.59617	2.47673	4.26827	0.122373
B52	CG9153	0.0827286	1.57337	2.75994	1.34674	1.48182	635.963	621.594	837.126	641.561	621.594	921.092	0.0280429
B52	CG9154	0.0124499	6.62964	6.86169	4.13989	4.34249	16.6412	13.7607	56.9678	16.827	13.7607	59.7557	0.00545691
B52	CG9170	0.00154167	34.214	37.1689	4.95467	5.08543	146.362	115.825	573.875	147.372	115.825	589.021	0.000775756
B52	CG9203	0.0232855	3.73539	4.41931	1.93115	2.05405	87.3959	82.2877	158.91	88.0701	82.2877	169.023	0.00955374
B52	CG9205	0.0478722	3.90124	2.37022	1.88205	1.63142	264.825	250.118	470.734	260.646	250.118	408.046	0.0178204
B52	CG9213	0.00342021	24.7542	19.0406	4.55529	3.9646	68.7193	55.5523	253.057	66.5316	55.5523	220.243	0.00166447
B52	CG9220	0.490971	0.143233	0.248338	1.08293	1.15029	72.3838	71.9858	77.9559	72.7071	71.9858	82.8044	0.115718
B52	CG9240	0.0854657	0.993385	1.11913	1.49596	1.55552	47.6224	46.0982	68.961	47.8055	46.0982	71.7069	0.0287999
B52	CG9246	0.00162781	32.2866	38.018	3.49918	3.72026	649.955	557.13	1949.5	658.166	557.13	2072.67	0.000815078
B52	CG9248	0.000989025	47.4819	51.4249	4.92664	5.06175	259.398	205.582	1012.83	261.25	205.582	1040.6	0.000511504
B52	CG9270	0.0243704	5.56049	3.89563	4.26577	3.68337	10.442	8.57508	36.5793	10.1091	8.57508	31.5852	0.00995258
B52	CG9272	0.583918	1.27167	0.434425	1.47525	1.24982	85.9686	83.3284	122.93	84.7163	83.3284	104.146	0.132863
B52	CG9279	0.0680648	1.28114	1.41565	2.97532	3.14251	7.07066	6.24789	18.5895	7.1403	6.24789	19.634	0.0237921
B52	CG9286	0.00717514	10.3104	12.3722	3.69703	4.22161	35.7852	30.3315	112.137	36.846	30.3315	128.048	0.00329376
B52	CG9300	0.490481	0.145621	0.0833193	1.01619	1.0084	161.864	161.689	164.307	161.78	161.689	163.048	0.115607
B52	CG9305	0.0165256	5.31176	5.25504	1.89488	1.88314	231.052	218.044	413.166	230.881	218.044	410.607	0.00704379
B52	CG9317	0.975967	0.161921	0.667701	1.38233	2.16461	4.44861	4.33804	5.99661	4.67485	4.33804	9.39019	0.231083
B52	CG9319	0.88886	0.862707	0.23234	1.50443	1.2105	28.428	27.5031	41.3766	27.889	27.5031	33.2925	0.194157
B52	CG9323	0.0421702	2.27831	2.08802	1.62818	1.61487	93.629	89.8655	146.317	93.5492	89.8655	145.121	0.0160105
B52	CG9330	0.0122605	7.33936	6.68699	2.00639	1.94368	276.51	259.125	519.906	275.427	259.125	503.655	0.00538655
B52	CG9331	0.616093	0.0280356	0.0449367	1.06982	1.07592	113.189	112.665	120.532	113.235	112.665	121.219	0.138414
B52	CG9346	0.00710025	15.8521	11.2748	3.6083	3.06396	77.8399	66.3095	239.265	75.4335	66.3095	203.169	0.00326773
B52	CG9356	0.00403429	25.1558	17.5975	4.56478	3.71662	90.3981	73.04	333.411	86.2681	73.04	271.462	0.00193301
B52	CG9386	0.0279852	3.86946	3.1418	2.20656	2.09412	43.1625	39.9491	88.1501	42.863	39.9491	83.658	0.0112232
B52	CG9391	0.00536604	14.2577	13.2404	2.71752	2.65364	148.788	133.502	362.795	148.22	133.502	354.266	0.00250837
B52	CG9393	0.326327	0.459486	0.254772	1.17389	1.12027	232.023	229.364	269.248	231.203	229.364	256.95	0.0835824
B52	CG9411	1	0.0187425	0.335138	1.47135	4.18912	0.420364	0.407557	0.599661	0.494207	0.407557	1.70731	0.316233
B52	CG9416	0.999757	0.00837734	0.0761894	1.00235	1.42691	1.19669	1.19651	1.19932	1.23056	1.19651	1.70731	0.283831
B52	CG9422	0.244473	0.520722	0.947336	1.24618	1.3999	71.8971	70.7362	88.1501	72.622	70.7362	99.0238	0.0662249
B52	CG9436	0.11617	1.16596	0.783064	1.3253	1.25428	333.769	326.684	432.955	332.222	326.684	409.754	0.0366806
B52	CG9444	0.686617	1.2113	0.384197	3.24734	2.10127	4.67123	4.06257	13.1925	4.36083	4.06257	8.53653	0.151014
B52	CG9447	0.0732812	2.21342	4.35723	2.59847	3.69908	15.0667	13.6157	35.38	16.0657	13.6157	50.3655	0.0253275
B52	CG9471	0.116023	0.693408	0.776576	1.34308	1.39719	47.4963	46.4342	62.3647	47.6638	46.4342	64.8777	0.0366467
B52	CG9485	0.031802	3.0686	2.76209	1.63052	1.59104	210.777	202.275	329.813	210.245	202.275	321.827	0.0125571
B52	CG9492	0.0318404	2.93237	2.78971	5.62384	5.60412	4.18491	3.19885	17.9898	4.18071	3.19885	17.9267	0.0125652
B52	CG9510	0.293575	0.173064	0.171644	1.07251	1.11038	37.0804	36.902	39.5776	37.1735	36.902	40.9754	0.0768152
B52	CG9515	0.474134	0.724086	0.30306	1.32062	1.18618	77.9153	76.2847	100.743	77.2316	76.2847	90.4873	0.112742
B52	CG9527	1	0.486138	0.0100433	1.26363	1.0378	62.7762	61.692	77.9559	61.8474	61.692	64.024	0.329088
B52	CG9531	0.211141	0.321782	0.290507	1.22899	1.22326	60.9316	60.0154	73.7583	60.9086	60.0154	73.4142	0.0588101
B52	CG9547	0.0743977	1.49462	1.16908	1.731	1.66695	24.7049	23.5568	40.7769	24.6043	23.5568	39.2681	0.0256676
B52	CG9548	0.994461	0.136679	0.680083	1.25734	1.61091	24.2556	23.8465	29.983	24.8176	23.8465	38.4144	0.254377
B52	CG9550	0.996362	0.0973846	0.502539	1.73042	4.92672	0.363415	0.34654	0.599661	0.437258	0.34654	1.70731	0.259475
B52	CG9578	0.0161727	5.23705	5.64182	2.52553	2.60525	54.1487	49.15	124.13	54.4099	49.15	128.048	0.00688117
B52	CG9581	0.218882	2.68274	1.10376	1.54887	1.30588	134.846	130.086	201.486	132.739	130.086	169.877	0.060563
B52	CG9586	0.000878068	51.9966	54.6141	6.04997	6.15063	141.364	105.759	639.838	142.074	105.759	650.484	0.000457809
B52	CG9588	0.413179	0.753822	2.02539	1.32201	1.66131	67.1838	65.7719	86.9508	68.6716	65.7719	109.268	0.101179
B52	CG9590	0.00801643	9.44458	10.5088	2.61683	2.78552	140.89	127.181	332.812	142.32	127.181	354.266	0.00366231
B52	CG9593	0.0204814	6.26997	4.53734	3.4797	3.04167	22.8934	19.6457	68.3613	22.3197	19.6457	59.7557	0.0085404
B52	CG9596	0.0103991	8.89049	7.69497	3.90792	3.67379	29.128	24.3982	95.346	28.7472	24.3982	89.6336	0.00463315
B52	CG9601	0.027205	3.83353	5.9742	2.03916	2.41681	67.6056	63.2254	128.927	69.1973	63.2254	152.804	0.0109589
B52	CG9603	0.00794703	9.56299	12.2035	2.25121	2.44719	264.927	244.53	550.488	268.122	244.53	598.411	0.00362502
B52	CG9609	0.0211603	4.08167	4.49428	1.86672	1.9365	127.765	120.786	225.472	128.327	120.786	233.901	0.00880549
B52	CG9626	0.988084	1.59873	0.287532	12.4893	3.95096	0.763113	0.432125	5.39695	0.517137	0.432125	1.70731	0.243534
B52	CG9629	0.118908	2.44689	1.25406	2.52511	2.013	19.6219	17.811	44.9745	19.0138	17.811	35.8534	0.0373788
B52	CG9630	0.00904479	9.09909	8.77068	2.6123	2.5817	101.436	91.5916	239.265	101.25	91.5916	236.462	0.00409526
B52	CG9640	0.0510554	1.76867	1.77113	2.85125	2.95195	7.79696	6.9404	19.7888	7.84355	6.9404	20.4877	0.0187555
B52	CG9641	0.0199649	4.29476	5.22993	1.75858	1.85587	227.122	216.189	380.185	228.524	216.189	401.217	0.00832374
B52	CG9643	0.0111293	7.54649	7.39969	2.672	2.70997	58.1195	52.2908	139.721	58.2518	52.2908	141.706	0.0049275
B52	CG9646	0.000929754	49.8793	53.2743	4.62499	4.61029	556.382	448.093	2072.43	555.943	448.093	2065.84	0.000480191
B52	CG9663	0.020639	5.31371	4.22729	1.83601	1.72137	256.541	242.998	446.148	254.684	242.998	418.29	0.0086027
B52	CG9664	0.15362	0.535926	0.703445	2.66457	3.25129	1.75017	1.57535	4.19762	1.81179	1.57535	5.12192	0.0457856
B52	CG9667	0.00182766	30.9195	31.8458	6.61991	6.85139	46.0735	33.5162	221.874	46.5907	33.5162	229.633	0.000912018
B52	CG9674	0.2968	0.351206	0.603995	1.14374	1.19039	1289.43	1277.19	1460.77	1293.4	1277.19	1520.36	0.0775578
B52	CG9705	0.228489	0.302179	0.379492	1.14037	1.15164	1196.36	1185.26	1351.64	1197.25	1185.26	1364.99	0.0626951
B52	CG9706	0.0711761	1.22603	1.43304	1.46058	1.57821	70.2462	68.1535	99.5437	70.7806	68.1535	107.56	0.0247311
B52	CG9715	0.00542728	13.0227	15.6499	2.84979	3.00265	557.602	496.388	1414.6	562.661	496.388	1490.48	0.00253455
B52	CG9740	0.05083	1.80361	2.32102	1.38093	1.46192	316.143	308.313	425.759	317.808	308.313	450.729	0.0186878
B52	CG9743	0.0036949	17.7853	18.7094	3.05095	3.10947	173.823	152.915	466.536	174.42	152.915	475.485	0.00179305
B52	CG9752	0.443494	0.529573	1.31947	1.37226	1.72933	27.3177	26.6562	36.5793	27.9522	26.6562	46.0973	0.107229
B52	CG9754	0.0594411	1.69093	2.44675	1.57223	1.68629	144.524	139.213	218.876	145.583	139.213	234.755	0.0214005
B52	CG9769	0.752515	1.38981	0.407544	1.3324	1.124	285.681	279.488	372.389	281.798	279.488	314.144	0.163301
B52	CG9776	0.00131708	39.2611	40.8055	3.78923	3.76033	713.187	601.364	2278.71	712.029	601.364	2261.33	0.000670023
B52	CG9780	0.0892604	1.00322	0.918357	5.04424	5.12913	1.05653	0.832161	4.19762	1.06123	0.832161	4.26827	0.0298129
B52	CG9782	0.788425	0.0557522	0.12769	2.52648	3.5966	0.261504	0.23735	0.599661	0.278437	0.23735	0.853653	0.170636
B52	CG9784	0.219749	2.05624	0.896106	1.79175	1.48789	54.9657	52.2099	93.5471	53.9081	52.2099	77.6825	0.0607233
B52	CG9796	0.992145	0.377268	0.0747084	1.35252	1.11471	17.2438	16.8478	22.7871	16.9767	16.8478	18.7804	0.249502
B52	CG9799	0.0851138	2.43009	1.42132	1.53744	1.38825	195.543	188.779	290.236	193.665	188.779	262.072	0.0287143
B52	CG9801	0.277803	0.205846	0.179715	1.36281	1.33955	18.9278	18.4808	25.1857	18.8992	18.4808	24.7559	0.0734004
B52	CG9822	0.550049	0.139655	0.261761	1.72141	2.10046	2.55575	2.43848	4.19762	2.61737	2.43848	5.12192	0.126743
B52	CG9839	0.00875353	9.0731	9.14621	3.18339	3.31465	37.7635	32.9651	104.941	38.0519	32.9651	109.268	0.00398445
B52	CG9853	0.0307857	3.12048	4.39119	1.69714	1.88547	124.609	119.074	202.086	126.104	119.074	224.511	0.0121852
B52	CG9864	0.499975	0.261117	0.548653	1.68601	2.20013	4.46321	4.26802	7.19593	4.60949	4.26802	9.39019	0.117447
B52	CG9886	0.034628	3.36273	2.60805	2.28233	2.13508	29.9462	27.5877	62.9644	29.6754	27.5877	58.9021	0.0135364
B52	CG9890	0.0574151	2.17962	1.61413	1.6303	1.54722	62.0912	59.5874	97.145	61.7612	59.5874	92.1946	0.0207331
B52	CG9902	0.00785731	9.80803	10.1608	2.99058	3.0962	59.9613	52.9363	158.31	60.334	52.9363	163.901	0.00359442
B52	CG9911	0.281702	0.211256	0.263487	1.03331	1.0687	210.545	210.079	217.077	211.041	210.079	224.511	0.074301
B52	CG9915	0.135801	0.710476	1.036	1.29809	1.36822	159.715	156.603	203.285	160.447	156.603	214.267	0.0415809
B52	CG9917	0.180907	0.640913	0.436485	1.19624	1.15239	859.273	848.177	1014.63	856.794	848.177	977.433	0.0520807
B52	CG9922	0.00119908	40.5015	48.6255	4.8063	5.39976	150.638	120.149	577.473	155.391	120.149	648.777	0.000616538
B52	CG9934	0.010441	7.73186	7.98073	2.00681	2.01627	347.886	326.004	654.23	348.091	326.004	657.313	0.00465169
B52	CG9940	0.0370932	2.80415	2.36566	1.8653	1.77025	102.008	96.4446	179.898	101.397	96.4446	170.731	0.0143825
B52	CG9941	0.0821985	1.29432	1.03141	1.36306	1.31535	254.58	248.564	338.808	253.79	248.564	326.949	0.0279184
B52	CG9945	0.065838	1.33244	1.55735	1.37193	1.40077	304.144	296.785	407.17	304.715	296.785	415.729	0.0231718
B52	CG9951	0.0111833	10.2579	7.62274	2.49539	2.25504	107.82	98.0454	244.662	106.249	98.0454	221.096	0.00495088
B52	CG9953	0.789505	0.45879	1.58059	1.20772	1.43188	171.659	169.314	204.484	174.189	169.314	242.438	0.170941
B52	CG9961	0.0479163	1.85721	2.21575	2.91201	3.29195	7.89398	7.00152	20.3885	8.07133	7.00152	23.0486	0.0178377
B52	CG9987	0.00498022	14.2739	14.5987	2.37051	2.35839	685.783	628.37	1489.56	685.275	628.37	1481.94	0.0023443
B52	CHIP	0.237689	1.62966	4.54464	1.59605	2.03469	157.039	151.037	241.064	161.456	151.037	307.315	0.064545
B52	CHKov2	0.796653	0.071416	0.170807	1.05853	1.10308	174.026	173.349	183.496	174.541	173.349	191.218	0.172627
B52	CHORD	0.0392793	2.75332	2.24603	1.69685	1.64411	70.6344	67.4987	114.535	70.3971	67.4987	110.975	0.0150782
B52	CIAPIN1	0.9468	0.107004	0.363744	1.06671	1.14692	373.805	372.15	396.975	375.796	372.15	426.827	0.214326
B52	CLIP-190	0.586293	0.200072	0.434191	1.09129	1.15561	451.12	448.391	489.323	453.043	448.391	518.168	0.133333
B52	CR17024	0.328276	0.305472	0.527954	2.40768	3.42747	1.08974	0.996248	2.39864	1.15747	0.996248	3.41461	0.0839738
B52	CR18217	0.0297907	3.38645	2.9294	2.26669	2.19527	35.001	32.2755	73.1586	34.8473	32.2755	70.8532	0.011817
B52	CR30055	0.999996	0.564287	0.0486009	1.26023	1.05753	91.9768	90.4083	113.936	90.755	90.4083	95.6092	0.302776
B52	CR31044	0.00686298	11.2922	11.055	2.98098	3.02417	59.4373	52.5034	156.511	59.5885	52.5034	158.78	0.00316166
B52	CR33294	0.0895721	3.7244	1.84385	2.7448	2.13976	20.4863	18.3516	50.3715	19.746	18.3516	39.2681	0.0299036
B52	CR33963	0.465821	0.757811	2.1508	1.28846	1.67993	50.7563	49.7986	64.1637	52.0559	49.7986	83.658	0.111297
B52	CR40190	0.194879	0.823269	1.64582	1.44408	1.71934	47.0304	45.6781	65.9627	47.8687	45.6781	78.5361	0.0552715
B52	CR40450	0.928447	0.19598	0.0567164	1.47919	1.20326	2.92845	2.83779	4.19762	2.87625	2.83779	3.41461	0.206766
B52	CR40461	0.999755	0.0557195	0.388907	2.27129	6.46664	0.286394	0.264017	0.599661	0.360237	0.264017	1.70731	0.283784
B52	CR40712	0.578645	0.109182	0.201989	1.20457	1.38937	236.662	233.478	281.241	239.539	233.478	324.388	0.131974
B52	CR41509	0.0374423	2.36808	2.57342	2.94634	3.19565	9.65733	8.54816	25.1857	9.79941	8.54816	27.3169	0.0144886
B52	CR42862	0.000106047	207.549	252.228	25.9376	29.0022	3503.3	1315.79	34128.5	3772.13	1315.79	38160.9	8.98958e-05
B52	CR43238	0.999999	0.122412	0.00678484	2.66498	1.89688	0.499982	0.45003	1.19932	0.476938	0.45003	0.853653	0.309332
B52	CR43242	0.0192964	4.41158	5.10793	2.04979	2.16034	89.2113	83.3762	170.903	89.8258	83.3762	180.121	0.00806666
B52	CR43334	0.273711	0.525282	1.02691	1.14443	1.2294	2895.35	2867.74	3281.94	2911.6	2867.74	3525.59	0.0724792
B52	CR43468	0.0505445	1.90026	1.72993	4.11447	4.10004	3.52011	2.91488	11.9932	3.5173	2.91488	11.9511	0.0185782
B52	CR43469	0.861707	0.693895	0.200865	2.86059	1.85101	2.59193	2.30591	6.59627	2.43673	2.30591	4.26827	0.186612
B52	CR43637	0.100959	0.827556	0.815759	10.2679	10.9628	0.377941	0.233605	2.39864	0.388762	0.233605	2.56096	0.032898
B52	CR43651	0.0697995	1.56457	1.24346	2.25001	2.10569	31.1822	28.7836	64.7634	30.9053	28.7836	60.6094	0.0243195
B52	CR43656	0.848051	1.89741	0.479516	3.71889	2.16576	4.19044	3.54744	13.1925	3.82313	3.54744	7.68288	0.183727
B52	CR43683	0.363129	0.183281	0.273492	1.77782	2.10903	2.12875	2.02381	3.59796	2.17344	2.02381	4.26827	0.0908647
B52	CR43730	0.0408751	2.30417	2.16582	4.1603	4.14571	5.23521	4.32416	17.9898	5.231	4.32416	17.9267	0.015607
B52	CR43857	0.313445	0.316419	0.536943	1.18197	1.297	49.2957	48.7048	57.5674	49.6692	48.7048	63.1703	0.0808481
B52	CR43868	0.142121	0.753822	1.18907	1.81952	2.24484	10.4273	9.88713	17.9898	10.7077	9.88713	22.195	0.0430984
B52	CR43933	0.138978	0.746929	0.560901	3.21496	2.91244	2.35471	2.05174	6.59627	2.31333	2.05174	5.97557	0.0423825
B52	CR43943	0.999895	0.399217	0.0468291	2.08008	1.34596	3.3995	3.17116	6.59627	3.2443	3.17116	4.26827	0.288871
B52	CR43944	0.999999	0.036721	0.455626	1.25262	1.91056	6.81501	6.70214	8.39525	7.10898	6.70214	12.8048	0.307914
B52	CR43957	0.998811	0.056167	0.326492	1.17692	1.46599	16.4968	16.3045	19.1891	16.811	16.3045	23.9023	0.271069
B52	CR43961	0.255882	0.378322	0.254935	1.49726	1.42096	7.44807	7.20908	10.7939	7.4114	7.20908	10.2438	0.0687922
B52	CR44019	0.873103	0.0982383	0.275215	1.99109	2.83444	1.28428	1.20469	2.39864	1.35202	1.20469	3.41461	0.189627
B52	CR44046	0.217379	0.306149	0.360692	2.67586	3.0474	1.24569	1.1205	2.9983	1.27344	1.1205	3.41461	0.060202
B52	CR44047	0.517602	0.352984	0.163124	2.1226	1.76263	3.64386	3.39014	7.19593	3.5625	3.39014	5.97557	0.120831
B52	CR44054	0.996629	0.22213	0.0391921	2.07361	1.47595	1.23954	1.15675	2.39864	1.19345	1.15675	1.70731	0.260512
B52	CR44069	0.221078	1.40105	0.677875	6.15445	4.04364	1.70192	1.26666	7.79559	1.52368	1.26666	5.12192	0.061062
B52	CR44083	1	1.24836	0.0448692	4.10714	1.46169	2.81997	2.33607	9.59457	2.40798	2.33607	3.41461	0.323982
B52	CR44092	0.139321	1.54035	0.857914	2.7114	2.20563	5.17431	4.64441	12.5929	5.01771	4.64441	10.2438	0.0424807
B52	CR44119	0.286228	0.741631	0.384587	2.76538	2.21439	3.87787	3.46953	9.59457	3.75042	3.46953	7.68288	0.0753053
B52	CR44124	0.66275	0.913701	0.312731	3.24997	2.10297	2.33408	2.02964	6.59627	2.17888	2.02964	4.26827	0.146599
B52	CR44135	0.258679	0.388073	0.637824	2.09441	2.98152	2.76484	2.57683	5.39695	2.91723	2.57683	7.68288	0.0693307
B52	CR44169	0.17723	0.473868	0.657658	2.25183	2.67135	3.46228	3.19559	7.19593	3.55166	3.19559	8.53653	0.0512259
B52	CR44183	0.999185	0.690463	0.0998973	2.52079	1.4354	3.93007	3.56829	8.99491	3.67187	3.56829	5.12192	0.274253
B52	CR44201	0.215823	0.371597	0.51542	2.5233	3.07891	1.83249	1.66355	4.19762	1.89411	1.66355	5.12192	0.0598385
B52	CR44206	0.00119532	40.7835	45.9872	7.89562	8.65742	50.6643	34.7085	274.045	52.427	34.7085	300.486	0.000613221
B52	CR44218	0.537059	0.271763	0.605439	1.44972	1.7413	13.6333	13.2364	19.1891	13.8906	13.2364	23.0486	0.124541
B52	CR44222	0.999987	0.0117627	0.132046	1.3765	1.71459	3.5726	3.48512	4.79729	3.65115	3.48512	5.97557	0.298588
B52	CR44265	0.999996	0.0156332	0.182455	1.18497	1.53353	5.63524	5.56659	6.59627	5.76459	5.56659	8.53653	0.303172
B52	CR44283	0.0707727	2.725	1.64079	2.66482	2.22554	18.7503	16.8771	44.9745	18.256	16.8771	37.5607	0.0245957
B52	CR44321	0.60625	0.199207	0.443368	1.73011	2.23901	3.99821	3.81263	6.59627	4.12756	3.81263	8.53653	0.136797
B52	CR44331	0.0816859	1.11734	1.02513	1.56899	1.56824	37.2891	35.9263	56.3681	37.2873	35.9263	56.3411	0.0277639
B52	CR44381	0.0340264	2.60197	2.82799	4.72684	5.32708	3.80118	3.04471	14.3919	3.92302	3.04471	16.2194	0.0133138
B52	CR44382	0.0323753	3.47217	2.75984	6.72739	5.94425	3.57199	2.58498	17.3902	3.43703	2.58498	15.3658	0.0127353
B52	CR44384	0.999482	1.50297	0.191019	2.41807	1.2682	5.15729	4.71184	11.3936	4.79609	4.71184	5.97557	0.277977
B52	CR44390	0.219819	0.37569	0.285992	4.0358	3.83014	0.535971	0.445756	1.79898	0.529859	0.445756	1.70731	0.0607444
B52	CR44512	0.998088	0.0389325	0.217082	1.43751	2.04638	2.1466	2.08576	2.9983	2.23126	2.08576	4.26827	0.266378
B52	CR44517	0.604939	0.210429	0.4768	2.03167	2.8922	1.89274	1.77094	3.59796	1.99434	1.77094	5.12192	0.136541
B52	CR44520	0.948018	0.229841	0.88264	6.24058	17.7677	0.129662	0.0960905	0.599661	0.203505	0.0960905	1.70731	0.214757
B52	CR44690	0.653351	0.342108	0.924034	1.29301	1.84068	9.92943	9.73918	12.5929	10.285	9.73918	17.9267	0.145134
B52	CR44779	0.176922	0.574973	0.896629	1.44238	1.73331	32.9565	32.0124	46.1739	33.5774	32.0124	55.4875	0.051115
B52	CR44807	0.94195	0.564134	0.144765	1.5966	1.19624	7.41996	7.13613	11.3936	7.22949	7.13613	8.53653	0.212355
B52	CR44842	0.96666	2.471	0.475197	4.96854	2.2505	3.3577	2.65522	13.1925	2.87657	2.65522	5.97557	0.22439
B52	CR44873	0.07003	1.41856	2.03904	4.19945	5.55116	2.42554	1.99913	8.39525	2.60569	1.99913	11.0975	0.0243911
B52	CR44899	0.352042	0.236801	0.383284	2.32229	3.30592	0.842947	0.774658	1.79898	0.893745	0.774658	2.56096	0.0886748
B52	CR44907	0.993619	0.0977198	0.46718	3.32676	9.47169	0.208214	0.180254	0.599661	0.282057	0.180254	1.70731	0.252536
B52	CR44957	0.0905505	1.38114	0.991688	8.41497	6.65513	0.95839	0.64135	5.39695	0.883145	0.64135	4.26827	0.0301122
B52	CR44958	0.267384	0.248944	0.325837	8.12284	11.5634	0.10888	0.073824	0.599661	0.125813	0.073824	0.853653	0.0711292
B52	CR44969	0.979364	0.778007	0.164522	4.72666	2.2429	0.950323	0.761206	3.59796	0.824279	0.761206	1.70731	0.234321
B52	CR44977	0.0163816	5.17628	6.45266	4.06429	5.0311	8.1735	6.78701	27.5844	8.61095	6.78701	34.1461	0.00698189
B52	CR44993	0.999997	0.0457674	0.500843	1.03464	1.39325	21.4942	21.4447	22.1874	22.0069	21.4447	29.8779	0.304062
B52	CR45039	0.11542	0.699308	0.710285	1.85705	1.91434	9.89947	9.36442	17.3902	9.93524	9.36442	17.9267	0.0364905
B52	CR45047	0.963993	0.716809	0.165	3.33876	1.90117	1.03805	0.898028	2.9983	0.95198	0.898028	1.70731	0.22264
B52	CR45048	0.135052	0.653045	0.550597	1.42059	1.39634	36.4525	35.4582	50.3715	36.3952	35.4582	49.5119	0.0413561
B52	CR45054	0.0841721	1.06437	1.35598	1.46421	1.52321	98.7993	95.8334	140.321	99.1762	95.8334	145.975	0.0284462
B52	CR45142	0.946877	0.0626566	0.205079	1.42379	2.02686	1.73228	1.68468	2.39864	1.80001	1.68468	3.41461	0.214352
B52	CR45146	0.996034	0.10995	0.559023	1.2901	3.06089	1.42142	1.39445	1.79898	1.58604	1.39445	4.26827	0.258485
B52	CR45166	0.999965	0.709033	0.0742662	2.77687	1.43747	2.65682	2.37543	6.59627	2.44471	2.37543	3.41461	0.2947
B52	CR45171	0.201022	0.352704	0.431709	1.99742	2.27475	4.80272	4.50327	8.99491	4.88598	4.50327	10.2438	0.0565191
B52	CR45177	0.06776	1.62535	1.28744	1.85025	1.7418	42.4661	40.1881	74.3579	42.1755	40.1881	69.9996	0.0237145
B52	CR45203	0.430466	0.0705005	0.0807867	1.57904	1.6859	1.57769	1.51905	2.39864	1.58851	1.51905	2.56096	0.104551
B52	CR45210	0.57877	0.730672	0.277956	1.81178	1.47381	14.6534	13.9011	25.1857	14.3402	13.9011	20.4877	0.132002
B52	CR45217	0.768716	3.1124	0.776576	3.76969	2.1216	8.1032	6.84018	25.7854	7.35165	6.84018	14.5121	0.166968
B52	CR45298	0.696555	0.147655	0.340133	1.51999	1.94742	4.08191	3.94515	5.99661	4.19433	3.94515	7.68288	0.152709
B52	CR45350	0.0254154	3.65232	3.45855	3.10517	3.11295	15.6356	13.7113	42.5759	15.6427	13.7113	42.6827	0.010287
B52	CR45377	0.999934	0.183115	1.6432	1.23839	2.35057	13.2819	13.0741	16.1908	14.2513	13.0741	30.7315	0.291405
B52	CR45380	0.287337	2.5951	0.991738	4.83844	2.91408	4.04694	3.22235	15.5912	3.63354	3.22235	9.39019	0.0755644
B52	CR45479	0.418133	0.119176	0.167514	1.41157	1.56291	3.92826	3.82336	5.39695	3.96684	3.82336	5.97557	0.102195
B52	CR45523	0.175496	0.877338	1.70385	3.27381	5.12652	2.10935	1.83169	5.99661	2.33559	1.83169	9.39019	0.0507868
B52	CR45564	1	0.707082	0.0368754	3.56854	1.45144	1.37771	1.17629	4.19762	1.21169	1.17629	1.70731	0.317142
B52	CR45565	0.687225	0.414033	0.157501	1.7787	1.4243	5.67419	5.39416	9.59457	5.54674	5.39416	7.68288	0.151151
B52	CR45604	0.0966666	2.68978	1.44676	3.03029	2.36564	6.96487	6.13455	18.5895	6.69305	6.13455	14.5121	0.0318009
B52	CR45620	0.103564	0.807534	0.964849	2.27564	2.56461	6.86215	6.32431	14.3919	6.98398	6.32431	16.2194	0.0335393
B52	CR45641	0.0546588	1.95877	1.61142	5.11354	4.63236	3.28743	2.57992	13.1925	3.20467	2.57992	11.9511	0.0198835
B52	CR45642	0.207978	0.389721	0.305356	2.733	2.59372	1.46859	1.31649	3.59796	1.45637	1.31649	3.41461	0.0580726
B52	CR45711	0.500579	0.0866931	0.0558325	1.72423	1.63637	1.09373	1.04335	1.79898	1.08762	1.04335	1.70731	0.117569
B52	CR45713	0.40099	0.176957	0.283138	2.49666	3.55415	0.5283	0.480369	1.19932	0.562165	0.480369	1.70731	0.0986036
B52	CR45716	0.851166	0.110765	0.300241	1.5392	2.19115	2.01798	1.94796	2.9983	2.10265	1.94796	4.26827	0.184383
[truncated: 64,533 more rows]
