# Supplementary material for: Extensive cross-regulation of post-transcriptional regulatory networks in Drosophila
Source: Genome Res. 2015 Nov;25(11):1692–702. doi: 10.1101/gr.182675.114 (PMC4617965; doi:10.1101/gr.182675.114)
Supplement: Supplemental Material [file supp_gr.182675.114_SuppTable_4_-_Mean_FC_Matrix.xlsx]

## Sheet: results_matrix.csv
B52	Upf1	Srp54	elav	ps	U2af50	CG17838	qkr58E-1	Rbp1	SF2	Rm62	qkr54B	SC35	tra2	mub	msi	Fmr1	Cbp20	snRNP-U1-70K	CG6227
CG12065	5.13959	1.70375	3.37846	1.95094		2.92006		1.83796	1.77949	4.70507	2.71086	1.96346	2.90082	1.81775	3.11662				1.94828	2.15978
CG3008	3.39204	3.05576	1.62263			2.65576	2.01759	1.63923	2.15069	5.38616	3.29428	1.68218	2.39568	2.38745			1.94522		1.97456	2.08386
CG7456	2.36809	2.69342	2.44301			3.00798	3.26524	1.66451	1.72046	2.32657	2.45483	1.55837	1.64975	2.79734			1.6415		1.71223	2.09301
Hsp26	4.56556	12.7869	3.55244		13.3669		4.36014	5.59927	5.14612	3.87975	1.8027	4.74206	1.9239	3.69806		3.02888			3.18348	1.94574
Hsp27	7.52129	2.26045	1.98601		3.48812		2.57017	5.26692		2.3305	1.53477	1.91773	3.47123	2.8818		1.61976		1.62618	1.87219	1.72958
Smg5	2.05811	4.08823	1.66412			3.38564	2.83172	1.59172	2.09416	1.89951	3.23365	2.42986	1.70512	2.30578	1.62939		2.164			1.82585
Aac11	6.97817		13.1292	3.61854	22.305	2.35823	2.98926	5.2822	1.99893	2.86628	1.80367		2.44904	2.53422					2.31002	3.97822
Aldh-III	2.74334	2.01357	7.16624	4.70041	3.34854	2.53736		1.66465	2.70981	1.95163	1.71552		1.70129		3.00451	2.83911				2.34687
Arc1	1.5901				7.20798	2.04691	4.51033	21.3845	8.45644	2.14439	2.53486	16.961	2.30003	1.92054	2.09952		6.882	2.27859
Cdc5	6.17962	2.32614	2.37307	1.68177		3.45138			2.06139	4.78899	3.89091		3.14487	1.99289	3.41663		2.23299		2.15568	1.90681
CG8801	2.52969	1.99462	1.72409		4.23141	2.3723	16.349		4.47987	3.13057	2.24004		2.56874	4.581	2.51901		2.28988		1.55227
CG9715	2.92622	1.89139	2.39			1.9397	2.43306		4.32136	2.58247	3.02248		2.92781	3.20403	1.73323		2.42406		1.59673	2.08026
Dmtn	2.82886		3.17383		8.42407		1.91229	2.82916	1.51889	1.81573	1.68526	2.93425	2.06369	1.68087		1.95071			1.98696	1.6805
Not3	1.74747	2.47842	1.82958		2.49139	1.57813	2.52034	2.96225	3.38455	1.78353	2.15278	2.35878		3.1245			1.99615		1.65873
Ranbp9	2.2698	1.849	1.98149		6.23791	3.2523	2.41953		2.50877	2.16737	2.57733		1.76963	1.62078			2.38295		1.78042	1.78761
Rpn10	6.57443	3.42882	1.88185		2.01026		2.85104	1.96198	1.9395	6.47163	1.89946	2.09618	1.91724	1.93947			1.77213		1.85514
Zn72D	2.60813	2.16618	2.49243			2.22515	1.6617	2.67454	2.27153	2.03389	3.1081	1.99764	1.94464	1.91708					1.68874	1.7056
Atx2	1.86442	1.78441			3.33748	1.83125	2.08194	5.13463	4.0569	1.96006	2.89687	4.44888	2.34977	1.91211	3.97737
CG31550	10.5923	2.15974	9.14437			2.14886		2.86502	3.17926	6.05138	4.4549		4.09441	4.53139	1.93024				2.69211	3.16718
CG44254	2.10305	2.73974	1.70073		1.75071	3.06678		2.06025	4.11361	2.53527	2.07542		2.02517	2.26247	2.26226		1.96264
CG5514	3.65465	2.08501	2.47123		2.05501				3.70885	3.41142	2.73106		2.42746	3.26962	8.68284		2.14544		1.68073	1.78614
CG5792	3.17803		2.28512			2.1848	2.44571	2.94593	2.00534	2.13443	2.28487	2.17248		2.67219	1.77986		2.36792		1.68161
Cnot4	2.52628	2.23496	3.32542		5.42991	1.8469	2.21748	2.55913	2.92982	2.32838	2.7256		2.22886	2.84398					2.24518
eIF-2beta	17.8202	2.04147	5.04783			1.73017	1.62897	1.73997	1.75985	4.27569	2.02673		6.8442	13.7296					2.04521	1.68384
Gpo-1	2.08123	2.55802	4.33147		2.21127	1.94825			2.37188	1.90913	2.33888		1.86772	2.15963	2.09249		1.58508			1.86227
Hsc70Cb	3.15124	2.47338	2.02873				2.10205	9.90928	1.61248	2.31131	2.38571	6.49774	1.74938	3.0474					2.0878	1.71385
kra	2.00296	3.26014	4.96939		1.74045	1.59562	2.69547	1.68579	2.2061	2.88312	1.80405			2.422			2.25027		1.8201
lig3	2.55383	2.68409	3.43876			2.24091	1.78067	1.79981		1.85547	2.00383		1.60703			1.88114	2.05611		1.64247	1.87916
Moca-cyp	7.52753	1.90467	4.1731			2.22027	1.70243	1.54607		5.02573	3.87252		3.76297	3.94211			2.11397		2.40304	2.11708
mu2	3.31751	1.62474	3.75666		2.34827	2.12413		1.74818	3.0536	4.19063	2.80377		1.62377	2.99352			2.87248		1.94623
nonA	5.49954		1.97949	3.68305			3.02738	8.05853	1.69136	4.60528	2.27235	2.26872	2.69207	3.69494		1.66142			1.98382
NUCB1	8.16899	3.87796	2.51385	2.17472	2.0139			1.85751	3.14029	4.26663	1.99074		9.17206	2.73486					1.74311	1.63882
pcm	3.52337	1.74159	3.21577		1.91276	4.31199			4.87091	1.75374	2.73753		1.6345	1.5774			2.41499		1.66051	2.22025
RnpS1	3.53979	2.51801	1.69568			1.80681		3.02504	2.86922	3.89402	2.55328	2.61599	2.36017	2.25983			1.72699		1.80015
Sec10	1.88555	3.00917	2.20934		2.15791	1.77343	2.20413	1.58304	1.68938	1.74349	2.09143	2.47834	1.65977	2.41841
Tango1	6.09266	1.7249	3.19546			1.99915	2.16498		1.79357	4.28159	3.53807		4.33369	4.40879			1.91109		1.9293	2.1193
Xe7	7.91888		10.7561		40.3238	3.54469		3.25359	1.79452	2.40383	1.73378		1.97329	2.1731	10.7695	2.62133				3.08217
Xrp1	1.78024	4.10317	2.78639	2.20837	7.09845	2.51153		1.69651	3.47389		2.25483		2.42311	3.00965	4.01478					1.7749
yps	2.79869	1.6109		4.80683	3.24995		4.88648	2.40562	4.06434	2.33053	1.63962	3.34392	2.8181	2.29832	2.24222
armi	3.38542	1.71187	2.57389			2.30032	2.01028	1.7947		3.2498	2.69823		3.61593	1.67177			2.23524		1.88778
Arp5	4.46162	1.86911	1.64847		4.16996	1.90114			3.50127	4.58938	2.63288		5.2325		2.25114		1.84395		2.14369
ball	2.16264	1.8277		1.65419	1.71678	1.92142			1.86511	2.37763	2.11041		2.24185	3.00004			2.33014		1.57867
Cct5	3.09275	2.53089	1.59665		14.5758				2.81959	3.08783	1.95046	1.74697	2.23441	1.91762	1.68874				1.60109
CG11266	1.68703	2.64457	2.19796			1.88969	3.59493	2.05472		2.20784	2.27156	1.94195	2.03576	1.65329	1.60541
CG14961	4.73365		14.9615			5.01055		6.27979	2.48776	2.85145	3.14924		2.57623	1.92583	4.05252				2.72065	3.5408
CG16941	5.74672	1.73499	3.09074		3.44303	2.48769			2.40445	4.1553	3.11603		4.98502	3.53055					2.74278	1.81093
CG18547	3.49546	2.69993	4.16067				2.19934	2.8098		3.60802	2.21893	2.60367	2.03395	3.60676			3.20142			1.70918
CG2807	4.4969	1.56995	3.0093			2.46081	1.98388			4.87856	3.76429		1.97771	1.76334			3.11037		2.01914	2.09178
CG31211	2.94332		4.90772		2.2822	3.29856		2.01142	1.9655		1.79714		2.13071	2.27075	3.66929				1.88925	1.86299
CG31368	2.25205	1.8312	1.76846			3.18808			2.20936	1.96317	2.51223		1.67912	1.73716			2.39213		1.77483	1.83186
CG33123	3.23652	2.0141	1.74054			2.22547			4.20255	2.03212	2.64971		1.98056	2.10114			2.20871		1.60763	1.82837
CG34334	2.73869	2.11023	1.70533		5.77557	3.61872			3.56329	2.61365	2.87537	2.00977	1.54291	2.08671	7.81478
CG4294	4.5996		5.70419	2.38565		2.85166	3.86944	9.11633	1.98996	2.81198	3.12565	7.61612		3.06195					2.98003
CG4951	2.73674	1.83163	2.41412	1.78129	3.52405	2.32328			3.11351	2.80937	2.14654		3.61366	3.08743					2.04316
CG5355	1.8717	2.94891	1.96868			1.75212	2.04492		1.65736	1.75018	2.33651			2.34202			1.75178		1.58661	1.72311
CG7028	4.24814	1.94177	6.28627			1.85832	2.07586	1.95734		2.95039	2.95816		2.24297	3.41997					2.51227	2.4281
CG7997	2.15996	2.715	2.62536			2.89284	1.8382	1.77397	2.97168	2.33702	2.61231				2.12595		2.03608		3.65017
CG8010	3.65411	1.97144	2.68791					3.437	2.67215	5.26907	2.70022	3.33238	5.48907	2.78201			2.14305		3.34741
CG8042	5.22055	2.26314	2.20628				2.33197	1.86002	1.77921	5.25361	2.72547		5.57032	1.76433					1.67967	1.60528
CG8209	3.40751	3.39276	1.58684				2.28693	10.2758	1.56953	3.69507	1.68773	2.87121	3.59974	2.88919	2.39588
CG8549	4.72201	1.97816	2.22872	1.57933			1.68691	2.35553		4.38992	1.58432	1.81353	2.65349	5.67876					2.25594
CG8929	3.53369	1.81594	3.10963		6.05827	2.79391		7.64698	2.50895	1.88986	2.04021			2.19935	6.22324					1.56679
CG9586	6.1003	2.12641	1.91359	2.89204			3.02043	5.19912	1.58683	6.04359	1.73826	1.83938	1.81013	5.76383
CG9646	4.61764	1.97392	7.4206	2.96846		1.89299	1.81041	1.55738		2.95437	2.35772		2.52828			5.92014				2.3104
DIP1	2.63272	2.12394	5.54347		3.66362	3.11727	2.725	3.61948	3.78718		1.87483				16.7932	1.65322				2.02617
DOR	3.59987	2.19008	2.07406	1.75616			2.79484	3.80859	1.81683	1.92345		4.50315	1.86093	3.06452	1.73049
dre4	3.79221		2.46166		2.3543	1.63486			1.9719	2.9366	2.35714		1.80764	3.07142			1.78406		1.92645	1.93099
eIF2B-delta	2.70167	3.00613	4.02235		1.61041	2.13158			3.21183		2.65126		2.63462	4.82596		1.72142			1.83214	2.05699
GM130	2.86068	2.35292	1.70075		11.8403				2.85497	3.74643	2.21035		4.12993	1.81145			1.89552		1.91764	1.6388
hdly	1.84284	3.15847	8.71476			2.74203	3.71581	6.07601	2.73386		2.01659	2.6061		4.57006		3.46334	1.69281
Hsp68	2.53837	2.31028					3.08775	4.14772		2.44572	1.61737	1.94985	2.84252	1.54862		1.67264			2.76801	2.08155
IntS11	2.68396	1.97201	1.63943			2.71705			1.75963	1.67625	2.30579		1.70693	3.26723	1.63731		2.21556		2.04913
Mocs1	1.87546	3.42564	5.04047		42.7489		3.288	3.34358	2.19844			2.94267		7.70699		1.64267	1.55485		2.07454
NAT1	4.24404	2.28267				2.0124	2.25669	4.30466	2.07865	2.75105	2.45007	3.12134	1.70024	2.72033						1.83922
Pitslre	3.09147		2.67914		4.50693		1.93736	2.63311	1.55085	2.24837	1.85957		2.08258	1.66865					1.94036	1.62575
Pk92B	3.01597	2.55514	2.85298			2.81965			1.65296	2.13118	2.30632	1.72248	1.84529				2.56278		2.09175	1.9139
PP2A-B'	1.62601	2.04375	2.18496		1.90146	2.60337		1.66365	3.18726		1.85288	1.76789	2.31845			1.72977	1.61719
pUf68	2.55864	1.75756	8.74841	5.6709	3.7739	4.29775	2.26318	2.65477					2.10191	1.64469	1.5565					1.89378
RhoGEF2	2.78749		5.12106	2.18867		2.72923			2.22694	1.71146	2.59182			1.86173	1.86352	4.82782			1.60597	2.45296
Rpn2	6.49854	2.36382	2.1024			1.72162	1.65701			3.93684	3.30672		3.96635	2.2206	2.14874				1.97697	2.17372
Rpt5	2.24069	3.01842					2.5971	1.85002	1.61356	2.50938	2.00955	1.92242	2.45022	2.89932					1.68613	1.62298
scaf6	3.61905	1.90798	7.07055			2.77208		2.05715	4.67279		2.30944		2.57703	3.18705	1.68882				1.69839	2.6435
Smc5	2.9097	2.34953	3.52397			2.14809	5.105	1.83049		2.40998	2.95772		2.1102	2.58639			2.32911		1.55762
Smg6	3.65064	4.51439	6.33862	4.00474		1.81166	1.70452	1.70323		2.95106	2.2878						1.99456		2.16562	2.05704
sol	3.09724	2.15544	2.49018		11.5871	1.55393			3.74464	1.78866	1.87263		1.93344		3.16985		1.80921		1.60529
stv	2.27572	5.29853	8.12829			2.50222		9.22289	2.64152	2.17701	2.29566	2.17578	3.16841			4.11297			3.80367
su(w[a])	5.72595		7.21478			3.79044		1.91793		2.88453	2.0754		1.99635	2.17658	1.55815	1.77854			2.47719	2.79265
TSG101		3.0385	2.79695		19.0401	2.6159	4.06396	2.6131	3.55607		1.80855	2.64777		2.06096	5.06434		1.64224
Uba2	3.24059	2.37013	2.66729			2.07999	3.9397			3.15337	2.45705		1.6614	1.84807			1.83965		1.90748	1.68104
Ugt86Da		4.79245	2.43227	1.65019	3.34498	3.19966	2.50035	2.97758	2.09299		1.97093			1.74636	2.56103		1.77702
AGO2	3.13119	1.70669	1.62531	9.08224		1.92975			3.90359	2.83146	3.64295		1.72724	1.74953						1.69915
Ate1	2.16433	2.22803	7.80235					2.02259			1.66904	1.9206		2.38558			1.68593	1.66143	1.67898	1.82743
Brd8	4.10356	1.81358			5.58337	1.88275			1.91562	4.02378	2.78938		2.0866	2.43125			1.88096		2.17937
Cdc37	17.103	3.12416	4.57117					1.87696	1.77353	10.0356	3.13994		8.03565	5.42864					2.61453	2.24748
CG1091	3.6071	2.65728	8.93104			2.6602		1.58653	2.22713		2.04935			1.78038	1.87613		1.97816			1.96648
CG12582	2.77703	2.02236	5.19009			4.41355	1.91623		3.03251	1.59517	2.15109					1.82614	2.00847			1.91832
CG1582	2.9528	2.42479	2.14489			1.65335				1.83694	2.53181	1.5676		1.70298			2.17193		1.87953	1.93905
CG30122	8.27522	1.84194	3.48181			1.55405			1.9312	5.4553	3.74392		4.8275	3.019					2.29477	2.60548
CG30389	3.44129		2.28357	1.79838	4.10847		1.68916		2.59879	3.59133	1.66598	2.20545	2.61467		1.8369
CG31712	4.09999		4.8643	36.9278	2.65931	3.50572	2.72619	5.72266		2.89038			2.40042	2.96864		2.19541
CG32344	6.32411		1.6867			2.03066		1.65548	1.84402	3.31825	2.98416		2.49544	4.44056			2.03046		2.27401
CG34417	1.82788	1.90947	1.65558	1.5875		1.83469		1.608	2.31055		2.25664	2.37882		1.88664	4.76181
CG3776	3.26926	2.37086	2.305		38.6439		2.81886	2.37998	2.81319	2.75132			6.21382	2.42625					17.8765
CG42390	6.50696		3.04776		6.20776		2.02801	3.11585	3.06141	3.92784	2.38402	2.6692	5.17385							1.67527
CG43427	2.42518		2.29718	1.70557		1.98232			1.64598	2.06449	1.98464	2.32967	2.07797		2.03925	1.96545
CG4364	7.34825		2.31647		1.7286	3.22565			2.1856	3.63402	3.17069		3.40706	4.36122	2.0001		1.67202
CG4749	2.27899	1.92543	2.43691			1.5714		1.75366	2.6464		1.93448	2.10995	1.93519	3.17244			1.99582
CG4849	5.83007		3.42055		1.75932	2.13385				3.53506	2.42755		1.95219	2.54933			1.82487		1.88429	1.68588
CG5844	5.57408	2.82609	1.94194	7.01402		2.01305	3.14859		1.57513	3.63589	1.93413	1.69705	2.32213
CG6745	5.10951	2.19489	3.25524			1.94743			1.88263	3.15679	2.66771		2.17178	2.6303	2.32732					1.84597
CG7139	1.9823	1.73656	2.11293			1.60316		7.18332	3.27277	1.64751	2.1521	4.12855					2.08434			1.59147
CG7324	2.07155	2.2876	2.52112			2.61036			2.91253	2.25449	2.5706				3.44186		2.06213		1.55028	1.72766
CG7358	5.61886	1.66093	2.61591					1.57048	1.72505	5.67565	3.69701		8.46742	1.89278					2.85877	1.75358
CG7518	3.17475	1.64987	1.78885		2.97107	2.34715			2.35522	1.8658	2.50889		1.56219	1.75978						1.89412
CG8258	1.86956	2.75937	1.82752		11.4203				2.58281	1.8489	2.46513		1.59331		1.74194		1.9517		1.7687
CG8368	2.78266	2.04471				1.60481	3.11903			3.34109	3.12565	1.53883	2.56832	4.11209			2.05021		1.88441
CG8507	6.44808	1.98431					3.66425	3.02445	1.8261	8.53449	1.72539	3.25661	2.4039	3.27774					2.5989
CG9391	2.68558	3.28295	1.78143				1.89789	2.62314		4.14253	1.66091	4.88778	1.60101				1.72269	2.5087
CG9663	1.77869	1.69584	6.28085		1.65947	2.02893	2.27611	3.25845	1.58353			1.5945				1.73443				1.69931
chico	2.74426	2.0763	3.05526			1.66166	3.18644	2.60609	2.08765		1.7834	3.01297	2.16304							1.64299
Cirl	2.59417		4.28859		1.57128	2.72838		1.6885	2.32851		2.0587			1.79195	1.81464				1.57471	2.02446
CR31044	3.00257			3.39228	2.30101	1.55318	10.9347	8.3236	2.03522				1.93717	3.71373				2.11083	2.39331
CSN6	4.48656	2.04097					2.50203	2.17734	2.02666	4.84401	1.758	1.89704	1.99028	5.07762				1.91447
CSN7	4.0648	3.10497				1.55506	16.6067	12.752	1.75045	4.71507		6.43122	2.24993	2.73446			1.96015
Dcr-2	1.754	3.14787	2.05279			3.12597	3.01609		1.78506		2.48275			1.57329			1.98233		1.90053	1.92289
dor	2.81512	1.79545	1.67352		2.8449	1.77425			2.57419	1.80649	2.19475						2.22169		2.06324	1.89147
ebd1	8.91982	1.68307					1.76908	2.44417	1.90929	5.10636	2.76483		6.363	2.93382					2.30122	1.66217
fidipidine	3.78254	2.31225	1.81227		1.83983				1.73424	3.68372	2.42363		2.56242	2.87274			1.58536		1.81209
g	3.67045		1.91191				2.1353	6.29993	1.73932	2.7884	1.77471	3.91628	1.60128	2.08571						1.67349
GCC185	5.84291	2.13209	2.40353		2.07786			1.64156		5.57468	2.40288		3.69369	2.52093		2.73478			2.11089
GlyP	1.68158	5.05713		3.31723	1.77293				4.80535	2.31425	4.1398	2.45225		2.12024			1.74263			2.28228
Gp93	3.12596	2.02453	2.16514		2.14401	1.53541			2.81427	1.90939	2.04781			5.41165					1.58209	2.05255
Grip91	1.98076	2.23601	1.77005		2.4599	2.15604				2.03935	2.05332		2.84026	1.78148			1.72066		2.4415
Hsc70-4	4.01007	3.95579			3.51707				1.97412	2.19553	1.77488	1.89941		1.76321	1.82271		1.70296			1.63354
lark	1.98059	3.02106	2.29244			2.6133		2.29178	2.59103		2.18701			1.61991	1.74398		1.77543		1.79682
Lk6	6.12579	1.78071				1.68121	1.90529	3.38819	1.85562	4.21857	1.80178	2.85866	4.6885	2.49019
Mad1	4.21743	1.74982	2.90151			1.92958		1.82012	2.44976	3.20377	2.36316		1.90273	1.76017						1.79308
Mbs	2.57489		2.4668	2.08231	1.69227			2.30135	1.60086	1.69539			2.36222	1.85569		1.69818				1.78899
mRpL37		1.88989	2.67484		3.88773	4.08559	2.41366	2.00569	2.85244				1.51519	4.02809	2.85819		3.49648
mRpL40	10.2531		3.13074				3.30711	1.61165		3.44088	2.27349	1.64964	4.72102	17.2769			2.12905	2.91627
mRpL42	4.8218	2.31052			2.20757	3.183	2.87534	4.9847	2.04592	1.96846		2.88557	2.3209					5.60167
Nmnat	2.13075	2.43825	8.05287		2.6431			2.51466	1.79418			1.61202	2.37314	1.94676	2.18367	6.60365
Oga	1.70621	2.34136	2.09395		2.15015	2.94089			1.76162		2.39583		1.53764		4.97414		1.91863		1.70214
pog		1.88699	3.6114	2.08158	3.85045		2.32014	4.10859	3.10223			4.10378	1.90786		2.68785	2.53984
pps	2.30262	1.59871	2.06444			1.86413			2.01964	1.82567	2.7806		1.60717	2.43891	2.59909					1.72427
pyd	1.99143		2.27729	1.88657		1.92901	1.88495		1.67994		1.97594	2.61616			3.02148	2.62142				1.97295
qkr58E-1	1.77852		1.81918	2.82307	4.10493	1.88073	2.29572		2.50782			5.32332		2.47292	3.71324				1.83187
RAF2		1.83323		2.88063	1.53586	3.01722			4.98115	2.28136	2.22626			1.79035	3.01824				1.65674	1.96176
row	2.49913	1.8046			4.78095	2.71553	1.82		2.76796	2.10677	2.54757						1.76912		1.59743	1.65548
Rpn5	4.50588	2.98818	1.83146		1.74002		2.2025		1.75908	2.13506	1.81599		1.97499	3.88981	1.67479
SmD2	6.88099	1.88941			3.74724		2.14333	4.58403	2.66009	2.78919		2.82523	5.4693	4.11841				2.94871
Srp72	2.64698	1.99689				1.85828			2.45684	2.78996	3.61979	1.72113	1.69476	4.52491			2.4679			1.8958
su(Hw)	3.85899	1.77403	2.11884				1.96194	1.67091		3.13855	2.42091		2.13315	3.72986					1.67781	1.93813
Tdrd3	7.18666	2.16936	2.19345					2.51126	2.50761	5.41566	3.41273	2.01492	4.11423	2.87506					2.47436
Ubi-p63E	3.31782	1.88732	1.87519			2.78292			4.56378	3.61003	3.72465		4.65778				1.75949		1.82737	4.81773
Ubp64E	2.35734	1.53772	2.53705	2.49458		1.54411	1.77262			1.67267	2.15945	2.47584	1.55478							1.7419
Unc-115a	1.72998		4.01045		1.84993	2.57251	1.95887	2.88835			1.99322	2.14966			1.90313				1.74028	1.96754
uri	4.74249	2.22849			2.27674		1.54697	1.96768		4.62787	2.67617		3.17306	5.28323			2.12069		1.74361
vret	1.65776	2.40696	2.63747	2.31139		1.78096			2.01084	1.57672	1.95054						1.7553		1.78478	1.80684
XRCC1	5.03388	2.71326	3.01702				3.50463	1.81571	1.64134	3.34092	2.56376		3.19144	4.05946					1.7749
Zasp52	2.05049	2.08991	3.30893	2.25269	1.82642	2.90741			4.8328	1.71719	2.7724				5.43707				1.75217
Aats-cys	1.77779	3.10338	1.94087						2.06355	1.69527	2.21292		1.56753	2.89022					2.38797	1.97334
Aats-glupro	2.1228	2.15459				2.30652			1.77537	1.75471	3.11562			1.69583			2.19774		2.24236	2.14813
Acn	8.32628		3.73322				1.97878	1.73556		4.28831	2.56719		5.86845	2.85221					1.79515	1.99713
Aos1	3.52155	2.06069	1.76387			1.60689	4.81086			3.5661	1.69469			2.34975			2.11916		1.60514
Ars2	6.7317	1.82227	3.19742					1.64832		3.65381	2.79014		2.28593	3.05456			1.85126		2.9018
asparagine-synthetase	2.11701	1.58276				1.66144	2.59422	1.60517	1.73136	2.38785	2.26982							1.52205	1.84777
ATPsyn-d	5.80491	1.50776	1.66493				3.31989		2.05711	2.6061	1.64416			5.11116			1.72465		2.11758
BubR1	1.67174	1.80478				4.20319	1.89788		2.24064	2.90023	3.31478						2.511		1.62766	1.60351
c(3)G	2.44714	1.98735	3.3713		1.80215		4.84434	2.65673		2.19491	1.92918			2.43174			2.43286
Cat		5.3299		2.41321		2.13957	1.8039		2.95493		1.73568				3.11816		1.92756		1.72722	1.76154
Cep97	3.38956	2.0993	2.20949				2.77947	2.40632	1.99452	3.98704	2.36913	2.3511					2.08095
CG10209	1.59649	2.04344	1.9887		3.58528		15.7704	1.60689	5.93282				2.68898	2.49357	4.05737
CG10341	1.67995		1.71613		1.81177	2.4087			4.19821		2.1249		1.96911	2.92648	5.03134		2.4257
CG10383		2.44405	1.85932		6.46872	1.8958				1.68895	1.95908			3.53669	1.75651				1.83817	1.67245
CG10737	1.63199	1.67395	6.43148	2.22035	2.52821	3.60178		1.80541	3.17912		1.63542				2.06595
CG1104	2.31226	1.95738	5.53564	5.03351	2.06557	3.16488				1.86076	1.70815			3.31007					2.4431
CG11148		1.52559		2.28624	2.00643	1.62935	3.4881	2.15591	1.88719		2.00172	3.23239		3.00695
CG11555	5.32364						2.05164	3.70767	2.17065	2.71297		2.4126	1.59508	4.11109			1.74809	1.80555
CG12082	2.32679	2.25426				1.61449			2.0454	2.42004	2.37931			2.13406			1.80519		2.12494	1.68913
CG12090	3.28667		7.96136	1.67244		3.5253		2.1194	1.74611	1.75165	2.3844					5.43684				2.8398
CG14894	4.22217	1.71839					2.58521	2.64775	2.71972	3.02871	1.79919		2.76669			1.56692		1.64828
CG14967		1.70534			2.41576	3.39412			2.27535	1.87415	2.60397		1.65522	1.90003			2.72936			1.61242
CG15014	2.08333	2.36414			14.2662		2.81088	3.21181	6.66424		1.64372	1.73889	4.40811	3.10123
CG15478					1.67337	2.22905	2.09224	2.74123	3.91757	2.42508	1.89469	1.98755	2.50491	1.74041
CG15784	3.3197	2.43572				3.66511			2.77497	1.92546	1.89789	4.26036	1.65484	3.2044						1.77607
CG1646	6.1062		3.17502			1.80735				4.06262	2.52889		5.31579	2.41356			1.66437		2.39985	1.99288
CG17168	4.95965	1.94415	2.63745				2.24219	2.00232	2.78378	5.13706	2.62726		2.69668	3.8753
CG2889	1.69212	2.31763	4.30844	3.93391		2.25805					1.5441			2.16041	1.67521		1.85456		1.67873
CG31601	2.25445	2.07264	4.47691				5.75588	3.09472	1.99566			3.95331		1.9077	2.16211		1.78304
CG32452	2.09522	2.79625			1.87045	2.26161			2.24846		2.20057		1.92153	2.2988	3.81233		1.77007
CG32706	21.2828	1.85126					7.75646	12.2551		5.98708	4.35334	3.70795	16.3095	9.6689					4.48884
CG34376		1.7121	1.951		3.42155	1.60001		1.89334	3.50342		1.97752	1.60967			1.86426	3.87039
CG3760	4.63345	1.75492	2.79376		1.87001		3.68507			3.10335	1.69036		2.15141	2.19443	1.74761
CG42671	2.23944		2.05452			1.59284		1.81838	1.91641	2.05527	2.10076	2.10613	2.41737	1.61284
CG4853		2.18753			4.01819	1.77839	2.46742	1.84287			1.94369	3.20462		1.5701	3.37325		2.20733
CG5205	2.1751	2.23367				2.76587			1.57357	1.96535	2.45345					1.86396	2.16239		1.88712	1.98104
CG5706	2.11639	2.49801	2.34972			1.66857		1.71697	2.26583	1.80977	1.68201	2.37639					2.50142
CG5815	4.53664	2.26062	2.19409	1.90254			1.77123			3.30043	2.36913		3.04058	2.95057					3.80352
CG6115	2.37573	1.90167					2.86045	5.74182		2.15011	1.81758	2.57069	4.3243	1.82388				1.57202
CG6455	2.46986	1.70629	1.90212				1.96312			1.77515	2.09705		3.21141	1.79165			1.9305		1.82245
CG6695	4.74676	1.75693	3.05392			2.62207				4.49122	2.47225		4.77516	2.38028			1.70038			1.73695
CG6845	16.8649		29.1346			7.43135		5.72758		2.35341	2.7458		2.16486					2.34274	2.75335	6.76
CG6999	19.7896	1.63009					5.90689	9.72183		5.93756		3.17019	11.2751	13.0648			1.86469	2.01032
CG7054	2.51964	2.62429	1.83798			2.1572	2.33507	1.63646	2.18937	4.69046	1.82402							1.67018
CG7110	2.70228	1.97639	2.40416	3.90003			1.96896		1.56872	2.8117	2.11135			1.72418			2.06001
CG7115	2.73824	2.11531	2.56875		7.49161		2.3401	3	3.91691		2.71679	1.77263	1.90232
CG7185	2.12407	2.03232	1.77983						1.85662	1.66363	2.12798		1.66231	1.61391					1.53225	1.61613
CG7261		2.36704	1.72817	2.11348		3.25015			1.95981	1.79756	2.96421						2.40007		2.17601	2.00759
CG7927	3.81181	2.78066	1.94495			1.79116	1.89554				2.21883		2.16761	4.49141			1.72814		2.13843
CG8003	3.33222	2.42061					2.82906	2.4418	2.09516	4.17977	1.79531	1.70794	1.62429	2.27268
CG8108	21.4197		4.56748					2.71206	2.72757	7.65583	5.21517		7.61218	6.9378					6.49601	2.8503
CG8206	2.74394	2.21018			2.89298	1.62403	1.58672		3.56133	2.17745			1.53263		2.08677				1.73743
CG8435	3.81048	2.19872						2.81917	2.8279	4.70922	2.71936		2.92277	8.24314			2.14634	2.31454
CG8920	2.89677	1.76715	3.10066			1.6987			2.27438	2.24217	1.77513			2.54811	1.81755					1.91885
CG9776	3.77478	1.77728	2.07509			2.43223				2.36619	2.70764		1.55617	2.91482					1.60583	1.91969
CG9951	2.37521	2.54848			3.22225				2.60451	3.27662	2.069		1.88465	3.08142	2.49945		1.94593
CR42862	27.4699		21.5767	1.58871		3.59592		6.40797		5.73829				1.77304		2.82524			3.22118	11.1325
CR43651	2.17785				64.7929	2.90937	13.2666	12.4664	2.94083	3.30566	2.96304		4.6159					7.4978
crc		3.87093		4.18828	8.96714	1.97294	4.61031	3.34437	3.05495	1.67437		2.66047		2.11011
csul	1.60996	2.1691			4.82709	2.31984		2.11446	3.1856		2.29339	2.55085			2.25442		2.67835
D1	6.1269	1.7108					1.97373	3.31446	2.37795	3.63257	3.15876	1.98237	3.21083	4.60599
del		1.53178				2.08662	3.10967	2.38747	1.75434	2.13131	1.89107			2.07727	2.01928		1.98167
deltaCOP	1.97754	2.09789	1.77634			2.80763	1.99893				1.59953	1.85489	2.20548	1.80844					1.72728
dikar	1.8935		2.27734		3.07481				2.84914		1.86769		2.31775	2.07841	2.32438	2.63572				2.24603
dlg1			2.06747	6.12548	4.62687		1.78835	2.73098	1.9894			2.458	1.97953	2.07103	1.61239
DMAP1	3.26857	2.03791	1.68331			1.80075			1.62357	2.55852	1.93042		2.04707	2.91007					1.55135
Drp1	1.65373	2.22384	3.56564		2.56826	1.71815			2.95348		2.20086						1.86578		1.57947	1.69547
eIF3-S8	2.814	2.08857				1.56235			2.64448	1.85447	2.12839		2.16764	1.62196			1.79354			1.53107
eIF3-S9		1.65046			3.07549	2.07316			3.44722	1.68003	2.01905	1.59126		2.2678	5.28343		2.44689
Eps-15	2.40873		2.43413			2.97913			1.68432	1.62181	2.04813			2.58846	8.12376	1.63902				1.76131
Galphas	3.23218	2.14856	3.09284				2.09692	3.46336		3.47568	1.61427	5.42758		1.7425			1.64794
gammaTub23C		2.74517		2.2651	18.423	2.16198	1.99517	1.65195	2.44133			3.16608			1.60671		1.97588
Gen	3.32863	2.27979	1.92941			2.71151	2.52033		2.01233	3.45994	2.61535			2.51205			2.19168
gfzf	1.54066	1.80562		1.68594		1.64251	2.04965	1.74238	2.43688		2.41871	1.91314		1.85319
Gnf1	6.1549	1.57154				2.013	1.9809			7.14049	2.9911		3.12923	2.80952			1.62188		3.75685
Hsf	2.41803	2.30456	2.52078			2.09478			1.68127	2.53674	1.81615		2.0572	1.79748		3.38593
Ide	1.9299	2.89956	4.32222			1.82228				1.76373	2.28146			1.62411			1.72372		1.74994	2.53463
l(1)G0148	1.68402	2.28019	2.03836		2.15363			1.86015	2.35561	1.76215	2.02849				2.10328		1.70156
l(1)G0222	2.36156	2.33052	3.44586			2.47494			1.83217	2.44221	2.75649			1.76521			2.22897			1.9437
ligatin	3.82347	1.73512	1.64298		1.94508					3.28367	1.76446		1.93512	4.47935	2.11106		1.87627
maf-S	9.06255	3.32938					5.20262	7.03451		3.11635		4.23071	5.23927	5.36023	1.58637			3.55104
mars	2.07839			1.65099	1.57923	1.63395			1.86537	2.67482	1.92075		1.90522		1.62447				1.79966
Mhcl	1.71572			4.34313	4.30302			1.62472		2.02308	1.87793	3.40724	1.55372		2.00323	2.48536
mim	1.89736		3.56299	2.99362	5.94378	2.80151			3.01126		2.2766			2.02797	2.62862					1.87542
MRG15	3.51097	2.7098	2.36615			1.53701	29.4422		2.61125	3.26238	2.04924	1.94207		2.79338
mth		2.05761	3.4527		5.64519	7.15184	1.79094	2.01478	2.27787			2.35984			2.56424		1.68486
Nacalpha	3.16465	2.41818						1.99461	1.79081	2.64414	1.64834	2.22164		2.18048			2.21975		1.53453
Ndc80	3.64585	1.70274	1.68272			1.5855			2.15858	4.06342	2.73232		2.41463	2.57562			1.91595
Ns1	7.21909		1.76902				6.51095	1.82287		5.83729	3.54243		3.29412	12.5831			1.6886		2.08355
Ns4	4.99262	2.43141	2.86837			2.24956			1.7423	3.4992	2.55203		2.97419	3.93858	1.98517
Nup50	1.72388	1.60638				2.22717			2.63972	2.15061	2.50757		1.75642	5.73094			2.2054		2.94341
Pde11	2.27681		4.8613		17.1612	1.66618	2.22003	2.49698	1.88098		1.62324					3.30164				2.61928
Pdi	1.85935	2.74392	1.87544		1.75136				2.86481	1.69423		1.89695		1.785	1.75783		2.54704
Pms2	4.98005	1.86557	5.0729	2.53981		2.79924				2.62232	1.85409			2.22606		2.11652			2.10279
Prosalpha6	2.0529	2.59489	1.78919		1.94859		2.58359			2.4746	2.27924						2.17277	1.94695	1.58527
Prp31	7.36585	3.18336	2.20296				3.14504			3.18688	2.50148		3.0837	3.43763			1.6907		2.14958
qkr54B	1.93095	1.89657	2.60177		2.1505		1.85189	2.12918	1.54873	1.87364					3.06939	2.00995
Rab3-GAP	2.1674	2.65392	2.46817			2.88036			2.27705	1.71227	3.14866						2.59218		2.2483	2.00182
RanGAP	6.29147	2.03041	3.61489			2.79496			2.11001	3.62839	2.48322		2.86173	2.31354					1.91901
Rel	1.92184	2.0318				1.80885			1.91475	2.21956	2.86574			2.10185			2.10398		1.64571	1.63014
Rpp30	6.33029	2.43949	4.32643				13.626	6.08146		3.84486		2.15447	2.47314				3.51956	2.48987
RpS3	3.27481	2.42861	1.60013		2.57317		2.03507	6.52613	2.82517			5.37539		2.91364			2.78243
Rpt1	1.75394	3.37417			1.96549		2.73403		2.55778	2.06181	2.1276			2.1575					1.57559	1.56477
Rpt6	2.45834	1.88089					1.67522	1.82139		2.37168	2.36266	1.79704	2.03149	2.67509				1.82609
sba			2.52727	2.04484	4.54065	1.57602	2.3015	1.98302	3.44768				1.60749			2.70541				1.90906
scra	4.38584		1.76083	6.00743		2.24769			1.79434	2.75637	2.47467		1.64458						1.84506	1.60246
sds22	3.00365	2.60612					2.21351	2.44009		3.25164		3.66499	1.72641	2.18673			1.81516	1.64193
Sec16	1.84674		1.83924	2.7059		2.77963			3.09101	2.02952	2.46282				3.05251	1.72086				1.96805
Sec23		2.58451	2.68225			4.78496	2.63557		2.82369		2.44885			1.91454	2.37153		2.17704			1.88439
Sec31		2.04085	2.43019			4.04894			4.26642		2.89202			1.76385	4.30287		2.22275		1.7117	2.21939
SF1	4.20675	2.16755	3.09576			3.05068			2.0334	2.89596	3.17483		2.59605	1.87211						1.6408
shi		1.68097	2.30853			2.08541	3.35018				2.03561	3.15042	1.66396			2.35147			1.64764	1.57352
sip2	2.955	1.65056			1.58819	1.67562	1.76763		1.67919	4.39176	2.24191		1.98597				1.69535
Tao	2.99743		1.62495		2.36009			2.53059	1.54376	2.1303	1.60248	2.4309	2.13626	2.17655
Tep2	1.66493		2.57198			4.39286	2.47524		1.68537		2.54429		1.83672				2.92142		1.71309	1.69567
TppII	1.86373	2.13843	2.53871			3.09358					2.68984		1.94456	1.7824			2.39459		1.7509	2.07206
trbl	1.66956		2.26337	2.85043	4.30845	1.58855	1.57709	2.15927	2.09793			2.25727			1.58591
tud	1.76311	1.54074		2.10404		2.09014	1.79313			1.80984	2.25759			1.92921					1.51265	2.06223
woc	3.53423		1.81943			1.58038			1.69078	2.87407	2.68742		3.49794	1.59087					1.73018	1.72364
Xpac	10.2465	2.95168		2.64			3.09943		2.3491	4.9501	2.72676		3.3885	3.59476				1.96923
ZAP3	4.14106		1.86982						2.03331	2.75897	2.35424		2.03777	2.88971		1.84515			1.61113	1.82478
Aats-arg		2.42804	1.57336		6.42432	1.9208	9.40698		1.72348		2.29992						1.78576		1.83132
Aats-gln	2.53686	2.03119							2.33424	2.98015	2.62237		2.12879				2.47503		1.60013	1.71298
Act5C		3.6958	4.63055	2.96168	8.7124		1.86957		1.61199						2.54572			1.75394	1.52743
Actn	2.43644	2.09808	2.21789			1.67769		2.24247	3.3502	2.49482	1.70021	3.55432
Akap200	3.47011	1.92783			4.62313			2.79459		3.56373	2.35267		3.41257	3.74443	2.74781
ALiX	1.66466	2.64913	1.91134		1.6877	2.59122				1.71549	2.39614				2.00966		1.66765
alphaTub84D		2.39623				2.92839	2.00176		1.66962		1.88089	2.57262		2.41545	2.26438		1.70963
AMPdeam	2.32785	2.55228	5.49303	5.52671		2.8516		1.75366	2.00835		2.01517									2.4049
ApepP	1.90044	2.39424		2.0529		3.36196			2.61933	2.02165	1.85074	1.54587							2.20201
APP-BP1	3.572	2.87727	5.46265			1.6834	3.16937			3.05967	1.56435		3.00969	3.53103
arm	2.93126	2.74988			3.4391	3.21354			3.07909	2.01553	2.21367				2.48716		2.03226
Atu	2.72423					1.78195			1.91375	2.28485	2.59013		3.25899	3.21781			1.53796		2.22935
aux			1.81989	1.73716	2.53518	3.56543			2.08729		1.74284				3.27295	1.87876	1.76795
beta'COP	1.62525	2.048				1.7141				1.90135	2.54329			1.76494			2.077		1.57778	1.62597
bl	2.88972	1.67695					5.59498	1.75127	2.13307	2.51992	1.71598		2.11265	1.75544
bsf	2.61798					2.14936				2.56275	2.8892		2.76553	1.74005			2.27597		1.78567	1.66175
Bub1	1.76798	1.6007				2.04852			2.79329		2.21624		1.90926	2.25657	3.29906					1.54463
by	2.01423			1.98408	1.73825	1.69634	2.32256		2.03815	1.81385	1.80425				2.03072
CalpA	2.56086	2.09096	4.24086			2.9589				2.27691	2.24288		1.69064	1.80166		1.63774
Capr	2.33113	1.83404			2.69195				4.34087	2.43221	1.71077	2.39516	2.34824		2.08028
Cctgamma		2.6649	1.81366				1.70216	2.49773	1.66202		2.24301	3.40116		1.5877					1.6179
CD98hc	2.2178	1.78747	3.17477	1.87263				1.53089	1.534	1.73113		1.87498							1.64512
Ced-12	2.1324	3.51047			2.38215	1.61565			1.94917	2.89019	2.35117	2.26338							1.64972
CG10306	2.53823				3.46416		2.10145	2.40982	3.72883	2.33942		3.36106		2.26754				2.26706
CG10340	4.01105	1.50881						1.78758		5.28831	1.82987	1.69623	2.18241	2.75628				2.03394
CG10565	7.55869						1.89683			6.41211	2.74655		4.51239	2.15747			2.02505		2.02318	1.60777
CG10754	1.87239	3.39032				2.22443	2.00875	4.32457	2.45723			4.16211		6.40974			2.65132
CG10907	1.91597	1.72095	2.69394				2.96448	3.63603		2.78657	1.71393	2.31477	3.92936
CG11190	2.36907	1.78345					1.73113	10.7526	1.91889	3.20486	2.24207	12.7675	1.69395
CG11334	1.80719	2.24298					1.60442			1.71053			1.90397	2.4384	1.73749		1.70971		1.58788
CG1142	5.37032						1.7051	4.51778	1.7682	2.9546		4.17503	2.37392	4.52053				1.63256
CG11858	10.5466							2.14724	2.00166	8.44514	2.78682		6.20637	5.89056				4.43823	4.40783
CG11927	2.71582	2.50848				1.52317			3.3335	2.9868	1.80108		1.95313	2.05904	1.9943
CG12128	2.42134			1.98291	3.29188				1.62492	2.51921	1.85733		2.78332			2.87009			1.69227
CG12204	9.36306		1.78721				1.95601		1.59261	9.21364	3.01428		8.99308	5.17872					2.87601
CG12272		2.73243				2.37402		2.39312	1.86091		2.0696	3.34047				2.89849	2.95172			1.84102
CG12822	5.83966	1.56876	4.82492		3.21442	1.71064				2.75356	1.65412		2.21686						1.85977
CG13298	3.15993	2.01706			210.286	1.86235	2.84922		2.08198	2.28536				1.61936				1.59382
CG13784	1.90381				4.54238		2.57966	6.06398	2.08076		1.60123	3.98664		1.73039		1.66881
CG14683	17.5571	1.77151	2.05975						1.66308	5.59497	2.1904		9.92617	8.07517			1.91124
CG15099	1.58702	1.59836	1.89958			2.3548			1.65525		2.50883					1.61407			1.51083	2.05807
CG1518	1.77368	1.7202	2.32871	27.8262	3.3578	6.24938			2.87623						2.17691		1.76
CG16742	2.49767	2.30931	1.60912			3.70958	2.89979		2.24092		2.16884			2.43261	3.14637
CG16935	1.78157	2.58811				1.72927				4.09644	1.65857	3.10957	1.97927				1.55102	1.85413
CG1785	10.236		1.99693						2.5467	5.93656	3.40805		2.59155	7.05785					1.82778	1.53821
CG18004	2.02633	1.92687					2.10814	2.88162	1.69665		1.71002	3.5606		1.93702			1.70877
CG18809	1.8705	1.93159	2.04475	2.23107	8.52841		1.82444		3.92998		2.26996				4.31447
CG2469	2.94535		1.60806			1.76464				2.684	2.8191		3.01853	2.16762			1.98455			1.57283
CG2698	2.12531	1.91489	11.3562	1.66555	3.28769	5.30301		2.2504							2.11173					2.73536
CG2970	2.57742	2.57306	5.05513			1.55216		1.95022	2.82045	2.99261	2.63916		2.22966
CG30015	1.61786		2.09313	2.73773		2.07419		1.64898	1.7587		2.03865	2.05528			2.10843
CG30118	2.59322	2.32762	4.99981			2.65932	2.39158		2.8022	1.70879	1.84473				2.64907
CG31908		2.02718		4.18681	2.95197			2.28825	4.73307		1.61891	1.71003	2.26564	4.94017
CG32687	1.63866	2.24498	1.61705	1.79678	8.22123		2.73115				1.69213				3.36238		1.88747
CG3294	8.72027	3.48824	10.384		32.5674			3.90469	5.44095				10.6265						3.2443	3.16234
CG34126	2.0885		6.43518	3.71202		3.36266		2.4859			1.82407	1.86067				2.2014				1.8705
CG3530	1.73216	2.62825	3.71403			1.75419			3.61942		2.44237			1.952			2.15756			1.82817
CG3542	5.26801	2.43263					2.04803			3.62188	3.05343		2.86053	3.32977			1.88304		2.04723
CG3635		1.92175	2.08254		2.70859	2.28251	2.22416	2.67914				2.10168			2.05251	1.98441
CG4603		3.94033			3.63174		6.30685	2.0944	2.02196	1.87343	1.59176	2.11002			4.03794
CG4825					2.10712		2.0958	2.92116	3.32909		1.5554	3.76686		1.87074		1.5861	1.67008
CG4887	6.0284		5.3374					3.17114		3.54035	2.43976		2.95725	2.11649					2.17525	1.99625
CG5118	2.02973	2.28928	3.08447						2.03707	2.37737	1.65862				2.05508		1.56495		1.51434
CG5168		3.13607	3.3897		3.72438		1.77312	1.67341	2.8302		1.56791	2.26831					1.66917
CG5604	2.04212					2.60184			1.89182	1.99827	3.27097		1.62871	2.10523					1.60562	2.07482
CG5641	1.93778	2.62907			8.60598	6.82476	12.7445		1.59052		1.84264				3.13397		1.58805
CG5703	3.94363								3.62696	3.97525	2.12189		1.69036	1.95299			2.08666	2.2975	2.2129
CG5787	2.62644					1.55739		2.45187	1.87673	3.23777	2.64862		1.6433	1.72796					1.61486
CG6066	5.15129	1.93588					3.72389	1.58575		3.20291	3.27479		3.79071	10.612					2.79963
CG6701		2.0759	2.90111		1.73783	2.06373	2.31489	2.38896	2.2233			2.84648								1.85577
CG6923	1.99868		2.27814		10.1711	4.2543			2.65724		2.36901	1.60538			5.2686					1.81088
CG7065	2.76249					1.7104		1.7978	1.73894	1.71477	2.47321		2.06497	2.49758					2.28791
CG7265	3.40802	1.99936	2.53186			2.51624		1.68861	1.65305	2.98809							1.84064		1.95313
CG7338	2.96957		1.67193			1.72407				1.99227	2.54232		4.09581	1.83886			1.78528		1.97032
CG7747	3.44483	2.14979	2.26012		3.14227				1.75086	4.59993	2.20451		2.78172	4.14746
CG7824	2.42303	1.73207			2.23516		5.80307	2.12033		3.04226	1.68095			4.69282					2.49829
CG8060	1.69286	1.877	3.05256			1.87344	1.53126		2.04379		1.77674					2.11908	1.86087
CG8405	1.80389		1.65923		2.41854				2.16448	2.31331	1.88803		3.30446	1.58313	1.9898
CG8728		3.37274	2.21598			1.87387	2.68207	1.74175			1.84119	1.88746					2.03296		1.59697
CG8949	4.01224						1.72909	3.03385	1.51479	2.37548	1.64865		3.92859	1.87276						1.78708
CG9346	3.33613	2.41655	7.03174			1.67572			2.24989		3.38878		1.69968	3.48193					2.34789
cher	1.96613		1.61844	3.2261		2.85692			2.11761	1.59786	2.19084								1.91599	2.03648
CHORD	1.67048	3.59676	2.45705				1.74772	2.44902			1.53903	2.0391		2.01789					1.74314
CkIIbeta		1.71286	1.71373	1.7089	1.69016		2.06429	5.43131				3.62363		2.02237	2.25362
Clbn	4.51482	2.12943					3.00009	2.00746		4.55856	3.09539		1.99493	3.51321					3.50024
cora	2.38714		1.76507			1.82833				2.10846	2.42071		1.96439	1.63039					2.00322	1.74369
CR44206	8.27652		5.24657	2.89015	10.8192	3.27359	3.33773			3.77505			3.80448					2.41666
CR45334		1.76975			8.50024	2.0641	2.81597	1.89509	3.25581			3.00741		2.45721	3.0609
Dif			3.05785		2.97671	1.69465		3.12239	1.97257	1.61146		2.28831			1.67452	2.07351
DNA-ligI	2.2044	1.73597	2.00371				4.34803		1.65329	1.96216	2.5191		1.57835				2.36427
dos	1.54549	1.70336	2.33591		3.54539	1.79316		1.63149	1.89885		1.76396	2.07787
dpa				1.87238	24.6567	2.98046	2.65458		2.00619		1.72386			1.5735			1.59452		1.64074
DppIII	1.59385	3.74177				2.24882			2.52892		2.03856			1.86929	1.90059		1.6833			1.9728
EF2		1.71914	1.63018		2.01448	1.8983					1.97395			2.46848	1.94467		2.86942			1.73667
eIF-3p66	2.27975		1.9453						3.69872	2.22262	2.57094		2.02726	2.71048			1.90413		2.66434
eIF5	1.70595	3.30009	1.71271				3.51767	2.03188		1.93562	1.65943	3.42234		2.75454
enok	2.2072					2.43461			2.63595	1.76651	2.96242			2.22418	2.13322				1.89187	1.96554
FKBP59	2.56707	2.28254	2.62369					2.12653		2.87641	2.28533		3.07667	2.14096					2.09214
foi			2.05393	6.00512	2.24507	2.49032			1.86114			1.73095			1.63783	3.0775				1.55124
Galt		1.65895	2.49329			3.00507			2.4548	1.55834	1.62002				2.00479	1.80018	1.54196
gek	2.406	2.12686							1.83574	2.32669	2.6275		1.87417	1.65668					1.55451	1.88684
Gga	2.32572	2.46937	1.80081						1.94463	1.93065	1.79661						1.76968		1.6113	1.54447
gig		1.72414	2.49357		2.34115	3.14739			2.07166		2.09657				1.75923		2.00305			1.77699
Gl	3.14917	2.39786				1.72393				3.04597	2.44013		2.20205	2.23437					2.19339	1.61678
glo	4.06903		3.26179	1.61723	1.95471			1.83144	1.86205	2.89668	1.91761		3.05523
glu	8.21773							1.94638		7.35342	3.19722		4.69446	3.73124			2.55887		3.94654	1.68203
gpp	1.85136			2.3436	4.40243				2.34337		1.65177	2.71653	1.88728		2.05794	1.68471
GstE6	2.02767	3.82332		1.60645		1.96767				1.93129	1.80511			2.41931			2.87142	2.45603
GstO2		1.79169	2.14242		1.94338	2.09116	3.4009	1.65171	1.73614			5.43629					1.74746
hep	1.5874		1.87241	2.20073	2.04978			4.94689	2.42726		1.78036	3.83449			2.93332
Incenp	7.73974		1.66272						2.43111	4.11871	3.51573		2.58737	4.25333			2.01113		2.22031
Ino80	5.99811		2.97882			2.10862	1.54608			3.96098	2.98202		2.84708	2.39557					2.11808
Irc	2.04869	3.03118	4.06979			2.01332	3.28737			1.78719	2.59297						1.70025			1.93062
jar	3.47116		2.86298						1.74218	3.10312	2.34436		1.57966	1.61799					1.79127	1.66872
jnj	4.04261	1.87003	3.17866			1.87015	2.54134			3.05647			2.4522	2.5609					1.67683
Kebab		2.40408	2.70886	4.83582		2.1489	3.89949	2.51663		2.52209		2.7646			3.20147
kst	4.24276					2.47162			2.05613	3.26642	3.37639		3.23504	2.23839					2.77312	2.91531
l(2)35Df					1.93752	2.11928	1.56686		1.82224	1.88068	2.06885			1.84682			2.43251			1.55434
l(3)07882	6.94643				2.04803	2.04756	2.03656			5.15089	3.52556		3.03848	2.68419					1.78725
l(3)72Ab	2.55321	1.65197				2.8994				2.30085	2.68788		2.31936				2.13477		1.75756	2.009
lds	2.02708	1.99714		14.4293		2.01454				2.10923	2.45415			1.95376					1.86385	1.56906
Letm1	2.43801	2.05294	2.02267							2.46871	2.16054		1.64562	2.0154					1.90535	2.25814
M1BP	2.0571	2.17292	1.92342					2.54231			1.99255	2.94399	1.75485				1.73017		2.08254
mael	1.83107	2.06008			1.80072	2.28725	1.67055	1.60625	2.37589		2.39348				2.74474
mbm	5.82711						1.88965	1.95006	1.90484	3.38958	2.38204		2.19657	4.21542			1.62245
Mcm3	2.05535			2.02529	17.7301	1.62026			1.77923	1.82348	2.1533						1.75149		1.9589
Mec2	1.85495			6.44797	7.1959	1.52365			2.67787	2.07218	1.69833		1.85836				1.63635
Mi-2	8.17928	1.71911				4.28517				5.06406	3.99451		4.38939	6.16107					2.28177	2.36739
mop		2.5147				3.592			4.64792		2.77672		2.00443	1.78292	3.80047				1.67844	1.97255
mr	3.29771	2.42282	4.43459				1.89262	1.63915		1.86348	1.61021						2.55714			1.66932
mRpL9	3.53431	2.16863					3.5917		2.07695	2.87654	2.38413				2.07475		3.0034		3.02244
mRpS7		2.16359		5.98922	1.55509		4.82232	2.48078	1.89372			2.24455		2.13409				2.02393
mura			2.25902	1.74396	11.6823	2.60053		1.72361	3.75693			3.01659			14.8763	4.14172
Nab2	2.82469	1.91508			1.89163	1.68904				2.29988	2.58307			2.4582					1.62641	1.57382
ncd	3.06841				1.62241				3.14933	2.78206	2.22357		1.70717	2.2779			1.75709		1.69812
nonA-l	3.94108				9.98473		2.41524	3.52763		4.05344	1.56839	1.73565	2.87146			1.7367
Ntf-2		1.75942		4.97052		1.9095	1.5974	1.98804	2.88791			1.58226		1.60158				1.75522
Opa1	2.77832	1.72221	3.66208							2.00981	1.90622		2.47973	2.18598					1.62301	1.85141
Pax	2.19517		3.23558			2.24305	1.70588		2.01667	1.99623	1.6606	1.6303			7.79994
Pde8	3.21227		4.91795		2.31983	2.37199		2.44072	2.29041		1.95615				2.11034					2.04655
pea	4.36096					1.68302				3.27695	3.04878		2.88276	2.82439			1.92137		2.1723	1.69068
Pfk		6.11596	2.62286			3.58169		1.75471	1.70833		2.79137			1.59682		1.86959				2.71143
pic	2.08577	1.85516				1.82662	2.59197			2.33466	2.49358						1.88234		1.57012	1.68908
PIG-S	2.03821		2.62663		32.1077	3.31599	3.09226		5.598	3.37454	2.68996						1.56817
polybromo	2.58573					3.07259			2.00541	2.64684	3.37128			1.98388			2.63915		1.81543	1.90333
pont	2.18944						1.97163		2.00702	2.16336	2.26078		1.99864	3.36039			1.66605		1.64234
Prosalpha4	5.67911	2.8438	1.62833						1.66461	3.43884	1.90485		2.42924	2.06435					4.24776
Prpk	2.06024	1.78799			2.39988		3.74861	2.14885	2.49108	3.67195	2.05385						2.09095
Rad17	1.63777	2.56361	2.37345	1.70819				2.09507		1.74594	1.83335	3.35363					1.61899
Rbpn-5	5.1086	1.94165	2.52495					1.79858		4.02204	2.42772		3.93169	3.16939					2.1799
Rme-8	1.64352	1.7546	2.79885			2.62152				1.68472	2.41595						2.29257		1.60194	1.93848
RpL21		2.02159				1.53625	2.25535	2.3137	1.78555	2.08096		1.7359	2.26287	4.59251
RpLP0	2.12469		2.40603		4.84456	1.74031			9.743	1.68562	1.61539				4.25503				1.63138
Rpn1	3.31713	3.05465				2.06933				2.49893	2.61682	1.54407	1.62109	2.17456						2.20847
Rpn13	3.29054	2.1429	4.69248			1.81327			2.09908		1.77507		1.51904	2.86247					1.76339
Rpt2	2.9422	2.53171							1.85892	1.70177	2.01485	1.65838	2.21453	4.92596						1.54609
Rpt3	3.39787	1.92726							2.02911	2.59317	1.60264	2.36545	1.70657	1.83674	1.9791
Sara	2.06476	2.04859	2.31493	1.90725		2.88582				2.06902	1.89043								1.76986	1.95834
sav	1.56987	2.04904			2.33825	1.83503			4.65716		2.18565			1.70219	6.98727		1.73443
SCOT	1.7571	1.65842	1.91253		2.21513				1.68532	1.8168	1.56768		1.69074				1.60789
scrib	1.70639		2.17362		3.04433	2.42235			2.0257		1.81335				1.92601	1.55739				1.80958
Sec6	1.70807	2.16249			1.95376	2.56365			2.49633	1.71381	1.95846		1.67597						1.80576
shot	2.27131		1.54903			2.3146		2.71451		2.14836	2.2346	2.49247							2.04395	2.02699
Spt5	3.34434		2.81082			1.55709				4.29079	3.32783		2.50423	3.45774					1.73652	1.92011
Srp68	2.83315	2.56625	1.83288			1.7175			1.66377	2.26549	1.96545			1.79869			1.92457
stmA	1.61265	2.61854	5.0283		3.54349				3.07961		2.12473			1.74253			2.03181		1.59658
Tep4	2.02354	2.12022	2.00254			2.78645				2.18432	2.33498			1.66653					1.8166	2.48668
TfIIEalpha	2.98639	1.5934	2.10634			1.67728			1.68515	2.14139	1.61308		3.97656	1.8802
Top2	2.86525	1.52571				1.7738				2.6434	2.63128		4.13242	2.62225			1.86202		1.54387
tra	3.92996	3.40935	6.46212		1.66301	2.20788		4.57223	1.54411				2.70975					1.93663
Txl		2.64541			1.76214	1.84928		2.30741	3.30733			3.98224		2.29546			2.36268	1.66438
Ubc12	3.28956	2.6891	2.16869			1.64102	1.64258	1.94842	2.60266					3.34964	2.31597
Ubi-p5E	2.8581	2.43607	1.85662			2.19546	2.76465		2.66293	3.35877		3.06867	3.24785
Vps39	1.96618	2.24081	2.82112		8.35166	2.36492			1.81373		1.99959						2.04552			1.67107
26-29-p	1.8372	2.05583		6.02677		2.38781			1.66127		1.99597			3.17953			1.60702
Aatf	13.015	1.61702					1.90339			3.20276	1.9771		3.70639	3.9993					1.805
Aats-gly		3.12934			1.61039	2.34769			2.68645		2.62837			2.39307			1.91842		2.42144
AnxB10	7.0162		2.64489			2.05137				4.55812	1.7736		2.71741	1.59153					1.89631
AP-1mu	1.65857	2.49305			3.15708				2.0047	2.22703	1.59201	2.23094							1.59276
Apoltp	2.20382		1.86172			3.67612			2.34289	2.04541	3.08201								1.96021	2.44071
ATPCL		2.52929	1.86404	1.71913		2.13362					2.0754			1.54534	2.01098					1.84554
Bacc	2.31007			1.93582			2.5469	11.9461		1.75327		5.51589	3.34924	1.89101
bocksbeutel		3.11949			2.31325	1.78281	2.38131		3.23635	1.624		1.79882			1.83423
bor	3.09831	1.57998	2.40449							2.80944	1.9062		2.33208	3.76829					1.99854
BRWD3	2.43869		1.95379			1.71904			1.7184	1.86483	2.2106				2.87637					1.97132
BTBD9	2.25513	1.96422	2.04486	2.43352	2.33983	1.8143					2.17234				7.93877
Bx42	5.50895	1.84007			17.152				2.10724	4.42987	2.54648		5.18008	1.54373
c11.1	1.98309	2.35057	2.17532	2.5463		2.40884					2.29898	1.57769								2.48881
Cand1		2.03844	1.89445			2.3734			2.40035		2.06359						1.79037		1.58063	1.71355
CG10063	3.41676	1.9808					5.43112	4.25834		5.25667		2.03627	3.31255			8.29254
CG10289	2.01026	1.61443	3.0234				2.10272	1.80682			1.55914			2.07939		2.41799
CG10467		2.75746				1.7907	1.99956	1.65713	2.85382			1.92168					1.76778	1.77098
CG10688	3.26914	2.16171					3.82403			3.0302	1.60882	1.79012	3.06511					1.89112
CG10732	2.80906		1.75521		2.00263	1.77024			3.09775	2.42643	2.43849		1.61404
CG10863	1.60244	1.5638	2.2024						2.52692	1.95182				4.75281	1.83718			1.66492
CG10973	1.75348	4.22119	6.82888				3.41122	2.76247				1.79686		2.14878				2.08556
CG11122	2.12226				2.77512	1.6493			1.79033	1.54362	1.77463		1.96335							1.74934
CG1116		2.50913	2.94953		2.22473	2.33186		1.75615				2.51678			2.4834		1.87075
CG11414		2.25772	1.61768			1.93985			1.7966		1.76946				2.81184		2.18575			1.65571
CG11700	2.93993	2.36708	2.61204				2.38162		2.27006	2.75647		2.54844	2.58498
CG11710	3.71484	2.47926	3.10023	2.70795						3.04624	1.79087	1.83667	2.57881
CG11873	1.82179					1.57208			3.31655		1.76551		2.01441		4.2452	2.41416				2.6172
CG11880		2.50591	1.73734	2.93645	5.3374	3.17771					1.90514				1.69897		1.78328
CG12499	1.58627					3.20363	1.67785		1.54522	1.57839	2.03822			1.57092			2.32985
CG12942	2.37035	2.41722	2.86505				2.37031	2.05356	1.53924	1.58836							1.63922
CG13197	2.61357	2.10452	4.91032				2.31167	2.39135	1.72391	1.73917									1.83513
CG13563	2.98235		5.24792			3.73683		2.11907			1.72363		1.83947			1.76717				1.92816
CG13605	1.86187	2.35203	5.527			6.24955			2.523		1.86442				1.62919		1.94306
CG13889	9.95909		9.39865			2.82728				6.1357	3.39535		7.15585						4.10029	4.5304
CG13893	2.87095	3.47417	10.8478				2.9613	2.67102				1.94084				4.0588				2.33661
CG13993	6.70319						2.14307	2.14881		2.82724	1.7068		1.54488	5.70823				3.8034
CG14346	1.93462		5.2699			1.61129	5.35931	8.23241	1.95727			3.53788		2.44117
CG14527	2.61974					2.37391	2.71316		3.56089	2.68193	2.51645	2.13546					2.10573
CG15027	2.33995						3.18883	3.11545		2.66946		6.74719	2.70114	2.18116				5.19052
CG15196	3.36824	2.15504	4.91881		3.2404	2.1176		3.11126	2.3585							2.47827
CG16974	1.76066						1.92242	1.61343	1.52936	1.8327	2.03987	1.76076					2.15194
CG17002	2.24641	2.69914	2.25838				5.2498		3.91049			2.68791	1.67049		6.37224
CG1703	16.1053								1.6277	6.69947	4.27783		13.1243	11.0713					4.7102	2.1899
CG17360	1.5448	1.705	2.46838		1.86125				1.64487		1.83573	3.67112				2.4333
CG17982	4.21227	2.85719		5.81746			3.61619	2.29322						6.84808			3.4587	3.16218
CG18081	5.48167			1.67588			9.34395	5.09086				2.36079	3.07031	6.84503				2.8337
CG18522	2.00151	2.15988	2.45809			1.92433					2.23368	1.8049					1.71974			2.23745
CG18596		2.3595	1.78942			1.94645	1.66292	1.87196				2.96953					1.65432			1.58572
CG2025		2.39036			2.20487	4.02363			1.93989	2.0244	2.44615		1.79333	1.68119
CG2064	2.17579	2.39273	3.69741					2.81771		1.94295	1.63477	3.4424		2.38702
CG2182	5.70098	1.88764	2.06564							2.83603	2.17116		6.16957	5.51799			1.83917
CG2263	5.47782	2.12372							2.94863	9.48992	2.1911			2.63268			1.80827		2.39891
CG2685	5.28056			2.68829			1.94424			3.53779	2.98004		5.40263	3.41057					2.09142
CG2701	5.08127	1.95821	2.38803						1.67251	5.48145	2.61398		1.99039						2.49497
CG2818	2.1865	2.73721	2.40545	3.98516	10.6599	2.01578		1.80254			2.19181
CG30339		4.59469	3.69969			2.71714	1.97989	2.67633			1.98721		2.19224			2.919
CG30414		2.76524		6.2434	5.3532	2.27601	5.46849	2.02807	4.26682			3.01464
CG30423		3.2666			27.1516	5.62244		1.63185	4.26612			1.82973			4.64833			1.85301
CG30460			2.30732		1.77089	2.29604	2.33414	2.46079	2.28206			5.25766			2.16494
CG31098	1.75201	2.71285	3.06131				4.95932	1.97168	3.39159		1.9444		1.74126
CG31648		2.50858			2.77505			1.93475	4.31382			2.79172	2.44028	3.16819				2.33219
CG31705		3.18652			9.70655	3.59544			4.38951		2.67384				4.85926		1.75884			1.83201
CG32176	5.58743		2.06162							3.43207	1.71737		3.27132	3.54474					2.04261	1.6347
CG32809	2.88669		4.25792		2.5965				1.79901		2.3083				2.29093	2.07539				1.79457
CG33158	1.61735	1.76212	1.61402			2.18098				2.0488	1.95302								1.78894	1.71671
CG33970			8.42606	3.80647	2.77523	3.23855	14.3574	7.13876			2.5591					3.6405
CG34220			4.61349	3.48002	11.1966	6.02964		6.22556	8.69194					4.86429	256.494
CG34404	2.54117	2.67154	2.32169							2.56155	1.89058		1.91393	1.73222			2.00182
CG3967		2.33855	3.00534	2.00476	2.05559			2.28209	1.92009			2.33726		2.5933
CG4065	2.85663	1.95824	4.24296			2.0037			2.06576	1.64622	2.12809						2.18745
CG4069	5.12958						2.00318	1.87249	1.98358	5.0565	2.7756		2.94846	3.15288
CG4119	4.20263									3.83542	2.67858	2.02984	4.68341	2.21177					2.37492	1.55712
CG42724	5.05269		2.96452					2.21483		2.51074	1.61667		3.84179						1.75405	2.02807
CG43343	4.35943		2.32431				1.67425	1.79874		2.38089		3.12989	1.86089		2.12104
CG44245	12.2996	3.68698	25.8688	4.40854			4.58285	6.35131					3.90229		13.7302
CG4557	3.38806	2.53459	2.2941							2.69517	2.00948		2.56317	2.53599						2.06401
CG4622	3.96019	2.94981	3.57935						2.37138	2.68052	2.61114		3.31554	3.50035
CG4806	12.3245						5.76697	3.68718		9.36265	3.01025		7.25669	7.55645					3.98541
CG4820	2.80222	2.36941			5.33138		4.78243	2.88722	4.06143			1.78373		7.4261
CG5003		1.75287	1.81006		2.68161	1.91365			2.20474	1.65027	1.93876						1.63822
CG5080	2.48665	2.46832							2.40399	2.03048	2.24715		1.72781	2.54855					1.86353
CG5087		1.83538	1.83809		2.16368	2.01492			2.14645			2.27793			1.61568		2.04801
CG5290	1.84025	3.46651	3.9436					1.72563	1.91602		1.85139	1.91282		2.25313
CG5384	3.17238	2.35493	2.68533				2.05679			2.13034	2.14115		2.37709	2.21402
CG5516	1.53428					2.54247	1.96305		1.803				2.61958	4.0966	3.0603			1.84273
CG5645	10.1237						1.88878	7.16422		5.53048	2.3889		4.9305	4.44254					2.05655
CG5808	3.6172						1.97905	1.89116		3.01399	1.96274		1.95253	2.42374					1.65776
CG5989	1.79425	1.83108	3.31912			4.65617			1.93029		1.66852				2.48052		1.95002
CG6045	2.01313	1.62948	2.38026			3.39719				1.60806	1.95576						1.84548		1.74943
CG6230		1.74409		1.76128	1.5256	2.93299			1.94641		2.22208						1.97059			1.75254
CG6388	3.34844	1.81029	1.72316			2.93925				5.58207	1.92437		1.93291				2.4992
CG6454	2.22794		3.0202							1.66745	1.79159			1.65314		2.28149	1.92938			1.56322
CG6498			1.81791		2.04825	2.45381			1.76406		1.7448				2.14036	1.66385				1.71954
CG6607	6.19009	1.91032	3.47565							6.09038	1.75367	2.00394	3.67734	1.90063
CG6621	4.86825	1.61252	8.59587			2.66976		1.60952		1.66794	2.22886									2.15116
CG6689	3.88401	2.05525	2.75566			1.71306	2.13709			3.16655	2.39919								2.15103
CG6744	2.15671	2.0546					2.76768		1.63399	1.72632	2.0516			4.72529			2.60993
CG6808	2.63434		2.82834				2.60577	2.03614		3.16815			2.07463	2.30017				1.58243
CG7133		2.65307			7.91712	1.87089	6.78234	1.80945	2.34076			1.88672			7.13141
CG7206	6.38305	2.37497	9.75555				3.17853	2.3075			2.31308			3.12658						2.46801
CG7453	1.5229	1.52969			27.8168		2.59867		3.47155	2.39916			1.86695		1.57668
CG7741	1.65798	2.22317	3.77823			1.62385	2.83113	1.82523						2.24388			1.60022
CG7766		1.97311	3.04657	2.84385		2.39017					1.91098				2.38644	1.67469				1.84387
CG7791		3.22238	1.59212			1.93904		1.91228	1.55088		1.67702	2.95011					1.82911
CG7839	7.67148					1.63856		1.66533		3.24638	3.54835		5.99397	4.25945					2.12251
CG8079	4.62235	1.71321	8.98685				2.40053	2.19251			1.79358	1.75966		3.22685
CG8219	3.73974		7.48445	4.56758	3.47593		6.48916	27.0017						13.1023		11.1127
CG8334	1.60208		2.52234	3.19243		1.80528					1.68862					3.53583			1.54132	1.6798
CG8441	7.89624						1.94195	3.85369		4.70906	2.19784		3.85541	8.77114				1.83418
CG8494	2.21684	1.79256				2.00075				1.86127	2.14224		2.03943				1.74885		1.80706
CG8611	6.89521			13.1247		2.67066	1.75662			3.94093	2.81994		2.48386	2.58878
CG8636	11.9078	1.80639	2.15625							3.39871	1.83701		2.46899	4.32039					2.02439
CG9018	4.52434	2.2674		2.15703						3.04022	1.68576		2.68783	2.50056			1.84575
CG9170	5.02005		1.78863					2.04125		4.5122	2.45677		2.11147	1.81861						1.65777
CG9641	1.80722	2.05185						2.06651		1.75941	1.8044	1.68341	2.59829						2.17761
CG9667	6.73565							2.50588		4.32988		1.70909	2.6359				1.96795	2.18285	2.36282
CG9784		1.93416		1.83668		1.67789			1.77453	2.01499		1.93333			3.52872		1.67682
CG9853	1.7913	2.16194				1.59969	2.00808			2.81977	2.04014	1.64334						1.77846
CG9934	2.01154	1.69932	3.06238			2.47407				1.52397	1.82607								1.5509	1.80405
Chc		2.36144				2.59758	2.45548		2.18197		1.99011	2.34226					1.82675			1.725
cmet	3.24454					1.99338	1.77422			2.58738	2.22861		2.2604	1.80868					1.64582
Cog3		2.981	2.284			1.88847			1.97453			1.63512		2.10123			1.84316			1.89274
CRMP	1.94814		5.69561	6.45162		1.88582		2.30934				1.66179							1.96752	1.72586
CTCF	6.66586		1.81108						1.5809	3.63957	2.53405		2.80336	4.13953					2.99907
ctrip	1.71652			1.74119	5.11335	2.78177			3.04958		2.01264	2.09725								2.40511
Dbp73D	2.66516						1.72853	2.19628		2.07352	2.35524		1.53082	7.61827					1.63291
Dek	7.48063						1.87154	2.07189		3.06037	1.86688		4.33422	3.09044					1.56641
dgt3	3.62316	1.75714	2.33314			1.53713				1.9749			3.00683	5.24999					1.70318
Dhod	3.37115	2.55728			10.1206		1.70201			3.37707			2.1896	2.11338			1.70742
Dis3	2.4715					1.76676			2.92883	1.98268	2.51643						1.93199		1.5957	1.71118
dlt	2.66779					3.52883		2.45731			2.44625			2.37964		8.57069	1.6679			1.94824
DNApol-alpha180	2.0673					1.72393				1.8451	2.40504		2.11951	2.45368					1.81628	1.68231
Doa	2.17926		4.13378		2.04673	3.29976			2.28783		1.64477				1.54395					1.63056
dp	1.70844		1.99769			1.97974		2.00174			1.93196					2.10978			1.62541	1.9395
Dp1	2.18604			1.8287	1.67562				1.67524	1.94107		1.80687	1.71248		1.95251
drosha	1.58407				1.82734	2.04033			2.17571		2.10316		2.14123		3.75604		2.37516
dup	2.20515				21.7104	1.63538			2.88843	2.19703	1.89701						1.82372		1.63929
Eaf6	4.39538	3.20499	3.29657				4.03586	2.57589	2.27178	2.19344				3.9883
Ef1alpha48D	2.61574	2.17284							3.13747	2.7252			1.86503	2.73284	2.1595		1.7002
eIF3-S10	4.72685					2.03979				4.68958	3.12602		4.0895				1.83746		2.74608	1.62701
eIF-4a		2.49218	2.09559			1.93254	1.94308	1.93955	8.01579			3.17621		2.06438
EloB	2.48905	1.73152		2.49318			5.86777		2.15366	3.70577		2.17304	1.7837
Elp1		1.5766				1.82335	1.95728			1.71947	2.06424						1.83836		2.04843	1.69926
Elp2	2.8155	1.83623	1.87847			2.38365				2.73916	2.57144		1.55913						1.82869
ens	2.66194		2.31335					1.61694		1.94324	1.53827	2.69266	2.67132							1.60814
Eogt	3.27615	3.37438			8.72669	2.21694			2.7667	3.06409					4.81396		1.96448
eRF1	2.43045	1.85729	2.91482				2.38566		1.97063	3.52531	1.58994			2.22261
E(z)	5.17667		2.70712			2.61581	1.77946		1.60655		2.79204		2.66873	2.62538
fabp		2.09491			3.08326		2.99814	2.57611	3.7519			4.98408		2.82828				1.61578
FANCI	3.03649		4.17301			2.43286	2.59839	1.68575	1.88336		2.04524			2.09985
Flo1	2.47149	2.12057					4.32729	2.39111		3.12213	1.87728	2.05939	4.30017
FucTB	2.3574	1.54463	5.12871		2.06832	1.87669	2.11218	2.60324				2.06757
GCC88	5.01226	2.30094					1.66239	1.76607		4.41474	2.47205	2.8431	3.94412
Gdi	2.03905	2.43293					2.60428	1.87026		2.33616	2.00039	2.30352		1.83928
Gem3	1.80242	2.32593					2.9084		1.77183		2.16948		1.77328	2.59126			2.06978
Girdin	3.37309		3.64462			1.68181				2.14772	1.76762		1.61052			2.61089			1.60321
Glt	2.62932					1.72763			2.55077	1.93089	1.93677		4.35888	1.88062	2.63577
Gmap	3.7947							2.4693		3.02641	2.35452	2.62115	2.57227						1.66231	1.7316
Grip128	1.96339	1.77507			7.38441	1.69708				1.75062	2.11632				2.35312		1.99087
GstD1	2.45136	6.22493	2.98474			2.13236	9.03851	3.54151						4.62127	1.71323
Gtp-bp	2.90717				1.74622				1.52711	2.31856	2.15141		2.11185	2.33291			1.82539
Herp		2.31305				1.98965			1.60013		1.78733	2.50386		1.80892	1.87397	2.39722
holn1	6.84031	1.76356					1.62123	1.60002		4.06983			2.54027	3.49069					1.80807
HP6	4.60563			3.45207	3.14607		4.07952		1.73981	1.94385								3.85114	2.97006
Hpr1	1.90697	1.96133	2.64564	1.9413		2.67805					1.73915						1.60502		1.78529
Hsp83	4.39801	2.13456	2.05918		4.60439					2.26449		2.38595	1.89262	2.22017
Hsromega		2.83375	1.59162	1.60427			5.04084	4.79558				1.7147	1.81354			3.2123
Idh	1.58419	2.58314			3.01699	1.60708	2.0493				2.01802				1.98726		1.54979
IntS9		2.38925			3.15163	4.01068	1.70285		2.72431			1.77082			3.6301		3.14143
Iswi	2.70848				2.19966					2.6367	2.1345		1.76201	2.2776	1.61951				1.55547
kcc		1.58958	3.18188		2.83118	2.03239			2.56115		1.93073						1.79071			1.66507
l(1)G0196	1.6771		3.42094	1.76462	3.09212	2.9071			1.99334		1.91891				1.72487
lva	3.75114			2.2674						4.35244	2.81539		2.21084	1.87604					1.89449	2.33803
Mapmodulin	2.54187				2.06437		3.01877	2.66512		2.01576			1.64127	2.34465	1.95119
mask	2.0248					1.67913		2.35169	2.50902	1.57089	2.10089	3.39618								1.91002
mbc	1.87216		2.21555			2.96408			1.81322		2.0005		1.59453			2.54487	2.0039
Mcm10	2.49501			1.59772					2.47909	1.84509	2.03636		1.85971	2.77859					1.69382
me31B	2.2484	2.13009	1.50696				3.26698	1.88326		1.82885	1.60759			1.78287
MESR6	2.71846	1.66284	1.72266					2.2032		2.42916	1.78614		2.12712	1.57618
Moe	1.9472			2.58409			1.59899	2.1999		1.8029		2.09864	3.55865	2.32491
mre11	1.75767	2.18788	2.02425	1.62099		1.78726					1.93205		2.5991					1.54605
mRNA-cap	2.07486	1.55987	1.87611			1.8664			2.12366	1.89271	1.83717		2.26467
mRpL38	3.49946		2.7365						1.96231	2.48473	1.9571		2.36216				1.83278		1.72515
mRpS11	1.66521	1.89992			13.8769		3.93425	2.02824	4.70606	2.59912				1.75181
mrt	2.81494		2.20894						1.59252	1.85035	1.85189		2.44456	1.82034	1.52155
msd5	2.88461							1.94066	3.73586	2.17706		1.73337	2.6245				1.95266	2.60249
MTF-1				2.52707	2.82345	1.9006	1.74675	1.65851	1.84612			3.00862			2.64128
Mtor	3.36059					2.02468				2.8617	2.30954		2.02685	1.72537					1.79414	1.78203
mus205	2.29081	1.7526	5.36328			1.75939				1.67158	2.25997					1.94859				2.30368
Myb		2.05854			6.76866		1.72847		1.84984	1.95363	1.88676		1.63141	1.89516
Mys45A	8.40407					2.08178	3.84415			4.62437	2.84855		3.09107	2.92995					1.78065
Nap1	4.67089		1.85094						1.68728	1.62175	1.58016		2.68914				1.74186		1.77598
nbs		2.00547				2.56129			1.57708		1.90107			1.8598	1.53807		1.62167			1.76706
Nnf1a		2.00929		2.62956			3.4131	3.98238	1.67196			4.81052	3.51588					3.01274
Not10	5.13148		3.29753	11.1392		2.25571			2.27692	3.03499	2.02896						2.22324
Nsun2	2.49228			1.69032		1.98651				3.58845	2.3851		1.87435	1.5772					1.94797
nudC	1.79319	2.81568					3.49575	2.83308		1.96824		2.98612	1.84486						1.54147
Nup358	2.73811					2.93626			1.9706	2.16924	2.63802			2.67455	2.5844					2.16282
PAN2		2.43546	3.1607			2.48157			2.27013		2.15029			1.67977			2.13727			2.06784
Pcd	5.93058	2.57998						2.18392	3.08566	2.28197			2.10788	2.47104				2.54051
Pcl				5.41121	10.464	1.5732	2.32207		2.59102		1.88756	2.01157			2.79617
Pgi	1.72674	6.92182				1.92597	1.66263		2.36372		1.80969		1.97127							1.68308
phr	4.26453	1.57939	1.72065							3.03998			2.01228	2.22011			1.80551		3.61443
Plap	2.91294	2.18412	4.07615			1.73617				1.73256	2.08158		1.67							1.56867
Ppn	2.09536		2.94826			1.92988		2.31511	1.63684		1.75358				2.64616					1.59037
Prp3	2.55972	1.87463				1.68434				2.28841	2.11843		1.68714	2.27671					1.70086
Pxn	2.08897		2.04481			2.90983			1.94626	1.73678	2.43721						1.80006			1.82833
RecQ4	1.79179					2.18195				2.04791	2.97994		1.59877	2.18799			2.76849		2.06133
rept	2.84078	1.87332							1.66781	3.59361	2.55528		1.73695	1.7683					1.59491
rhi	1.88912	2.72263			2.79266		3.32465		3.25945	3.64572					2.68233		1.86487
RhoGEF4		1.98264			29.1302	2.41487	2.41392		3.56638	1.78912	2.28349						2.54243
RpL13	4.65079	2.63725	2.56848						1.72162	2.83645				4.78234	3.01382		1.66154
RpS6	2.58366	1.76179	1.72006			1.92402			2.22755	1.82124				4.05107			1.99958
Rrp6	2.47649					2.43594	1.72356		1.88236	2.28494	2.73324		2.16271	3.37753
Saf-B	6.16141		3.73557			1.53733				3.25641	2.34847		3.19328	2.87754					1.98791
Sas10	16.3378		2.3148		1.72882				1.63658	5.85492	1.80761		6.28683						2.30278
SdhB	2.12554	2.52648							4.13099		1.65605		2.72231	4.17168			2.162		1.92006
sei	2.74246	2.0237	7.30144			2.97333		1.81516	1.61383		2.25022			2.67222
Sgs1	2.57463		6.3004			5.8498		6.49987	7.00781		7.31077			4.21634	81.1473
Slbp	2.51323	2.27219		1.8672	1.99205				3.91624	2.37652		1.74465		2.02557
slik	2.21829		1.89498		1.76187					1.59991	1.80612				1.57442	2.5171				1.7071
SMC2	5.95392						1.8506			4.85933	3.48907		7.26994	3.25983					2.11202	1.6528
SNF4Agamma	1.90154		2.70255			1.75682		2.31947	1.54004		1.63833	2.0686								1.82829
Sox14		1.57192	1.72246		3.01515	1.65018		3.43274	2.38415		1.58037				1.87728
spag	1.76004	2.45826						2.26014	2.88412	2.92877	2.15848	1.71077		3.66109
spn-E	1.82516	2.70963	6.73593	2.07521		3.01093					2.14437						2.31472			2.55957
Sra-1	1.66195	1.73421				3.65746			1.73709	1.57671	2.09393						2.22116			1.79018
Syx5		2.19521	1.53187		1.55084	2.03179	1.78377		4.8216					3.50791	1.69931
Tap42	2.48326	1.80661			1.92292		2.20541		2.11862	2.39117			2.02585	2.34811
TfIIA-L	2.48449	2.15746	3.93537		3.85276				4.45947	1.69275	2.41733			2.7472
TfIIFalpha	14.1758							1.58395	1.646	5.98486	3.12329		6.99952	6.91191					2.31395
TfIIS		2.55655					1.88061	1.93701	2.06972			2.46132		2.4805	3.15618		1.5853
Tig	4.31756					1.69058			1.75255	3.55997	2.5456		3.98292						1.80462	2.47845
Tip60	1.68611	2.50689	3.74432			2.00447		1.80444	2.48651	1.53041	1.83708
Top3alpha	2.95721	1.68738								3.63965	2.77489		2.12957				2.48618		1.67296	1.8855
trr	2.01923					2.51425			2.12323	1.66021	2.08291				1.68687	1.52295				1.79178
Trxr-1	2.19325	4.67523	2.7736			1.78021			1.81322		1.7961				1.89469		1.95578
tws				1.63174	4.51541	1.65366	2.30155	3.71835				5.58527			6.87388	1.8416
U4-U6-60K	2.04126	1.5817		2.68747		1.57189			1.56532	2.53792	1.71539			1.59636
Ube3a	2.28305		1.65944			2.24121			2.14482	2.44645	2.18809		2.22958							1.59056
Uhg4	2.67455	7.55969	18.4488	2.78804			4.96296	5.88308				3.89768						3.151
unc-45	1.82506	2.04973		2.36602		1.8054				1.95293	1.90291		2.29517						1.69649
und	2.78375				2.67658			1.95844	2.93507	2.13794	1.68182			2.33251			1.68014
vig2	5.86107				1.62372			2.21059	2.64225	2.96067	2.35317		3.14399	3.69082
Vps13	3.15076		2.22853			3.29773			1.74805	2.14443	3.18195								1.69325	2.52277
wcd	2.78354					4.16675			2.36149	2.53765	2.46025			1.98496			1.79526		2.00884
WDR79	2.27004	2.23621	2.48985				3.17666			2.01598	2.00792		1.71823	2.39409
wge	2.08654		3.19509			2.29946			1.66672		1.96922			1.78033	4.22059					1.59634
Xbp1	2.0962	2.01301					2.09272	1.57869		1.68224				1.66257			1.59641			1.65117
zip	5.30453							2.0791		3.89909	3.0161		3.82724	1.92545					1.58507	1.91967
4EHP				2.31994			2.02945	3.62611				3.6846	1.65927	1.71152		1.67282
4E-T				2.8789	12.3123	2.98547	2.2009	2.45871	2.08362							1.79733
Aats-ala	1.75991	2.58106				1.91654					2.22855			1.56267			1.8133			1.79831
Aats-ala-m		2.17125	3.05607		3.03406	1.89028			2.42157		2.18582						1.94408
Aats-ile		1.86306				2.22746	1.96067				2.50841						2.62247		1.59139	1.66821
Aats-thr	3.86646	3.15082								1.91937	2.16899		2.82128	1.98789			1.63636
ABCB7	2.10958	2.15838	2.00197			1.63754					2.07441		1.60545				1.78291
Amun	2.59717							3.05015	1.65071	2.19628		3.0234	3.78673		2.04345
angel	3.41829	2.16878			2.07448					3.82708	2.39974		2.14379						2.10086
arx		2.98151			3.07745	2.20118	3.97268	8.42504	2.62087			1.97316
asl	5.40946						1.70252			5.25319	2.83776		4.7223	2.37807					1.89408
Atac2		2.20042	2.57469		8.18018		3.23955		2.28532					2.97529			3.25104
Bap60	1.64615	1.95875				2.52391	2.18195				1.90379				1.88283				1.56953
barc	3.77382		1.8941							3.54261	2.19143		2.88483	2.30621			1.82076
bdg	2.15492	1.5722	2.24728			1.84871				1.68382	1.76993						2.11931
beag	5.32512	2.33148								4.80094	2.88045		8.24191	3.43153				1.56138
beta4GalT7	1.54147	1.79016			2.22387	2.17906		1.70324	2.15391								2.24563
blue	1.90005	1.77871	2.48016			2.15036					1.8741						2.14448			1.53309
Bruce	2.56072		2.0309			4.55574			1.90818	1.8513	2.65228									2.61833
cactin	6.23796	1.52287								4.69106	3.06079		6.43267	2.12625					1.84729
cana	3.84881		2.52311				1.93895			3.16367	2.18184		2.15141	2.06404
Cap	5.8951									5.85474	2.73308		3.65038	2.56428					2.29597	1.57994
Cap-D2	1.85485					2.59134			2.09085	2.0251	2.04564						1.88746		1.81716
capu	1.71647		2.00043	1.71778	1.66505	2.25793					1.5962				2.47294
Cep135	3.7328	1.5779	2.90328							3.71691	2.24705		3.11031	1.75018
CG10103	1.74069	1.91063	2.1807	5.37339		2.64909			1.55729						2.36741
CG10158	1.59158	1.80196			4.19392		1.96313	1.79562	1.68553			2.57779
CG10333	5.44643						4.59174			4.59821	3.4083		6.0707	2.57374					2.08733
CG10602		2.45663			3.41396	2.54127			2.52327		1.73284				1.75609		1.79925
CG10631	2.23539					2.72046			1.759	1.84201	2.13635		1.65267							1.66592
CG10638	2.0422	2.06913	1.94667	1.63325		2.10055	2.172											1.81951
CG10927	4.41294				2.02631			1.86388	2.44009	3.42856	1.94935			2.22902
CG10936	3.62175	2.11876	3.91926			3.36102			2.96557	2.61559					4.84456
CG11306		1.85842			1.87438	2.38343	1.67704		5.32496		1.61741						1.98006
CG11307		1.8611	4.22568		8.54064			2.70046	1.68153			2.1762			3.89006
CG11412	2.32379		1.72104						2.04725	2.35311	1.70619		2.66863	2.10428
CG11504	1.85985	2.09666			1.7864				2.99364		1.79077			4.16399	3.81564
CG11583	5.62136				2.4136		2.12829			3.04965	1.56946		2.28426	3.83964
CG11696	4.5557	2.34578	3.01946								3.03732		2.37515	3.76729			1.81364
CG11723		1.92285			2.02191	1.61751	2.14234		1.98572						1.70577		1.64506
CG11897		1.79987	2.68731			3.62564			1.79229		1.66654					1.58985				2.18322
CG11961			1.60641		16.0332	6.40038			4.08651		2.44977				2.47086		3.77177
CG11970		1.679				2.24312			1.61625	1.57964	1.89035			1.99129	1.91343
CG12107		1.59591			1.73896	3.4168	1.9769		2.00016			1.52657						2.69496
CG12163	3.56842	1.93324			3.40959				1.64805	2.71594	1.84721		1.55753
CG12173		1.70996					2.26361					1.87962	2.87967	2.14939			1.68539	3.35111
CG12259	7.29194							3.90137		3.84663		1.92585	10.8222	5.9666				1.62627
CG12304		1.96632	2.15142	2.40211	2.80255		3.17958		1.86614									1.69789
CG1234	2.88106						3.69079			2.1559	2.43498		1.96085	3.39966			2.14219
CG1236	3.07852	2.48127				2.15925			1.93942	3.75197							1.99381		1.85737
CG12391	8.93542						2.03522			4.17776	2.19669		4.43669	3.06548					1.74041
CG12393	2.47516	2.20956	1.89492		1.85488				3.36419		1.59601			2.24329
CG12493	2.55031				5.48592		5.52648	3.80081						5.40001			1.68596		1.75641
CG12502	4.48484		4.76933	17.3366	5.28231	2.22406		1.96813								3.42761
CG12768		1.56397	2.67649		2.24899	2.80307			4.67663						5.71457		1.65292
CG12868	2.18012						3.07679	1.99138		1.75659		2.224		3.09036				2.17344
CG1291		1.83404				2.17315	2.17937	1.53258	2.16741			2.23378			1.54271
CG1354	3.06652	1.71135	2.35757	1.77147	1.71885	1.70277				1.82638
CG13617	2.2093		15.9593	7.8871		8.55019		3.85454							2.17794	3.9999
CG13625	14.9323						3.96586			6.08549	3.51455		8.33846	8.7939					2.83916
CG13868	2.05556	1.69228	1.54574				1.70819	1.8631	1.62558	1.82977
CG13917	2.6718									1.9662	1.96119	2.21649	1.87901	1.62199		1.51754
CG13957		2.47814	2.38999			2.91921			2.81791		1.87476				1.59459		2.45672
CG13994	2.152	1.71016			4.84141		2.3698	3.19792	3.40948	2.50027
CG14230	9.37722		1.62977							5.73827	2.16366		6.04483	2.40915					2.33423
CG14299		1.58244	1.94893			5.34519			1.91874		2.2233						2.47957			1.82437
CG1440		2.18819		2.46173			4.23249	1.97202				1.99633	1.65225	1.6211
CG14476		2.06704				4.20316			1.8133		2.13686				2.97784		2.0136			1.86516
CG14641		1.60543					2.03096	1.81545	1.90555		1.60741	2.50881		1.93843
CG14722	1.87105	1.91533						1.56565	2.51558		1.87549	2.03744	2.21894
CG14921	10.1536		3.61866					3.50343		3.83062			3.53983	3.53227				3.78512
CG15073	3.73676	2.16271					5.93204			2.76486			1.99519	2.3778	2.24372
CG1513	2.78264		3.14211							2.49709	2.14888		2.117				1.76419			1.71821
CG15312	3.18262		3.73213	3.58294		2.6182				2.52002	2.22342					2.57568
CG15445	1.7611	1.96557				2.65471					2.00766		1.65592		2.10819		1.84254
CG15735		1.55519	2.20243		23.4717	1.9797		3.67465	4.58619				2.98255
CG15747	12.8452		3.14402	4.89145				2.49702		4.82767			4.24237	4.4977
CG15771		1.98651			10.9806	3.30697		1.94791	3.05566			2.23071			12.0726
CG1677	3.33619				4.35296					2.88009	1.93197			1.64288	4.09277				1.72229
CG16817	1.80308				9.65075		2.29162	2.06928	2.13025			1.7526		2.58503
CG16908	2.26559		2.73989		2.09658	3.45565			2.05932	1.97883	2.19238
CG16940		2.14272				2.46824			1.96057		2.12723			1.94239	3.15259		2.52094
CG16953		1.95129		4.59601	2.38236	2.48477			3.12553		1.69292				1.63655
CG17259	4.19403	3.0667								2.14884	1.98232		2.71294	2.44631					1.62692
CG1789	10.5468						1.72481	1.62402		5.64719			3.15271	9.09369					2.22233
CG18476	2.42861	2.06123	3.66757			2.91143	3.37496										2.54279		2.51553
CG18557	3.00433				2.5528		2.25046	1.87902		2.44555		2.37531					2.08832
CG1965	2.58416		3.69101					1.77502		1.97442	2.05075		1.60116	3.14702
CG2021	2.53401			2.25501	22.1669		3.53375		4.84796					2.74109				3.74645
CG2107	2.86294	2.25359	1.79049			2.66795			3.83851	1.87563	1.84293
CG2144		1.59196			5.45007	4.58207	1.69021		2.62291						2.01853		2.28139
CG2247	2.23462	1.53414	3.58736					1.64734			1.77231	2.02552		1.89111
CG2493		1.94816			5.69642	2.14051	1.76156		5.57219		1.59917		3.58986
CG2658	2.34462	2.42118	2.30426	2.7219						2.20125	2.5474		1.83219
CG2691	2.53063					2.01406			1.55011	2.12958	2.19952						2.1198			1.54411
CG2906	1.84755	4.76115	4.19008			1.89839	4.88935	1.93614							2.30243
CG2926	2.20786					1.59432					1.87195			1.85752	1.7114				1.595	1.77494
CG30344		2.07048	2.8074	1.68707		1.91084	2.12914		1.66762					1.88545
CG31126	2.89547	1.72851					4.04634	2.66595	2.25615	3.71703								2.84384
CG31918		1.90175				1.71059	3.71686			2.29936	2.22253		1.9005				1.61641
CG32164			1.79627			3.97977	1.62894				2.20987			5.21354	1.83832		2.44064
CG32368	14.1317						5.74331	3.555		7.34745			12.1177	2.8681				2.60905
CG32473	1.62681	2.54715			1.9491				2.10801		2.06826								1.56813	1.5867
CG32549		2.58029		7.16676		3.42582			2.11038		1.62686				3.50935					1.74277
CG3358	5.53374	2.25145	2.61561							4.22108	1.87517		2.11753				1.96135
CG34174		2.69482	3.49708				16.7249	7.10914	18.7784			2.4739		10.6616
CG3520		2.06625	2.47335			2.67703			1.6586		1.9045				1.70444		1.74622
CG3534		2.49426				1.79453	2.42988		1.71849		1.66086				2.08327		2.47285
CG3566	2.56237		2.11774				3.6931			2.43838			1.87195	3.59954				3.44839
CG3605	10.4485									6.09039	3.29596		10.0685	5.46464					3.34374	1.72241
CG3735	2.85814		2.58287			1.78431				1.63119	1.65774		1.73837				1.58602
CG3909	1.86347	1.86396	3.73126			1.8069	3.06219			1.67069								2.483
CG3939	1.66539	3.58281					14.7418	4.65388	2.3597			3.71192						4.45141
CG42240	2.51152	2.19936						2.85484	1.87154	1.75789		2.49358	7.84396
CG42593				2.38561		3.44108		2.16246			1.83192	2.68977		2.47349	2.29348
CG4281	1.65092	1.64282	1.60573						2.05335		1.86483		1.63352				1.99927
CG43367	1.59801		3.1667			3.59913					2.10489				2.32837	2.35736				1.82071
CG4365	1.97995	2.07767	1.67021				3.43654		1.77046	1.84422	1.80209
CG4452	1.6185	2.67747	4.9339	2.38593			2.20509	1.87005					1.58527
CG4630		2.69844	5.80019		2.19559	3.58303										1.88053	1.53624			1.68417
CG4679						1.74084			1.65274		1.93299	1.70929	1.54824	1.88984	1.5682
CG4829	2.50506	2.02248			5.06023				2.35892	1.97211	1.75931			2.30164
CG4896	5.67642		5.49456					1.70917		3.15652	2.50174		2.45923							2.28872
CG4957		2.11971	1.96323				7.15986	4.82769		2.86557				2.72341				2.37961
CG5515	5.68547						1.82222			4.05169	1.70123		11.6193					1.6127	1.97206
CG5674	2.13525		3.19841	1.83856		1.59695						2.05281			2.59836	2.01281
CG5789	2.05651		2.86771	1.68449		2.23792				1.83346	1.55917					1.64846
CG5800	3.3962									2.18633	2.34105		2.39579	2.16433					1.71435	1.64641
CG5872	2.04598	1.75281	4.60107	2.57035	2.38089		1.94565									2.83957
CG6013	18.9863	1.97824						3.90128		8.85836			10.757	6.34317				1.99639
CG6073	2.86632		1.96747				4.45373	2.07358				2.10829				3.65238		1.88348
CG6195	2.51677	1.53444	2.22395						1.9752					2.51377			2.42389	1.83413
CG6197	6.40713									4.77219	2.81848		11.5022	1.59136			1.91647		3.28615
CG6227	8.62703		1.96422							4.66592	2.64262		4.71884	1.78524					2.03142
CG6418	4.28413	1.87903				1.73971			2.46914	3.18987	2.48038		2.42795
CG6511	1.53325	1.98421	2.40149		1.87994	1.75959					1.64134									1.7152
CG6512	1.54812	2.15042								1.83606	2.78202		1.77568						1.59414	1.73691
CG6712	11.487						6.63617		1.86324	3.95804	1.94263		5.93789	3.61941
CG6729	1.6567	2.63563							2.42243		2.86023				2.07997		2.8233			1.96571
CG6770	2.11571						2.56526	5.52475		1.91638			5.68001	2.77944				2.11407
CG6907	3.25315	1.7888						2.43041	2.2805	2.33254		1.90217		2.36245
CG6912		2.30886	2.11301					2.96772	3.39988			2.14388			5.05263	5.77936
CG6966			1.76286	1.97169		1.58024	5.1817	2.11997	1.68266			1.93642
CG7220			1.85265		2.08994		2.41818		1.74597			2.69773			1.66505	2.14005
CG7288		1.98964	1.74745		14.4699	2.8601			4.76802		2.07271						2.00796
CG7371		2.68927	2.70532			1.96937				1.77425			4.89969	1.63743						1.73169
CG7686	7.49757						2.0515			5.13332	2.70278		2.57162	2.22841					3.03586
CG7728	4.8216						2.02186			5.31311	3.86445		5.15215	3.81779					2.56111
CG7852		1.88415	2.25328	1.71377		2.68725					1.64374				5.04674	2.56376
CG7878	1.56446		1.7025			2.64905				2.06095	2.20589		2.21851				1.70201
CG7911	3.51179							2.72732		1.96956		1.98148	3.50109	8.47467				1.87842
CG7920		1.95946							3.04518		1.60635			1.80451	3.21468		1.6377		1.69085
CG7928	6.158				2.7426				1.86647	2.35669	1.80413		1.93299	2.03408
CG7946	2.73414	1.57061								2.26081	1.64014		2.51697	2.85756					2.14936
CG7971	7.59593		2.33288							3.79314	2.45346		2.89234	3.84136					1.86175
CG8149	2.48851						3.47835	2.77893		2.28551		1.77386	1.85015	2.14757
CG8177	2.2649		2.36655			2.01233	2.61605	1.71362						1.81166		1.60627
CG8301	2.66271	2.20586	2.05081		3.29371				2.40758	1.92929					1.63872
CG8378		2.39845			3.22309	2.29853	2.02252		2.40591		1.94036				5.95707
CG8379		2.4628	1.73832			2.08057			1.98674		1.65565				3.35909		1.64047
CG8412		3.31589	1.81134			2.71558	6.18976	1.92611	1.63774		1.77727
CG8417	1.97875	3.25696					1.92536			1.93741	2.23841		2.48769						1.56405
CG8547						1.78321		2.21041	3.26996		2.0808	3.45638			2.53098	2.23031
CG8860	2.46957				8.40822		3.23912	3.29125	4.13745					1.7869				3.47697
CG9044	1.7339	2.36992	2.60554	3.44446		1.98559			1.82772											1.57629
CG9143	6.4664		1.7391							4.70591	3.09718		3.70537	4.33579					2.98315
CG9248	4.9942	2.38081	2.06466		5.5486	1.76081	2.84265								2.05754
CG9330	1.97504	1.7142	2.32066				1.84165			2.66753	1.81669		3.81251
CG9601	2.22799	2.34819						1.52995		2.60787			1.80565	2.02877					1.94607
CG9743	3.08021		3.61199		2.26487				3.20317	2.61623	1.60778				5.8238
CG9922	5.10303						2.59553	4.14563		3.95085		2.59847	7.54966					3.05622
CG9947		1.58187	2.17212	3.25444	1.9894	2.37009			1.93125						2.26479
Chro	2.97421		1.82649			1.75539			1.9353	2.32915	2.2511								1.69552
CkIIalpha		1.85371				1.6394	3.23941	3.05961	1.72531			3.39416		1.69998
Clc	4.20156	1.87929					2.88698	1.70149		2.83316	1.64168			2.47829
cnk					3.02967	1.79119			2.3246		2.27513		2.13563	1.6926						1.56563
cnn	2.25125			18.7653						1.89309	1.66165		2.18288	1.734		2.76696
Cnx99A	2.78049	2.21371	2.23478							1.61626	1.92041			1.59212	2.12215
coil		2.09839			3.58403	1.65811	2.39565	1.911				2.45708		1.83441
Cont	1.97804		3.50114	2.36676		2.32865			1.79564		1.79604			1.61418
CoVa	3.09865	1.82616								2.57875	1.86191		2.81589	2.64915				4.52521
CoVIb	1.67121	1.67884					3.10582	1.61817	2.78459				2.08691					2.63084
CR33294	2.44228		10.0113	3.33503			10.7999	6.46664				2.37839				9.33931
CR43242	2.10506	2.97676					2.958	2.66284		2.47548		2.24378	2.1154
CR44295			2.86473	13.4931	4.26602	5.23808	4.45728								32.8939	3.17824
Crag	2.15723		1.66154		2.94817	1.97574					1.60946	1.80849								1.61225
CstF-64	3.54236	1.79602							3.2248	2.45494	2.14648		2.5161						1.98699
Cubn	3.45973		5.56599			5.75303				2.85459	2.83243								1.64685	2.57694
Dbp80		1.68213	2.15749	2.43805	1.57231		2.97467					2.08465						1.74435
Dgp-1	1.64803	3.24591	2.82999		1.97217	1.62401					2.01131									1.80604
Dhc64C	1.87789					4.2224				1.70761	2.32346					1.60219			1.71481	1.79722
dia	2.98819	1.60889		1.90026						3.03709	2.16636		1.69438						1.77654
DNApol-alpha73	2.16782				3.15342				2.2278	2.47944	1.85447		1.70833				1.57515
DNApol-epsilon	2.36205			1.79824		2.37531				2.18588	1.97088		1.60979						1.65085
Dpit47	7.57057								4.4073	5.85217	2.33748		3.68219	2.68676			1.54192
Dscam1	1.57252		1.95055	2.48381		1.74887					1.54339				1.57319					1.81828
Dyrk3			2.82093	1.90899	8.37535	1.79071	6.55251	3.72568				5.17094
Dys	2.50199		2.19944			1.90211				2.20495	2.15791			1.74165						2.33776
Ef1gamma	1.5888					1.64909			3.56048				1.96895	1.86443	1.88847		1.61921
Efa6	2.50129		2.27649						1.82722	1.79363	1.68085		1.80338			1.56691
eIF2B-beta		2.26843			13.7762	2.15439			2.40447								1.85066	1.73111	2.1426
eIF-4E		1.56613			2.37648			2.04186	2.02616			2.79599		2.06277	2.4362
eIF4G						2.10488	6.9604		2.06952		2.30856			2.04238	1.86757				1.81071
EndoA	1.60839		1.78106			1.62752		2.43653				3.26886	1.92245		3.1654
Es2	2.864	2.38572			2.08953				1.56643	2.32871	1.96205					5.71752
Fancd2		1.59439	3.11395	3.7911		2.35429			3.06548		1.871						2.08295
FeCH	1.66451	3.75343	3.18269			3.18759	2.61221							1.52559	2.51234
Fhos	1.81123		3.4371	1.96627		1.76587					1.77317				1.55911					1.9696
FK506-bp1	14.1199								1.8282	8.17088	2.17994		29.2964	3.26476					4.04405
fliI	2.55507		1.74377							1.92243	1.77499	1.60653	1.68128							1.57472
FRG1	2.4723						3.58638	1.79908		2.73792			2.64679	3.04309					1.84179
fzr2	5.39538	2.83436	10.793			3.34446		3.15999	2.28971		2.48643
Gadd45		3.05628					2.28494	4.22522			1.61323	1.98137	1.66029	2.38009
Git	1.57011	2.09201	2.25033		1.54709						1.567	1.59273					1.52707
Glycogenin		3.9393	2.74546		1.81158	6.61089		2.04702				1.68482			62.475
Gr61a	6.32817	1.80231	23.1504			3.61661		3.93468											3.84008	3.0168
Grip84		2.20076	1.78297		2.41326	1.62857	2.74123				1.88927						2.19172
GstD9		2.55061						3.86034				2.26553		2.15519			1.84678	1.9464	1.54293
Hcs	2.28946	1.8761	3.8968		2.23841	1.80826					2.12419									1.92121
Hem	1.80874	1.94202			3.90458	4.0607			2.98274		1.91903						2.31067
HIP	2.33641				1.96839		2.92239	6.73866		3.02635		4.42564	1.96481
hk	2.46264	2.60159	2.34977	6.91858							1.85494			1.84788						1.87888
Hk			3.77648	4.07585			3.08184	7.55714				2.02854			1.99309	4.09831
HPS4		2.07538	2.242			1.98706	2.20446					6.48807			1.61577	2.16356
Hr78	2.77175	2.36107	3.71727			1.94977				1.93339	1.89416					2.30241
Hrd3	1.64323	1.91007							1.80378		2.87314		1.56985						1.69755	1.77885
htt	1.94769		1.86721			2.91795			1.61431	1.75942	2.59454									2.02346
Ipk1	4.77446		5.12377		3.66757	2.55428				3.1948			3.18617				1.63692
Ir62a	12.093		21.5081		2.63769	12.1301		3.30932							5.15672	38.1218
Irp-1B	1.8291	2.56414	2.45512	1.89337		1.61641					1.54087									1.51683
isopeptidase-T-3	3.46539	3.35763	6.09227		3.0868	1.84985		1.62245								8.3504
JhI-1		2.20069		2.07901		2.15444	2.15654			1.93567	2.03751						1.76011
jub	2.95121	2.05614	1.95769						1.7151	2.52001	1.87685		2.63231
Klp67A	1.5866	1.68638		2.08052			1.63543			2.26193	1.67151			1.67053
kug	1.69763					2.35046				1.59437	2.08358			1.51861					1.82468	1.90383
l(1)G0007	4.42861									3.9816	2.80473		3.29093	1.6378			1.86098		1.77268
l(1)G0193	1.59954	1.69924			1.55566		1.74243		1.61565	2.08536	1.65987
l(2)37Cd	1.84755	2.64609			2.21113	4.31652			2.00024					2.66971	1.80706
l(2)gd1		2.51044	2.15705			2.23244				1.56149	1.60945			2.24061	3.02937
l(2)k05819			1.74665			4.47899			1.62432		2.27447				1.81862	1.61599	2.5669
l(3)L1231					4.93113	1.65015		2.41504	1.64488			3.60825			2.00905	1.78078
LanB2	2.56016					1.68308			2.48166	1.94194	2.52852		1.61044							1.60471
Lig4	2.05221	3.36042							1.63342			1.75052		1.70849			1.76397			1.68209
Liprin-alpha	3.3816		2.34249					2.01127		2.24708		4.25449	2.08738			2.69879
Lpt	3.64268		1.95415					1.69245		3.64297	2.42715		2.91868	2.4924
mahj	2.37294		3.35912			1.98001			1.59652	2.235	1.90496									1.70767
MED1		1.57073		3.97018		2.15756			1.60061						1.79979	2.12314	1.8132
MED14	1.90883		2.02153			3.00233			1.59209		1.91215						1.97107			1.88507
MED23	1.58117		2.74357		1.9943	3.19332			2.21858		1.80864									1.93555
Men-b			2.31436			2.13179	1.96308		1.81494			3.21702			3.7659	3.51111
Mer	2.20341	2.06344							2.01071	1.58737	1.81943		1.86356		7.18669
Mesh1		2.07568	2.34609				6.13209	2.68291				2.4749					2.05628	4.17532
Mf		1.99371			2.6145		4.01464	3.34412	2.43096			3.8963				1.72681
MFS3		9.27545			2.9912	3.01023			3.13253		1.90831				2.55176					2.08037
mgr	5.32577	1.74558	2.04661				2.59311		2.253	3.55412					4.03023
mino		1.80051		1.83378	8.41423	1.60411		2.19691	1.54004			2.2462
Mio	1.76375		3.22921			2.64972			3.07788		1.77397				1.99114					2.07752
mod	3.44657					1.98522	1.88405			1.79268	1.93432		1.75471	2.42623
mrj			2.08017	2.23691	3.38198		2.44226	1.94112	1.81806			1.66524
Mrp4	1.93369	1.76154	3.71025			2.3243					2.0238					2.55976				2.32549
mRpL12	2.19086				2.43952				2.41709		2.16556	1.7535			2.42747			2.54908
mRpS16				2.3806	2.82509	2.86483	4.36584	2.28687	2.02568									2.67488
mRpS30						2.24834			2.1295	1.68448	1.94899			2.16063			1.65598		1.5639
msn	1.77458		2.69122						1.76977		1.72822	2.25493							2.21896	1.65811
mtm		2.61077				3.11779			2.55269		1.9434	1.86034		2.006			2.29306
Nat1	3.63107			3.21597					1.68352	2.53923	2.14408		1.76359				1.72397
nclb	5.86533		1.62289						1.77257	4.33966	2.24732		3.18738						2.01981
ND75	2.6165	1.77117								1.9811	2.70102	1.87454	1.54252				1.59113
ndl	5.48371		7.59276	4.87552		3.58434				2.55529				2.30566		14.2662
Nf1			1.84112			4.1448			1.97069		1.82202				1.89202	1.69651				1.74047
Nle	2.68565		2.40703							3.82037	2.87002		4.30275				2.63193		6.66105
Nmda1		2.74412				6.01241	4.38141	1.81845	2.00079			2.44002			2.50071
noi	2.10307					1.86161				2.23807	1.92311			1.87152		1.96017			1.77552
Ns2	3.31087	1.94331					2.61323			2.6446	2.38885			2.38694					1.71573
Nsf2	1.71583	1.92814	1.62251							1.88651	1.57076	2.08858	1.77496
Nup133						3.46784			1.64067	1.74446	2.47505		1.66035				2.00038		1.80917
Nup154			1.94208		1.6052	3.1262			1.57466		1.97279						2.01741		2.75555
Opbp	1.68206	1.65334	2.44223			1.83365		1.58607		1.8877	1.83891
Oscp		1.55671	1.74661			2.14001	3.72026		2.45972					2.36305				2.77812
Pak	2.36932		1.63974		1.75411							2.43948		2.62441	1.88877	1.93264
pbl	2.65963		2.65993		3.57229	1.64215				1.61502					3.22344	1.8523
pen	8.86799									4.58877	2.60614		9.0202	5.74015			1.57487		1.97552
Pep	3.6074							2.46054		2.23533	1.51343	2.33574	2.33609	2.23416
Pi4KIIalpha	2.32737	1.76827	3.6588		2.68374					1.77837	1.73026					2.61505
PMCA			2.69434			1.71126	2.33915			1.6439	1.57872			1.98571		1.74949
Pmm45A		2.19509				1.744	2.15154		1.90904	1.93986	1.59789						1.68573
Pmp70	2.39807		3.68297	4.66694		2.94478		1.66018							1.67545					1.90668
pnt			1.94244		3.83319	1.64877		2.02165	2.73854					1.6269	2.19389
porin		1.75392			2.99183		2.05808	2.37026	4.89291			1.99103						1.61921
ppk29	6.02613		21.003	2.01906		4.40267		4.39051					1.97084							3.64638
Prosalpha3	5.70541	2.05215	2.17758			1.78427				3.22457			7.13521	2.2577
Prosbeta3	9.60474	2.52357	1.70145				2.04974				2.33841						2.08491	1.88164
Prp18	4.37622	1.63164						2.01618	1.69534	4.37656	1.99728		2.96068
Prp8	1.57808	1.59326	1.83145			4.30822			1.76165		2.64451									2.09632
Psn		2.11798	2.92396		2.55845	2.49744			1.73462			1.59542			2.25739
ptr						2.88437			1.64979	1.97358	2.46132	2.79527			3.95751	1.66808
px			1.78764		3.39768	1.635		3.41902	2.49196			2.69527			4.55098
RabX1					34.9808		2.05036	3.17107	1.9027			3.31964		1.7659	1.68215
rad50	3.56254						2.68296			3.65268	3.1241		4.45393	2.93775					2.40464
rb		1.66509					2.12191		1.85343	1.81336	1.88805	2.69511								1.99789
Rbp1-like		1.50115			13.5954	2.29595	2.95937	7.58074	2.73911						8.10249
Rga	1.61321	1.9698	2.61472			1.78356		2.24925			1.85157		1.97023
RhoGAP19D	1.94501			6.68311	2.68481				1.9028		1.57222	1.93643				2.64123
RhoGAP5A	1.72167	1.75723			2.21529			2.5313	2.31001						2.2785	2.12448
RhoGAP92B	1.74875		2.04472	5.92182			1.69004	1.62719						1.77408		1.72374
RhoGEF3			1.8138			2.31505		1.7719	2.15943					1.66636	1.71559	2.29124
Rlb1	4.66512						2.56463	3.51748		4.11444	2.90353		5.95807	4.59135
Rlip	8.21971	1.68699	5.30269		2.06078			2.41959		4.58799			3.06538
RpI1	2.45521					2.88059	1.93242			1.84707	2.81912			1.73826			2.61764
RpI135	1.99435					2.33948				1.85969	2.41281			2.62663			1.81704		1.75886
RpL19	3.51449	1.89074	2.20431			2.00616			2.11699		2.16882			16.7367
RpL24	6.23409		2.70543				3.36875			1.94726	1.78004		3.19147	3.57465
RpL34b	3.5631	1.90522	1.79441	2.25334					1.67328	2.31934				5.34383
RpL6	6.30468		1.61855						1.70493	1.9315				2.65112	2.48436		1.85992
RpS11		2.07809	1.78535		2.65392	3.13145	1.89086		3.33609					3.91892
RpS9	5.49956	2.58416	3.20058			1.99201				2.21679			1.81473	3.08856
Rs1	7.29352						2.40232			5.1952	3.42531		6.50448	3.38207					4.73858
rut	2.38348		1.86888		2.06074	2.30169			2.64072				1.77127		2.25104
san		1.58396					1.57253	15.1109	4.53629			4.95781		2.43714				2.19495
Sap30	3.48618							2.21634		2.50454		1.82418	4.29941	1.70604	3.47454
Sec8	2.19807	2.17547	2.40403							1.68182	1.52635						2.05944			1.70739
Sesn	2.47806		2.74025	6.31507	2.86707	1.58242			2.00817						1.71465
Sgt		2.78042					1.94007		1.71822		1.67254		2.18421	2.18148			1.5386
Sin	2.74988	1.73183	2.27175				2.06718			2.33295	1.56132						1.60329
sktl	2.30456	1.67033								2.9356	2.07691		1.93284	2.03266	2.13777
sle	3.97014			2.92212			2.59933			2.75644	2.31653			3.28073					1.60195
Slu7	10.818							1.97597		4.73261	2.21175		4.22949	5.37972					2.34638
smid	2.17606		1.68507							1.68174	2.39575						2.13336		2.09628	1.6504
snama	3.19664		1.65392							2.36832	2.18168		1.90831	3.2608					1.58642
sni		1.71465	1.97069			2.26315	6.38434	1.90948	2.07638								1.79178
Spn27A	2.22207	1.79562							3.3152	1.96022	2.09774		3.15458				2.19696
Spn42Da			3.52534	2.78722	2.70688	2.68555	2.48308	2.29134				1.80489
Ssrp	14.2436									6.33955	2.97702		8.02797	5.61669					1.8604	1.68403
sub	1.73088				2.82235		1.71019		2.06155	1.89988				1.9539			1.74408
sws	2.02372		2.01445			1.81703			1.88195		2.04436			1.60896	2.6794
Synd	2.93874		2.22365	1.66677						3.1321	2.41548		2.37664	2.05151
Taf1	3.18139		1.92308			1.59944				2.2951	1.94823			1.59048						1.95681
TAF1B	4.11808		2.05632					1.57118	1.55241	2.59776	2.12601			1.74946
Taf2	2.767					1.61322				2.499	1.80833		1.84623	2.58308			1.76613
Tango6		2.3254			2.59482	4.67156	2.337		4.06883						1.96718		3.00588
TBPH	2.01028	1.93222	3.74333					1.90975	1.91265		1.58144					5.12304
Tcp-1zeta		2.17734			5.10738		1.91661		2.10994		1.6772	3.38485		1.59579
tho2	2.44273		2.13623							1.89814	1.96835		1.85867						1.70431	1.69201
thoc7	5.70576							2.72897		2.76812			2.36043	3.71437				1.68536	3.28226
timeout	6.79192		4.26563			1.78423				3.80776	3.20372		3.36611	1.76711
Top1	3.76483							2.10757		2.88916	1.98012		3.30123	3.41423	2.3534
Trax		1.58969					1.62854	2.1741		2.36431		2.75876	2.94663					2.10135
Tret1-1			4.40449			1.59761	2.78682	2.59996			1.75093					2.07141				2.39234
Tsc1	4.12878	1.64232	1.61876							3.01804	1.95582		2.29883	2.24313
tsr		1.8978					8.73829	1.8702					2.0303	3.06286			2.20865	2.63256
Ttc19	1.87589	3.01388	1.58537							1.77419		2.72767	2.01055					1.70546
tun					1.86113			2.10184				1.74588	1.64255	1.91647	3.94307	1.82343
U2af50	2.8528	1.84801	1.53002		2.67528				2.26763	1.89966			2.25652
Vha68-2		2.02085		2.89872	3.2616	2.62784			2.14991			1.77014			1.9967
vito	11.6856							2.12731	1.67492	5.08229	2.03032		7.16499	5.34136
Vps20	5.64966	2.13145					1.87276			3.44178			4.45795	2.76649				1.86072
Vps4	2.32098	1.80669	1.69138							1.7358	1.718		2.48808	2.25734
Wbp2		2.92283	2.44613	1.55782		3.1022	3.64335		1.95141			1.93751
Ykt6	2.59648	1.63547						1.67448	1.70234	1.6523		1.74221		2.19294
yuri			3.75015	6.61699		1.82291	1.67115	3.73344	1.6711			1.69958
Zfrp8	5.96649	2.03925	3.86716						2.42281	4.05639							1.7624		1.83045
A16	2.62209								1.78618	3.38966	1.56247		2.29628						3.19814
Aats-lys				3.22684		2.42111			1.64894		1.70721		1.65753	1.72368
Aats-val	2.04503	2.98081	1.7154								2.10108			1.72764						1.81771
Abl	1.62057					1.77585			1.66371		1.84263								1.52131	1.82873
AdipoR	1.56488	1.73888			11.7513		5.84318							1.5395		1.80234
alpha-Spec	2.16188									2.2541	1.95462		1.59755						1.69568	1.62727
alphaTub84B		2.07735				1.97992			3.06927				2.11818		1.90101		1.81493
alt	2.86814							2.56205		2.89318		2.76051	2.78758	2.14688
AP-2alpha		1.67848				1.68895	1.846				1.89842			2.15419		1.57552
Arpc4	2.16609								1.9901	2.33884			2.41893					4.58256	2.83958
Art3	3.14162						1.60689		1.56235	3.25686	1.5983						2.02324
Atf3				2.53077			2.83606	3.90911				2.97685			2.62804	1.80197
ATPsyn-beta		1.9214					4.8958				1.84034	1.89369					1.5866		2.00463
aub		2.71761				2.63377	2.52676				2.32171	1.99772					2.37444
Bap170					9.54742	3.12128			3.4804		2.18497				3.78574		2.45317
Bap55		2.01032				1.86552		2.01993						2.21207			1.81095		1.66484
bel	2.53993	1.88622								2.25823	2.49246		2.17504	1.76391
beta4GalNAcTA		1.9616	1.93449	5.89742		2.21513									4.95609	4.97265
beta-Spec	2.45959							3.38063		2.2836	2.37545	2.50161								1.79204
bic	2.15067				9.99171				2.89835				6.81197	4.39612	1.75712
BicD			1.99013	1.85003	1.75215		1.61764					1.96124				1.75127
bin3					7.72966	1.55533		1.81386	1.59092		1.96508	4.46457
blw		1.55331						2.97205	2.78316			5.13466		1.63436			1.63138
bonsai	2.20296						3.32327			2.25178	2.03536		1.66272	5.53691
brm	3.44188									2.5506	2.25137		2.28879	1.6495					1.74293
btv	3.21562		6.33007		2.53893	6.25923		2.90158								3.37319
ca	1.82955		2.18613			2.13694					1.65359				3.13575					1.67242
cact			1.98355				1.78799	2.13899	1.74999	1.68383				1.75016
CapaR		2.2253	2.98536		3.01373	2.28493			1.98785						1.83965
CASK	2.73686		2.35278	12.3893	1.71897					1.81353										1.6099
cbs	3.39527	1.95087	5.09186					1.58357		2.40818										1.82357
CDase		2.12679			1.60687	2.2016			3.33205		2.57894						2.93294
Cf2			1.72522	7.26165				2.13326				3.32802			2.29993	1.68728
CG10053	2.02041	2.31138						2.67669				2.21661	2.21713	3.1866
CG10254		1.58545	3.01773	1.85575		2.42527					1.82218									1.56845
CG10286	1.54581									1.87939	2.39645	1.70543	1.79117				1.73062
CG10321	3.53279		2.20149	13.8684						1.98634			1.92368	1.52211
CG10395	2.2535						6.66822	3.61147					2.56356	2.29063		1.70653
CG10463	4.31187		1.92223							4.58253	2.75954		2.76332				2.07443
CG10470				1.68476	2.7589	1.80598	4.51361	2.40492										5.08043
CG10508			4.95328	2.66389	9.13821	2.67196		2.14037	2.53065
CG10777					1.86035		1.71668	2.6686	1.79644			2.3301		1.82256
CG10924	1.87622	1.75877					2.99629	3.22904		1.794			1.89048
CG10958	5.57059	7.78333								3.9124	3.25193		4.23252				2.54604
CG11248	2.26163			5.01872			1.8766			2.45389			2.2977			1.75649
CG11417	6.56349									4.00518	2.01693		8.95349	3.30364					1.6927
CG11455	3.23607					2.19025	5.32923	1.86004					2.39715					3.43551
CG11739		2.15086	6.29925			2.26784	3.30243		2.26834						2.2301
CG11839	2.33385						8.64972	2.2742		2.72262			2.22444	2.33865
CG11851		1.94352				2.89713	1.59825		1.89929					1.9616	2.33739
CG11985					1.99335		2.10913	6.09921				6.80909		2.04693				4.124
CG12018					3.63688	1.59893			2.38728				1.57756				2.02307	1.67894
CG12099	1.65711	3.25151	1.69257						1.98399		1.59524			1.68046
CG12203		2.10549		8.45136			2.8941				2.62196		1.98294	2.8866
CG12229	9.33835		16.4842					3.88434			3.48653				4.6079				4.49918
CG12702	1.85086	2.17979	2.18144	5.59932		2.36379					1.6986
CG12974			1.94767	2.08588			1.89136	2.7131				1.54806			1.88033
CG13163		2.08975					3.11407	1.85421	1.58526			1.67002		2.54171
CG13185	4.43549					2.15981				2.26062	2.15178		2.36704						1.80034
CG13742	1.94236	1.9501		3.78415		2.6517	11.1254	2.29846
CG13901	3.82618	1.74303							2.43512	2.08492				3.02015	2.10435
CG13924	8.35565		7.58784	5.36526	4.45714			3.04741								42.3808
CG13926		2.92685	3.04462		2.43268				3.60839						2.35924			1.97584
CG14043	1.76411	1.9802								2.0648	1.66617			2.07784			1.66839
CG14073	2.52974				2.43288			2.86986		1.90814			2.16705		1.66675
CG14215	2.96406					2.53222				2.54155	2.45626		1.69492							1.58625
CG14232	6.38533	2.13687	2.60338						1.83791	5.54917			9.33717
CG14408	1.69287		2.96614	2.03866	2.61532								1.63125		2.59468
CG14411		1.70424			20.1452		1.85724	1.74334	4.06942						4.3343
CG14441				2.36769	2.12398			1.73395					1.50464		1.65085	1.64372
CG14543	9.59675						2.54729			5.84277	2.47406		9.76241					3.91579
CG14562		1.69666	2.97811	4.57821		3.03304					1.83237					1.64493
CG14621					2.88625	1.8576			1.75442			2.32704			2.68632	2.60094
CG14814	4.68857		4.1022						2.6625	2.2908	2.53837			3.47053
CG15525		1.53122					6.50309	4.95362				5.47825		4.15321				5.12827
CG15547	6.12609		14.8376			7.51986	4.32369	3.11672								6.55715
CG15602	2.61297	2.67757	3.9482	3.68822			2.3825	1.91266
CG1578	3.84681		4.37113				1.78469			2.87618	2.00601		2.43878
CG1620	5.03539				23.7249					3.66845			3.1844			2.11801			1.77738
CG1657	2.00156					1.62069				1.95797	2.25133		2.08846	1.61301
CG16789	4.30254		7.67734			2.57928	4.43388	2.92428					2.48424
CG17249	4.08879								1.73492	3.51831	1.6973		4.83876	2.35541
CG17265					1.78196	1.6402		1.85311	3.43517		1.63561		2.4853
CG17292		1.90617	1.98587			1.67289						1.86166				3.12775	1.97547
CG17494				3.75174			2.21756			2.12868	1.87022	2.81175		2.28953
CG17841		2.00255						1.7954	1.65117			3.8288	1.55996		1.95471
CG17912				2.43544	3.88064	1.942								1.78352	1.69377	4.00991
CG17985		1.6555	1.80265		2.01162							2.41097			1.64716		1.82006
CG18446					36.7896	3.13579	2.91774		2.68366						9.2255		1.94536
CG18815		2.54032	1.79269				6.29017	2.72302				2.13059					1.88501
CG2124		2.18723				2.49677			1.87412	2.6721		2.71517					1.87689
CG2202	5.27341		3.18207						1.73101	2.7401	1.9097					3.49338
CG2790	4.73518									2.37762	2.12993		2.86425	2.09611					1.98749
CG2852	2.02511	2.02673			2.76025				2.55016	2.04796								1.82169
CG30062	4.1126		3.90632	7.69412		5.26408		2.7764								8.52748
CG30089					5.09543			3.37848	4.20389		2.04604	2.73226			29.9492
CG3021	4.7571	1.69178			1.55938				3.50115	1.70344					3.29726
CG30484	1.7455	2.96316					4.18202	2.00967						2.76605			2.79061
CG31142		2.62579					5.25137	3.20971				2.4833	3.31708					2.22853
CG31156	2.09053		4.63872				1.73224			1.95652	1.75775		2.11027
CG31223	3.45344			1.87953						3.16337	2.36036		4.05525	2.65961
CG31388		4.01197	5.89798		8.03238	2.57311			2.25931						8.07407
CG31436	2.42205	1.90347	2.89827				2.32037			2.15107	1.72566
CG3165	4.35013	1.63405				1.68829				2.89615		1.50971	2.01698
CG31793	2.3115		2.03935			3.13691				1.58167	2.19669									2.41995
CG31922		3.23316		6.61964			7.03296	2.81182						2.77816				3.95336
CG32039		1.84229			2.99767		11.7421	3.5986				3.40521						2.03751
CG32082	2.19749		1.98323							2.50704	1.62313		1.83895							1.61644
CG3209		1.78917	2.56544		7.87974	1.7894	2.05819	1.6566
CG32104		2.62318	4.2397								1.97696		1.90509				1.69023			2.13081
CG32243		2.53031	1.92117		6.52874		3.59167	2.12648						2.5499
CG32485		2.39474					1.76441	1.62529	1.55503					1.74117		1.56554
CG32533	2.25176		2.49244			3.06435			2.20007		2.40328						1.69573
CG32554	3.41952						3.22339	5.32127		2.93859		8.96414						3.58803
CG3262		1.75825		2.42715			17.3879	1.79177				2.53965						1.87614
CG32719	7.4675		12.0436	8.38775			6.54596	15.2966				5.10106
CG33051	8.97611						2.61464	1.97216					6.02048	10.1627				2.15469
CG3321	1.7279	2.05352					2.51751							2.41135			2.49358	3.26149
CG33303		1.71577			4.07973	1.7301	1.66174		2.90164						2.30789
CG3335	7.53576						1.75273			5.38553	3.28156		4.11786	8.41594
CG33926		1.99443					2.9044	2.43188	1.57803			2.68613						1.98895
CG34408	1.62131		1.8363		1.90924				1.56751		1.67233									1.64284
CG34439	3.50721						1.69286	2.56999				2.25394	4.38499					2.26018
CG3511	3.10767		3.36268			1.89413			2.13908	3.03207							1.69949
CG3632		2.54504	3.82459			2.56003					2.1742						2.02728			2.03217
CG3689			1.85516	2.55378	4.4484	1.72056	2.30646		3.25967
CG3726	2.48443		5.67692	4.78944			3.72898	4.9801				2.17046
CG3800	6.49918				4.37794					2.32352			3.85678	2.35404	2.55926
CG3887		2.27842			8.24777		4.7981		3.72381			1.98118			2.2965
CG40042							4.82645	1.68069	1.6636			2.05352		1.66051				2.1388
CG41099			2.46071			1.55016	2.02711	1.97329				2.81924					1.62938
CG4210	4.155						4.85823	4.2157		2.88267		3.26077						2.51791
CG42233	2.12695		4.67469	6.87946	6.52622	3.14933										2.19302
CG42238	1.63983		6.10755			3.79709	3.09072	5.55343								2.73935
CG42358		2.05818		6.30194		1.94154	1.88122			1.96304				1.88238
CG42514					14.3081	5.77746	2.23918		6.3934			4.3262					2.83499
CG42553	2.42037	3.97343	5.56636				3.66603	1.63957				2.2702
CG42684	1.87061			2.03181				2.32886	1.68945			2.11682								1.70475
CG45186					3.16785	1.66708			1.9354			1.75498			2.57115					2.35679
CG4538	1.56776	1.59715		3.49779							1.83561	2.17181		2.13256
CG4552		2.07759			1.86963		1.53564					2.47757			1.98773		1.66815
CG4553	3.94388	1.63013								4.48709	2.84361						1.73228		5.03619
CG4709	12.2722	2.59709	5.54992							5.33695	2.3818		2.68926
CG4733	2.68661		3.25273			2.21269	2.62117	3.89577	2.75089
CG4747					1.75832	2.07966		1.64723	1.67592			2.33147			3.1231
CG4901	2.08756	1.8894					1.64685				2.03606			1.95384			1.89847
CG5028		1.67726		6.31513			2.06425					2.05576			2.80833	1.78021
CG5045		2.06534			3.01108		3.68027		1.69574					1.56994	3.3576
CG5151							2.38457	4.11189	1.76343			2.66446	1.85737		5.92904
CG5270		1.89271	1.76708			3.51811					1.79857						1.79281			1.84777
CG5323	1.55939	2.027					3.01611	1.6276				1.72397						2.1928
CG5382		4.3455	1.79491			2.13882						2.23127			3.55869		2.10708
CG5484		1.8005	1.69837			1.90663			1.58694		1.78493						2.01236
CG5618	3.29293	1.53189	4.9023				3.56995	2.45778				1.91261
CG5642					4.13356	2.77607			3.61406					2.56675	2.8701		1.9678
CG5728	2.85192									2.782	2.60989		1.63153	2.153					1.73511
CG5886	8.52411	2.56345								5.66873	2.71498		8.56687	4.73491
CG5919	1.69568		3.8527		8.66486	2.1453		3.14837	2.83405
CG6182	3.3244	2.70869					2.46015	2.1249		2.34279			2.37904
CG6340	2.85446			2.02156	5.08185		1.78649		2.92601				4.14305
CG6357	2.03526						25.9693	2.06716		2.38231			3.28819	2.98494
CG6509	2.21313			7.89666		2.02543				1.67649	2.02148									1.74456
CG6550	1.65665		1.8902		3.9436		8.59158	2.04886									1.81369
CG6752	2.01119	1.67887	4.3988			2.23701			1.57722		1.90417
CG6766	2.01441	1.84988	1.55565						1.76141	1.70109	1.91631
CG7154	2.04067			3.86977						2.3342	1.92675			3.42886			1.64248
CG7172	11.201						1.99539			4.10458			8.93375	4.17861				1.85283
CG7182	2.11176					1.61918	1.71792			2.1227	1.67983						1.64288
CG7183	13.7528	2.25977								9.08805	3.1608		11.3045	3.6825
CG7289		2.47086			1.96552	1.68787			2.48973						2.53004		2.00811
CG7332							3.84493	5.93221		1.82006		8.05464	2.32447	4.42546
CG7488	2.17136	1.68379							2.24305	2.14144	1.99209						1.61053
CG7630					1.95023				4.03411	1.7839			2.93623	2.25536				2.99463
CG7705	1.58389	2.71985	2.18113							2.00522		1.95223					1.62895
CG7837	1.92995	1.72634	1.74558			1.89184			1.70436		1.94694
CG7956			4.47078	1.91857		1.73513										4.54521			1.60207	1.5967
CG7967		2.03079	1.98726		1.77513				2.55499			1.62691			3.12567
CG8008			6.50649	2.27252	1.73902	2.8035	1.71188									2.35296
CG8036		2.57554			2.3592	2.65116			2.63851		1.54937				4.66021
CG8046		1.5971	8.11597		4.20386	3.87191	1.71206		2.41999
CG8202		2.78101	4.7348	7.00858		2.82831			1.75112								2.73842
CG8235	7.26754	1.62552								3.07989	2.13249		6.75603	4.21928
CG8306		2.35043	2.6404		5.68954	1.83856			1.93156						4.45582
CG8331		1.71961		1.80696	2.50408		3.06291		2.67078									2.34091
CG8360		2.49758	2.49621			2.7528	3.09265		1.79827									2.64073
CG8386	5.73148	2.50291						2.25412	1.98234	5.88098								3.84124
CG8414	1.58237					1.8046	2.1109				1.94399			2.74517	1.6905
CG8500	1.81381				4.03538			1.57039					5.62751		1.95657	3.15912
CG8569		3.44008				2.15067	2.17899						2.02476		2.80311		2.10868
CG8635	9.40876		2.1053							4.44759	2.12121		9.22971	6.05441
CG8786			2.79609		1.97454	1.96793	2.64143					2.72362				1.9706
CG8858	1.81738	1.81117				2.13053				1.93424	2.02654									1.86591
CG8939	3.63452									2.33164	1.54531		3.12715	2.41561					1.63878
CG9149	1.74184	2.15032	1.81637				1.63721			2.32207	1.8337
CG9213	4.25994	1.72421								2.64398	2.79183		3.32667	4.43802
CG9270	3.97457		7.0884			4.12521	15.6786	6.40085								7.00607
CG9356	4.1407	1.69644					2.33505			3.84217		1.71303							2.36553
CG9485	1.61078	3.11256	1.64017			2.46741					2.25635						1.89246
CG9593	3.26068				2.46927		3.14594	2.83761						3.0554		2.58675
CG9596	3.79085		2.48107			3.31157				3.29991			3.32395				2.38467
CG9603	2.3492	2.25886	1.67284							3.72494		1.64593						3.23906
CG9630	2.597								1.7037	3.02198	2.03237		2.26128				1.58117
CG9706		2.0969				2.54955	1.74153	1.60318	1.68915	2.37953
CG9752						3.08297	2.79827	2.97193	2.52992		2.03266	2.00632
CG9839	3.24902		3.27383			2.11709		1.67989	1.9814								1.99941
CG9886	2.20871	4.31363		2.42235	3.87053	1.72602						2.21564
CG9911			1.7626				3.37165	6.53507	1.7339			4.54534	1.68571
CG9953		1.88838		13.478		2.11587			2.24016		1.91703						2.32567
chic							2.3772	1.95965	2.01167			1.94531		1.76556	1.67304
chp	3.90746		11.4526		2.98388	3.27569			2.70024						5.35169
ckd	2.12782		2.74819				2.94263	4.47589				3.26347	1.78996
cona	3.22081						5.4438	2.92265				1.63262		3.76256			1.85266
Cp190	3.57006									2.68896	2.23858		2.46209	1.94952					1.9999
cpx	3.75772		2.45855					4.66455				5.16876	1.96041			2.04659
CR31514			1.96757	25.0677	2.19118	2.34876	1.58737	3.79339
CR42646			4.01209		2.15418	4.03683		2.98659							1.93722	1.91987
CR44138		5.0405			5.55679		6.64735	6.80394	3.98097			3.01124
CR44283	2.44518		14.2477	1.98224		6.68949	2.92536									3.30262
CR44331	1.56862			1.70727	2.46366		1.96736	3.4149								2.2224
CR44911			5.25388	29.8196	11.2806	10.5049	4.29634								4.04092
CR45217						3.27608	4.44868	6.89964	2.61997			2.57184						3.17792
crb	1.95985		2.5839			2.77993					2.11513					3.85785				1.73186
crm	1.91326		2.15832		3.03206	1.77065									4.48865	1.86068
crn	6.51753									6.09834	2.85661		7.7648				1.6896		2.60917
CSN3		2.72359	2.06729		2.05962	2.02747			3.67045						2.0061
CycK		1.66853		1.99569		1.77994	1.60323		1.58894						2.02544
CYLD		4.2071	3.12957				4.47687	3.06678	2.12707			5.31182
Cyp4e2		4.8125	14.3153		3.51047	5.13182	2.37329								2.69347
Cyp6a17	2.13538	3.10215	3.1458								2.02859						1.82834			1.88211
Dad			2.17447				1.87949	2.18404	1.78279		1.56824				4.38497
dah	1.90409	1.73477	3.07451					1.5225	1.62801		1.64537
Dbp21E2		1.66235				2.20975	1.90483		2.43925						1.86589		1.6532
Dbp45A	4.54557						1.72335	1.67053		3.4418			1.63178	2.66588
Dhc36C	6.68368		11.388			4.83517					5.10809		3.32912		2.94405
Dhfr							2.52114	2.18245		2.08065		3.76533	2.74012					3.67036
DhpD	2.14218	1.60233	1.90387							3.19662	1.80531								1.78323
DLP	1.82897								3.54619	1.74046	2.2403		1.96996		1.80631
Dmn	1.71321	1.6806							1.66101	2.74249	1.63663		2.09655
dream					4.75482	1.64906	1.8201		2.05854			2.95732			1.91516
Dredd	3.74996		10.2585			4.54708		2.28301	1.9982		1.69695
ebd2	3.57738	1.58944					3.20896	1.69511	2.06575			1.98343
ecd	4.0788	1.57525								4.37178	2.64409		2.17636						2.11336
eco	2.07059								1.97931	2.18094	1.73263			2.06222			2.10323
Ect4			1.80033		5.3338	2.06775		2.83453				3.62047			2.38389
EF-G2	3.2047	1.77709	5.82819				1.90851			2.49394	1.92704
eIF-4B							3.92884	3.94424		2.07829		2.95173	2.71427						1.77311
eIF6	1.88688						3.2708		2.78517			1.68932			2.39262			1.64977
EloA	1.79501		1.81325	2.717			1.55271							2.60145		1.54974
Eno		4.88893							2.28566		1.97988	2.49932					1.66382		2.61438
ERp60	2.87962	1.63133							1.63225	2.88619	1.89988			2.25576
E(spl)mbeta-HLH	4.58477	2.49712					4.02251							5.74261	3.14744		2.64903
Ets21C	1.66338		2.93903		2.85624			1.77942	1.67857						1.72245
Ets97D	2.41464	1.55715	1.88443		2.41418				1.61547					2.55928
E(var)3-9	2.08715	1.65972	2.10934	1.8271			2.2842							1.97292
faf	3.04248		2.33295			3.47473				2.20426	2.42521									2.23441
Fcp1	3.50745	1.51387								3.25941	2.73459		2.38005						1.85978
flr		2.26268	1.75359		13.3695	2.63477			2.05915						2.59978
Fmr1	2.64232			13.3193	2.99967			4.36194		2.70048			3.24971
foxo			2.04012	1.62652			3.27799	5.19408				3.46561				2.1106
fs(1)Yb		2.2879				3.45999					2.93386	1.60142					1.58132			1.68757
gammaCOP		1.8982	1.64016			2.59142			1.81114		1.83359				1.68701
Gbs-76A		1.85551		3.55684				2.17526				3.64775			2.53412					1.69537
Gmer		3.05299	3.29296				1.88966	2.47736	2.95266								2.68143
Golgin84	2.66895	2.26468					2.13776			4.55527							1.59679			1.61125
grau	4.77622	1.63631	2.5521							3.18652			2.82663	2.20942
grsm					2.29561	2.40622	2.92631			1.71827	1.74993						1.67731
Gs1l	1.82932	2.65143	2.74672				3.14178			2.29657			2.45462
GstE12		1.76211		4.75275		3.71851			1.94941						2.22387		2.21387
hay	2.45915	2.57152	1.88489			1.61627					2.19329			2.5584
HBS1	2.23546	1.8817								1.70146	1.68156			1.54061	1.99933
Hel25E	1.81937	1.8485	3.41849					3.11062				2.26562							1.84646
Hexo1		1.66374				2.15682			1.59824		2.46933						2.44044		1.8255
Hop		1.62894			14.9317			1.87799	1.85937	1.65846		2.21312
hppy			3.23294		3.47268			1.64962	1.64541							1.60255				1.71467
Hsp70Ba	1.77025	1.98375						3.13808					2.50624			1.90532			2.60227
Ime4	3.33061									3.32241	1.74143		2.02389	2.44047					1.5972
IntS2		2.14283				2.27091			2.55794		1.69815				1.79299		2.02186
IntS3		1.74192	2.46682				5.49824	1.77118								1.59108	1.64966
Ip259	3.39349						1.89449	1.717		4.85954			2.77731	4.45345
Kap-alpha3		2.19947			3.61077	1.71712	6.25602		3.03413			1.85006
Klp3A	3.52532			2.18434		1.62941				2.41995	1.6207								1.63146
Klp61F	2.32291									3.17173	2.27982		2.10457	1.6374					1.61128
l(1)G0230		1.70303	2.5568					3.69262	2.62232			3.99833		1.62911
l(1)G0334	1.80719	1.90514	1.71048					1.57946	1.59215		1.60819
l(2)05714	2.26205	1.71181						2.0944		1.64715			1.92699	2.19035
l(2)09851	2.77734					1.55428	3.51437		1.78282	1.97604	2.16428
l(2)37Cb	4.19362		1.84813			2.56472				3.55175	2.63709		3.30578
l(2)tid	7.7878									5.02159	2.05019		2.92091	2.79247					2.65615
l(3)76BDm					2.00067	2.65109			1.58657		2.13642						2.09775			1.64362
ldbr	1.75313	2.08999							1.92984				2.07795	3.76248			2.775
lost	1.56422						1.79497	2.96103		2.22423		3.94593		1.50797
Lpin	1.75194		2.00398	1.73135						1.75045	1.80518									1.7908
Madm	1.5905									1.53556	2.1354	1.94396	1.78185				1.99239
Magi			1.88149	1.54633		1.59883			1.68557		1.69772									1.71793
Mal-A5			2.83222			2.70413			2.23826	2.03823	2.29564						2.18564
Map60	1.83541	1.66581			5.2144		1.51605		2.58888					2.02148
Marf	2.60726		1.62501	3.47243				2.09483		1.60365		2.32925
MBD-R2		1.93436			2.14486	2.22801			1.59779		1.88872								1.86315
mbf1	1.61058	1.9156			1.59105					1.59992		1.79173		1.58137
Mcm2	2.7968				5.89976	3.20691				2.4413	1.67892						1.87867
MED6						1.66443	2.4577	3.91183	1.6963			2.61971			1.92817
mei-9		2.52474	3.07564			2.34558				2.06159	2.20033						1.88652
Men		2.64762		1.71455				1.80025	2.22327		1.92591	4.27925
Mes-4	1.72933								1.73824		2.24273			1.75789			1.84805		1.62993
MICAL-like	1.60332	2.19021				1.6454					1.81863				1.76443		1.86878
Mink	6.31015						2.66496			4.98733	2.56138		5.12676	3.53326
mip40	2.79403						3.02996			2.64489	1.82912		4.11138	3.52604
Miro	2.48339					2.21886				2.52296	1.96569			4.03729			1.65511
Mmp2	2.95072		1.82585							2.09384	1.96408		2.67601							1.50777
Mms19		2.01551	1.85603		1.9506	5.79118					1.8883						1.94896
mRpL1	2.94593									2.29205	1.63108		2.37894	3.89554			2.00362
mRpL22	1.76691				1.86126				4.37848	3.26111	2.17918			4.97117
mRpL51					6.62652		2.75039		2.32391			2.5751		3.91996				2.20416
mRpL54		2.01156		17.6022			6.47213							3.88237			3.35794	2.39305
mRpS9	5.07948		1.88332						2.29349	4.66273	1.83424		1.56293
msk	2.58676		1.71992			1.96402	1.92983				1.67002						1.65662
Mtap		2.15164	1.68823					1.71281	1.89882	2.04537		1.94198
mthl10			3.24714		3.91428	7.3398			1.86818						8.63622		2.32886
mtsh	1.83668		6.60227		2.05881	4.32501		3.1916								2.02054
mud	3.46205			4.17988		1.58061				3.28211	1.85367		2.76974
mv	1.97486		2.63409			3.03309			2.34957		2.12363									1.80979
mxt			2.64975	7.78689	4.26811			3.92063				2.08974				2.07611
Myo31DF	1.85432		3.58224			2.15139					1.77203			1.5859						1.68965
ncm	8.05534							1.94104		4.31344	2.73516		5.41668	2.61526
Ndc1					1.7999	2.24298	2.31403		2.25743								1.64091		1.77114
NDUFS3		1.9038				1.96721					1.67269						2.65141	2.06646	5.08724
neb	1.70719				2.90369	1.86514			1.83508		2.09268						1.73743
NetB				1.88862	5.65323	2.0044	2.29969	2.25143				3.48097
Nipped-B			2.65663			2.07258	5.41002	2.1989						1.9142		1.70655
nito		1.76945		1.73373	8.83889	3.11196					1.95215				2.22666
NK7.1				1.74216	14.9677		2.76956	3.40278	2.68581			9.35066
NKAIN			2.70001		2.63818	2.0018			1.5391						4.38775	2.31574
Nmd3	2.75994			1.85189		2.61826			3.13775	2.65197	2.03924
Noa36	8.36481		1.85137							2.63165	2.36795		2.95947	2.88025
Nop17l	1.60081	2.04218	2.14124									2.20236		1.89025						1.62044
Notum	1.56903		1.78326	2.42504	4.58531			1.70565								4.87014
NtR			2.13047			1.61241			1.73663		1.93772						2.90862		2.05856
Nuf2	2.95094						5.00183	1.95891		2.91113			3.11837	2.76086
Nup37					2.6284			2.76099	1.8293			4.55618					2.21438	2.03004
Nup54	2.18959					1.52381			1.54818	2.50339			1.67871	1.6219
Ocrl	2.41414	1.68479	2.68919						3.51569		2.05576									1.68054
omd	2.70026		2.85636			1.58918			1.85097	1.98217							1.85034
Ost48		1.9775		1.87142		3.31027			1.84257					2.43505				2.01177
OstStt3		1.81727			7.71738	2.80795			3.76964						1.95205		1.79015
Oxp	2.77036						2.70574	5.22759		3.0677		3.2769						3.05699
Patr-1				5.72882		1.57557	1.73585		1.98898			2.89166				2.30363
Pdp		2.52939			3.2223	2.4292			1.82413		1.823				1.78234
pen-2				1.77312	2.55861		3.18694	2.7774				3.3878						2.01446
Pfrx		1.63648		3.9369	4.01635	2.65788			2.14328						13.0958
pgant3		2.25423	3.03483		1.63876	1.69177			2.54309		1.68694
Pgm	1.89819	5.7058	2.46847							1.63926					2.19234					1.91702
ph-d				2.19101	2.22198	1.58839			2.94219						1.75203	2.49983
pit	6.09019					1.84951				2.06066	1.88584		2.32683	4.74656
ppan	5.63701									3.00734	1.6935		3.51997	2.59084					1.63754
PRL-1				2.40113	1.86936		3.08774	2.91388				3.48035				1.78024
Psa		2.48846				1.85904			1.56465					1.86607	1.93311					1.68821
PSR	1.98026	2.27548											1.71186	1.63565	1.74497		2.0699
Ptpa		2.59541					3.06797	2.43683	3.43535			4.28822							1.82912
Pxt		18.2848	56.056			3.95312		20.8905				4.93449			9.22958
pyx	3.29245		3.6907							2.9409	2.30463		2.70641				1.98606
r	2.3263					3.93465				1.70113	2.58918								2.14524	1.80594
Rab14		1.55408			2.77433		3.35734		2.69291			1.84353		1.76305
RagC-D			1.79858			1.73903			1.53894				1.81138		2.5776		1.80331
RanBP3	1.86888	1.91804				1.74325				1.96608	1.67885	2.7056
Ravus	4.44861	3.29862	4.51183	4.06147				2.10785	2.78336
Rbm13	7.68879									4.26228	2.08339		7.86953	2.62184					2.42287
Rbp9	2.64988			3.20168	3.57076			2.78792	4.05927								1.85298
Rcd5		2.03256				2.01804		2.03745	2.70434			3.48323			19.1633
rdgB	1.75256		2.51533	7.28519		2.01657									2.06549	2.60248
ref(2)P		5.58343					1.80627				1.75043			2.52478		1.90584				1.68896
Rev1	3.34255	1.77033	2.65218							3.82566	1.79747									1.72008
RhoGAPp190	1.74557				1.73154			2.70127			1.61354		1.83192		2.28279
RpII215					2.08345	3.68328			1.87668		1.76815				4.49455					1.76466
RpIII128						1.84023	1.56598		1.59759		2.16997						2.43144			1.61647
RpL18A			1.58397		1.97947				1.9778					1.96613	4.74962				1.77951
RpL26	2.53164		2.06072			1.55739			1.65684					1.91829					1.64777
RpL34a	1.64113	2.8259	2.1348				2.98949							5.65479			3.1977
RpL5		1.79601	2.5972				1.83964	1.74884				1.7423					1.71333
RpL7A	1.89371	1.78266	2.7566											9.88915			2.70538		2.043
RpS23	4.83405	1.81303				2.28078				2.70104			3.86468	2.36888
RpS26	3.18927	1.61735	1.70781	4.09604					1.7229					4.81943
RpS28b	1.81661	1.96371					2.33018			2.38513			2.05263					2.23354
RpS30	6.65125	1.5671							2.68976	1.99716			2.3647	6.63348
Rrp1	6.825						2.28398			6.19964	3.04874		5.90869	4.55753
Sc2		1.62925	1.89234		1.77978	4.2698			1.64305						2.24631
Sec24AB			2.01395	1.55568		1.92935			1.56486						2.73641					1.74282
Sec24CD		1.7291				2.60727			3.31008		1.8956				3.91759					1.71305
Sec5	1.7104	1.65733				3.49035				1.80269	1.56691						1.74389
Sec63	2.87553									3.85119	2.42694		2.40854	2.12773					1.68844
Set	2.57857				1.97216		2.26322		1.9096	2.18332			3.81291
Set2	3.12046			3.84278						2.50822	2.13228		2.26816						1.91468
SIDL		1.91828				1.9064					1.95354			1.6086			1.9099			1.98951
sip3		1.55993			2.90582	3.36808			1.51707						3.31983		1.68938
Skp2		2.61791	2.2894			5.21854	1.64726		1.91735								2.09439
Slh	1.7725	1.82533	2.05227		2.05022	1.61598					2.11448
SMC1	3.94957									3.65921	1.99027		2.91824	2.54482					1.71566
Snoo				2.52891	1.99536		3.63661	11.3409				7.09979				1.9484
Spase25		2.13283					4.37685	2.17839	1.62361			2.23803					1.82616
Spc105R	1.99336								1.5948	1.89779	1.92683			1.95583					1.61635
Spn	2.61903							4.29157		2.02811	1.57251	3.29481		1.57079
Spn77Ba			1.57197		7.554		3.78303	1.60038	2.16038						1.73253
spri	1.55668		1.718	2.48383	4.46542	1.55061			1.73642
sra							1.67854	2.08692	2.54789			1.86076		1.68656	3.00192
Sr-CI	4.31347		3.11775					5.81455	12.0439		3.17076	3.44141
srl	1.60466			2.26083		1.9015		1.98902			1.72314	2.8573
SsRbeta		1.54506		1.85477	4.76809				1.83176			1.71888			2.00612
sta	1.89228		2.2734		3.19738	1.85037			5.22313	1.62068
sti	3.48842					1.5994				3.02031	2.50394		2.60669						1.76052
Stim	1.8435			2.32519			4.08483			2.68545	1.70004		1.92096
subdued			4.36959	2.26083		3.50962			1.7903							2.2576				1.62997
Sulf1			1.78233			1.76118	1.68338				1.55079					3.67621				1.56795
Su(var)3-7	2.86412		2.00586	3.03055		1.79381				1.85854	1.85116
sw	1.59255	1.51254	1.89544						1.7191				1.61423		1.59918
Synj		1.85126				2.03606			1.63892		2.33568				1.81995					1.55801
Tango13					1.65536			2.27075		1.5656		3.05615	1.89477		1.65361
Tcp-1eta		2.08443			10.8413	1.81946			3.28633		1.73598			1.71679
tefu	1.56347		2.77411			3.76176					2.03195						2.1903			1.6892
Tg	1.91349		3.17988	4.73262			4.01625	2.57953								5.48725
tna	1.98228		1.58719				2.52543	10.6191	1.58853			5.88901
topi	1.80952		2.90643	8.94045		4.35895		3.25427			2.17978
Tpr2	1.7783						2.79983			1.77695	1.62629		1.70259	1.66605
Trs31	4.68734				2.34758		2.68826	2.29529		4.71503								1.82019
U26	1.79666	1.65797	4.48911			3.74603											1.90532			1.72794
UbcD4				2.1632				2.03293		1.70052		1.67997	3.0971					2.06691
Uhg2		3.71285	4.83785				4.57105	7.94271				4.92762						3.38842
Uhg5	2.6092	3.90313	12.021				6.51253	15.7045				10.5703
unc-119	2.22384	1.73721			4.1072		2.47782	3.56232				2.92247
Unc-13-4B		2.23842	3.35049			1.72853	1.59321										2.19569			1.79181
Updo	1.84417	3.21463	2.17307			2.44106	2.1242				1.75086
Upf2		2.00088				1.75049					1.90541	2.14822			3.23068		2.27967
Upf3	10.4183									8.51457	2.50394		19.0155	4.13586					1.92939
ush	1.90387		2.26641		1.52642				1.592		1.6324				3.01995
VhaAC39-1				4.10625	2.29045	2.54406			1.64349				1.71105		1.51235
vig	1.88578							2.72865		1.56543		2.97845	2.01097	1.83533
Vinc	2.59596					1.78443				2.49322	1.89877	1.82724			12.0322
vir-1		1.7656				1.86943	2.58129	4.09837	1.63598			5.96936
Vps2	3.22815	1.76065	1.88074							2.20371			2.63908	2.10245
Vps24	4.42487	1.7242	1.8957							2.50489		1.88076	2.50649
yata		1.54468	1.83583								1.74475	1.75682				1.68695				1.61869
yellow-f		1.88711	1.935			1.72618			1.67609		1.81418						1.8456
z				7.56048		2.02244			2.28571		1.64331		1.54264		2.36939
zf30C	2.55777	1.94894								2.49078	1.90323	1.88341					2.07772
abo		1.93177				2.53845			1.66968						2.14412		2.50169
Abp1	2.87054	2.28071	2.82136							2.79192				1.64844
ACC			1.53445			2.28985					2.46055					1.61361				2.10679
Ack		2.20361			3.21958	1.72241			1.7184		1.92162
Act42A		1.93265			3.6149	1.96156	1.63771		2.68158
Adam	3.46617		2.59687							2.4045			1.91904	2.4215
ade2	3.67306					1.7298				1.96122	2.12236						1.74616
AGBE		4.40737				2.25018			2.86243		1.57922						1.58665
agt		2.46558					2.97354	2.08599				2.51901						1.89876
Ak6							8.47965	5.93042				7.05275					2.13739	3.28292
alien	2.25487	2.33319	1.68343				2.64166		2.70255
alpha-Cat		1.8623	2.97401				4.12534	2.15926						2.25643
Alr		3.04085	5.14305	1.72613					2.97687						4.6852
AnxB11			2.8606			1.62016	1.95526								4.83513	1.94075
ap				6.44154		1.93188	1.59035	1.79211								1.83003
AP-1gamma			1.76003	1.87405				2.25563				2.01549								1.5433
APC4	2.12832	2.52715	2.89698			2.33958				2.60565
Appl	2.86254	1.77758									2.08068	2.58946	2.22616
asrij	1.71144	2.80741	1.75682															2.47524	2.44602
ast	1.71818		1.6501			2.06762					2.54652						2.14361
asun		1.6448			2.31631	2.57159			2.40913			1.61698
Atf6				3.04652			1.77946	2.03637				4.57522				2.42783
Atg10	3.23016		4.86846				1.90835	1.77533								3.64206
Atg14	1.66559	2.56489							1.93937	2.25486		1.76378
Aven	4.28924	2.73187			3.71165				3.04901				4.37125
bcn92	2.26882							1.93729		1.76205			1.55873	1.78088
betaTub56D		2.21132				2.25281			2.92875			1.86409			4.84414
BI-1		4.17827					2.95574	1.79034	1.82337			2.74386
bip2						2.07682	4.24489	3.18162				5.57923				1.75918
blanks		2.46568					4.27809	7.27038				7.2516		2.82131
BoYb		1.99524				2.34517	2.05743				1.883						2.09106
BthD	4.72457									4.77619			2.16098	2.0115				1.80308
CalpC	2.17423	1.73574	2.31566	7.96916		2.19477
CaMKII			2.91143				2.40362	1.95247				2.60943				1.77071
Catsup		1.76307			2.57038	2.31068	1.60117		2.7112
Cby	5.91767		11.0405				4.26699	5.92787				6.77145
Cchl	5.07871						1.68207			3.20283	2.56596								1.73185
Ccz1	2.02643	1.71115	2.61317				2.9336			2.37797
Cerk		1.79782				1.86942			2.42493							2.09708	1.58196
cerv		2.71162		3.8312	3.3443		2.66242		2.04761
CG10038		2.54252			2.17962		4.05061	1.95829	2.06513
CG10055	2.29656							2.52706		1.58783		3.31202	1.60818
CG10194		1.91261	2.003			2.06344	3.00629								2.06747
CG10264	3.29647			8.4131				6.78957					5.13793			35.0068
CG10307	4.3827		21.9732	12.6483			6.52531	5.51436
CG10375							2.68269	2.12572		1.61859			3.50703	2.1046
CG10418		1.86297					3.28838		2.11814			4.04984						3.51968
CG10462	1.64724		2.13146			1.86081				1.71604							1.64493
CG10550	2.47197		2.48023				3.65824			2.18356								2.91705
CG10585	1.65453	2.00962	1.91226			1.54299				1.69266
CG10914	1.90591			2.85514			1.80915			1.9657	1.88084
CG10915	2.41439			16.1674	1.71181					1.66443			3.31073
CG10984	1.91183		1.71624	2.46486									1.87649						1.98934
CG11107	1.71679		3.32443			1.75049					1.76474						1.70492
CG11168		2.1649	3.71973	4.92482	3.07418				2.12857
CG11486				1.88816	1.80049		2.44771	3.61587				2.95762
CG11593	2.74342		5.36356			1.71892		1.69573								4.19456
CG11671	2.57836							2.51915		2.8197			4.78881					4.42059
CG11737		1.7252			4.85207	2.25218			1.81543						2.03481
CG11902		2.14599	1.97306			1.82315					2.18916						2.12638
CG11906	2.40249		2.33203							2.37254	1.6708		1.81648
CG11964	1.98086	1.71209								1.8287			2.98354				2.14977
CG12007	4.82578	2.73748								3.55899	2.07096		2.67471
CG12014						3.43001					1.85312				2.10918		3.28545		1.58816
CG12025				1.77542	1.89867							3.67277			1.91956	3.38764
CG12042		2.3334			11.823				1.77876		1.83729	1.52445
CG12075	2.36163									2.13403	1.95527		2.62924						1.56335
CG12134		1.65606			3.93346		1.69407			1.8862					3.54418
CG12224		2.48693	5.80625			2.14027	4.58588	4.97013
CG12236	1.58294		1.56156							1.73466			2.12221			1.89416
CG12253		2.26027			3.61976		3.34657	2.58664				2.33785
CG1239	1.74442	2.16411					3.35277	2.86234				2.88441
CG12547				5.33482			3.82243	10.5035				3.08902				4.49109
CG1271	2.22944	2.08915	2.9994	1.98015												6.51771
CG12728			2.77646	1.75385			1.98082	5.56525				2.93656
CG12818	2.61096						2.47729	1.82271					2.36394	2.24474
CG12848	8.35422							1.53303		3.55415			4.12216					4.99331
CG13016		2.55481			4.90649	4.23933			4.02811						5.85716
CG1309		2.04319	2.74941		3.30047	1.67973			2.03642
CG13096	8.84742									2.75954	2.25246		3.44065	3.34399
CG13097	3.50464									2.89425	1.53818		4.15193	2.4679
CG13367	2.99657							2.60374	2.14419	2.35439				3.58385
CG13369		2.61377			2.18481	2.29161									3.12085		2.33977
CG13392					1.99286	4.49959	3.04299		1.64483									2.72924
CG13397						2.51464			1.58867		2.12315					3.1877	1.73253
CG13531		1.95576	2.12542			3.19595					1.85177						2.07322
CG13585		2.37907			2.40021		5.82994		1.97626						3.40025
CG1399	1.76293		3.034			2.1562					1.53427	1.76113
CG14102		2.24352		1.79845				1.9487				2.41596					2.18558
CG14154	3.52955		5.50089		15.6233			3.71984					7.61774
CG1416		2.15861	1.93574				4.84485	1.92288				2.66487
CG14223					5.40208				2.87686			1.90813	1.68201		2.72795
CG14526	2.15274						1.89674		2.43763			2.01517					2.02974
CG14647	1.75818									2.88594	1.71266		1.75661					1.71016
CG14693				4.26221	1.71874		2.38261	1.88805								1.84012
CG14969		3.57035	1.67722				2.72305							1.8359			1.88995
CG14977		1.61331			2.44872		5.44488		2.59119									2.56807
CG15011	2.70089		6.64597			1.6373					1.61073									2.01369
CG15083				15.9277	4.69829	1.89806			1.71802						2.51674
CG15098		2.07623			7.81566	8.43859			2.39608						3.91102
CG15107	4.64431	1.97305								2.34814			4.43938	1.71156
CG1516						2.33599				1.58321	1.82411				1.70812					1.77508
CG1532	1.62297	2.08783	1.68666	1.77699														1.53226
CG15332				8.93883		2.3521				2.07982						4.08251	1.95782
CG15432	5.74746							2.21188					2.76466	3.62112				2.6542
CG15523	1.86694					3.08482			1.5881	1.99749	2.5333
CG15625		2.55003			2.69885			2.36253				3.75802					1.81044
CG1572				2.23182	2.4418	2.48116			2.57991						7.30658
CG15814	1.6726	1.76258	3.28801	5.58266	1.8733
CG16710	11.3746		26.0234				6.94465	4.41252		5.98185
CG16711					3.91327			1.89623	1.76122				1.94226		3.87964
CG16721	1.91393	2.8743	4.47434				1.65782				1.93017
CG17019	1.66573	1.84995								1.63256	1.59493		1.6839
CG1707	2.12258	1.55874	1.53796						2.91103			2.21881
CG17119			2.29407		14.0169	1.6502			2.2559							1.88106
CG17202	2.59808	1.60563			5.08022				1.89128				3.4322
CG17209						1.84269				1.78697	2.13215								1.54726	1.56502
CG17230	3.08929	2.73515								3.90182	2.05551				4.04524
CG17266					2.39318		2.66622	2.78173				8.5709						2.54929
CG17271		1.56328			4.55485				2.8609				1.61844		5.9787
CG17337	1.59891	1.9581	2.13232								1.58274								1.66939
CG17385		1.64628					2.69227	1.96342	2.44262					2.21273
CG1746					1.68962			2.22186	6.72869			2.03474						1.60634
CG1749	3.06844	2.33257		3.33308						2.13093							1.86943
CG17715		1.6094		6.93686			3.07681					1.89559				1.88711
CG18048	1.60316			1.73074			1.69014			2.11297				2.07594
CG1814	1.77685	1.79746	2.80106			1.62103									4.30302
CG18273						2.28893				1.72991	1.94994		1.76746				1.76613
CG1868	2.89933	1.88069	3.1408							1.65097							1.64951
CG1927		2.06557			1.53692		2.45884	1.88735	3.22228
CG1970	2.13398						2.35685			1.88183	1.7099		1.61071
CG2059		2.95301	3.06022		1.60709	1.96954	4.43818
CG2100		2.12478				1.91492	1.64381			1.7014							2.37483
CG2137	6.53468		4.3981			4.2303			2.68241		3.05182
CG2201		1.52696	3.49751				2.51748	1.61636				3.11954
CG2246		1.97045		1.93611	15.7986	2.48048			1.7045
CG2258			2.50504	2.47535	1.81237			1.7646								2.86088
CG2260	2.67527									2.61081	2.11563			2.86713					1.62887
CG2278	2.03942			3.99016	2.88107			2.82337							2.16946
CG2794		1.55672					1.62507		1.83915	1.95536				1.70226
CG2918	2.85217									2.92137	2.35608		3.59656	1.78322
CG2972	3.80953			1.67447						2.36793			2.01041	1.62959
CG30001	3.59398	2.9214	11.8341				2.12851	2.60197
CG30007			3.11539			2.28832	2.64564				1.7579			1.88401
CG30022	1.94413	2.15361	2.28765					1.88567		1.55603
CG3011				2.45307	9.44282	1.65959			1.54935					1.74332
CG30187		2.8926	6.06606			2.00867	2.0947					1.62325
CG30263	4.92528		13.3904				7.48514	8.99902							5.9079
CG30281					3.76867	3.22175	4.68601		2.17996							2.72385
CG30291		1.77201		4.73506						2.64495	1.65444		2.34554
CG30349	1.85979		1.87543								1.62461		1.90096				1.66975
CG30415					2.90347		2.47685		2.10033					10.9577				2.87256
CG30440			1.89101				3.41514	1.89598				3.3084				1.6395
CG30491	2.06921	1.99003	5.7944	4.75255				1.89386
CG31161	7.91055	1.98216	7.55574							5.15396						2.27668
CG31324				2.97183	4.24348		2.39244	1.94103				2.91653
CG31510							2.41713	2.57108				2.47792		1.93689		1.58996
CG31525			6.02973	32.0879		11.0838		4.46711								2.63575
CG31642		1.72871			4.46183	2.47448			1.76158		1.60587
CG31739		1.94417	1.94993			1.91772					2.10627						1.90383
CG3198							1.79021	3.59062				2.73986	1.50411		3.16589
CG32068	2.06889	1.8618					2.77639	2.10363		3.01701
CG32409	4.77635									2.87481	1.58224		3.16505	4.47413
CG32649		1.88727		3.5787		1.80341					1.61185		1.5703
CG32708	2.65692							2.26381		1.73699				2.56922				1.8264
CG32756		1.78341	5.09042			2.05688		2.57996				3.32529
CG32767				3.78582	4.82337			2.74736					1.83709			1.90447
CG32813	2.33653			2.89941						1.97695			2.18962	2.08966
CG32856					2.88743		2.36327	2.48633				2.86121						2.34517
CG3326	5.04115		6.19766					3.05315				4.93623								2.52827
CG33260	2.06446		3.83162		4.33666							1.70577				2.22693
CG33267			15.3586			6.09952		6.86274							14.479	6.10262
CG33288	2.77748		3.53711	3.9617		6.68391										4.18421
CG3337		2.53036		3.00797			3.15688		1.93494									4.40952
CG33641				4.53654	3.94631		4.15532	3.91138				6.57995
CG33969	3.57358	1.94137	3.04279					1.6035									1.95053
CG34125	1.96847	2.4063							2.0147					1.87939				2.20292
CG34228		2.85043			6.67667		4.46283	2.2209										2.11587
CG34232	4.20813				3.78431				2.32382					2.81295		2.24488
CG34409	2.55326		8.22874			4.37328		4.01172							4.38617
CG34422	1.92027									1.91569	1.73237		2.35011							1.94968
CG34449				6.20211	3.64145	1.8535			2.01946						4.95399
CG3645	1.78921	1.75005	2.69392			1.60139											1.91802
CG3680	1.60815	1.73547			1.67761					1.76344	1.79755
CG3773	2.16112						1.71978			2.33953	2.24942		2.44894
CG3817	5.05051						2.05583			2.24821			3.61001	1.73891
CG3857				5.19598		1.70271		1.77646					1.55861			1.8426
CG3860	1.59778	2.26915	2.8555												1.65504					1.65341
CG3918	3.657									2.28171			3.18216	2.5208	2.387
CG3964			2.16041		3.13545	1.95686			2.31272		2.1575
CG40378	7.04298		4.87826		7.12793			5.33938	3.425
CG4038	1.53375						1.76106			1.97393			9.68868					1.64498
CG4199		2.08964		8.19033		1.95798									1.85054		1.71745
CG42239		1.77328					15.3635	2.75764						2.48298				3.89201
CG42445		2.55722					3.49186	3.65209				3.62435		2.0802
CG42666				2.51556	4.06213			2.30985	2.05567			2.30828
CG43188				1.9816	4.93511		1.67641	11.8824				5.01938
CG4332					4.00309		1.88244	1.60593	1.76857			2.76535
CG43337					6.67184		2.69208	5.16046	3.35358			1.64395
CG43672	5.43345		17.4421			4.46776		3.64979								4.43252
CG45049				6.51689	2.52123		2.12399								2.19497	4.02948
CG4729	1.56121	1.73248				1.84342	2.48323		1.72681
CG4925	4.21639									2.94584	1.70648		3.80576	2.25325
CG4970	3.1674		5.37952				4.06371	5.47724				2.37247
CG5009	2.46768	4.67186	2.84663								1.60139									1.90735
CG5010		2.84694						3.08963	2.26578			1.969			6.67985
CG5033	3.10695					1.59691				2.23823	1.8645			2.49069
CG5180		1.75372	2.13544		2.34919				2.20649		1.66322
CG5191		1.85789			3.06983				1.66149		1.88045					2.34684
CG5196		2.12819			1.65676	1.88896			2.03884		1.63011
CG5210						2.8466			2.05589		2.19421						2.83831		1.70324
CG5316					1.75745		2.89301	10.6702				6.76917			1.64565
CG5399			1.71191		1.78161	2.31349			1.9518						1.92984
CG5548	2.75785							1.93729	2.94047					2.14179				2.94081
CG5589	2.25182							4.88119			1.72443	1.80418		2.96183
CG5742				4.38493	2.7253	1.95242										2.82582			1.6784
CG5862	6.82621									6.27958	1.91345		8.82768	1.63936
CG6041			19.2986			4.45619	13.1106	8.23114							4.49788
CG6051	1.88608			1.89644	7.26836				1.89508				1.72368
CG6204		2.18499		2.85392		2.81621					1.64919						1.93662
CG6254	1.73889	2.27336								2.04571	2.02368			3.55884
CG6259	2.60487	1.53809								1.79213								1.68731	1.62967
CG6276	1.79042	2.33007	2.40652									2.16335			1.78561
CG6287					12.5657		3.89312	3.88289		3.61687		3.5159
CG6330		1.93438			2.51201		3.70579	1.78965				2.70475
CG6424	1.63955	1.58677								1.63494			1.56523			1.95505
CG6441	4.05114			4.93425	3.33418	3.70264										5.0719
CG6479					3.1251	1.87162	2.02216		2.79358						2.31238
CG6639	4.74892						5.28739	3.2419		6.46492			2.88279
CG6686	6.12044									4.75954	3.44315		6.4157	2.89228
CG6724	1.67056			1.88115		1.7746				1.72656			1.94069
CG6767					3.17745		3.82802	3.08323				2.22081				1.90945
CG6812		1.92032					2.5514	2.34881				2.58947				4.90227
CG6843	5.35734									2.4403			3.80234	1.64599					1.91028
CG7011		1.98499			4.12572	2.64274	2.14805		2.05917
CG7091			5.22621	2.40442		2.5274		3.20811								6.76781
CG7099		1.72902		5.97201		2.86609					2.40678									1.63229
CG7137	5.59402								2.23614	2.33374			1.95948	4.47396
CG7192			1.92297		2.29013				1.6941						5.4338	4.37789
CG7255			3.8461			2.05758	3.23757	2.957								3.86019
CG7275	2.37969									3.20896			1.55212	2.12221					2.20205
CG7457	2.34313		1.71441							1.77238	1.78873			1.98826
CG7461	1.92495	2.10657					1.66105				1.67134	1.79181
CG7546					1.56569	1.71757			1.71942		1.65056				1.6273
CG7603		2.43737				1.87705								1.77179	3.41522			1.87845
CG7609		1.83843	2.43014						2.0616						1.60733		2.04911
CG7638		1.65852	1.54613			1.699						1.67477					1.61011
CG7712	2.63553						2.90397	1.88197						2.93668				2.14739
CG7806	1.92129	1.57208		1.63271		2.12088											1.87108
CG7857	2.61159						2.33796						2.11952	2.44338		2.54534
CG7922	1.92884	2.03569								1.97859	1.80412		1.58228
CG7945			2.22396		2.52191		1.99325	2.47058				1.97756
CG8005	2.91332	2.09894	2.79785							2.60171			2.11825
CG8121			4.47737	1.86549		1.53494	1.8117		2.58911
CG8132		1.8629					4.25411		3.62114	2.21709								2.22728
CG8260	4.32253		6.21749			4.89075	18.7347	5.21659
CG8270		2.10184	1.74555	2.29677		2.0544											2.29247
CG8273	2.75769									2.06489	1.84341		2.40784	1.77496
CG8336	2.57874	1.88746							1.83745							1.88156			1.84223
CG8366	2.6343	2.38205							1.85294					3.41713			1.98679
CG8545	10.7797									5.01274	2.93211		5.31796	3.45498
CG8552						6.47954			4.33386		2.32943				4.24633					1.70792
CG8596		1.90215	3.23032		9.4353	2.79891			2.45263
CG8675	11.7602									12.1063	3.76514		7.56675						3.6818
CG8679	3.54975						2.05027	2.90788		3.45851			1.95378
CG8735	1.74982	1.80536	2.42077		4.55183				2.79644
CG8777		2.90277	4.40839			2.56918	2.68794										1.93319
CG8833	3.82489									2.78756	2.66174		3.47892	2.80286
CG8866			2.88712	1.92379	11.4066		2.02102									4.67917
CG9003			1.83317		2.48539			2.19846	1.69148			1.66068
CG9005								2.40252		1.62245	1.68438		1.75283			1.78116
CG9067		3.75205					4.24596	8.87104				22.0276						4.68091
CG9086					3.20307	2.32849					1.79895			1.6412	9.00752
CG9123	4.03057		2.73084	2.09978	3.13557								2.05543
CG9140		1.63727	1.704							3.73025	1.82209						1.69938
CG9153		1.73171	3.04241	2.62863	1.59094	1.82882
CG9154	4.24119	2.19995						3.56204		3.14806		1.87989
CG9203	1.9926	2.13987							1.84422		1.51652						1.67791
CG9246	3.60972									1.85535	1.55895		2.201	1.69798
CG9286	3.95932		2.03155				2.19647			2.20702								2.64982
CG9344		1.64243		3.27336	3.94065				2.33362									2.73699
CG9527		2.76821	2.34339			3.3587			2.02384								2.00684
CG9548		2.10242			1.88581			3.65109				2.83598						2.52884
CG9581		1.89006				1.71866			1.84475						1.729		1.7021
CG9590	2.70118	2.16905					2.49395			2.83612		1.9044
CG9669						2.6771	1.84828	2.22482				2.4614						3.97493
CG9754	1.62926									1.97938		1.88305	1.64171	1.60407
CG9799						1.90965			1.62943	1.52581				2.72222			1.90973
CG9902	3.04339		2.58165			1.80376	2.30792	4.45916
cl	3.23082	2.98138					1.69453			2.1173								1.95002
clt	1.92036	1.6771								2.40182	1.52674		2.06093
clu						1.87576			1.74926		2.10678			1.63641						1.75022
Cortactin	2.26468									2.52268	1.82992		3.41286		1.70622
Cp110	1.82591		2.2966			2.4416		1.71216		2.12739
cpa	2.60499								1.54154	1.9637		1.67184	2.27971
Cpsf100	2.77927						2.12625			3.48122	2.18153		2.31671
CR32385					1.90457	2.0697	3.22178	4.68537								3.17917
CR33963				6.69882	1.67073		2.98386	6.29519					1.61113
CR41440			4.25144	2.55288		2.05631		2.35162							2.71541
CR43301				7.32064			5.09172	14.0253				6.72766				8.26423
CR43334							3.15959	5.72754				2.32569	2.52335			1.7819
CR43459				1.55834		2.42677	3.9519	6.1213								2.70123
CR43626							27.4035	21.1707				4.02695				1.89865		3.10464
CR43650				2.10307			8.79102	14.0947				3.23156						2.13023
CR43656			5.49459				10.6206	6.59451						6.38923				5.6195
CR43963					5.72238		4.02977	12.8385	2.72138				2.68733
CR43974				5.86132			7.02192	7.10256				2.34393				3.34514
CR44020			4.53697	8.64445			10.2306	3.79466								3.2113
CR44417							1.80767	2.21046					1.55968	1.98781				2.68812
CR44977	4.5477		3.33949	22.0375		5.01664		2.82572
CR45048			6.11432	7.7352		2.2354		7.04976								1.80565
CR45054			1.86154				7.68543	3.11801					1.89034			2.13894
CR45600			3.64292	4.04813				3.0891							6.13558	11.5822
Crc	8.40566									4.25807	2.22584		3.97059	3.95613
CrebA				3.33823	3.03599			6.74632	1.66462			6.35737
crol					3.51419			2.40964	2.16989			3.07839				1.77361
crp				1.98286				2.66098				2.76622	1.7016		1.64563
Crtc					1.78833			3.82752	2.17534			3.35352	2.05066
CSN1b	2.23788	1.92729										2.21635		1.95647						1.54082
CSN4	1.84103	1.81206					2.1299			2.82984							2.07151
cta			1.89344				2.96542	1.66458				2.88414				2.59355
cv-d					8.09864	3.15785			3.30058		2.80517						1.92002
Dab						2.06868				1.62646	1.72341				2.04147					1.72051
Dhc62B	5.21169		3.44559			3.55311							2.25707			6.39539
didum	3.03967		3.22192								1.5829		2.10683			3.06074
DIP2		1.54711	2.17124			1.98804					1.61622									1.74109
Dip-B		2.75884				2.10377					1.97464				2.76868		1.5852
Dpck		2.51426					2.1497	2.19995				1.90791						2.50415
Dph5	2.34689				7.19517				1.82647	2.21386	1.81441
DUBAI		1.97117			2.63063				1.78946		1.93261	1.74671
Dyrk2					2.117			1.61866				2.15567			2.26477	2.00064
ea			3.46348			2.58974	2.1394		2.91275		2.7159
Eaf			1.76628	2.11078	1.84731				1.64992						2.25063
eca	1.98349	1.51722			5.51472				3.27086	1.6332
Ect3	2.46765		3.06827			2.6465	1.99883	1.98097
Ef1beta	2.47842	1.85321							2.28955	2.40576				2.67925
egg	1.95086					1.5745				2.35054	1.86556		2.35934
eIF2B-alpha	2.51926	3.49657	6.66016		26.0241		2.34854
eIF2B-epsilon		2.17812	2.00128			1.93926					1.92696								1.57399
eIF-2gamma		1.67748			1.83636			2.44429	5.9943			4.93331
eIF-3p40	2.32058		1.68596		1.74175				2.20874	1.80609
eIF4E-6		2.75967					8.82425	7.25747				6.15654						2.78273
eIF5B	5.39508									2.83284	2.8067		4.80768	2.53521
ema		1.70605	2.43152	1.62489		1.90512											1.65237
Etl1	3.02493	1.68277	2.12133													1.57127	1.71733
Ets96B			7.21187		42.2905	4.51324			3.77715						4.28795
ex				3.11431	2.03168	1.63263			2.27432						3.41173
Fas1				4.24754	3.57031				1.6375						2.79174	2.44707
Fas2			4.50717	5.012			2.97863	4.26687							5.02324
f-cup	3.01191		4.26858		2.92966					2.28957							2.12313
fd68A					4.04369			2.67295	3.72216			2.60801			3.68495
Fer1HCH		2.8684			2.06786		3.51102							1.59013	1.84067
Fer2LCH					1.63718	1.62036	1.69664	2.6236							2.37288
fok	1.83888	2.2712		1.84849								2.46114		3.61043
fry	1.87129		2.25021			2.67867					2.04236									1.71638
fuss			3.0116	3.21229	2.64055	3.11202	2.0778
fws	2.23606	1.83377								1.52483	1.56846						1.59182
GABA-B-R2	2.98427		8.29256			3.13347		2.05296	2.06162
Gcn2	1.71147	1.7195	2.49584			5.03159														1.75962
Gfat2		2.07365				2.54278			1.58076		1.55927				2.04559
gish			1.66726	3.9824			2.37029	2.33091				2.9092
glec				1.93158	1.95101			2.56348				2.15129			2.12559
Glg1	2.0879	1.95431				1.75217					2.08479						1.82332
GstD2				8.36476	5.29775		10.2823	4.07937								6.66533
Gyc88E	3.99059		6.35819	4.90446				4.49367								8.98507
Gyk		2.24287	1.66428			1.6868			1.6284								1.92039
HIP-R					1.86363		2.77303	4.99893				3.87671		2.00665
HmgZ	2.1809							1.76066		1.66408			2.21398	2.10152
Hmu				3.19546	1.59415	2.56225			2.285						4.24791
hoe2					4.98606	2.6903	3.96918					2.06526			4.05371
Hr96	2.51061	1.59464	2.20291								1.83411						1.78512
hts	1.56268			8.93549			1.60108					2.3894		2.17562
Idgf3						2.72827	1.55943		2.20069		2.29081						2.26973
ik2		2.86977	2.48425								2.49175		2.74008						2.25039
inaD	1.62957		6.18842			4.59775		3.90668							5.88913
Inos		2.01046	1.75958			1.94389			1.95897											1.64906
IntS1						2.5845			2.0906		2.09386						2.0709			1.80221
Ir51b	5.86774		7.35377			3.09369	3.55107	3.78782
ird1			1.9697		1.62095	2.36484				1.74568	1.86775
Itp-r83A	1.91153		2.21941			2.90552					2.04785									1.84422
Jheh2		2.24663	2.36107		4.38962	1.79203	1.97539
Jwa		2.05957		8.99911		2.92591			1.72293					1.80857
Kap-alpha1		1.70626		2.54207	2.59496	1.8789					1.7879
kat80		2.33318	1.98225					1.82502	2.13391		1.77517
Kdm4A	1.76053		3.06952				2.70074			1.60895		1.80536
Khc	2.04003							2.57609		2.02758		2.76372	1.80064
Khc-73	1.57442		1.96185			1.7705										3.98269				1.54578
klar	2.37801		2.08356				1.67498			1.86715			1.69428
koko		3.90444	1.9017		8.64849	1.66073									13.1497
krz				2.58035			1.60534					2.27623	2.93418			1.86643
kto									1.88567	1.52602	1.87194		2.38586							1.80327
l(1)G0020	4.04643									2.93226	2.53779		1.97402	2.09179
l(2)01289			3.89643		6.96357		2.87595	4.12337								2.89065
l(2)34Fd	2.13637									2.32781			2.21381	1.73416					1.64467
l(2)35Cc	1.7968			3.79823			2.40875	1.97045	1.76111
l(2)37Bb							1.89533	1.8327		1.62377		3.30822						1.92172
l(2)gl			2.41649	2.05086		1.80153	2.08367									1.67589
l(2)k01209		1.62431	1.86218		1.61595	2.31659			2.59989
l(3)j2D3	3.28099						1.64014	2.28198					4.53763			1.59451
lama		2.05518	2.28954								1.59854				1.89548	5.54071
LanA	1.66443					2.15				1.63974	2.35349									1.55771
lap			2.18298	2.23892				1.72579				2.07398				2.55755
lgs						1.73347			2.34608		2.17288			2.05232			2.20779
LIMK1	1.63189			2.68252						1.6133		3.00833				2.15608
Liprin-beta		1.83457								1.86755	2.11115				1.6906		1.61083
lkb1	1.82449	1.55395								1.85469	1.95425		2.20719
Lnk		1.92539	2.03013	3.8645		1.61868					1.88209
lqfR			1.74093	15.4959		5.22091						1.50369			3.7314
lute									1.73337	1.73187	1.53855	2.27827				1.85122
mal	1.90338	2.21969				1.61259			1.64965		1.62839
Mal-B2	2.13498		3.34723	3.12137		2.19955											2.22167
Marcal1	1.95412	2.23237							1.98177					1.97328		2.3073
Mcm5					11.6072	2.28535			1.9886	1.61535									1.83282
MED10	2.12355						2.75391			1.87758				1.77975				2.5553
MED31				5.08676	2.33443				2.04034						2.28777			1.87461
MESK2		1.77493		1.97039			2.09092	2.24808				2.04122
mgl				2.29337	4.32818		1.75747	2.66575				2.0573
Mical	2.45047		2.01077	2.30159						1.81189										1.60999
mip130	5.04507		2.04889							2.7139	2.01686		2.85288
miple2	3.18616								1.73001	2.67147	1.60337			2.13954
Mitf			2.83803		1.95041		2.32938	1.80008				3.71613
MKP-4			1.93686		4.01106	1.75315			1.61963							3.73336
mle	1.74432					2.03187				1.72544	1.61154		1.64946
Mob2					13.1937			3.56856	2.82139			2.36706	1.57723
mon2		1.75976				4.68317					2.401						2.26992			1.975
mri	2.12738	2.87011	3.34119								1.65522			1.86113
MRP			3.38256			3.9967									2.61312	1.6157				1.85283
mRpL19	2.26454				1.84772		1.62012			1.94557			2.5125
mRpL28	1.96961	1.63287								2.4829	1.8996		2.86879
mRpS18C							3.2333		2.57302					13.1949				2.08022	1.97563
msl-1	3.19727			2.58714			1.82851			2.21236			1.92487
mthl3			2.3785		3.64039	2.24845		2.48378				2.05492
mthl4			3.75445		3.73317	2.9173		2.48726				1.67482
MtnD							3.39941	4.21709				4.53633		2.00721				4.5463
Mtr3	2.88968	1.99913								2.82502		1.77923						1.91764
mtTFB2		2.21741			8.64949	3.74565			3.38623								2.07928
mus301			1.96968	2.26087		2.29273					1.97082						1.79035
nAChRbeta2			13.4951	6.4493		6.83804		2.79718								4.76438
NaCP60E	1.71788		3.09828			2.80067			1.74878							2.7881
Nak						1.70653	1.65256					2.04628			1.885	3.48303
Nc73EF		1.63015	1.85841			2.38064			1.75732			2.29294
nct			3.24935		1.71328	3.09241			1.67753						1.57643
NDUFA8	2.16746	1.52545	2.10106							2.27536								2.16227
Nedd8	2.56256						1.74778	1.93946		2.00738								2.04972
nemy				1.58596	1.94429	1.71342									2.41319	2.82468
NiPp1		1.67692	2.49497				1.62252		3.03152		1.59389
Nipped-A			1.69374			2.8869	3.10373		1.76084					1.80669
nmdyn-D7		3.10024	1.82092	2.5839										1.79432				1.66673
nmo					2.91853			3.52066				4.41023			1.81955	2.89021
Nmt	1.80484	2.16999			1.68362		2.01289										1.56068
Nnp-1	5.04339									3.01384	1.90884		1.96033	1.78085
nocte	1.65818									1.58336	1.64711		2.02771							1.82366
norpA	2.31157			2.37241				2.92431					2.10368		2.468
Nrk	2.32124		4.39449	2.67982				1.72904					2.30525
Nrx-IV			3.89444	8.51933		2.78393	2.13901									1.5204
Nup205	1.65561					2.29718			2.87093		2.38424						1.90538
Nup93-1		1.65631		4.21062		2.35201					1.67503						1.64773
Nurf-38		2.24898			2.9682				2.84892					1.61528					2.05397
Oatp74D			1.84767			1.86459	1.81461	2.06881				3.9443
osk			4.49196	6.07072			5.23402	3.59631								2.79744
oys				1.86609		2.52708	1.72204		1.68055						1.67286
p		2.09094					1.80765		1.89039		1.61411			1.82686
P5CDh1			2.64133			1.77095						1.76622			1.58565					1.69747
Parp		2.12753					10.5546	1.69074				4.74264					1.70064
Pcmt		2.00481						3.50153	1.65287			4.37643						2.15168
Pdfr			3.9362			2.44174		2.47016							5.36912	12.4611
Pex6	1.71882									2.19181	1.91354			2.07682					2.64339
Pgam5		3.03603			2.0739							2.51409			2.02543		1.86394
pgant5	1.97847		1.93495	1.69095								2.85153				1.65925
PGRP-LE	2.19621		5.68896	8.66556	2.71031			3.29879
PH4alphaEFB	1.60215	2.76917	1.81536								1.57642		1.56286
PhKgamma		1.79813	2.37962	2.7337	4.39502											2.13622
Phm	2.29112	2.12401	1.73724							1.8767							1.74802
pkaap		2.22742		1.99978	2.10126		1.67941					1.94353
Pkc98E	1.76695		2.92053		2.05958			5.81728				2.71424
pncr013:4				2.77922	3.66782		1.62184					2.48604				1.80091
POSH		1.88304	2.24816			1.63539			1.87467						2.33198
Prp19					1.77343	1.59604			2.24001			1.76583			1.84239
Pten			2.21883		3.14818		2.92449	1.91589				6.41016
pyd3	2.46725		3.1295				2.71824	2.36578									2.09972
PyK		4.1587					1.91769		2.45206		1.70981	1.77001
Rad23		1.51364	2.2894			2.80632	3.14726		1.90011
Rad9		2.85781	2.06929		3.27269				2.10712		2.082
Rae1	2.17975	1.85088				1.61888				2.02699	1.93418
Ranbp11	1.82261					2.54579				2.2783	1.85706						1.77604
Rbf			2.04872	1.70592	2.12153				1.66233			1.68071
Rbp1			2.83383			1.61341							1.56016			3.71273		1.82026
rgr			2.02645								1.85824			1.65998			1.80319		1.66363
RhoGAP102A			2.27509				3.18898	3.26829				3.33769				2.36404
[truncated: 4,733 more rows]
