# Supplementary material for: Extensive cross-regulation of post-transcriptional regulatory networks in Drosophila
Source: Genome Res. 2015 Nov;25(11):1692–702. doi: 10.1101/gr.182675.114 (PMC4617965; doi:10.1101/gr.182675.114)
Supplement: Supplemental Material [file supp_gr.182675.114_SuppTable_5_-_Spliced_Gene_Enrichment.xlsx]

## Sheet: Sheet1
RBP	Spliced Gene Enrichment	Single Exon RBP Targets	Total RBP Targets
Srp54	8.85526e-69	51	1905
U2af50	3.95719e-34	101	1866
Upf1	1.10677e-28	134	2077
Rm62	3.74909e-28	84	1559
CG6227	3.42585e-25	13	639
B52	2.02724e-17	200	2384
mub	3.8099e-17	65	1104
Rbp1	4.18201e-17	131	1751
ps	1.05397e-14	142	1781
qkr58E-1	4.41277e-11	149	1724
tra2	5.20728e-11	84	1126
qkr54B	4.45731e-10	120	1429
elav	4.5219e-10	159	1775
Fmr1	1.3702e-09	63	880
SF2	6.46107e-09	137	1538
msi	1.85221e-08	83	1034
snRNP-U1-70K	6.60489e-08	44	642
SC35	3.82286e-05	125	1272
CG17838	0.00401732	195	1726
Cbp20	0.909697	90	601
