# Supplementary material for: Extensive cross-regulation of post-transcriptional regulatory networks in Drosophila
Source: Genome Res. 2015 Nov;25(11):1692–702. doi: 10.1101/gr.182675.114 (PMC4617965; doi:10.1101/gr.182675.114)
Supplement: Supplemental Material [file supp_gr.182675.114_SuppTable_6_-_All_RBP_Pairwise_Transcript_Overlaps.xlsx]

## Sheet: allPairwiseOverlaps.csv
RBP1	RBP2	Hypergeometric.P.Value	Overlap	numRNAs1	numRNAs2
Rm62	B52	0	966	1318	2054
Rm62	SF2	0	782	1318	1333
B52	SC35	0	857	2054	1084
B52	SF2	0	1156	2054	1333
SC35	SF2	0	747	1084	1333
B52	tra2	3.23439e-296	728	2054	1003
qkr54B	qkr58E-1	7.18294e-294	711	1257	1495
SF2	tra2	1.13935e-278	588	1333	1003
Rm62	snRNP-U1-70K	2.64864e-263	396	1318	491
Rm62	U2af50	1.63244e-253	699	1318	1536
SC35	tra2	1.35332e-249	511	1084	1003
Rm62	tra2	2.70655e-249	559	1318	1003
CG6227	Rm62	5.63964e-247	373	462	1318
Rm62	SC35	3.55235e-240	573	1318	1084
B52	Srp54	1.23961e-231	914	2054	1696
snRNP-U1-70K	SF2	6.62807e-223	370	491	1333
Rbp1	Upf1	9.87802e-208	707	1385	1705
snRNP-U1-70K	B52	4.71889e-198	410	491	2054
Rm62	Upf1	7.98697e-194	671	1318	1705
Rm62	Rbp1	2.9618e-189	595	1318	1385
Rm62	Fmr1	3.59735e-188	411	1318	694
U2af50	Rbp1	8.05586e-182	638	1536	1385
Fmr1	Upf1	1.16018e-179	451	694	1705
U2af50	Srp54	2.7892e-173	705	1536	1696
CG17838	qkr58E-1	6.5927e-170	646	1514	1495
snRNP-U1-70K	tra2	1.98224e-160	287	491	1003
snRNP-U1-70K	SC35	2.03991e-145	283	491	1084
U2af50	Fmr1	4.67451e-143	394	1536	694
B52	Upf1	1.09069e-141	794	2054	1705
CG6227	U2af50	7.74477e-141	311	462	1536
Rm62	Srp54	2.90909e-138	598	1318	1696
Srp54	Upf1	9.77674e-137	698	1696	1705
U2af50	Upf1	5.64596e-133	651	1536	1705
Rbp1	ps	1.03201e-131	582	1385	1579
tra2	Upf1	1.19092e-125	492	1003	1705
CG6227	B52	1.00609e-124	334	462	2054
Rbp1	mub	4.30475e-121	423	1385	960
Fmr1	Rbp1	6.4918e-108	336	694	1385
Rbp1	tra2	5.97392e-107	415	1385	1003
SF2	Upf1	5.16883e-106	556	1333	1705
CG6227	snRNP-U1-70K	4.10457e-101	166	462	491
CG17838	qkr54B	1.71512e-99	489	1514	1257
U2af50	mub	4.71019e-99	417	1536	960
CG6227	Srp54	5.17369e-98	281	462	1696
B52	Rbp1	1.6811e-90	612	2054	1385
mub	ps	4.0476e-82	398	960	1579
CG6227	SF2	9.52882e-82	234	462	1333
Rbp1	SF2	2.00254e-78	446	1385	1333
Fmr1	B52	1.25696e-77	368	694	2054
CG17838	Upf1	3.56124e-75	548	1514	1705
U2af50	B52	6.37593e-71	618	1536	2054
Fmr1	SF2	9.95022e-71	281	694	1333
snRNP-U1-70K	Upf1	2.44527e-66	253	491	1705
Rbp1	Srp54	8.95702e-66	496	1385	1696
snRNP-U1-70K	Fmr1	1.10181e-65	161	491	694
CG6227	Rbp1	3.20773e-62	214	462	1385
tra2	CG17838	1.12774e-59	361	1003	1514
CG6227	tra2	1.9177e-57	176	462	1003
snRNP-U1-70K	U2af50	9.45971e-56	225	491	1536
SF2	Srp54	1.59515e-55	462	1333	1696
Fmr1	tra2	1.08811e-54	218	694	1003
snRNP-U1-70K	Srp54	1.4782e-53	234	491	1696
Fmr1	Srp54	2.00465e-53	293	694	1696
snRNP-U1-70K	Rbp1	5.04126e-53	209	491	1385
Srp54	qkr58E-1	1.38151e-52	494	1696	1495
CG6227	Upf1	4.48623e-51	222	462	1705
SC35	Upf1	7.14134e-49	388	1084	1705
Rbp1	SC35	1.03051e-47	336	1385	1084
Srp54	tra2	2.04539e-45	359	1696	1003
qkr54B	Upf1	2.74722e-44	420	1257	1705
tra2	qkr58E-1	2.84106e-44	328	1003	1495
B52	qkr58E-1	2.63585e-42	539	2054	1495
CG6227	SC35	4.93017e-41	160	462	1084
CG6227	Fmr1	3.30307e-40	125	462	694
Cbp20	CG17838	6.75975e-40	213	547	1514
U2af50	SF2	3.44682e-37	390	1536	1333
U2af50	tra2	2.85304e-33	309	1536	1003
Rbp1	qkr54B	6.29825e-33	337	1385	1257
mub	Upf1	1.4623e-32	320	960	1705
SC35	Srp54	5.32465e-32	347	1084	1696
elav	msi	1.51341e-31	295	1609	917
SC35	qkr58E-1	2.92224e-30	313	1084	1495
Rbp1	qkr58E-1	5.19769e-30	374	1385	1495
U2af50	ps	1.0504e-29	420	1536	1579
Srp54	msi	8.07643e-29	299	1696	917
B52	CG17838	7.99371e-28	501	2054	1514
SF2	CG17838	1.3677e-27	360	1333	1514
SC35	CG17838	3.95913e-24	299	1084	1514
Rbp1	CG17838	6.59105e-23	356	1385	1514
Fmr1	SC35	1.08956e-22	169	694	1084
Srp54	mub	1.28958e-22	292	1696	960
qkr58E-1	Upf1	2.25007e-20	405	1495	1705
Rm62	mub	2.35648e-19	234	1318	960
Srp54	CG17838	3.3647e-19	403	1696	1514
Cbp20	qkr54B	4.22008e-19	150	547	1257
Cbp20	qkr58E-1	1.05543e-17	165	547	1495
ps	qkr58E-1	1.32263e-17	371	1579	1495
ps	qkr54B	5.35208e-17	321	1579	1257
ps	Upf1	8.5295e-17	409	1579	1705
msi	qkr58E-1	1.66664e-16	239	917	1495
Fmr1	mub	1.28741e-15	139	694	960
Rm62	CG17838	1.4968e-15	317	1318	1514
Fmr1	CG17838	1.57886e-14	189	694	1514
mub	qkr54B	1.18213e-13	208	960	1257
SF2	qkr58E-1	6.44848e-13	306	1333	1495
elav	ps	5.8085e-12	369	1609	1579
CG6227	mub	1.43767e-11	95	462	960
tra2	qkr54B	6.45458e-11	205	1003	1257
Cbp20	SF2	9.82249e-11	133	547	1333
tra2	mub	1.28684e-10	165	1003	960
Cbp20	SC35	1.33327e-10	114	547	1084
U2af50	CG17838	2.34909e-10	335	1536	1514
snRNP-U1-70K	CG17838	2.70281e-10	133	491	1514
U2af50	SC35	1.49921e-09	250	1536	1084
Cbp20	tra2	2.38266e-09	104	547	1003
CG17838	ps	3.04523e-09	337	1514	1579
Srp54	ps	1.1332e-08	368	1696	1579
Srp54	qkr54B	5.1003e-08	299	1696	1257
CG17838	msi	1.4686e-07	206	1514	917
U2af50	msi	1.82108e-07	208	1536	917
U2af50	elav	8.63875e-07	332	1536	1609
Cbp20	B52	1.21845e-06	167	547	2054
SC35	qkr54B	3.39841e-06	196	1084	1257
Fmr1	ps	4.39593e-06	162	694	1579
Cbp20	Upf1	7.84054e-06	140	547	1705
snRNP-U1-70K	qkr58E-1	8.28297e-06	115	491	1495
Rm62	qkr58E-1	9.82394e-06	266	1318	1495
CG6227	qkr58E-1	1.71654e-05	108	462	1495
mub	qkr58E-1	2.08652e-05	200	960	1495
Cbp20	Rbp1	4.08276e-05	115	547	1385
CG6227	msi	4.5049e-05	72	462	917
B52	mub	5.77186e-05	260	2054	960
msi	ps	0.000145598	196	917	1579
U2af50	qkr58E-1	0.000219181	294	1536	1495
Srp54	elav	0.000427549	341	1696	1609
msi	mub	0.000949187	123	917	960
elav	mub	0.00107977	201	1609	960
Rm62	ps	0.00187755	261	1318	1579
SF2	qkr54B	0.00350078	212	1333	1257
B52	qkr54B	0.0052042	313	2054	1257
Rm62	qkr54B	0.013672	204	1318	1257
CG17838	elav	0.0194142	290	1514	1609
Fmr1	qkr54B	0.0212645	112	694	1257
elav	qkr58E-1	0.0302333	284	1609	1495
CG6227	qkr54B	0.0617306	74	462	1257
msi	qkr54B	0.0676879	139	917	1257
SC35	mub	0.072706	126	1084	960
U2af50	qkr54B	0.106648	223	1536	1257
CG17838	mub	0.165864	167	1514	960
snRNP-U1-70K	ps	0.217123	90	491	1579
tra2	ps	0.22302	179	1003	1579
elav	qkr54B	0.248517	226	1609	1257
CG6227	ps	0.293391	83	462	1579
SF2	mub	0.340297	142	1333	960
Cbp20	ps	0.412168	95	547	1579
Fmr1	qkr58E-1	0.447149	113	694	1495
snRNP-U1-70K	mub	0.498337	51	491	960
B52	ps	0.540877	347	2054	1579
CG6227	CG17838	0.575738	74	462	1514
SC35	ps	0.67109	179	1084	1579
SF2	ps	0.793604	216	1333	1579
Cbp20	Fmr1	0.809442	36	547	694
B52	msi	0.891257	188	2054	917
Cbp20	snRNP-U1-70K	0.8971	23	547	491
snRNP-U1-70K	qkr54B	0.930105	56	491	1257
CG6227	elav	0.955638	67	462	1609
Rm62	msi	0.990945	107	1318	917
Rbp1	elav	0.994645	207	1385	1609
snRNP-U1-70K	msi	0.999489	29	491	917
Rbp1	msi	0.999903	100	1385	917
SC35	msi	0.999914	74	1084	917
Cbp20	elav	0.999919	64	547	1609
elav	Upf1	0.999951	241	1609	1705
snRNP-U1-70K	elav	0.999952	55	491	1609
B52	elav	0.999965	296	2054	1609
tra2	msi	0.999999	59	1003	917
tra2	elav	1	118	1003	1609
Rm62	elav	1	163	1318	1609
SC35	elav	1	127	1084	1609
Cbp20	Srp54	1	52	547	1696
Cbp20	mub	1	20	547	960
Cbp20	Rm62	1	34	547	1318
Cbp20	U2af50	1	43	547	1536
Cbp20	CG6227	1	3	547	462
SF2	elav	1	151	1333	1609
Fmr1	msi	1	25	694	917
msi	Upf1	1	99	917	1705
SF2	msi	1	65	1333	917
Fmr1	elav	1	53	694	1609
Cbp20	msi	1	10	547	917
