# Supplementary material for: Extensive cross-regulation of post-transcriptional regulatory networks in Drosophila
Source: Genome Res. 2015 Nov;25(11):1692–702. doi: 10.1101/gr.182675.114 (PMC4617965; doi:10.1101/gr.182675.114)
Supplement: Supplemental Material [file supp_gr.182675.114_SuppTable_9_-_GO_Term_Enrichments.xlsx]

## Sheet: Hotspot Enrichment
Adjusted P-value	P-value	Number of term in set	Number of term in expressed Genes	GO Term
Biological Process
0.000662906	7.2212e-07	23	201	nuclear mRNA splicing, via spliceosome
0.000875254	1.90687e-06	39	494	neurogenesis
0.0116434	3.80504e-05	5	12	mRNA catabolic process, nonsense-mediated decay
0.057494	0.000250519	7	36	proteasomal ubiquitin-dependent protein catabolic process
0.102327	0.000557338	10	80	protein folding
0.140837	0.000920502	4	13	visual behavior
0.140837	0.000940646	5	22	RNA interference
0.140837	0.00118173	7	46	translational initiation
0.425528	0.00417185	7	57	regulation of alternative nuclear mRNA splicing, via spliceosome
Molecular Function
0.0147894	5.09978e-05	15	126	RNA binding
0.0450817	0.000310908	8	48	translation initiation factor activity
0.0515606	0.000533386	16	172	mRNA binding
0.0515606	0.000709336	8	54	unfolded protein binding
0.168437	0.00290409	4	17	chaperone binding
Cellular Component
0.00563983	2.34993e-05	5	11	proteasome regulatory particle, base subcomplex (sensu Eukaryota)
0.00797315	6.64429e-05	10	62	spliceosome
0.00797315	7.40188e-05	6	21	proteasome regulatory particle (sensu Eukaryota)
0.0420923	0.000701539	45	778	cytoplasm
0.0923753	0.00192449	21	292	microtubule associated complex
0.0967984	0.00241996	58	1137	nucleus
0.300843	0.0087746	4	23	Golgi stack
0.386424	0.0128808	3	14	eukaryotic translation initiation factor 3 complex
0.479737	0.0179902	2	6	COPII vesicle coat
0.479737	0.0179902	2	6	ER to Golgi transport vesicle

## Sheet: Protein Partner Enrichment
Adjusted P-value	P-value	Number of term in set	Number of term in expressed Genes	GO Term
Biological Process
5.59078e-40	1.99244e-43	58	201	nuclear mRNA splicing, via spliceosome
2.82853e-11	2.01606e-14	18	57	regulation of alternative nuclear mRNA splicing, via spliceosome
2.66146e-07	2.84547e-10	42	494	neurogenesis
0.00977757	1.39381e-05	18	190	mitotic spindle organization and biogenesis
0.0311718	5.55449e-05	5	15	RNA splicing
Molecular Function
1.43895e-14	9.13037e-18	31	172	mRNA binding
1.41468e-10	1.79528e-13	23	126	RNA binding
2.13724e-09	4.06835e-12	20	106	actin binding
2.13724e-09	5.14113e-12	24	161	nucleotide binding
1.41599e-07	4.49235e-10	12	41	ATP-dependent RNA helicase activity
0.00193777	7.37729e-06	25	351	nucleic acid binding
0.0138262	6.14108e-05	7	38	structural constituent of cytoskeleton
0.0138262	6.77176e-05	5	17	RNA helicase activity
0.0329363	0.000188088	30	557	ATP binding
0.0498401	0.000316244	4	13	actin filament binding
0.0498401	0.000322455	5	23	mRNA 3'-UTR binding
0.0848482	0.000646052	3	7	poly-pyrimidine tract binding
0.0899507	0.000741979	2	2	long-chain-3-hydroxyacyl-CoA dehydrogenase activity
Cellular Component
9.28228e-19	1.49473e-21	24	62	spliceosome
2.04323e-08	6.58047e-11	9	15	snRNP U2
1.33994e-07	6.47316e-10	7	9	Arp2/3 protein complex
1.41395e-07	9.10757e-10	12	40	small nuclear ribonucleoprotein complex
0.00027886	2.24525e-06	59	1137	nucleus
0.00377253	3.64496e-05	5	14	snRNP U5
0.00439061	4.94916e-05	4	8	chaperonin-containing T-complex
0.00802871	0.000103429	3	4	lamellipodium
0.0616559	0.000893564	2	2	fatty acid beta-oxidation multienzyme complex
0.0822771	0.00132491	3	8	nuclear speck
