# Supplementary material for: Extensive cross-regulation of post-transcriptional regulatory networks in Drosophila
Source: Genome Res. 2015 Nov;25(11):1692–702. doi: 10.1101/gr.182675.114 (PMC4617965; doi:10.1101/gr.182675.114)
Supplement: Supplemental Material [file supp_gr.182675.114_SuppTable_10_-_Protein-RNA_Interaction_Overlap_with_P-value.xlsx]

## Sheet: Sheet1
RBP	PPI_RNA_Overlap	num_PPIs_expr	num_PPIs	hypergom_p_val	rbpHits		negative natural log of p-value
B52	24	37	37	2.63191e-08	2054		17.453
CG17838	11	20	20	8.09562e-05	1514		9.4216
CG6227	2	3	3	0.00711902	462		4.94499
tra2	3	7	7	0.0312229	1003		3.4666
ps	8	24	24	0.0385385	1579		3.2561
qkr58E-1	7	22	22	0.0505532	1495		2.98473
U2af50	7	22	22	0.0573301	1536		2.85893
Rm62	3	7	7	0.0635552	1318		2.75585
snRNP-U1-70K	3	24	24	0.129999	491		2.04023
mub	1	2	2	0.195468	960		1.63236
Srp54	5	19	19	0.255162	1696		1.36586
Fmr1	4	35	35	0.261835	694		1.34004
Upf1	2	6	6	0.302912	1705		1.19431
qkr54B	1	3	3	0.352626	1257		1.04235
elav	2	10	10	0.536383	1609		0.622908
msi	1	10	10	0.645348	917		0.437966
SF2	1	8	8	0.709372	1333		0.343375
Cbp20	0	8	8	1	547		0
SC35	0	5	5	1	1084		0
						Fisher Method Test Statistic	114.322
						Fisher Method P-Value	1.43289e-09
