# Supplementary material for: Extensive cross-regulation of post-transcriptional regulatory networks in Drosophila
Source: Genome Res. 2015 Nov;25(11):1692–702. doi: 10.1101/gr.182675.114 (PMC4617965; doi:10.1101/gr.182675.114)
Supplement: Supplemental Material [file supp_gr.182675.114_SuppTable_11_-_RIP-protein_and_DPiM_interactions.xlsx]

## Sheet: IP-MS Interactions
RBP	Interacting Proteins
CG8636	Int6	Rm62	RpS3	CG17838
qkr58E-1	lark	l(3)72Ab	YT521-B	CG2807	CG11107	Prp8	CG16941	CG10077	CG4612	U2A	CG13298	fl(2)d	l(1)10Bb	CG7028	Rm62	qkr58E-3	qkr58E-2	Upf1	SF2	CG17838	RpS3	SC35
SC35	RpS3	Upf1	CG17838	qkr58E-2	qkr58E-3
Syp	Vap-33-1	YT521-B	CG10209	CG3793	CG7206	l(3)neo43+MRG15	CG6712	OstStt3	mTerf3	Vha55	CG7518	Ras85D	Mat89Ba	rept	CG6340	how	Rm62	Upf1	RpS3	qkr58E-3
elav	CG14786	CG9684	CG11337	CG4612	Rbp9	Rm62	Upf1	U2af50	RpS3	qkr58E-2
SF2	RnrS	Pp2A-29B	SRPK	tws	AP-2alpha	Upf1	Rm62	RpS3
tra2	CG3335	Tep4	Cbp80	rig	Srp54	qkr58E-2	qkr58E-3
Cbp20	CG8258	Ars2	Tcp-1zeta	Cctgamma	T-cp1	Prp8	l(3)72Ab	RpS3
B52	CG4849	Moca-cyp	CG13900	CG2807	CG31368	CG6197	CG8833	pea	CG3605	ncm	crn	CG14641	CG16941	Bx42	SRm160	CG13472	CG9667	Cpsf160	CG12343	CG6621	Prp31	CG1109	Fip1	l(1)10Bb	thoc7	CG7903	Smu1	CG6745+CG6765	beag	Rsf1	Rm62	Upf1	RpS3	Srp54	snRNP-U1-70K	qkr58E-2	qkr58E-3
RpS3	hyd	CG7686	Ranbp9	sqh	mahj	Rm62
Rm62	CG13472	CG4619	CG4806	CG5645	Upf1	Srp54	qkr58E-3
mub	Dp1	Upf1
Rbp1
U2af50	CG2807	SRPK	CG14786	CG16941	CG3605	U2af38	SF1	CG13472	U2A	CG9143	CG17454	CG13298	Spx	CG9346	CG8611	CG8939	CG2931	CG3335	Upf1	Srp54	qkr58E-2	qkr58E-3
CG6227	CG3605	CG2807	Bacc
Srp54	CG2807	CG2025	l(3)72Ab	Pnn	CR44357+CG1677	CG7414	CG11266+milt	abs	Bin1	CG16941	Pitslre	CG16903	pea	CG13298	CG2063	Cbp80	Upf1	qkr58E-2	qkr58E-3
Upf1	nocte	Upf2	ref(2)P	Upf3	CG33111+eIF4G2	qkr58E-2
qkr54B	bsf	qkr58E-2	qkr58E-3
CG6841	Prp8	l(3)72Ab	CG4849	Pebp1	CG14434	CG10333	holn1	trsn	sip1	CG12320	CG6674	CG5804	CG11455+CG3436	CG1965
msi	ps	didum	jar	fliI	CG33232	sqh	Spn	Arpc2	Arpc1	qkr58E-3
snRNP70K	cpb	kst	Arp2	Arp3	Gel	Arpc5	CG2199	Myo61F	Actn+usp	Arpc4	cher	CLIP-190	Arpc3A	coro	pav	tmod	tum	CG3548	SmG	Cortactin	Ote	D1	CG6509	snf
ps	CG6701	CG15784	mod	CG11107	CG10077	CG4612	Rab2	l(3)72Ab	me31B	Atx2	CG9775	CG3251	Arf79F	CaBP1	tyf	Map205	Nab2	Hop	nito	Gale	Dp1	Mtpalpha	CG17838	Upf1
Fmr1	CG6701	ref(2)P	CG10077	CG33111+eIF4G2	CG7518	Atx2	CG15784	Cen	mod	me31B	Ns1	tyf	CG4169	CG3251	Nop56	CG7878	hyd	Rs1	Dp1	alt	nop5	Arf79F	CG4612	CG16940	stc	cathD	snama	SF1	mei-218+mei-217	l(1)G0020	Srp72	Top3beta	CG9911	CG17838	Upf1

## Sheet: DPiM Interactions
DPiM Cluster	RBP	Interacting Proteins
16	mub	dup	woc	ana2	Ubqn	CG10158	RluA-2	CG1962	geminin	row	CG9754	CG4877	nxf2	CG17494	cmet	tlk	hpo
511	RnpS1	hkl
191	RpS3	alphaTub84B	h-cup
62	Upf1	BicD	CG14786	CG13126	bsf	CG8021	btz
145	Srp54	CG11107	CG31550	larp
86	Smn	Nmdmc	CG2263	CG6984	CG5706
30	snRNP70K	DebB	Ssb-c31a	snRNP-U1-C	ApepP	CG3107	U2A	CG7971	CG6218	CG6066
52	qkr54B	qkr58E-3	nito	CG6701	CG4612	CG9775	CG17838	CG7903
52	Syp	qkr54B	qkr58E-3	nito	CG6701	CG4612	CG9775	CG7903
467	Cbp20	Cbp80
482	msi	ps
482	ps	msi
Red indicates that one of the RBPs binds the transcripts for the same gene as the protein interaction partner
