# Supplementary material for: Extensive cross-regulation of post-transcriptional regulatory networks in Drosophila
Source: Genome Res. 2015 Nov;25(11):1692–702. doi: 10.1101/gr.182675.114 (PMC4617965; doi:10.1101/gr.182675.114)
Supplement: Supplemental Material [file supp_gr.182675.114_SuppTable_12_-_hnRNP_characteristics.xlsx]

## Sheet: Sheet1
RBP	Percent Unique Binding Partners	3' UTR Extension Overlap P-value	# 3' UTR Extension Genes Bound	UCG Overlap P-Value	# UCGs Bound
msi	19.4111	7.13906e-19	93	6.16491e-14	72
mub	8.54167	0.000131426	60	1.60464e-06	57
ps	16.4028	4.00596e-05	91	0.0264526	63
Syp	7.79392	0.86211	52	1	0
elav	26.1653	5.84864e-16	125	2.04589e-06	82
Upf1	4.45748	1	16	1	16
qkr54B	7.87589	4.2154e-17	109	0.000261447	62
qkr58E-1	6.82274	5.27496e-22	132	1.54133e-10	90
tra2	1.39581	0.999948	19	0.997453	19
Srp54	5.83726	0.686538	63	6.89015e-06	84
SC35	2.67528	0.991656	29	0.908267	28
SF2	1.35034	1	19	0.990127	30
Rbp1	1.73285	0.995003	38	0.345206	47
B52	2.28822	0.999995	48	0.586671	65
Fmr1	1.72911	1	4	1	4
Cbp20	16.6362	1	1	1	0
CG6227	0.865801	0.0912489	24	2.46128e-05	32
Rm62	0.227618	1	22	0.669027	40
snRNPU1	1.01833	0.999981	5	0.998374	6
U2af50	3.97135	0.99995	35	0.448595	50
