# Supplementary material for: Extensive cross-regulation of post-transcriptional regulatory networks in Drosophila
Source: Genome Res. 2015 Nov;25(11):1692–702. doi: 10.1101/gr.182675.114 (PMC4617965; doi:10.1101/gr.182675.114)
Supplement: Supplemental Material [file supp_gr.182675.114_SuppTable_13_-_Processed_Introns_Data.xlsx]

## Sheet: Supplementary Table 11 - Proces
RBP	Gene	Region	IDR	nlpadj1	nlpadj2	FC1	FC2	expr1	expr1empty	expr1samp	expr2	expr2empty	expr2samp	globalIDR
B52	14-3-3epsilon	chr3R_14068632_14073154_+	0.188677	2.31439	1.08741	2.00382	1.7327	57.6113	53.9977	108.202	56.6353	53.9977	93.562	0.0817035
B52	14-3-3zeta	chr2R_5988683_5990626_+	0.480973	0.39033	0.133576	1.741	1.57758	14.9684	14.2638	24.8332	14.813	14.2638	22.5023	0.185781
B52	14-3-3zeta	chr2R_5990647_5991619_+	0.224594	1.4842	0.717871	3.70427	3.12413	5.36923	4.5491	16.8511	5.19329	4.5491	14.212	0.100828
B52	14-3-3zeta	chr2R_5992573_5993206_+	0.142116	1.34004	1.05682	9.30901	9.32315	1.18439	0.762186	7.0952	1.18511	0.762186	7.10598	0.0598775
B52	14-3-3zeta	chr2R_5993331_5993445_+	0.185984	2.34444	5.31168	16.2115	33.6748	0.991689	0.492374	7.9821	1.56492	0.492374	16.5806	0.0805235
B52	14-3-3zeta	chr2R_5993610_5993793_+	0.15313	3.02482	1.43915	29.8015	18.3672	1.12974	0.386884	11.5297	0.834823	0.386884	7.10598	0.0649783
B52	14-3-3zeta	chr2R_5993958_5994138_+	0.47115	0.736904	1.79146	8.67119	17.3687	0.618357	0.409125	3.5476	0.855582	0.409125	7.10598	0.183666
B52	14-3-3zeta	chr2R_5994303_5994971_+	0.516461	3.59904	0.959397	12.1849	6.10169	3.04947	1.74689	21.2856	2.34103	1.74689	10.659	0.192506
B52	4EHP:Syx1A	chr3R_19927769_19929100_-	0.0998381	1.88832	1.88631	1.79555	1.83083	162.804	154.605	277.6	163.168	154.605	283.055	0.041614
B52	4EHP	chr3R_19934081_19934191_-	0.242534	0.100909	0.0901121	19.4178	25.9297	0.101756	0.0456746	0.8869	0.121585	0.0456746	1.18433	0.111879
B52	5PtaseI	chr3R_20868404_20868947_-	0.531308	0.364897	0.850882	3.04116	4.46714	3.31317	2.91632	8.869	3.59041	2.91632	13.0276	0.195099
B52	ABCB7	chr3L_1620555_1620816_+	0.0782022	2.42078	2.55996	27.0205	32.073	0.807855	0.295409	7.9821	0.907357	0.295409	9.47463	0.032826
B52	ACC	chr2R_3871569_3872385_-	0.398877	0.09537	0.181561	2.89707	3.86863	1.37942	1.22455	3.5476	1.45873	1.22455	4.73732	0.168544
B52	ACC	chr2R_3873284_3874453_-	0.835174	2.04518	0.398698	4.44412	2.81107	4.6624	3.79178	16.8511	4.24959	3.79178	10.659	0.254701
B52	AGO1	chr2R_9839194_9840553_-	0.135997	1.33377	1.2376	1.61109	1.62408	116.877	112.302	180.928	116.974	112.302	182.387	0.0570922
B52	AGO1	chr2R_9843186_9844677_-	0.247357	0.157766	0.119207	2.14831	2.29502	4.4444	4.12835	8.869	4.48477	4.12835	9.47463	0.116723
B52	AGO2	chr3L_15547573_15549922_+	0.236088	0.448039	0.497865	3.10069	3.45045	3.91309	3.43239	10.6428	3.99312	3.43239	11.8433	0.107333
B52	AGO2	chr3L_15551218_15551349_+	0.248518	0.476759	0.592614	18.4273	24.6071	0.312143	0.144389	2.6607	0.371629	0.144389	3.55299	0.118051
B52	AGO2	chr3L_15552104_15552199_+	0.250222	0.215835	0.189986	Inf	Inf	0.0591267	0	0.8869	0.0789553	0	1.18433	0.122257
B52	AIF	chr2L_2152466_2152662_+	0.343319	1.33537	0.509112	35.7488	23.8687	0.329128	0.099237	3.5476	0.250532	0.099237	2.36866	0.155938
B52	ALiX	chr3R_23524453_23524807_-	0.202518	0.756537	0.911257	34.6403	46.2572	0.249069	0.0768094	2.6607	0.308555	0.0768094	3.55299	0.088942
B52	ALiX	chr3R_23525276_23525489_-	0.0970883	2.02453	1.78599	15.8793	16.4924	1.0013	0.502673	7.9821	1.02185	0.502673	8.2903	0.0407794
B52	AMPdeam	chrX_13734045_13739384_-	0.199907	0.658494	0.555183	4.44025	4.61169	2.20997	1.79767	7.9821	2.23051	1.79767	8.2903	0.0876875
B52	AP-1gamma	chrX_9004021_9004650_+	0.0869714	4.29054	2.24382	4.46333	3.60092	11.7402	9.53799	42.5712	11.1918	9.53799	34.3455	0.0364412
B52	AP-1gamma	chrX_9006801_9007675_+	0.788589	0.437965	1.50048	10.3526	23.0407	0.417254	0.257008	2.6607	0.634651	0.257008	5.92165	0.244694
B52	AP-1sigma	chr3R_19784521_19784753_+	0.500597	0.215835	0.075984	5.67335	5.05064	0.615097	0.468982	2.6607	0.595627	0.468982	2.36866	0.18933
B52	AP-2alpha	chr2L_412886_413395_-	0.237009	0.0669137	0.0778163	1.45563	1.72782	5.65016	5.48359	7.9821	5.74966	5.48359	9.47463	0.107963
B52	AP-2alpha	chr2L_413655_414442_-	0.809472	1.54012	0.310284	3.21747	2.24164	7.27722	6.33998	20.3987	6.86477	6.33998	14.212	0.248941
B52	APC7	chrX_6492638_6492707_+	0.245847	0.0953842	0.0901121	16.0629	21.4497	0.11066	0.0552143	0.8869	0.130489	0.0552143	1.18433	0.114703
B52	ATPCL	chr2R_11883871_11884399_-	0.0392502	6.48341	3.88782	20.3627	15.538	2.09534	0.91466	18.6249	1.80115	0.91466	14.212	0.0166594
B52	ATPCL	chr2R_11885758_11887309_-	1	0.16944	0.00057374	1.77705	1.582	6.29928	5.98903	10.6428	6.22141	5.98903	9.47463	0.375164
B52	ATPCL	chr2R_11887793_11888685_-	0.243224	1.50581	3.00175	4.26581	6.40843	6.0762	4.98982	21.2856	6.78896	4.98982	31.9769	0.112365
B52	Aac11	chr2L_17477227_17477398_-	0.50674	0.331619	0.725023	30.0678	60.2269	0.173314	0.0589934	1.7738	0.291926	0.0589934	3.55299	0.190906
B52	Aats-ala	chr2L_8381589_8381679_-	0.195008	0.694528	0.596646	7.49731	8.00927	0.847681	0.591479	4.4345	0.867868	0.591479	4.73732	0.0850565
B52	Aats-asp	chr2R_8767957_8768274_+	0.0910288	3.25294	1.94213	7.06985	5.74656	4.05287	2.88531	20.3987	3.79833	2.88531	16.5806	0.0380306
B52	Aats-asp	chr2R_8768376_8768454_+	0.352483	0.48187	0.865921	Inf	Inf	0.118253	0	1.7738	0.236866	0	3.55299	0.15821
B52	Aats-glupro	chr3R_19783786_19783964_-	0.279671	0.0301294	0.0570678	3.50036	4.67424	0.591218	0.506748	1.7738	0.630875	0.506748	2.36866	0.137599
B52	Aats-his	chrX_18410328_18411500_+	0.217319	0.510418	0.470242	1.95511	2.02124	14.958	14.0626	27.4939	15.02	14.0626	28.4239	0.096651
B52	Aats-lys	chrX_9502326_9502454_-	0.269794	0.279236	0.332104	38.8356	51.8594	0.160883	0.0456746	1.7738	0.20054	0.0456746	2.36866	0.133433
B52	Aats-thr	chr2L_12104057_12104282_+	0.785961	0.925197	0.189986	4.9629	3.31362	2.25919	1.78706	8.869	2.0627	1.78706	5.92165	0.243952
B52	Abl	chr3L_16618375_16619372_-	0.275784	2.13849	0.848309	3.43852	2.72098	8.09628	6.96414	23.9463	7.76315	6.96414	18.9493	0.13596
B52	Abl	chr3L_16619717_16619842_-	0.248177	0.0939234	0.0901121	10.3858	13.8687	0.138829	0.0853955	0.8869	0.158658	0.0853955	1.18433	0.117694
B52	Abl	chr3L_16620293_16620601_-	0.0520939	4.19472	2.95461	6.2168	5.53444	6.922	5.13582	31.9284	6.68836	5.13582	28.4239	0.0218751
B52	Ac3	chr2L_21634610_21634725_+	0.79538	0.131378	0.421371	3.00074	5.00882	1.33993	1.18224	3.5476	1.4982	1.18224	5.92165	0.245747
B52	Ac3	chr2L_21640006_21640727_+	0.972506	0.0482253	0.299551	1.77905	2.63963	4.71976	4.48673	7.9821	4.97717	4.48673	11.8433	0.304535
B52	Ac76E	chr3L_19968576_19968698_+	0.804695	0.0184017	0.0901121	2.14697	5.73395	0.444681	0.413094	0.8869	0.543465	0.413094	2.36866	0.24796
B52	Acn	chr2L_19047048_19047151_+	0.194263	0.813437	0.58078	Inf	Inf	0.17738	0	2.6607	0.157911	0	2.36866	0.0845251
B52	Acsl	chr2R_4553376_4553675_+	0.280637	0.183019	0.189986	1.34231	1.44553	41.9	40.9652	54.9878	42.1819	40.9652	59.2165	0.137901
B52	Acsl	chr2R_4554300_4558227_+	0.991961	0.0815243	0.530563	1.44073	1.92389	21.5451	20.9301	30.1546	22.2193	20.9301	40.2672	0.325644
B52	Acsl	chr2R_4558326_4559560_+	0.682159	0.245506	0.675475	1.96885	2.62912	9.11167	8.55886	16.8511	9.48842	8.55886	22.5023	0.222643
B52	Acsl	chr2R_4559912_4562151_+	0.36386	0.365512	0.628344	2.13698	2.56827	8.92965	8.30049	17.738	9.16832	8.30049	21.3179	0.161142
B52	Act42A	chr2R_1902928_1903081_-	0.238335	0.083072	0.0887001	11.5468	15.4191	0.130815	0.0768094	0.8869	0.150644	0.0768094	1.18433	0.108839
B52	Act5C	chrX_5795047_5796014_+	0.22425	0.565436	0.648782	1.51301	1.61633	39.405	38.1019	57.6485	39.6674	38.1019	61.5851	0.100616
B52	Act5C	chrX_5796130_5796722_+	0.778615	0.188642	0.0326765	1.38258	1.30775	31.5764	30.7911	42.5712	31.4228	30.7911	40.2672	0.242303
B52	Actn	chrX_1920943_1921216_-	0.25625	0.0904357	0.0901121	19.4178	25.9297	0.101756	0.0456746	0.8869	0.121585	0.0456746	1.18433	0.126737
B52	Actn	chrX_1922061_1922697_-	0.999997	4.84439	0.189986	18.5562	3.81217	1.34857	0.621341	11.5297	0.737829	0.621341	2.36866	0.369842
B52	Actn	chrX_1922784_1923807_-	0.0558244	4.81412	2.9105	20.2309	15.4375	2.1009	0.920614	18.6249	1.8067	0.920614	14.212	0.0232211
B52	Actn	chrX_1923960_1924247_-	0.440446	0.543688	0.189986	Inf	Inf	0.118253	0	1.7738	0.0789553	0	1.18433	0.177614
B52	Actn	chrX_1929445_1930439_-	0.266842	0.21522	0.199272	10.2413	13.6758	0.279908	0.173201	1.7738	0.319565	0.173201	2.36866	0.132159
B52	AdSS	chr3R_16651716_16651785_-	0.999972	0.441207	0.0142643	7.86524	4.20117	0.821856	0.56381	4.4345	0.684133	0.56381	2.36866	0.364259
B52	AdSS	chr3R_16652066_16652816_-	0.144634	1.61329	1.05904	5.97146	5.31602	3.55947	2.67342	15.9642	3.44265	2.67342	14.212	0.0608567
B52	AdSS	chr3R_16653935_16655997_-	0.870268	1.06392	0.189986	1.95027	1.52327	25.6291	24.1022	47.0057	24.943	24.1022	36.7142	0.263869
B52	Ada2b	chr3R_4063975_4064452_-	0.0917699	2.09026	1.97742	8.58057	9.37484	1.71157	1.13698	9.7559	1.77177	1.13698	10.659	0.0382868
B52	Adam	chr2R_5856741_5856965_+	0.00372647	24.5012	14.1816	22.9766	15.5025	9.03959	3.66702	84.2555	7.21241	3.66702	56.8478	0.0015908
B52	Adam	chr2R_5857058_5857245_+	0.0478652	4.15266	3.17249	16.8033	14.4764	3.36006	1.63622	27.4939	3.10624	1.63622	23.6866	0.0201429
B52	Adar	chrX_1669772_1672402_+	0.996088	0.0216098	0.218222	1.28211	1.64359	17.619	17.2938	22.1725	18.0358	17.2938	28.4239	0.333073
B52	AdenoK	chr3L_13013927_13014173_-	0.314111	0.397615	0.189986	Inf	Inf	0.118253	0	1.7738	0.0789553	0	1.18433	0.148308
B52	AdenoK	chr3L_13014786_13015537_-	1	1.04733	0.0214995	6.88269	2.75726	1.79396	1.2886	8.869	1.43955	1.2886	3.55299	0.374796
B52	AdipoR	chr3R_18371996_18372433_-	0.102028	1.86742	2.05079	11.7555	14.128	1.29542	0.754455	8.869	1.41476	0.754455	10.659	0.0425844
B52	AdipoR	chr3R_18372921_18373105_-	1	0.0114652	1.41153	5.59602	44.8361	0.207049	0.158488	0.8869	0.621654	0.158488	7.10598	0.382083
B52	Aef1	chr3L_21427148_21428124_+	1	0.708531	0.0124903	3.25238	1.9001	5.01824	4.36308	14.1904	4.6249	4.36308	8.2903	0.375124
B52	Afti	chr3R_10149010_10150281_-	0.906727	0.107989	0.437281	3.8324	7.67644	0.55024	0.462843	1.7738	0.668853	0.462843	3.55299	0.27467
B52	Ahcy13	chrX_15344891_15345427_+	0.330145	0.310361	0.477719	4.85533	6.48361	1.14807	0.913326	4.4345	1.24721	0.913326	5.92165	0.152761
B52	Akap200	chr2L_8420065_8426772_+	0.205807	0.867396	1.16705	1.49995	1.58338	154.581	149.595	224.386	155.413	149.595	236.866	0.0906647
B52	Akap200	chr2L_8429463_8430280_+	0.407651	0.882173	1.99035	6.01486	10.3269	1.37724	1.03216	6.2083	1.67395	1.03216	10.659	0.170575
B52	Akt1	chr3R_11925383_11926481_+	0.0868775	2.18434	2.26482	3.40924	3.7938	7.2463	6.2435	21.2856	7.40637	6.2435	23.6866	0.0363908
B52	Alas	chr2R_19853651_19853794_+	0.999355	0.015529	0.252171	6.30753	16.8456	0.190362	0.14061	0.8869	0.289146	0.14061	2.36866	0.349176
B52	Ald	chr3R_22081154_22081687_-	0.873039	0.287676	0.0470307	2.72705	2.18495	3.62669	3.25224	8.869	3.50915	3.25224	7.10598	0.264388
B52	Ald	chr3R_22082346_22082654_-	0.725753	0.165807	0.459147	2.10408	3.21109	3.16778	2.9506	6.2083	3.38553	2.9506	9.47463	0.231352
B52	Ald	chr3R_22085558_22086623_-	0.0759074	2.48703	2.75596	2.60472	2.85712	21.1078	19.0679	49.6664	21.4286	19.0679	54.4791	0.031836
B52	Aldh-III	chr2R_3355332_3355926_-	0.236742	5.67851	1.86419	9.39201	5.62214	4.27061	2.73851	25.7201	3.58236	2.73851	15.3963	0.107696
B52	Aldh-III	chr2R_3356043_3356614_-	0.0332901	10.3741	5.09818	10.622	7.21648	7.81225	4.75932	50.5533	6.73174	4.75932	34.3455	0.0141469
B52	Aldh-III	chr2R_3356731_3356864_-	0.140056	1.47852	1.93676	7.38107	9.85637	1.3702	0.96127	7.0952	1.52883	0.96127	9.47463	0.0588632
B52	Aldh-III	chr2R_3357578_3357898_-	0.998988	0.565557	0.0370773	7.21465	3.85365	0.869309	0.614652	4.4345	0.731586	0.614652	2.36866	0.345296
B52	Aldh-III	chr2R_3358388_3360792_-	0.238725	0.0959162	0.0638107	2.67381	2.8564	1.84356	1.65849	4.4345	1.86375	1.65849	4.73732	0.109066
B52	Aldh-III	chr2R_3360852_3361226_-	0.567679	0.940192	0.260723	17.7733	11.8668	0.422803	0.199603	3.5476	0.344207	0.199603	2.36866	0.201876
B52	Aldh	chr2L_9387891_9389828_+	0.605367	0.275887	0.707722	2.04441	2.73002	7.88839	7.3749	15.0773	8.22548	7.3749	20.1336	0.209274
B52	Alh	chr3R_2927820_2932799_-	0.708027	0.0234494	0.0907239	2.01989	2.69727	2.34469	2.19542	4.4345	2.44384	2.19542	5.92165	0.227482
B52	Alh	chr3R_2947476_2949361_-	0.291121	0.380856	0.199379	3.21553	3.06706	2.2159	1.93073	6.2083	2.19679	1.93073	5.92165	0.141222
B52	Amph	chr2R_8481574_8482000_+	0.255283	0.0908404	0.0901121	10.3858	13.8687	0.138829	0.0853955	0.8869	0.158658	0.0853955	1.18433	0.126089
B52	Amun	chrX_11606400_11606801_-	0.558288	0.260494	0.625845	6.09378	10.8498	0.584897	0.436626	2.6607	0.723339	0.436626	4.73732	0.200276
B52	Amun	chrX_11607881_11608054_-	0.999993	1.83175	0.0780432	20.0289	5.34915	1.00456	0.44281	8.869	0.5712	0.44281	2.36866	0.36834
B52	Amun	chrX_11609064_11609304_-	0.131767	0.0136089	0.0157171	6.60808	8.82416	0.184393	0.134214	0.8869	0.204222	0.134214	1.18433	0.055353
B52	Ant2	chrX_10673729_10674025_-	0.230029	0.590742	0.388741	46.3496	41.2622	0.230958	0.057405	2.6607	0.211489	0.057405	2.36866	0.103725
B52	Ant2	chrX_10674695_10674925_-	0.843622	0.0851378	0.276817	2.35754	3.77779	2.05122	1.88099	4.4345	2.22932	1.88099	7.10598	0.256358
B52	AnxB10	chrX_20065682_20065961_-	0.143426	1.33579	1.03915	46.1871	46.2572	0.308195	0.0768094	3.5476	0.308555	0.0768094	3.55299	0.0603565
B52	AnxB10	chrX_20067050_20067401_-	0.350425	0.155775	0.20688	2.03508	2.37787	7.45405	6.97289	14.1904	7.6134	6.97289	16.5806	0.157625
B52	AnxB11	chrX_16314426_16315813_-	0.332152	0.775418	1.49968	1.60788	1.85001	91.2581	87.7039	141.017	92.6738	87.7039	162.253	0.153219
B52	AnxB9	chr3R_16891674_16893167_+	1	0.65404	0.00858481	2.33525	1.51922	16.1302	14.8117	34.5891	15.3244	14.8117	22.5023	0.377
B52	AnxB9	chr3R_16893222_16893790_+	0.25959	3.2646	1.20239	5.50317	3.77933	7.33405	5.64066	31.0415	6.68581	5.64066	21.3179	0.128833
B52	AnxB9	chr3R_16894742_16895034_+	0.0260504	5.70552	5.39794	9.20554	9.92872	3.87524	2.50495	23.0594	3.99601	2.50495	24.8709	0.0110456
B52	AnxB9	chr3R_16895477_16895999_+	0.100959	2.99169	1.78164	8.42345	7.0302	2.51835	1.68463	14.1904	2.36188	1.68463	11.8433	0.0420724
B52	Apoltp	chr2L_9634329_9641680_+	0.721389	1.83072	0.419613	2.34807	1.74865	21.4063	19.6411	46.1188	20.6214	19.6411	34.3455	0.230458
B52	Aps	chr3L_10889978_10890997_-	0.24954	0.21522	0.167501	2.06152	2.16297	6.44927	6.02303	12.4166	6.49001	6.02303	13.0276	0.1191
B52	Arf102F	chr4_1145325_1145393_+	0.357705	0.216023	0.0901121	30.0678	20.0756	0.173314	0.0589934	1.7738	0.134016	0.0589934	1.18433	0.159738
B52	Arf51F	chr2R_11210647_11210953_+	0.302321	0.29966	0.415101	2.69932	3.2441	3.65787	3.28564	8.869	3.7772	3.28564	10.659	0.144877
B52	Arf79F	chr3L_22862347_22862445_-	0.937723	1.84305	0.281375	69.8911	20.7399	0.638734	0.114208	7.9821	0.264504	0.114208	2.36866	0.285855
B52	Arf79F	chr3L_22863251_22863314_-	0.266594	0.206318	0.189986	9.65098	12.8875	0.289795	0.183795	1.7738	0.329452	0.183795	2.36866	0.132093
B52	Arf79F	chr3L_22863395_22863946_-	0.0493582	7.65941	3.73681	5.15751	3.9355	12.299	9.62992	49.6664	11.5145	9.62992	37.8985	0.0207117
B52	Arf79F	chr3L_22864188_22864419_-	0.174336	1.97123	1.02519	4.16375	3.51164	4.9007	4.0471	16.8511	4.72476	4.0471	14.212	0.0748297
B52	ArfGAP1	chr3L_12409105_12409374_-	1	0.0115895	0.573362	6.12028	24.5183	0.194378	0.144912	0.8869	0.372117	0.144912	3.55299	0.374591
B52	ArfGAP3	chr3L_22709515_22709668_-	0.999999	0.66605	0.0146279	21.5187	7.1838	0.390377	0.164861	3.5476	0.232826	0.164861	1.18433	0.371626
B52	Arfip	chr3R_7059293_7059643_-	0.878705	0.0673995	0.252363	3.02369	5.38361	0.998669	0.879952	2.6607	1.13711	0.879952	4.73732	0.266045
B52	Arp2	chrX_16444499_16445507_-	0.0559519	4.86283	2.92227	5.86393	4.98301	6.60958	4.99114	29.2677	6.31646	4.99114	24.8709	0.0232811
B52	Arp2	chrX_16445523_16446372_-	0.45981	0.496714	1.10819	2.07077	2.94957	6.88302	6.42441	13.3035	7.2594	6.42441	18.9493	0.1816
B52	Arp3	chr3L_8107152_8107212_-	0.999163	0.0301294	0.398698	4.84218	19.3981	0.230077	0.183161	0.8869	0.407817	0.183161	3.55299	0.346728
B52	Arp3	chr3L_8107894_8108129_-	0.534634	1.27051	0.369542	8.75846	5.31622	1.69002	1.11388	9.7559	1.4344	1.11388	5.92165	0.195949
B52	Arpc2	chr2L_20420066_20420318_+	0.283032	0.229159	0.133314	8.28987	7.37996	0.476941	0.320958	2.6607	0.457471	0.320958	2.36866	0.138559
B52	Ars2	chr2R_1968921_1969240_-	0.370428	1.01754	0.387593	13.0123	8.68807	0.981929	0.545267	7.0952	0.824737	0.545267	4.73732	0.162736
B52	Ars2	chr2R_1971513_1971673_-	0.12103	2.57061	1.49429	47.4677	35.2146	0.689088	0.168159	7.9821	0.551725	0.168159	5.92165	0.0505263
B52	Ars2	chr2R_1971896_1972012_-	0.999999	2.4912	0.0871075	71.4975	11.9344	0.565635	0.099237	7.0952	0.171576	0.099237	1.18433	0.372494
B52	Ars2	chr2R_1972942_1973054_-	0.734205	0.350156	0.089166	6.01439	4.01568	0.787035	0.589852	3.5476	0.708439	0.589852	2.36866	0.233439
B52	Art2	chr2L_4279350_4281199_-	0.999942	0.0103054	0.278071	6.85627	18.3112	0.179859	0.129356	0.8869	0.278643	0.129356	2.36866	0.361494
B52	Asap	chr2R_4007126_4009761_-	0.801698	1.21303	0.238753	4.89426	3.01642	2.96736	2.35576	11.5297	2.67244	2.35576	7.10598	0.24725
B52	Asator	chr4_502331_502436_-	0.237957	0.0854369	0.0892689	15.0339	20.0756	0.114187	0.0589934	0.8869	0.134016	0.0589934	1.18433	0.108515
B52	Ate1	chr2R_16143741_16143940_-	0.721777	1.45643	0.331495	10.2382	5.25835	1.81971	1.12614	11.5297	1.44584	1.12614	5.92165	0.230539
B52	Atet	chr2L_4334440_4336449_+	0.523513	0.426346	0.998636	3.24545	4.76722	3.14183	2.73275	8.869	3.41907	2.73275	13.0276	0.193838
B52	Atet	chr2L_4339118_4341500_+	0.336406	0.0963486	0.150421	2.30123	3.07296	1.25651	1.15621	2.6607	1.316	1.15621	3.55299	0.154335
B52	Atf6	chr2R_1036662_1040293_+	0.0398178	4.30835	3.91527	1.8478	1.84529	235.296	222.709	411.522	235.259	222.709	410.962	0.0168982
B52	Atg10	chr2R_3721347_3721438_+	0.111428	1.77709	1.49105	18.4312	18.4592	0.832305	0.384955	7.0952	0.833023	0.384955	7.10598	0.0465101
B52	Atg16	chr3R_25654249_25657411_-	0.0796037	2.68933	2.06171	5.51003	5.09391	8.16492	6.27748	34.5891	7.99077	6.27748	31.9769	0.0334608
B52	Atg16	chr3R_25658095_25658914_-	0.077904	2.69878	3.78962	6.73715	8.99651	4.00386	2.89615	19.5118	4.44009	2.89615	26.0552	0.0326635
B52	Atg18a	chr3L_8181681_8182386_+	0.221484	0.653092	0.826108	2.99037	3.46079	5.03909	4.44878	13.3035	5.17861	4.44878	15.3963	0.0989294
B52	Atg18b	chr2L_21218545_21220259_-	0.0687666	3.72896	2.39311	4.31867	3.80096	11.0352	9.03602	39.0236	10.7233	9.03602	34.3455	0.0290997
B52	Atg3	chr3L_18741990_18742443_+	0.403038	0.0419159	0.0901121	2.46295	3.28892	1.58087	1.44039	3.5476	1.66018	1.44039	4.73732	0.16944
B52	Atg5	chrX_7209284_7216399_-	0.19759	0.7044	0.559714	2.1053	2.10849	14.474	13.4807	28.3808	14.4769	13.4807	28.4239	0.0863534
B52	Atg8a	chrX_10660690_10661185_-	0.175445	0.951245	0.730222	6.2615	6.08098	2.1046	1.55808	9.7559	2.08585	1.55808	9.47463	0.0755934
B52	Atg8a	chrX_10661340_10662013_-	0.202899	1.10169	0.639149	3.79527	3.3787	4.1585	3.50528	13.3035	4.06115	3.50528	11.8433	0.089099
B52	Atox1	chr3L_21634463_21635073_+	0.332947	0.0877472	0.115266	3.53929	4.72622	0.879023	0.751761	2.6607	0.938509	0.751761	3.55299	0.153392
B52	Atpalpha	chr3R_16792622_16792829_+	0.382935	0.384664	0.698257	3.99711	5.33757	2.39598	1.99697	7.9821	2.57444	1.99697	10.659	0.165256
B52	Atx2	chr3R_11234912_11235172_+	0.264722	1.66485	0.71145	7.65502	5.679	1.50535	1.04273	7.9821	1.36799	1.04273	5.92165	0.131284
B52	Atx2	chr3R_11236634_11237842_+	0.846379	0.519477	0.0945331	2.67777	2.01138	5.89208	5.29934	14.1904	5.65665	5.29934	10.659	0.257375
B52	Axn	chr3R_25851262_25853082_+	0.321707	0.215835	0.307812	3.56754	4.76395	1.74693	1.49162	5.3214	1.86591	1.49162	7.10598	0.150643
B52	Axn	chr3R_25853299_25856485_+	0.48437	0.58547	0.189986	5.14326	3.74623	2.42077	1.89683	9.7559	2.24411	1.89683	7.10598	0.186468
B52	Axs	chrX_16577167_16577241_-	0.247167	0.0946823	0.0901121	11.5468	15.4191	0.130815	0.0768094	0.8869	0.150644	0.0768094	1.18433	0.116597
B52	Axud1	chr2L_2365902_2366274_+	0.197279	1.20964	0.692818	28.7113	23.0039	0.439788	0.154451	4.4345	0.38102	0.154451	3.55299	0.0861961
B52	B-H2	chrX_17209945_17214767_+	0.241872	0.103636	0.0901121	8.93719	11.9344	0.151748	0.099237	0.8869	0.171576	0.099237	1.18433	0.111354
B52	B4	chr2L_13509793_13512959_-	0.194231	0.712836	0.588977	1.59275	1.58584	65.9877	63.4792	101.107	65.9584	63.4792	100.668	0.0844857
B52	B4	chr2L_13547772_13549131_-	0.112402	6.77818	2.61131	2.84533	2.16324	47.9568	42.7034	121.505	46.015	42.7034	92.3777	0.0467461
B52	B52	chr3R_9487582_9487882_+	0.219953	0.700052	0.905578	11.3422	15.1459	0.528434	0.312779	3.5476	0.607748	0.312779	4.73732	0.0981706
B52	B52	chr3R_9488127_9488676_+	0.0777714	2.55807	3.2828	7.16302	9.06176	3.31909	2.35252	16.8511	3.61688	2.35252	21.3179	0.0325985
B52	BEAF-32	chr2R_10659148_10659304_+	0.149467	0.02208	0.0193476	6.14244	8.20235	0.19389	0.144389	0.8869	0.213718	0.144389	1.18433	0.0633397
B52	BM-40-SPARC	chr3R_22695853_22695914_-	0.23837	0.455672	0.518691	Inf	Inf	0.118253	0	1.7738	0.157911	0	2.36866	0.108877
B52	BM-40-SPARC	chr3R_22696290_22697647_-	0.0969754	2.08776	2.55996	2.33147	2.63025	24.0218	22.0634	51.4402	24.4613	22.0634	58.0321	0.0407276
B52	BRWD3	chr3R_20145190_20145313_+	0.283944	1.32583	0.565468	25.2466	16.8566	0.551485	0.210777	5.3214	0.433591	0.210777	3.55299	0.138914
B52	BRWD3	chr3R_20145799_20146389_+	0.236047	0.366969	0.297637	4.08796	4.36711	1.30809	1.08477	4.4345	1.32827	1.08477	4.73732	0.107294
B52	Bacc	chr2L_2753661_2756007_+	0.0548676	4.23707	2.8532	2.53377	2.32256	45.5272	41.3038	104.654	44.9456	41.3038	95.9307	0.0229369
B52	Bap55	chr2R_13318068_13318146_-	0.367567	0.222546	0.0901121	30.8997	20.6311	0.171831	0.057405	1.7738	0.132533	0.057405	1.18433	0.162041
B52	Best1	chr3R_5988033_5988754_-	0.495725	0.229011	0.487043	2.51809	3.36256	3.49071	3.1699	7.9821	3.66917	3.1699	10.659	0.18845
B52	Best1	chr3R_5989579_5990296_-	0.464061	0.21395	0.37019	1.8419	2.29562	7.62809	7.2227	13.3035	7.84656	7.2227	16.5806	0.182415
B52	Bet3	chr3L_9432661_9433155_-	0.253053	0.219139	0.179315	6.52513	6.53504	0.743944	0.543683	3.5476	0.744303	0.543683	3.55299	0.124608
B52	BicD	chr2L_17464556_17471602_-	0.919143	0.0933382	0.395139	1.84376	2.6859	5.58895	5.29131	9.7559	5.88602	5.29131	14.212	0.279127
B52	Bin1	chr3R_12012361_12012433_-	0.223751	0.568073	0.652303	Inf	Inf	0.118253	0	1.7738	0.157911	0	2.36866	0.100364
B52	Bmcp	chr3L_11714565_11715104_+	0.587233	0.029696	0.0901121	2.33672	3.12036	1.65349	1.5182	3.5476	1.7328	1.5182	4.73732	0.205514
B52	Bruce	chr3R_6155724_6156689_-	0.062617	5.69879	2.95115	12.3403	8.44034	5.17442	2.94667	36.3629	4.40829	2.94667	24.8709	0.0263889
B52	Bsg25D	chr2L_5275781_5276287_-	0.43687	0.938449	0.319957	12.843	8.57499	0.74148	0.414343	5.3214	0.623586	0.414343	3.55299	0.176513
B52	Bsg25D	chr2L_5277342_5277933_-	0.0494965	3.54758	3.92849	8.8281	10.5478	2.90496	1.9088	16.8511	3.12379	1.9088	20.1336	0.0207689
B52	Bsg	chr2L_8083637_8088303_+	0.181568	1.42547	2.30414	1.74623	2.01387	58.6476	55.8682	97.559	59.6444	55.8682	112.511	0.0783588
B52	BtbVII	chr3L_3148922_3149132_+	0.417235	0.571905	1.20787	2.52966	3.378	7.34072	6.66141	16.8511	7.71747	6.66141	22.5023	0.172324
B52	BtbVII	chr3L_3149161_3149627_+	0.0885705	2.29008	1.90581	3.60547	3.57656	10.105	8.60955	31.0415	10.0884	8.60955	30.7926	0.037064
B52	BtbVII	chr3L_3151185_3151263_+	0.957154	1.39214	0.189986	Inf	Inf	0.295633	0	4.4345	0.0789553	0	1.18433	0.295246
B52	BtbVII	chr3L_3151373_3152454_+	0.0370195	4.34203	4.57897	5.83675	6.57632	6.43032	4.86243	28.3808	6.67006	4.86243	31.9769	0.0156724
B52	BtbVII	chr3L_3155679_3155957_+	0.685763	1.61383	0.387593	6.55326	4.08378	2.78162	2.03006	13.3035	2.44741	2.03006	8.2903	0.223261
B52	Bx42	chrX_8999991_9000257_-	0.728715	0.339346	1.02109	5.00038	13.3546	0.449337	0.354733	1.7738	0.646905	0.354733	4.73732	0.232291
B52	Bzd	chrX_2501758_2502002_-	0.813156	0.466959	0.0901121	46.3496	20.6311	0.230958	0.057405	2.6607	0.132533	0.057405	1.18433	0.249523
B52	C3G	chrX_6678769_6679543_-	0.874348	0.765593	3.11801	8.01729	21.4119	0.974251	0.66374	5.3214	1.56695	0.66374	14.212	0.264766
B52	C3G	chrX_6679697_6680188_-	0.919509	0.592546	0.0901121	9.66026	5.15996	0.724076	0.459046	4.4345	0.586353	0.459046	2.36866	0.279273
B52	C3G	chrX_6680846_6681128_-	0.159143	1.14976	1.39698	38.8284	51.8498	0.402227	0.114208	4.4345	0.50137	0.114208	5.92165	0.0677462
B52	CAP	chr2R_6193476_6193649_+	0.478296	0.215835	0.444475	Inf	Inf	0.0591267	0	0.8869	0.157911	0	2.36866	0.18518
B52	CASK	chr3R_17613003_17613507_-	0.387154	0.482664	0.189986	Inf	Inf	0.118253	0	1.7738	0.0789553	0	1.18433	0.166048
B52	CASK	chr3R_17614650_17615170_-	0.154255	1.73132	1.0357	17.8931	14.3362	1.05389	0.495666	8.869	0.936353	0.495666	7.10598	0.0655193
B52	CASK	chr3R_17615483_17616430_-	0.0488914	7.39627	3.70233	25.6171	16.4198	2.286	0.865537	22.1725	1.7553	0.865537	14.212	0.020526
B52	CASK	chr3R_17616461_17617252_-	0.0826652	2.86595	2.00185	12.0089	10.6907	1.92085	1.10781	13.3035	1.82351	1.10781	11.8433	0.034611
B52	CASK	chr3R_17617869_17629050_-	0.0938165	2.09519	2.45172	3.49309	3.97857	10.0674	8.63264	30.1546	10.3468	8.63264	34.3455	0.03903
B52	CASK	chr3R_17634412_17642822_-	0.0743811	3.37853	2.21882	3.62658	3.26606	12.3573	10.5159	38.1367	12.1045	10.5159	34.3455	0.0312098
B52	CASK	chr3R_17644846_17645375_-	0.0266117	5.65894	5.30666	22.9207	24.4859	1.90483	0.773886	17.738	1.98558	0.773886	18.9493	0.0112487
B52	CCHa1-R	chr2R_13539073_13541448_-	0.344906	1.40348	0.530517	10.9404	7.30468	1.34789	0.810664	8.869	1.1514	0.810664	5.92165	0.15655
B52	CD98hc	chr3R_3800588_3800775_-	0.238273	0.34573	0.288201	5.28848	5.64961	1.07825	0.838521	4.4345	1.09844	0.838521	4.73732	0.108744
B52	CD98hc	chr3R_3802136_3802611_-	0.214538	0.532568	0.470079	7.92151	8.46244	0.818118	0.559805	4.4345	0.838306	0.559805	4.73732	0.0949684
B52	CD98hc	chr3R_3802791_3803283_-	0.102069	2.06446	2.70258	6.78511	8.58367	3.44138	2.48354	16.8511	3.73917	2.48354	21.3179	0.0426197
B52	CDase	chr3R_26286631_26288272_+	0.999997	1.04517	0.032485	3.19776	1.83007	6.67773	5.82436	18.6249	6.14666	5.82436	10.659	0.369676
B52	CG10068	chr3R_2953195_2953294_-	0.245473	0.0957789	0.0901121	8.58788	11.4679	0.155515	0.103273	0.8869	0.175344	0.103273	1.18433	0.114371
B52	CG10077	chr3L_6944546_6944903_-	0.795563	0.940192	0.189986	1.79223	1.46913	52.6205	49.9808	89.5769	51.5439	49.9808	73.4284	0.245791
B52	CG10077	chr3L_6948270_6948480_-	0.31527	2.08776	0.775774	4.16533	3.09011	6.96212	5.74896	23.9463	6.55003	5.74896	17.7649	0.148801
B52	CG10082	chr2R_17533997_17537615_+	0.909873	0.362422	0.057463	1.69956	1.41845	13.1083	12.5242	21.2856	12.8736	12.5242	17.7649	0.27554
B52	CG10082	chr2R_17540069_17541143_+	0.0995491	2.11675	1.67306	3.00084	2.95267	12.729	11.2309	33.7022	12.6929	11.2309	33.1612	0.0415613
B52	CG10082	chr2R_17541569_17542279_+	0.201685	1.10215	0.643478	4.04287	3.59912	3.95813	3.29061	13.3035	3.86079	3.29061	11.8433	0.0885497
B52	CG10097+CG10096	chr3R_8220702_8220797_-	0.250222	0.215835	0.189986	Inf	Inf	0.0591267	0	0.8869	0.0789553	0	1.18433	0.122257
B52	CG10098	chr3R_2950785_2951140_+	0.180412	0.00815779	0.0201513	2.8227	3.76932	0.704764	0.628405	1.7738	0.744422	0.628405	2.36866	0.0777894
B52	CG10103	chr3L_6747594_6747844_-	0.515753	0.457983	0.155449	4.88324	3.91252	1.1432	0.908107	4.4345	1.08443	0.908107	3.55299	0.192359
B52	CG10103	chr3L_6748037_6748172_-	0.0890289	2.14052	2.08886	4.6219	5.08273	4.04982	3.26214	15.0773	4.15004	3.26214	16.5806	0.03725
B52	CG10103	chr3L_6748224_6748519_-	0.103738	2.10543	2.86506	6.68083	8.9213	2.37938	1.72579	11.5297	2.63716	1.72579	15.3963	0.0433099
B52	CG10137	chr2L_19530306_19530913_+	0.332564	1.01304	0.413376	16.1651	10.7931	0.662005	0.329191	5.3214	0.544111	0.329191	3.55299	0.153296
B52	CG10184	chr3R_19429625_19430535_-	0.276622	0.437965	0.22764	2.01852	1.90928	11.2612	10.5451	21.2856	11.1844	10.5451	20.1336	0.136344
B52	CG10289	chr3L_6163043_6163216_-	0.527165	0.624891	0.189986	Inf	Inf	0.118253	0	1.7738	0.0789553	0	1.18433	0.194407
B52	CG10289	chr3L_6166637_6166859_-	0.26644	0.48512	0.27226	6.86907	6.11511	1.0778	0.774691	5.3214	1.03887	0.774691	4.73732	0.131994
B52	CG10306	chr2R_17572952_17573017_+	0.250927	0.092958	0.0901121	19.4178	25.9297	0.101756	0.0456746	0.8869	0.121585	0.0456746	1.18433	0.122966
B52	CG10321	chr2R_17522487_17522885_+	0.280818	0.244165	0.287278	2.88797	3.37441	2.76604	2.45681	7.0952	2.84571	2.45681	8.2903	0.137968
B52	CG10326	chr3R_12469631_12469739_+	0.978314	0.236744	1.35191	13.2162	44.1208	0.24352	0.134214	1.7738	0.520043	0.134214	5.92165	0.309731
B52	CG10337	chr2L_19546426_19546646_-	0.999911	0.258165	0.00797572	11.4845	7.66798	0.262408	0.154451	1.7738	0.22311	0.154451	1.18433	0.359695
B52	CG10353	chrX_11775936_11777133_-	0.258795	0.293152	0.189986	1.84104	1.84384	10.175	9.63475	17.738	10.1768	9.63475	17.7649	0.128306
B52	CG10375	chr3R_19593593_19593730_+	0.249459	0.0930542	0.0901121	13.5148	18.0472	0.120376	0.0656241	0.8869	0.140204	0.0656241	1.18433	0.119047
B52	CG10435	chr3R_3837440_3837852_-	0.146599	1.39826	1.82789	6.50471	8.10705	2.79576	2.04521	13.3035	3.01424	2.04521	16.5806	0.0618189
B52	CG10508	chr3L_21206592_21206861_+	0.250222	0.215835	0.189986	Inf	Inf	0.0591267	0	0.8869	0.0789553	0	1.18433	0.122257
B52	CG10527	chr2R_16959401_16960229_-	0.101626	1.86836	2.03373	3.23278	3.55511	10.7162	9.32777	30.1546	10.9167	9.32777	33.1612	0.0423728
B52	CG10555	chrX_8294037_8294149_+	0.250222	0.215835	0.189986	Inf	Inf	0.0591267	0	0.8869	0.0789553	0	1.18433	0.122257
B52	CG10565	chr3L_21128006_21128463_-	0.019667	10.5488	6.39371	25.4307	17.3125	4.67552	1.77864	45.2319	3.7129	1.77864	30.7926	0.00825134
B52	CG10565	chr3L_21128610_21128717_-	0.470076	0.282144	0.582757	33.7567	67.616	0.167297	0.0525466	1.7738	0.285909	0.0525466	3.55299	0.183452
B52	CG10576	chr3L_5755816_5755959_-	0.916053	0.0352806	0.189986	2.91768	5.19486	1.02851	0.911924	2.6607	1.16695	0.911924	4.73732	0.277623
B52	CG10576	chr3L_5758285_5758440_-	0.401047	5.10554	1.45328	19.5296	8.693	1.82722	0.817436	15.9642	1.23667	0.817436	7.10598	0.168933
B52	CG10616	chr3L_12465030_12465121_+	0.253697	0.274615	0.189986	4.96169	4.96923	0.903838	0.714998	3.5476	0.904198	0.714998	3.55299	0.125075
B52	CG10737	chr2R_15051681_15052668_+	0.158302	1.40399	1.99212	3.33235	4.20267	5.53557	4.79067	15.9642	5.81353	4.79067	20.1336	0.067358
B52	CG10737	chr2R_15058881_15059683_+	0.99999	0.844817	0.0282555	3.06776	1.79225	5.2633	4.62565	14.1904	4.86996	4.62565	8.2903	0.367293
B52	CG10737	chr2R_15060427_15060936_+	0.763602	1.39525	0.298692	2.8539	2.06428	8.38025	7.45844	21.2856	7.98763	7.45844	15.3963	0.239384
B52	CG10737	chr2R_15061627_15061843_+	0.337603	0.428851	0.189986	Inf	Inf	0.118253	0	1.7738	0.0789553	0	1.18433	0.154665
B52	CG10907	chr3L_11787277_11787453_+	0.612819	0.258165	0.638088	9.21601	16.4089	0.446837	0.288704	2.6607	0.585278	0.288704	4.73732	0.21055
B52	CG10915	chr2R_14049834_14050356_+	0.0465924	3.73721	4.32057	13.429	16.8118	1.93228	1.0567	14.1904	2.17058	1.0567	17.7649	0.0195089
B52	CG1091	chr3R_2909309_2909411_-	0.835401	0.215835	0.775774	11.7455	39.2111	0.259205	0.15102	1.7738	0.535728	0.15102	5.92165	0.254747
B52	CG1091	chr3R_2909847_2909904_-	0.250222	0.215835	0.189986	Inf	Inf	0.0591267	0	0.8869	0.0789553	0	1.18433	0.122257
B52	CG1091	chr3R_2910490_2910646_-	0.18389	1.01099	0.679881	Inf	Inf	0.17738	0	2.6607	0.157911	0	2.36866	0.0794605
B52	CG1091	chr3R_2911286_2911603_-	0.0840866	2.26673	2.36756	5.12885	5.76745	4.18992	3.28555	16.8511	4.3298	3.28555	18.9493	0.0352586
B52	CG10948	chr3L_12838954_12840149_-	0.187337	1.30337	2.02996	4.72106	6.3043	3.75141	3.00577	14.1904	4.06867	3.00577	18.9493	0.081192
B52	CG10948	chr3L_12840257_12841469_-	0.2937	0.841329	1.52661	2.56609	3.42665	7.25246	6.56684	16.8511	7.6292	6.56684	22.5023	0.142106
B52	CG10962	chrX_8867414_8867687_-	0.226611	1.34839	0.663849	14.501	11.0651	0.813475	0.428131	6.2083	0.71541	0.428131	4.73732	0.101835
B52	CG10973	chr3L_12747317_12747641_-	0.839013	0.0953842	0.335182	3.84387	7.69941	0.548951	0.461462	1.7738	0.667564	0.461462	3.55299	0.25539
B52	CG10984	chr3L_12743956_12744406_+	0.178025	0.967074	1.15162	64.2515	85.7988	0.28804	0.0552143	3.5476	0.367354	0.0552143	4.73732	0.0766896
B52	CG1105	chr3R_2892020_2892645_-	0.0794872	3.87106	2.22976	10.523	8.30341	3.03138	1.85421	19.5118	2.75702	1.85421	15.3963	0.0333957
B52	CG11076	chr4_1051602_1052109_-	0.272938	1.7227	3.99854	3.39178	5.31014	8.79221	7.58307	25.7201	9.76201	7.58307	40.2672	0.134663
B52	CG11089	chr3R_20704550_20704765_+	0.840995	0.450751	1.69771	14.0459	37.5127	0.35418	0.189429	2.6607	0.650532	0.189429	7.10598	0.255758
B52	CG1109	chr3R_1486548_1486633_+	0.164034	0.029036	0.0201653	4.29394	5.73395	0.251904	0.206547	0.8869	0.271732	0.206547	1.18433	0.0699797
B52	CG1109	chr3R_1486971_1487260_+	0.937084	0.249282	0.0332542	3.24447	2.47573	2.19982	1.9135	6.2083	2.10176	1.9135	4.73732	0.285708
B52	CG11107	chr2R_3275934_3276212_+	0.249459	0.0930542	0.0901121	16.0629	21.4497	0.11066	0.0552143	0.8869	0.130489	0.0552143	1.18433	0.119047
B52	CG11107	chr2R_3277016_3277582_+	0.0118066	9.14006	8.61666	20.1281	20.052	6.31588	2.77596	55.8747	6.30179	2.77596	55.6635	0.00501679
B52	CG11151	chrX_13634146_13634710_+	0.194018	0.871058	0.592484	5.68179	5.31106	2.04815	1.56095	8.869	2.00957	1.56095	8.2903	0.0843277
B52	CG11170	chr2R_18066151_18067199_-	0.366981	0.124067	0.189986	4.60095	6.14392	0.717121	0.578294	2.6607	0.776607	0.578294	3.55299	0.161832
B52	CG11178	chrX_13501508_13501715_+	0.250222	0.215835	0.189986	Inf	Inf	0.0591267	0	0.8869	0.0789553	0	1.18433	0.122257
B52	CG11247	chr3L_21720038_21721386_-	0.411997	2.39406	0.759998	3.11723	2.27052	10.7142	9.389	29.2677	10.1843	9.389	21.3179	0.171184
B52	CG11266	chr2L_7033019_7034198_+	0.0448163	4.12713	3.44592	4.92207	4.92954	7.27368	5.76603	28.3808	7.27656	5.76603	28.4239	0.0187483
B52	CG11266	chr2L_7034274_7034483_+	0.40519	0.0418311	0.0901121	2.46421	3.29061	1.18513	1.07974	2.6607	1.24462	1.07974	3.55299	0.170064
B52	CG11266	chr2L_7034913_7035074_+	0.541067	0.539989	0.183651	12.8868	8.60424	0.493444	0.27529	3.5476	0.414848	0.27529	2.36866	0.197051
B52	CG11267	chr3L_13009265_13009456_+	0.135648	2.05346	1.24603	8.1701	6.81876	2.56711	1.73687	14.1904	2.41063	1.73687	11.8433	0.0569403
B52	CG11284	chrX_8575862_8579658_+	0.109676	2.57902	1.60779	3.80265	3.38526	9.13473	7.69666	29.2677	8.92057	7.69666	26.0552	0.0456046
B52	CG11284	chrX_8579824_8580598_+	0.118417	0.00815737	0.0133206	8.23026	10.9903	0.159703	0.107761	0.8869	0.179532	0.107761	1.18433	0.049456
B52	CG1129	chr3R_640496_641008_+	0.0211648	7.29076	5.8755	8.14476	7.76869	6.75189	4.57347	37.2498	6.63723	4.57347	35.5299	0.00895327
B52	CG11334	chr3R_27287901_27288117_-	0.282203	0.284355	0.364362	10.5339	14.0665	0.275417	0.16839	1.7738	0.315075	0.16839	2.36866	0.138322
B52	CG11367	chr3L_22724701_22725116_+	0.131359	0.0148982	0.015574	5.77338	7.70953	0.202504	0.153619	0.8869	0.222333	0.153619	1.18433	0.0550138
B52	CG11377	chr2L_102907_103005_+	0.258132	0.977478	0.485793	Inf	Inf	0.295633	0	4.4345	0.157911	0	2.36866	0.127861
B52	CG11377	chr2L_103435_103515_+	0.887115	1.10538	0.189986	Inf	Inf	0.236507	0	3.5476	0.0789553	0	1.18433	0.26833
B52	CG11399	chr3L_20777722_20779128_-	0.883199	0.446096	0.0887138	1.94576	1.53535	10.6601	10.0279	19.5118	10.3858	10.0279	15.3963	0.267281
B52	CG11412	chrX_1237569_1237811_+	0.121096	1.55592	1.39698	51.929	55.475	0.375336	0.0853955	4.4345	0.395524	0.0853955	4.73732	0.0505449
B52	CG1143	chr3L_2645465_2645632_+	0.195537	0.0447864	0.0379278	9.70889	12.9648	0.144386	0.0913493	0.8869	0.164215	0.0913493	1.18433	0.0853903
B52	CG11448	chrX_1288748_1289115_+	0.403793	0.437965	0.851981	4.6919	7.3096	1.41332	1.13417	5.3214	1.61124	1.13417	8.2903	0.169601
B52	CG11455	chr2L_153301_153538_+	0.998599	0.231064	0.0122736	13.5332	9.03584	0.240586	0.13107	1.7738	0.201287	0.13107	1.18433	0.342866
B52	CG1146:CG45186	chr3L_2489010_2490219_+	0.361065	1.90515	0.670534	2.18704	1.82001	30.1956	27.9813	61.1961	29.511	27.9813	50.9262	0.160376
B52	CG1146	chr3L_2490848_2490979_+	0.441717	0.215835	0.414841	2.34997	3.13806	2.87962	2.64186	6.2083	3.01842	2.64186	8.2903	0.177941
B52	CG11505	chr3L_3225289_3226052_+	0.247143	0.0686785	0.0866787	1.23097	1.34736	44.6266	43.9499	54.1009	44.9676	43.9499	59.2165	0.116543
B52	CG11505	chr3L_3226540_3226876_+	0.999971	0.31173	0.0085334	3.87529	2.58745	1.63638	1.37316	5.3214	1.51848	1.37316	3.55299	0.364005
B52	CG11505	chr3L_3228467_3228621_+	0.255805	0.0904618	0.0901121	16.8784	22.5387	0.10817	0.0525466	0.8869	0.127999	0.0525466	1.18433	0.126305
B52	CG11526	chr3L_3328627_3328698_-	0.999995	0.497417	0.0127298	21.7228	9.66925	0.291698	0.122484	2.6607	0.193274	0.122484	1.18433	0.369009
B52	CG11594	chr3L_4024707_4024944_-	0.243565	0.0981105	0.0901121	13.5148	18.0472	0.120376	0.0656241	0.8869	0.140204	0.0656241	1.18433	0.112589
B52	CG11596	chrX_1821953_1822204_+	0.576633	0.203839	0.0450385	14.234	9.50371	0.234563	0.124618	1.7738	0.195265	0.124618	1.18433	0.203599
B52	CG11596	chrX_1822614_1823033_+	0.260898	0.0926226	0.0971089	5.91961	7.9048	0.397925	0.299648	1.7738	0.437582	0.299648	2.36866	0.129475
B52	CG1161	chr3R_1181273_1181555_+	0.891246	3.08085	0.537216	33.814	12.3147	0.919675	0.288516	9.7559	0.506148	0.288516	3.55299	0.269239
B52	CG11652	chr3L_11688679_11689450_-	0.643803	0.565436	0.158878	5.13838	3.43079	1.76178	1.38082	7.0952	1.60459	1.38082	4.73732	0.216764
B52	CG11671	chr3R_4113963_4114019_+	0.300005	0.375692	0.189986	Inf	Inf	0.118253	0	1.7738	0.0789553	0	1.18433	0.143993
B52	CG11710	chrX_20299727_20299845_-	0.243818	0.0976281	0.0901121	11.5468	15.4191	0.130815	0.0768094	0.8869	0.150644	0.0768094	1.18433	0.11272
B52	CG1172	chr3R_1219825_1219952_+	0.999999	0.515689	0.00969232	13.215	5.88226	0.365297	0.201339	2.6607	0.266872	0.201339	1.18433	0.3727
B52	CG1172	chr3R_1220450_1221244_+	0.251085	0.679207	0.38441	4.77849	4.254	2.0912	1.67042	7.9821	2.03279	1.67042	7.10598	0.123219
B52	CG1172	chr3R_1221486_1221728_+	0.230213	0.549204	0.647947	31.1574	41.6062	0.257083	0.0853955	2.6607	0.316568	0.0853955	3.55299	0.103821
B52	CG11753	chr3R_4479200_4479267_+	0.484101	0.278212	0.0901121	27.0297	18.0472	0.179503	0.0656241	1.7738	0.140204	0.0656241	1.18433	0.186385
B52	CG11876	chr3R_24939878_24940150_+	0.997808	1.89322	0.180557	9.11881	3.65306	1.49903	0.972605	8.869	1.14463	0.972605	3.55299	0.338413
B52	CG11880	chr3R_24949827_24951126_+	0.0768545	3.66632	2.22319	7.23057	6.03462	4.16662	2.94384	21.2856	3.93191	2.94384	17.7649	0.0321601
B52	CG11883	chr2R_6505342_6507395_+	0.979542	0.0301294	0.214551	2.13749	3.42518	2.23195	2.07463	4.4345	2.41005	2.07463	7.10598	0.310891
B52	CG11883	chr2R_6507505_6509707_+	0.492169	0.0759114	0.162339	2.3742	3.17041	2.0389	1.86778	4.4345	2.13804	1.86778	5.92165	0.188
B52	CG11883	chr2R_6525234_6525460_+	0.447779	0.551588	0.189986	Inf	Inf	0.118253	0	1.7738	0.0789553	0	1.18433	0.179383
B52	CG11897	chr3R_24984413_24985898_+	0.0592369	3.09485	3.32358	5.03491	5.63899	6.92954	5.46065	27.4939	7.14945	5.46065	30.7926	0.0247682
B52	CG11961	chr2R_15246006_15246690_+	0.250222	0.215835	0.189986	Inf	Inf	0.0591267	0	0.8869	0.0789553	0	1.18433	0.122257
B52	CG11984	chr3R_4838028_4838558_-	0.0475029	3.77455	3.43806	14.1019	14.6464	2.12087	1.13206	15.9642	2.16196	1.13206	16.5806	0.0199876
B52	CG11984	chr3R_4839215_4839300_-	0.230093	0.590742	0.731416	16.3971	21.896	0.328829	0.162267	2.6607	0.388315	0.162267	3.55299	0.103763
B52	CG11984	chr3R_4839366_4839561_-	0.851485	0.21395	0.682582	4.62303	9.2601	0.952724	0.767375	3.5476	1.18995	0.767375	7.10598	0.258627
B52	CG11984	chr3R_4840096_4840474_-	0.185772	0.881299	0.646214	5.02356	4.87873	2.46295	1.94203	9.7559	2.4442	1.94203	9.47463	0.0804055
B52	CG12003	chr3L_1565568_1566171_+	0.280189	0.220486	0.128324	3.94684	3.51363	2.41972	2.0224	7.9821	2.36131	2.0224	7.10598	0.137784
B52	CG12004	chr3L_1569542_1571900_+	0.104367	1.96452	1.59874	5.6769	5.68552	3.27906	2.49968	14.1904	3.28049	2.49968	14.212	0.0435934
B52	CG12004	chr3L_1572783_1572968_+	0.907476	0.0899979	0.351287	16.8784	45.0773	0.10817	0.0525466	0.8869	0.206954	0.0525466	2.36866	0.274863
B52	CG12004	chr3L_1573309_1573545_+	0.99981	0.419774	0.0179981	22.8586	10.1748	0.286019	0.116398	2.6607	0.187594	0.116398	1.18433	0.356327
B52	CG12014	chr3L_3378489_3378550_+	0.249459	0.0930542	0.0901121	16.8784	22.5387	0.10817	0.0525466	0.8869	0.127999	0.0525466	1.18433	0.119047
B52	CG12025	chr3L_1865918_1867140_+	0.157164	1.34386	1.82836	2.90061	3.45835	9.64617	8.56138	24.8332	9.9645	8.56138	29.6082	0.0667569
B52	CG12054	chr3R_27047188_27050638_+	0.424218	0.0897072	0.168485	1.37151	1.53446	24.519	23.9264	32.8153	24.7789	23.9264	36.7142	0.174056
B52	CG12065	chrX_8468441_8469380_+	0.00195083	22.0558	20.2059	9.46233	9.5786	18.1793	11.6225	109.976	18.2694	11.6225	111.327	0.000866337
B52	CG12065	chrX_8478289_8478488_+	1	0.772038	0.0107122	18.2064	6.07803	0.418371	0.194854	3.5476	0.260819	0.194854	1.18433	0.377285
B52	CG12065	chrX_8478957_8479842_+	0.0426963	4.94807	8.86619	11.2164	19.1717	3.32317	1.97679	22.1725	4.37158	1.97679	37.8985	0.0179026
B52	CG12065	chrX_8480279_8480584_+	0.2584	2.08543	5.21039	17.6121	41.1573	0.849016	0.40286	7.0952	1.48138	0.40286	16.5806	0.128092
B52	CG12065	chrX_8480642_8481290_+	0.021444	6.29556	6.54366	12.5729	14.5994	2.87418	1.62243	20.3987	3.09338	1.62243	23.6866	0.00905564
B52	CG12071	chr3R_26705629_26706484_-	0.978318	0.314968	0.0336109	6.21321	4.14843	0.769418	0.570977	3.5476	0.690822	0.570977	2.36866	0.309779
B52	CG12075	chrX_8762258_8763246_+	0.150458	0.0218281	0.0207571	7.96864	10.641	0.163006	0.111299	0.8869	0.182834	0.111299	1.18433	0.0638013
B52	CG12082	chr3L_3148135_3148248_-	0.999962	0.53941	0.0185954	18.195	6.07421	0.418485	0.194977	3.5476	0.260934	0.194977	1.18433	0.363028
B52	CG12090	chr3L_1525393_1525641_-	0.0614758	3.16495	2.67448	10.3021	10.3178	2.23162	1.37742	14.1904	2.23306	1.37742	14.212	0.0258426
B52	CG12090	chr3L_1525704_1526333_-	0.0183462	8.96446	6.39371	11.2118	9.74904	5.71717	3.40149	38.1367	5.38547	3.40149	33.1612	0.00778951
B52	CG12090	chr3L_1526399_1526659_-	0.122217	3.50123	1.73985	9.96577	7.39326	2.55939	1.6019	15.9642	2.28466	1.6019	11.8433	0.0509901
B52	CG12090	chr3L_1526753_1527189_-	0.0168223	7.15347	8.33774	8.78596	10.7547	5.52032	3.63403	31.9284	5.99728	3.63403	39.0829	0.00721674
B52	CG12090	chr3L_1528077_1529105_-	0.0120699	10.0883	8.08703	9.58433	9.06561	6.98372	4.44175	42.5712	6.83012	4.44175	40.2672	0.00511413
B52	CG12090	chr3L_1529229_1529438_-	0.239236	2.48309	1.01903	18.8156	12.5628	1.03121	0.471364	8.869	0.834716	0.471364	5.92165	0.10937
B52	CG12090	chr3L_1531260_1531390_-	0.44535	1.16914	2.99708	23.3728	54.6193	0.378171	0.151784	3.5476	0.694352	0.151784	8.2903	0.17885
B52	CG12155	chrX_7623408_7623694_+	0.223766	0.526889	0.387593	8.10365	8.11595	0.6451	0.437778	3.5476	0.645459	0.437778	3.55299	0.100383
B52	CG12163	chr3R_1064920_1065213_-	0.265148	0.152065	0.168485	8.15887	10.895	0.321167	0.217408	1.7738	0.360824	0.217408	2.36866	0.131499
B52	CG12163	chr3R_1066458_1068873_-	0.190241	0.740754	0.736632	4.30919	4.70808	2.76344	2.26397	9.7559	2.82364	2.26397	10.659	0.0824344
B52	CG12219	chrX_6193558_6193640_-	0.262431	0.305808	0.189986	Inf	Inf	0.118253	0	1.7738	0.0789553	0	1.18433	0.130297
B52	CG12224	chr3R_7806577_7806733_-	0.142171	0.017638	0.0184908	8.03144	10.7249	0.162193	0.110429	0.8869	0.182022	0.110429	1.18433	0.0599157
B52	CG12262	chr3L_7712558_7713159_+	0.057448	5.69238	3.07156	12.7143	9.59636	2.85734	1.60439	20.3987	2.52385	1.60439	15.3963	0.0240454
B52	CG12316	chr3L_15129458_15129573_-	0.978413	0.215835	0.020467	10.9355	7.30144	0.269645	0.162205	1.7738	0.230347	0.162205	1.18433	0.309973
B52	CG12333	chr3R_14227916_14228035_-	0.250222	0.215835	0.189986	Inf	Inf	0.0591267	0	0.8869	0.0789553	0	1.18433	0.122257
B52	CG12384	chr2R_7245930_7246462_-	0.220094	0.715004	0.94373	2.56873	3.02663	6.48339	5.86954	15.0773	6.66257	5.86954	17.7649	0.098229
B52	CG12393	chr2L_6049633_6050073_+	0.994138	0.56901	0.049177	8.53076	3.79721	0.936964	0.62379	5.3214	0.740114	0.62379	2.36866	0.328976
B52	CG12404	chr2L_12994238_12997461_-	0.202267	0.710872	0.815629	2.81907	3.22669	4.93864	4.4045	12.4166	5.05833	4.4045	14.212	0.0887851
B52	CG12404	chr2L_12997924_12999726_-	0.00594818	14.0741	11.3281	17.5385	16.214	5.52886	2.62957	46.1188	5.29666	2.62957	42.6359	0.00247684
B52	CG1240	chr3L_2767143_2767216_+	0.263088	0.995764	0.486666	9.54616	7.08197	1.31255	0.836158	7.9821	1.17519	0.836158	5.92165	0.130593
B52	CG12502	chr3L_866860_867941_+	0.0493808	12.2428	5.02994	6.27546	4.14767	18.9123	13.9915	87.8031	16.9275	13.9915	58.0321	0.020726
B52	CG12502	chr3L_868759_868935_+	0.112587	4.26749	2.01129	7.09533	5.10182	4.57057	3.24994	23.0594	4.13865	3.24994	16.5806	0.0468191
B52	CG12576	chrX_21882735_21883750_-	0.629767	0.0812951	0.189986	1.98791	2.65457	3.32872	3.12303	6.2083	3.46752	3.12303	8.2903	0.214172
B52	CG12582	chr3R_23594_23942_+	0.531477	0.771285	2.00596	6.87689	12.6268	1.43598	1.03175	7.0952	1.83147	1.03175	13.0276	0.19519
B52	CG12582	chr3R_25016_27564_+	0.13187	1.42305	1.61562	2.27456	2.47947	20.7297	19.1062	43.4581	20.9907	19.1062	47.3732	0.0553718
B52	CG12582	chr3R_28520_29503_+	0.999976	0.0297539	0.611289	1.80046	3.43465	3.63219	3.44818	6.2083	4.00785	3.44818	11.8433	0.364851
B52	CG1265	chr3L_4255296_4255609_+	0.244467	0.326777	0.317676	4.21272	4.68791	1.53372	1.26317	5.3214	1.57374	1.26317	5.92165	0.113391
B52	CG12746	chr3R_1391176_1391809_+	0.12355	7.63468	2.72934	15.8454	8.46372	3.89785	1.95902	31.0415	2.9338	1.95902	16.5806	0.0514744
B52	CG12766	chr3L_3939888_3940006_-	0.721619	0.215835	0.640344	Inf	Inf	0.0591267	0	0.8869	0.236866	0	3.55299	0.230499
B52	CG12768	chr3L_22903673_22903932_+	0.703654	1.62425	0.38441	3.10028	2.16856	6.84866	6.0075	18.6249	6.47551	6.0075	13.0276	0.226366
B52	CG12768	chr3L_22904252_22904689_+	0.756472	2.07017	0.451484	6.11215	3.54865	4.47482	3.3374	20.3987	3.90446	3.3374	11.8433	0.237902
B52	CG12768	chr3L_22907859_22916461_+	0.821755	1.63881	0.325183	2.20175	1.67283	25.2351	23.3633	51.4402	24.4113	23.3633	39.0829	0.251327
B52	CG12822	chr2R_3719871_3719960_+	0.0543717	3.4004	3.06257	28.0859	28.8498	1.15179	0.410515	11.5297	1.1727	0.410515	11.8433	0.0226698
B52	CG12868	chr2R_10492611_10492671_-	0.994806	0.215835	0.0146279	9.75156	6.51091	0.288026	0.181899	1.7738	0.248728	0.181899	1.18433	0.330517
B52	CG12877	chr3R_23535090_23535347_+	0.252303	0.0923842	0.0901121	16.0629	21.4497	0.11066	0.0552143	0.8869	0.130489	0.0552143	1.18433	0.124157
B52	CG12883	chr3R_23505153_23505222_+	0.247888	0.0942022	0.0901121	13.5148	18.0472	0.120376	0.0656241	0.8869	0.140204	0.0656241	1.18433	0.117209
B52	CG12920	chr2R_5956891_5957424_+	0.145226	0.019203	0.0190319	7.87521	10.5162	0.164238	0.112619	0.8869	0.184067	0.112619	1.18433	0.0612222
B52	CG12926	chr2R_5496948_5497644_-	0.366948	0.950179	2.03444	4.12103	6.60366	2.59993	2.15213	8.869	2.95612	2.15213	14.212	0.161811
B52	CG12974	chr3L_21275755_21276245_-	0.211236	1.26172	2.1026	4.9908	7.27036	2.47485	1.95478	9.7559	2.77192	1.95478	14.212	0.0930024
B52	CG13085:CG16771	chr2L_19426895_19427086_+	0.95083	0.0306822	0.193215	1.94916	3.03663	2.90285	2.7301	5.3214	3.10078	2.7301	8.2903	0.292457
B52	CG13096	chr2L_8510179_8510526_-	0.54227	3.746	0.9649	53.7465	19.1389	1.11792	0.247523	13.3035	0.546843	0.247523	4.73732	0.197298
B52	CG13124	chr2L_9905292_9905874_-	0.131981	1.5172	1.17555	7.25011	6.91535	2.42621	1.71261	12.4166	2.38799	1.71261	11.8433	0.0554282
B52	CG13124	chr2L_9906444_9907050_-	0.388672	0.484364	0.189986	6.77864	5.43115	0.906208	0.654187	4.4345	0.847441	0.654187	3.55299	0.16638
B52	CG13124	chr2L_9907856_9908307_-	0.0436284	3.90551	3.94019	4.47613	4.87617	9.27417	7.52931	33.7022	9.47497	7.52931	36.7142	0.0182615
B52	CG13148	chr2R_8574585_8575101_+	0.783449	0.215835	0.705894	Inf	Inf	0.0591267	0	0.8869	0.236866	0	3.55299	0.243691
B52	CG1316	chr3L_4285273_4285424_+	0.407154	0.816308	1.80995	7.24206	13.539	0.867138	0.612326	4.4345	1.12419	0.612326	8.2903	0.170458
B52	CG1316	chr3L_4285921_4286171_+	0.0115159	9.33171	8.63676	11.9382	12.4949	4.7532	2.74877	32.8153	4.85522	2.74877	34.3455	0.00492132
B52	CG13197	chr2R_7579081_7579472_+	0.0796457	2.86922	2.05938	46.9603	39.9056	0.844291	0.207748	9.7559	0.746585	0.207748	8.2903	0.0334771
B52	CG13197	chr2R_7580051_7581978_+	0.00754728	11.4776	10.7098	14.2026	14.1233	11.0365	5.86997	83.3686	11.0055	5.86997	82.903	0.00320669
B52	CG13204	chr2R_7255906_7256052_+	0.699958	0.165094	0.0332542	5.18005	4.61148	0.656781	0.513644	2.6607	0.637311	0.513644	2.36866	0.225693
B52	CG13313	chr3L_8952291_8952897_+	0.999664	0.0343899	0.510179	7.76568	41.4799	0.16572	0.114208	0.8869	0.422415	0.114208	4.73732	0.35345
B52	CG13366	chrX_510004_511307_-	0.994191	0.0967632	0.707625	1.61077	2.50944	10.3145	9.91093	15.9642	10.9083	9.91093	24.8709	0.329117
B52	CG13384	chr2L_8385098_8386138_+	0.293217	0.902129	0.409736	2.69395	2.24837	11.7247	10.535	28.3808	11.4118	10.535	23.6866	0.141811
B52	CG1354	chrX_9673276_9674219_+	0.00056452	35.385	34.224	29.7411	30.2493	16.7831	5.75539	171.172	16.9781	5.75539	174.096	0.000261979
B52	CG1354	chrX_9674926_9675191_+	0.276181	0.341039	0.189986	Inf	Inf	0.118253	0	1.7738	0.0789553	0	1.18433	0.136111
B52	CG13551	chr2R_19265701_19266095_-	0.976939	1.0019	0.116956	6.35227	3.08456	2.08382	1.53581	9.7559	1.74925	1.53581	4.73732	0.308472
B52	CG13551	chr2R_19267962_19268719_-	0.0933421	2.32017	3.17249	9.21561	12.3061	2.23425	1.44358	13.3035	2.53167	1.44358	17.7649	0.0387877
B52	CG13585	chr2R_20420167_20420419_+	0.151885	0.0221416	0.0209875	7.95141	10.618	0.163231	0.11154	0.8869	0.183059	0.11154	1.18433	0.0644179
B52	CG1358	chr2R_3485863_3489936_-	0.0407608	5.54994	3.65477	7.32688	6.2718	6.71207	4.72085	34.5891	6.38001	4.72085	29.6082	0.0171926
B52	CG1358	chr2R_3490162_3490626_-	0.425603	0.527514	0.189986	Inf	Inf	0.118253	0	1.7738	0.0789553	0	1.18433	0.174299
B52	CG1358	chr2R_3493750_3495926_-	0.308252	0.313544	0.4465	2.58975	3.11242	3.78761	3.42465	8.869	3.90694	3.42465	10.659	0.14657
B52	CG13605	chr3R_19936271_19936484_-	0.249459	0.0930542	0.0901121	15.4499	20.6311	0.112705	0.057405	0.8869	0.132533	0.057405	1.18433	0.119047
B52	CG13759	chrX_2475146_2476509_+	0.21525	1.77944	3.67991	8.42342	14.9977	1.88877	1.26348	10.6428	2.44253	1.26348	18.9493	0.0953603
B52	CG13759	chrX_2476860_2477021_+	0.250222	0.215835	0.189986	Inf	Inf	0.0591267	0	0.8869	0.0789553	0	1.18433	0.122257
B52	CG13795	chr2L_7724302_7724368_-	0.250222	0.215835	0.189986	Inf	Inf	0.0591267	0	0.8869	0.0789553	0	1.18433	0.122257
B52	CG13807	chr3L_2263295_2263355_+	0.217311	0.0714563	0.059108	9.70889	12.9648	0.144386	0.0913493	0.8869	0.164215	0.0913493	1.18433	0.0966119
B52	CG13868	chr2R_16199015_16200524_-	0.999991	0.139396	2.3055	2.23358	6.39135	3.00811	2.77953	6.2083	3.77855	2.77953	17.7649	0.367713
B52	CG13893	chr3L_600913_603370_-	0.030432	5.51168	4.56329	7.21449	7.08377	5.91139	4.17973	30.1546	5.87496	4.17973	29.6082	0.012981
B52	CG13895	chr3L_707700_707889_-	0.34426	0.304546	0.487337	4.58777	6.12632	1.43734	1.15991	5.3214	1.55631	1.15991	7.10598	0.156293
B52	CG13917	chr3L_1577132_1588752_+	0.137811	1.42255	1.10813	2.29818	2.26832	19.2884	17.752	40.7974	19.253	17.752	40.2672	0.05789
B52	CG13982	chr2L_6412859_6413180_+	0.243355	0.0986259	0.0901121	16.8784	22.5387	0.10817	0.0525466	0.8869	0.127999	0.0525466	1.18433	0.112477
B52	CG1399	chr2R_3572269_3572478_-	0.261142	0.0879552	0.0901121	16.8784	22.5387	0.10817	0.0525466	0.8869	0.127999	0.0525466	1.18433	0.129623
B52	CG1399	chr2R_3574460_3575700_-	0.856812	1.1468	5.01819	8.17293	24.556	1.28327	0.868134	7.0952	2.23145	0.868134	21.3179	0.260211
B52	CG14073	chr3L_18813011_18813499_-	0.148384	1.6446	1.04335	3.64789	3.31245	7.15112	6.07817	22.1725	7.01519	6.07817	20.1336	0.0627634
B52	CG1407	chr2R_5918174_5918589_-	0.129191	1.42812	1.51226	11.6782	13.6453	1.04007	0.607557	7.0952	1.11974	0.607557	8.2903	0.0540532
B52	CG1407	chr2R_5919332_5919523_-	0.250222	0.215835	0.189986	Inf	Inf	0.0591267	0	0.8869	0.0789553	0	1.18433	0.122257
B52	CG1416	chr2L_21758360_21758441_+	0.258569	0.446096	0.265352	23.8542	21.236	0.281484	0.11154	2.6607	0.262015	0.11154	2.36866	0.12819
B52	CG1416	chr2L_21759079_21759230_+	0.314663	0.792081	1.48196	4.28963	6.36466	2.26888	1.86079	7.9821	2.52629	1.86079	11.8433	0.148582
B52	CG14184	chr3L_20021479_20021745_-	0.982277	0.0807782	0.457894	15.4499	41.2622	0.112705	0.057405	0.8869	0.211489	0.057405	2.36866	0.313447
B52	CG14200	chrX_19409678_19409945_+	0.126805	1.52893	1.2656	7.3469	7.35806	2.06156	1.44861	10.6428	2.06263	1.44861	10.659	0.0531175
B52	CG14207	chrX_19499716_19503495_+	0.276205	0.130814	0.158769	1.50347	1.67306	10.9746	10.6182	15.9642	11.0947	10.6182	17.7649	0.136144
B52	CG14232	chrX_19597231_19597435_-	0.486136	0.27902	0.0901121	33.7567	22.5387	0.167297	0.0525466	1.7738	0.127999	0.0525466	1.18433	0.186689
B52	CG14275	chr2L_8327584_8329047_+	0.118481	2.03288	1.37868	3.27809	3.0225	13.089	11.3633	37.2498	12.8954	11.3633	34.3455	0.0494928
B52	CG14275	chr2L_8329175_8329647_+	0.160837	1.10095	0.861649	6.48559	6.49544	1.49408	1.094	7.0952	1.49479	1.094	7.10598	0.068657
B52	CG14341	chr2L_1166923_1166982_+	0.260099	0.409593	0.238944	18.4273	16.4047	0.312143	0.144389	2.6607	0.292674	0.144389	2.36866	0.128948
B52	CG14407	chrX_14731787_14731846_-	0.273103	0.215835	0.236984	13.7125	18.3112	0.238986	0.129356	1.7738	0.278643	0.129356	2.36866	0.134812
B52	CG14408	chrX_14722065_14722693_-	0.471523	0.377407	0.812593	3.72931	5.97595	1.40546	1.1891	4.4345	1.58355	1.1891	7.10598	0.183854
B52	CG14408	chrX_14724381_14724465_-	0.250222	0.215835	0.189986	Inf	Inf	0.0591267	0	0.8869	0.0789553	0	1.18433	0.122257
B52	CG14408	chrX_14724541_14725124_-	0.334593	0.269594	0.417038	5.88849	7.86325	0.798806	0.602463	3.5476	0.87812	0.602463	4.73732	0.153891
B52	CG1440	chrX_8331854_8332740_+	0.123034	2.04416	3.17472	9.03051	13.2649	1.50791	0.982115	8.869	1.78515	0.982115	13.0276	0.0512879
B52	CG14411	chrX_14726994_14727176_+	1	0.70058	0.00410216	19.8243	8.82416	0.302647	0.134214	2.6607	0.204222	0.134214	1.18433	0.381602
B52	CG1441	chr2R_5788375_5788480_-	0.250222	0.215835	0.189986	Inf	Inf	0.0591267	0	0.8869	0.0789553	0	1.18433	0.122257
B52	CG14435	chrX_6734468_6735501_-	0.956243	0.215835	1.08415	2.42492	4.6773	3.60439	3.2917	7.9821	4.09867	3.2917	15.3963	0.294903
B52	CG14442	chrX_6586147_6586435_-	0.252373	0.209527	0.1394	3.38114	3.61203	1.51974	1.31154	4.4345	1.53993	1.31154	4.73732	0.124224
B52	CG1444	chrX_7803571_7803910_+	0.999999	0.677738	0.0146122	21.8711	7.30144	0.387898	0.162205	3.5476	0.230347	0.162205	1.18433	0.372246
B52	CG1444	chrX_7803958_7804741_+	0.359169	0.451127	0.811575	2.81861	3.76385	3.52808	3.14659	8.869	3.72637	3.14659	11.8433	0.159984
B52	CG14459	chr3L_22608895_22630294_-	0.0506115	3.78961	3.0839	3.73675	3.64647	14.5937	12.3419	46.1188	14.5194	12.3419	45.0045	0.0212838
B52	CG14476	chrX_21474758_21475489_-	0.696643	0.215835	0.614507	3.78263	6.0614	1.38981	1.17233	4.4345	1.56791	1.17233	7.10598	0.224982
B52	CG14509	chr3R_25001151_25002267_-	0.134334	0.017071	0.015574	5.01141	6.69202	0.224304	0.176976	0.8869	0.244133	0.176976	1.18433	0.0563527
B52	CG14562	chr3L_21935555_21936836_+	0.626887	0.545792	1.54285	9.8717	19.7734	0.571919	0.359371	3.5476	0.809144	0.359371	7.10598	0.213569
B52	CG14562	chr3L_21939219_21939892_+	0.463177	0.431029	0.160838	4.84258	3.87994	1.15032	0.915732	4.4345	1.09155	0.915732	3.55299	0.18223
B52	CG1458	chr3R_25048492_25048964_-	0.0612928	4.42965	2.69741	25.0579	18.822	1.47458	0.566305	14.1904	1.23915	0.566305	10.659	0.0257971
B52	CG14615	chrX_21849973_21850367_-	0.1475	0.0208677	0.0196803	7.33956	9.80094	0.171909	0.120838	0.8869	0.191738	0.120838	1.18433	0.0621273
B52	CG14619	chrX_21858396_21858726_+	0.34037	0.0328942	0.077404	4.21603	5.62991	0.510933	0.420728	1.7738	0.55059	0.420728	2.36866	0.155152
B52	CG14619	chrX_21860097_21864235_+	0.141739	1.88571	3.11091	2.71036	3.3931	17.4978	15.7068	42.5712	18.2127	15.7068	53.2948	0.0596287
B52	CG14647	chr3R_226861_227075_+	0.412967	0.426422	0.181047	5.60165	4.48812	1.0345	0.791642	4.4345	0.975732	0.791642	3.55299	0.171396
B52	CG14696	chr3R_6709637_6710441_-	0.532169	6.61644	1.57996	5.31271	3.07423	12.8962	10.0164	53.214	11.4014	10.0164	30.7926	0.195342
B52	CG14757	chr2R_4060277_4060677_-	0.25801	0.0897072	0.0901121	15.4499	20.6311	0.112705	0.057405	0.8869	0.132533	0.057405	1.18433	0.127811
B52	CG14764	chr2R_3839547_3841406_-	0.513726	0.0931102	0.189986	2.09452	2.79693	2.72602	2.54063	5.3214	2.84499	2.54063	7.10598	0.192154
B52	CG14767	chr2R_4609130_4610761_-	0.999642	3.81012	0.255892	4.28884	2.0045	10.0853	8.2717	35.476	8.82563	8.2717	16.5806	0.353187
B52	CG14767	chr2R_4611003_4611210_-	0.709691	0.217561	0.632624	3.30683	5.51975	1.2378	1.07281	3.5476	1.39607	1.07281	5.92165	0.227882
B52	CG14777	chrX_1360967_1361525_+	0.168125	6.88001	2.33868	10.424	5.96564	4.84878	2.97788	31.0415	3.96368	2.97788	17.7649	0.0719357
B52	CG14777	chrX_1362219_1362283_+	0.250222	0.215835	0.189986	Inf	Inf	0.0591267	0	0.8869	0.0789553	0	1.18433	0.122257
B52	CG14921	chr2L_11121299_11121418_-	0.0645389	4.11947	2.55072	34.614	25.9999	1.32866	0.409961	14.1904	1.09323	0.409961	10.659	0.0272281
B52	CG14995	chr3L_4096068_4096903_-	0.998795	0.0574692	0.571948	1.88709	3.59991	3.48445	3.28989	6.2083	3.86011	3.28989	11.8433	0.344128
B52	CG15019	chr3L_4405616_4405784_-	0.253941	1.30342	0.595168	16.6253	11.1004	1.08917	0.533463	8.869	0.892675	0.533463	5.92165	0.125242
B52	CG15083	chr2R_14723018_14723784_+	0.998909	2.47164	0.189986	4.74279	2.47826	5.37417	4.30099	20.3987	4.72485	4.30099	10.659	0.344713
B52	CG15097	chr2R_14712306_14713001_-	0.00888985	10.612	15.8515	27.0854	44.3358	2.78034	1.01508	27.4939	3.94771	1.01508	45.0045	0.00378283
B52	CG15097	chr2R_14713244_14713523_-	0.999674	0.401621	0.0184908	20.1532	8.97058	0.300602	0.132024	2.6607	0.202177	0.132024	1.18433	0.353581
B52	CG15097	chr2R_14713724_14716975_-	0.090191	2.23994	2.76647	4.28302	5.02611	8.32904	6.83342	29.2677	8.66756	6.83342	34.3455	0.0377756
B52	CG15098	chr2R_14721290_14721469_-	0.211251	0.579901	0.471629	3.34272	3.47179	2.76085	2.38791	7.9821	2.7814	2.38791	8.2903	0.0930221
B52	CG15098	chr2R_14721624_14721815_-	0.99869	0.612347	0.039291	6.54725	3.49717	0.927787	0.677307	4.4345	0.790064	0.677307	2.36866	0.343317
B52	CG15098	chr2R_14721902_14721980_-	0.747293	0.355378	0.089166	33.7567	22.5387	0.167297	0.0525466	1.7738	0.127999	0.0525466	1.18433	0.23593
B52	CG15099	chr2R_14733465_14734002_-	0.195444	0.700775	0.580958	3.16341	3.24945	4.17037	3.64471	11.5297	4.19128	3.64471	11.8433	0.085351
B52	CG15111	chr2R_15025767_15026645_+	0.225797	0.487853	0.515218	3.62647	4.15083	2.0117	1.71194	6.2083	2.07154	1.71194	7.10598	0.101409
B52	CG1513	chr2R_5771712_5772126_-	0.0603104	10.3571	4.13868	35.0523	16.9027	2.97871	0.91088	31.9284	1.87657	0.91088	15.3963	0.025299
B52	CG1513	chr2R_5777241_5777382_-	0.126417	1.45949	1.41383	39.6485	44.1208	0.480027	0.134214	5.3214	0.520043	0.134214	5.92165	0.0528746
B52	CG1513	chr2R_5778647_5778739_-	0.130591	1.40167	1.36116	44.0373	49.0047	0.467543	0.120838	5.3214	0.507559	0.120838	5.92165	0.0546743
B52	CG1516	chr2R_5741236_5742015_-	0.36318	0.215835	0.348822	3.5714	4.76909	1.45453	1.24167	4.4345	1.55367	1.24167	5.92165	0.161018
B52	CG1518	chrX_20922006_20922152_-	0.599212	0.350482	0.0930002	11.9758	7.99601	0.512988	0.29623	3.5476	0.434392	0.29623	2.36866	0.207908
B52	CG1518	chrX_20922762_20922942_-	0.499266	0.294686	0.641805	9.28473	16.5313	0.444843	0.286567	2.6607	0.583284	0.286567	4.73732	0.189017
B52	CG15312	chrX_9951763_9953723_-	0.708849	0.214753	0.54397	1.6825	2.24675	11.0223	10.5426	17.738	11.4189	10.5426	23.6866	0.227642
B52	CG1532	chrX_20898049_20898764_-	0.239817	0.332898	0.278071	5.37671	5.74387	1.06541	0.82476	4.4345	1.0856	0.82476	4.73732	0.109636
B52	CG1532	chrX_20898980_20899206_-	0.181661	0.819124	0.775021	7.93369	8.8286	0.980779	0.670735	5.3214	1.0208	0.670735	5.92165	0.078457
B52	CG15356	chr2L_1979203_1979909_-	0.248959	0.274439	0.2631	3.6278	4.03702	1.72381	1.46684	5.3214	1.76383	1.46684	5.92165	0.118461
B52	CG15602	chrX_15694071_15694128_+	0.539984	0.215835	0.494746	Inf	Inf	0.0591267	0	0.8869	0.157911	0	2.36866	0.196836
B52	CG15715	chr3L_15830030_15830191_-	0.286695	0.215835	0.114943	3.32738	3.33243	1.23161	1.06618	3.5476	1.23197	1.06618	3.55299	0.139884
B52	CG15735	chrX_11913359_11913660_+	0.0399581	5.69261	3.71166	19.3338	16.1359	1.63107	0.73397	14.1904	1.47459	0.73397	11.8433	0.0169513
B52	CG15771	chrX_5650885_5651894_+	0.104637	1.81357	1.94612	6.40143	7.32703	2.63812	1.93966	12.4166	2.75781	1.93966	14.212	0.0436468
B52	CG15772	chrX_5646795_5646896_+	0.251784	0.0926761	0.0901121	15.0339	20.0756	0.114187	0.0589934	0.8869	0.134016	0.0589934	1.18433	0.123756
B52	CG1578	chrX_11706637_11707320_-	0.237098	2.01224	0.871941	8.98127	6.45788	1.96681	1.28375	11.5297	1.75085	1.28375	8.2903	0.10802
B52	CG1578	chrX_11708915_11709202_-	0.50094	0.287126	0.0901121	27.0297	18.0472	0.179503	0.0656241	1.7738	0.140204	0.0656241	1.18433	0.189387
B52	CG1578	chrX_11709777_11710454_-	0.0819145	2.54126	2.0219	3.66407	3.62433	7.69616	6.53544	23.9463	7.67885	6.53544	23.6866	0.034347
B52	CG15814	chrX_17743882_17743940_-	0.250222	0.215835	0.189986	Inf	Inf	0.0591267	0	0.8869	0.0789553	0	1.18433	0.122257
B52	CG15817	chr3R_25055300_25056046_+	0.999983	0.0368391	0.801263	1.78672	4.43098	3.65693	3.47469	6.2083	4.26947	3.47469	15.3963	0.365948
B52	CG1582	chrX_10793097_10793156_-	0.362484	0.215835	0.348209	Inf	Inf	0.0591267	0	0.8869	0.157911	0	2.36866	0.160831
B52	CG1622	chrX_13192221_13192738_+	0.211842	1.30202	0.679188	16.0825	12.2719	0.774181	0.386029	6.2083	0.676115	0.386029	4.73732	0.093455
B52	CG1628	chrX_10493330_10495075_-	0.177938	0.855408	0.750845	12.198	13.0309	0.634941	0.363544	4.4345	0.655129	0.363544	4.73732	0.0766504
B52	CG1632	chrX_8165443_8165972_+	0.999065	0.017071	0.2475	6.15359	16.4345	0.193645	0.144127	0.8869	0.292429	0.144127	2.36866	0.345789
B52	CG1636	chrX_8167840_8168312_+	0.427352	0.215835	0.405475	Inf	Inf	0.0591267	0	0.8869	0.157911	0	2.36866	0.17464
B52	CG1640	chrX_13272309_13272579_+	0.370082	0.464657	0.189986	Inf	Inf	0.118253	0	1.7738	0.0789553	0	1.18433	0.162631
B52	CG1667	chr2R_5730346_5731241_+	0.367643	0.488703	0.912287	2.07342	2.63033	9.16713	8.55493	17.738	9.48475	8.55493	22.5023	0.162062
B52	CG16710	chr3R_19508301_19508491_+	0.372568	0.590742	1.16008	Inf	Inf	0.118253	0	1.7738	0.236866	0	3.55299	0.163076
B52	CG16779	chr3R_5312926_5319117_-	0.356355	0.231103	0.0985094	1.5465	1.48432	19.0202	18.3516	28.3808	18.9441	18.3516	27.2396	0.159042
B52	CG1677	chrX_7175783_7175855_-	0.371039	0.224387	0.0901121	27.0297	18.0472	0.179503	0.0656241	1.7738	0.140204	0.0656241	1.18433	0.162821
B52	CG16791	chr3R_17149949_17160248_-	0.725366	0.0659346	0.190752	1.27777	1.47209	36.0546	35.399	45.2319	36.5131	35.399	52.1105	0.23123
B52	CG16791	chr3R_17160491_17163398_-	0.223029	0.463513	0.403282	1.79357	1.82781	19.7846	18.7905	33.7022	19.8275	18.7905	34.3455	0.0999188
B52	CG16817	chr3R_5503809_5504283_+	0.00456408	19.8459	12.6588	18.4673	14.2959	7.17257	3.31375	61.1961	6.25104	3.31375	47.3732	0.0019158
B52	CG16817	chr3R_5504699_5504764_+	0.250222	0.215835	0.189986	Inf	Inf	0.0591267	0	0.8869	0.0789553	0	1.18433	0.122257
B52	CG16833	chr2L_10989875_10989973_+	0.828145	0.477001	0.0901121	40.5445	18.0472	0.238629	0.0656241	2.6607	0.140204	0.0656241	1.18433	0.252827
B52	CG16865	chr2L_13812358_13812478_+	0.250222	0.215835	0.189986	Inf	Inf	0.0591267	0	0.8869	0.0789553	0	1.18433	0.122257
B52	CG16952	chrX_15764620_15765393_+	0.786107	0.623292	0.136136	6.94612	4.63778	1.06978	0.766096	5.3214	0.951889	0.766096	3.55299	0.24404
B52	CG16952	chrX_15765557_15765891_+	0.243355	0.0986259	0.0901121	15.4499	20.6311	0.112705	0.057405	0.8869	0.132533	0.057405	1.18433	0.112477
B52	CG16972	chr2L_13202409_13202543_-	0.203226	0.710872	0.524053	Inf	Inf	0.17738	0	2.6607	0.157911	0	2.36866	0.0893929
B52	CG17019	chr2R_8819048_8819106_-	0.243187	0.0987734	0.0901121	8.93719	11.9344	0.151748	0.099237	0.8869	0.171576	0.099237	1.18433	0.112291
B52	CG1703	chrX_11506138_11506208_+	0.190533	1.42547	2.37821	Inf	Inf	0.236507	0	3.5476	0.473732	0	7.10598	0.0826121
B52	CG17078	chr2L_276498_276738_-	0.682204	0.323103	0.089166	17.8744	11.9344	0.210875	0.099237	1.7738	0.171576	0.099237	1.18433	0.222682
B52	CG1707	chr2R_3281467_3282500_-	0.173215	0.940192	1.01017	5.41772	6.33028	1.69533	1.30963	7.0952	1.77501	1.30963	8.2903	0.0743006
B52	CG17119	chr3R_18881694_18881763_-	0.72801	0.127594	0.367232	6.19688	12.4126	0.385412	0.286241	1.7738	0.504024	0.286241	3.55299	0.232087
B52	CG17119	chr3R_18882049_18883154_-	0.996565	2.13763	0.192729	2.37678	1.58693	28.5181	26.1206	62.083	27.1427	26.1206	41.4515	0.334092
B52	CG17209	chrX_15659293_15659502_+	0.853922	0.0918617	0.319957	6.85645	18.3116	0.179856	0.129353	0.8869	0.27864	0.129353	2.36866	0.259232
B52	CG17209	chrX_15660479_15661101_+	0.797736	0.45506	0.0901121	5.81766	3.88433	1.20848	0.914698	5.3214	1.09058	0.914698	3.55299	0.246276
B52	CG17233	chr3L_20228778_20229127_-	0.701823	2.04493	0.479181	6.01424	3.74787	2.95144	2.212	13.3035	2.61722	2.212	8.2903	0.226088
B52	CG17271	chr3R_16646166_16646371_-	0.480655	0.276337	0.0901121	33.7567	22.5387	0.167297	0.0525466	1.7738	0.127999	0.0525466	1.18433	0.185699
B52	CG17278	chr3R_16847307_16848392_-	0.981242	0.582592	3.43131	2.32439	5.32096	5.81352	5.34188	12.4166	6.88068	5.34188	28.4239	0.312435
B52	CG17294	chr2L_8377794_8377846_+	0.369142	0.223501	0.0901121	30.8997	20.6311	0.171831	0.057405	1.7738	0.132533	0.057405	1.18433	0.162462
B52	CG17337	chr2R_1585514_1585960_+	0.0775642	2.7043	2.12187	7.54486	6.92662	5.40289	3.76161	28.3808	5.24785	3.76161	26.0552	0.032501
B52	CG17352	chr3L_8347711_8348243_-	0.28531	0.215835	0.260567	17.2081	22.9789	0.214461	0.10308	1.7738	0.254118	0.10308	2.36866	0.139356
B52	CG1746	chr3R_27043667_27044514_-	0.254641	0.209527	0.13048	1.57801	1.59465	21.5966	20.7953	32.8153	21.6197	20.7953	33.1612	0.125674
B52	CG17544	chr2L_19392990_19393496_-	0.164164	0.0292227	0.0232266	6.14244	8.20235	0.19389	0.144389	0.8869	0.213718	0.144389	1.18433	0.0700382
B52	CG17544	chr2L_19396191_19398334_-	0.149669	2.10543	3.89957	2.94072	4.02761	13.2839	11.7621	34.5891	14.1362	11.7621	47.3732	0.0634359
B52	CG17549	chr2L_19388570_19389764_-	0.435019	0.384664	0.148308	2.22983	1.91418	6.02496	5.56841	12.4166	5.90778	5.56841	10.659	0.176239
B52	CG17593	chr2L_3515278_3515719_+	0.302294	0.239962	0.318531	5.22837	6.98175	0.65235	0.508896	2.6607	0.711836	0.508896	3.55299	0.144824
B52	CG17660	chr2L_1709333_1709616_-	0.260729	0.612143	0.338592	5.47756	4.87634	1.26148	0.97149	5.3214	1.22255	0.97149	4.73732	0.129393
B52	CG17691	chrU_1179422_1183262_+	0.111131	1.68713	1.68249	1.96299	2.02437	48.5625	45.6329	89.5769	48.7492	45.6329	92.3777	0.046329
B52	CG17691	chrU_1183510_1184082_+	0.239081	0.709923	1.02106	2.48237	2.96592	7.45917	6.78832	16.8511	7.67801	6.78832	20.1336	0.109351
B52	CG17737	chr3L_3223527_3223769_+	0.977577	0.282064	1.64454	6.81157	18.1918	0.541954	0.390615	2.6607	0.838305	0.390615	7.10598	0.309295
B52	CG17737	chr3L_3223928_3224313_+	0.499763	1.46769	0.439055	8.76163	5.84996	1.22883	0.809803	7.0952	1.07164	0.809803	4.73732	0.189187
B52	CG17746	chr3L_3237665_3237741_-	0.250222	0.215835	0.189986	Inf	Inf	0.0591267	0	0.8869	0.0789553	0	1.18433	0.122257
B52	CG17746	chr3L_3238073_3238611_-	0.276554	2.01869	0.812457	11.6302	7.76521	1.56362	0.915104	10.6428	1.32783	0.915104	7.10598	0.136278
B52	CG17746	chr3L_3238983_3239241_-	0.299266	0.215835	0.278898	3.39676	4.53589	1.21129	1.04441	3.5476	1.2906	1.04441	4.73732	0.143799
B52	CG17754	chrX_9145063_9146241_+	0.195377	1.87991	0.932285	5.77601	4.62782	3.03659	2.30323	13.3035	2.86028	2.30323	10.659	0.0853118
B52	CG17760	chr2R_8513642_8514257_+	0.016192	7.54884	7.64367	2.90292	3.03767	58.8717	52.244	151.66	59.341	52.244	158.7	0.00698966
B52	CG17765	chr2R_6368048_6368594_+	0.334788	1.47897	3.53141	6.0862	11.2531	2.53676	1.8944	11.5297	3.1893	1.8944	21.3179	0.15391
B52	CG17768+LSm-4	chr2L_10403557_10403729_-	0.141408	0.017638	0.0184698	7.96864	10.641	0.163006	0.111299	0.8869	0.182834	0.111299	1.18433	0.0594755
B52	CG17834	chr2L_8536269_8536893_+	1	0.00116924	0.189986	1.27841	1.83845	9.18619	9.0188	11.5297	9.52292	9.0188	16.5806	0.378056
B52	CG17841	chrX_10262793_10265749_+	0.132646	2.67001	1.44661	2.48655	2.182	27.4419	24.9675	62.083	26.9349	24.9675	54.4791	0.0557296
B52	CG17912	chr2L_16743571_16743759_+	0.224096	0.468742	0.462553	5.42134	6.03286	1.27089	0.981565	5.3214	1.3109	0.981565	5.92165	0.100519
B52	CG17912	chr2L_16744386_16744689_+	0.771519	0.131378	0.0223889	4.13699	3.68291	0.777652	0.643149	2.6607	0.758183	0.643149	2.36866	0.240837
B52	CG17919	chr3R_2169972_2170252_+	0.821326	0.0124087	0.0876702	2.40551	3.21221	1.61297	1.47478	3.5476	1.69229	1.47478	4.73732	0.251282
B52	CG17931	chr3R_12184511_12184856_-	0.226449	0.713782	0.443081	2.68688	2.48396	9.54738	8.58224	23.0594	9.43128	8.58224	21.3179	0.101699
B52	CG17985	chr2R_3541460_3541982_-	0.202771	1.37694	0.731233	8.36989	6.70608	1.58026	1.05963	8.869	1.46272	1.05963	7.10598	0.0890597
B52	CG1801	chrX_21180497_21181187_-	0.148936	1.27191	1.53308	36.6978	49.0047	0.408416	0.120838	4.4345	0.507559	0.120838	5.92165	0.0631284
B52	CG18081	chr3L_15827552_15827833_-	0.402187	0.245036	0.0901121	27.0297	18.0472	0.179503	0.0656241	1.7738	0.140204	0.0656241	1.18433	0.169209
B52	CG18081	chr3L_15827984_15828293_-	0.56451	1.01612	0.285932	38.8284	20.7399	0.402227	0.114208	4.4345	0.264504	0.114208	2.36866	0.201329
B52	CG1812	chrX_20385218_20385380_+	0.329869	0.419774	0.189986	Inf	Inf	0.118253	0	1.7738	0.0789553	0	1.18433	0.152685
B52	CG18135	chr3L_18987094_18988530_-	0.0834144	2.29916	2.17985	2.98682	3.07309	20.5124	18.1132	54.1009	20.6166	18.1132	55.6635	0.0349429
B52	CG18135	chr3L_18988910_18990974_-	0.904004	0.130513	0.526559	1.56848	2.21084	10.5639	10.1781	15.9642	10.9998	10.1781	22.5023	0.273995
B52	CG1814	chr2R_5468712_5468770_+	0.679909	0.215835	0.597091	Inf	Inf	0.0591267	0	0.8869	0.236866	0	3.55299	0.222258
B52	CG1815	chr3R_27497948_27499178_+	0.441184	1.03756	0.350793	4.28754	3.27166	3.53068	2.89597	12.4166	3.33455	2.89597	9.47463	0.177815
B52	CG1824	chrX_12487646_12487908_-	0.384342	0.232397	0.0901121	13.7129	9.15582	0.238982	0.129353	1.7738	0.199684	0.129353	1.18433	0.165673
B52	CG18467	chr2R_13328381_13328991_+	0.234702	0.0904357	0.0897053	8.93719	11.9344	0.151748	0.099237	0.8869	0.171576	0.099237	1.18433	0.106568
B52	CG1847	chrX_11763373_11763514_+	0.404558	0.215835	0.387467	Inf	Inf	0.0591267	0	0.8869	0.157911	0	2.36866	0.169809
B52	CG18522	chr3R_11358230_11358289_-	0.855597	0.505311	0.0901121	50.6351	22.5387	0.226424	0.0525466	2.6607	0.127999	0.0525466	1.18433	0.259745
B52	CG18522	chr3R_11358911_11358968_-	0.244811	0.096407	0.0901121	11.5468	15.4191	0.130815	0.0768094	0.8869	0.150644	0.0768094	1.18433	0.11365
B52	CG18522	chr3R_11361241_11361349_-	0.116731	1.6057	1.58723	12.5474	14.3616	0.87569	0.494789	6.2083	0.935535	0.494789	7.10598	0.0486833
B52	CG18522	chr3R_11362279_11362757_-	0.0454778	6.31338	3.58934	5.31435	4.15656	15.0422	11.6821	62.083	14.1405	11.6821	48.5575	0.0189865
B52	CG18659	chr2R_5011651_5012248_-	0.131577	1.94824	3.09796	3.002	3.87513	10.046	8.86308	26.607	10.5619	8.86308	34.3455	0.0551459
B52	CG18659	chr2R_5013572_5013685_-	0.133684	0.0114652	0.0164222	9.70889	12.9648	0.144386	0.0913493	0.8869	0.164215	0.0913493	1.18433	0.0561445
B52	CG18659	chr2R_5013719_5014531_-	0.00871786	11.424	9.39823	7.88122	7.59127	10.0136	6.86453	54.1009	9.88093	6.86453	52.1105	0.00370191
B52	CG18659	chr2R_5014668_5014923_-	0.875123	0.497224	2.00145	3.25644	6.08792	3.13322	2.72352	8.869	3.64733	2.72352	16.5806	0.265098
B52	CG18659	chr2R_5016147_5018668_-	0.979302	0.247752	1.41485	1.43756	2.07636	31.1123	30.2305	43.4581	32.3997	30.2305	62.7695	0.310794
B52	CG1868	chr2R_5469956_5470009_-	0.357554	0.215835	0.0901121	19.3687	12.9321	0.203729	0.0915807	1.7738	0.164431	0.0915807	1.18433	0.159677
B52	CG1868	chr2R_5471788_5471969_-	0.277018	0.334383	0.418364	12.5257	16.7263	0.375638	0.212419	2.6607	0.435124	0.212419	3.55299	0.136445
B52	CG18812	chr2R_3615016_3615446_-	0.405248	0.502519	0.189986	Inf	Inf	0.118253	0	1.7738	0.0789553	0	1.18433	0.17011
B52	CG18812	chr2R_3617214_3622658_-	0.270604	0.0837067	0.0901121	1.52298	1.69478	10.8476	10.4822	15.9642	10.9677	10.4822	17.7649	0.133731
B52	CG18815	chr3L_11621695_11622060_+	0.39909	1.39741	0.486738	10.8078	7.21616	1.08573	0.656487	7.0952	0.928542	0.656487	4.73732	0.168567
B52	CG18815	chr3L_11622605_11622680_+	0.156483	0.0252165	0.0229281	8.43918	11.2693	0.157214	0.105093	0.8869	0.177042	0.105093	1.18433	0.0664856
B52	CG1882	chr2R_3700498_3700582_+	0.250222	0.215835	0.189986	2.7739	3.08679	2.14525	1.91838	5.3214	2.18527	1.91838	5.92165	0.122257
B52	CG1888	chr2R_5433802_5434230_-	0.970151	0.434791	0.0518591	7.46914	3.98959	0.849762	0.59371	4.4345	0.712039	0.59371	2.36866	0.302828
B52	CG1910	chr3R_27573809_27574280_+	0.257116	0.593681	0.852972	5.58115	7.45283	1.24466	0.95346	5.3214	1.36363	0.95346	7.10598	0.127266
B52	CG1927	chr3L_1967503_1968077_-	0.623175	0.447185	0.114525	9.36225	6.25098	0.590171	0.378926	3.5476	0.511575	0.378926	2.36866	0.212651
B52	CG1951	chr3R_24853859_24854088_+	0.939099	0.631416	0.0901121	60.1355	20.0756	0.291567	0.0589934	3.5476	0.134016	0.0589934	1.18433	0.286638
B52	CG1965	chr3R_2893817_2894429_+	0.0477569	3.73721	4.68908	15.9438	21.2907	1.88776	0.945654	15.0773	2.22485	0.945654	20.1336	0.0200864
B52	CG2004	chrX_8608207_8608438_-	0.844575	0.0899979	0.301343	2.64182	4.40973	1.48984	1.34286	3.5476	1.64811	1.34286	5.92165	0.256821
B52	CG2010	chr3R_25320848_25321289_+	0.960948	0.215835	0.024807	15.239	10.1748	0.226892	0.116398	1.7738	0.187594	0.116398	1.18433	0.297253
B52	CG2010	chr3R_25321524_25322262_+	0.821286	0.215835	0.756242	13.5332	36.1434	0.240586	0.13107	1.7738	0.438153	0.13107	4.73732	0.251237
B52	CG2017	chr3R_1687027_1687468_-	0.999967	0.0280739	0.554846	1.83668	3.37235	4.07854	3.86307	7.0952	4.47404	3.86307	13.0276	0.36375
B52	CG2063	chr2R_5173854_5173919_-	0.457573	0.264039	0.0901121	20.7716	13.8687	0.197956	0.0853955	1.7738	0.158658	0.0853955	1.18433	0.181234
B52	CG2064	chr2R_3553522_3553650_+	0.0538225	3.73721	5.64087	10.3072	15.1402	2.78873	1.72093	17.738	3.34322	1.72093	26.0552	0.0224325
B52	CG2065	chr2R_3552340_3552400_+	0.948784	0.215835	0.0267958	11.3239	7.56074	0.264453	0.156642	1.7738	0.225154	0.156642	1.18433	0.291527
B52	CG2162	chr3L_3035365_3036490_+	0.234454	0.431268	0.318022	2.97253	2.97704	4.05122	3.58039	10.6428	4.05229	3.58039	10.659	0.106414
B52	CG2162	chr3L_3036902_3037783_+	0.325416	1.06798	2.22485	3.8735	5.96828	3.54677	2.97656	11.5297	3.96245	2.97656	17.7649	0.151705
B52	CG2162	chr3L_3038568_3038728_+	0.168877	0.0300643	0.0260468	8.79086	11.7389	0.15329	0.100889	0.8869	0.173118	0.100889	1.18433	0.0723453
B52	CG2162	chr3L_3039819_3039926_+	0.250222	0.215835	0.189986	Inf	Inf	0.0591267	0	0.8869	0.0789553	0	1.18433	0.122257
B52	CG2182	chr3R_1482294_1482520_-	0.0723932	2.57249	2.55547	94.6039	108.283	0.475136	0.0656241	6.2083	0.534981	0.0656241	7.10598	0.0303442
B52	CG2182	chr3R_1484430_1485198_-	0.669853	2.26895	0.545319	8.55071	4.44043	2.80682	1.867	15.9642	2.29522	1.867	8.2903	0.220846
B52	CG2186	chrX_10751969_10752320_+	0.357554	0.215835	0.0901121	7.31686	6.51375	0.516777	0.36364	2.6607	0.497308	0.36364	2.36866	0.159677
B52	CG2186	chrX_10753438_10753632_+	0.250222	0.215835	0.189986	2.57981	2.87081	2.27996	2.06271	5.3214	2.31997	2.06271	5.92165	0.122257
B52	CG2187	chr3R_27583191_27583496_-	0.245847	0.0953842	0.0901121	16.8784	22.5387	0.10817	0.0525466	0.8869	0.127999	0.0525466	1.18433	0.114703
B52	CG2225	chr2L_21668237_21668292_-	0.250222	0.215835	0.189986	Inf	Inf	0.0591267	0	0.8869	0.0789553	0	1.18433	0.122257
B52	CG2246	chr3R_26421688_26422725_-	0.859718	0.0481406	0.199763	1.37148	2.74713	2.65075	2.58669	3.5476	2.88798	2.58669	7.10598	0.261005
B52	CG2247	chrX_11503747_11504234_-	0.0843504	2.33346	2.0448	19.9613	19.5473	1.50894	0.666466	13.3035	1.49054	0.666466	13.0276	0.0353914
B52	CG2247	chrX_11504868_11505564_-	0.241863	0.350482	0.338592	4.2634	4.74431	1.51971	1.24816	5.3214	1.55972	1.24816	5.92165	0.111316
B52	CG2258	chrX_7994105_7995101_-	0.272138	0.582592	0.309804	7.09822	6.31911	1.05446	0.749681	5.3214	1.01552	0.749681	4.73732	0.134346
B52	CG2310	chr3R_25318474_25318971_-	0.58083	1.08588	0.300346	7.20592	4.81124	1.39201	0.984635	7.0952	1.23481	0.984635	4.73732	0.204652
B52	CG2469	chr3L_1310315_1310627_+	0.620469	0.195722	0.434482	6.08314	12.1847	0.390407	0.291593	1.7738	0.509019	0.291593	3.55299	0.212193
B52	CG2519	chr3R_1370791_1371392_-	0.218453	0.57661	0.63525	3.17366	3.70823	2.55962	2.23565	7.0952	2.63929	2.23565	8.2903	0.0972556
B52	CG2519	chr3R_1371465_1371914_-	0.229374	0.47322	0.509598	2.68776	2.99094	4.40526	3.95973	10.6428	4.4853	3.95973	11.8433	0.103455
B52	CG2681	chrX_2603720_2604352_+	0.636869	0.540004	0.150254	4.10834	2.74305	2.60613	2.15878	8.869	2.40964	2.15878	5.92165	0.215246
B52	CG2747	chr3R_3850792_3852498_-	0.921648	0.215835	0.0304925	2.50722	2.13057	4.2821	3.89112	9.7559	4.1844	3.89112	8.2903	0.280195
B52	CG2765	chr2R_20850114_20850504_-	0.149946	1.32499	0.9649	5.40272	5.15326	2.97277	2.29821	12.4166	2.93455	2.29821	11.8433	0.0635321
B52	CG2765	chr2R_20850772_20852094_-	0.0380318	4.27042	4.4429	3.52311	3.92051	12.3515	10.573	37.2498	12.6316	10.573	41.4515	0.0160793
B52	CG2767	chr3R_3832687_3833053_-	0.135552	1.46351	1.80995	12.0968	16.1535	0.892893	0.51322	6.2083	1.03169	0.51322	8.2903	0.0569024
B52	CG2767	chr3R_3833235_3833617_-	0.936016	0.0744664	0.322722	4.24516	8.50322	0.508237	0.41784	1.7738	0.62685	0.41784	3.55299	0.285073
B52	CG2818	chr2L_3713737_3714091_+	0.977577	0.0288818	0.203725	9.70889	25.9297	0.144386	0.0913493	0.8869	0.24317	0.0913493	2.36866	0.309247
B52	CG2852	chr2R_18533040_18533425_-	0.0382143	5.10554	3.78999	18.9267	16.483	2.36584	1.07777	20.3987	2.19025	1.07777	17.7649	0.0161845
B52	CG2865	chrX_2176551_2186357_-	0.726815	0.168867	0.465859	1.69124	2.16431	13.1658	12.5858	21.2856	13.5627	12.5858	27.2396	0.231597
B52	CG2889	chrX_10370429_10370640_+	0.435288	0.536955	0.189986	Inf	Inf	0.118253	0	1.7738	0.0789553	0	1.18433	0.176313
B52	CG2906	chr2R_3843795_3844140_+	0.534527	0.165068	0.338592	7.53855	15.1	0.337864	0.235297	1.7738	0.456477	0.235297	3.55299	0.195888
B52	CG2909	chrX_10221037_10221098_+	0.25625	0.0904357	0.0901121	4.719	6.30155	0.469079	0.375885	1.7738	0.508737	0.375885	2.36866	0.126737
B52	CG2909	chrX_10222106_10222444_+	0.281099	0.367693	0.201224	3.60707	3.44052	2.02029	1.72115	6.2083	2.00118	1.72115	5.92165	0.138036
B52	CG2924	chrX_2161327_2162970_-	0.316983	0.341426	0.504694	2.30643	2.71757	7.10641	6.53706	15.0773	7.28559	6.53706	17.7649	0.149277
B52	CG2926	chr3R_1413174_1413242_-	0.357554	0.215835	0.0901121	20.7716	13.8687	0.197956	0.0853955	1.7738	0.158658	0.0853955	1.18433	0.159677
B52	CG2930	chrX_3767210_3769798_+	0.974865	0.215835	0.0217367	11.3239	7.56074	0.264453	0.156642	1.7738	0.225154	0.156642	1.18433	0.306676
B52	CG2938	chrX_3829390_3829762_-	0.279499	0.215835	0.251034	12.3072	16.4345	0.252772	0.144127	1.7738	0.292429	0.144127	2.36866	0.137532
B52	CG2970	chr2R_19838093_19838169_+	0.262557	0.0877472	0.0901121	19.4178	25.9297	0.101756	0.0456746	0.8869	0.121585	0.0456746	1.18433	0.130363
B52	CG30008	chr2R_5777666_5777791_+	0.17804	2.99588	1.32926	49.7218	27.6652	0.909297	0.214047	10.6428	0.594554	0.214047	5.92165	0.0767093
B52	CG30015	chr2R_6731533_6735957_-	0.283401	0.14692	0.187967	2.26092	2.64174	3.402	3.13819	7.0952	3.48167	3.13819	8.2903	0.138711
B52	CG30020	chr2R_6776327_6777115_+	0.650725	0.215835	0.573362	2.34404	3.65181	2.4736	2.27019	5.3214	2.67153	2.27019	8.2903	0.217678
B52	CG30020	chr2R_6778404_6778491_+	0.25801	0.0897072	0.0901121	13.5148	18.0472	0.120376	0.0656241	0.8869	0.140204	0.0656241	1.18433	0.127811
B52	CG30020	chr2R_6778765_6778912_+	0.216017	0.961017	0.553994	4.7109	4.19382	2.8181	2.25919	10.6428	2.74022	2.25919	9.47463	0.0958497
B52	CG30082	chr2R_11572907_11573024_-	0.253738	0.0923062	0.0905796	5.03254	6.72025	0.447222	0.352466	1.7738	0.486879	0.352466	2.36866	0.125108
B52	CG30089	chr2R_11646140_11648269_+	0.194779	0.901459	1.15751	2.70116	3.18267	6.21481	5.58178	15.0773	6.39399	5.58178	17.7649	0.0848991
B52	CG30118	chr2R_14320281_14324101_-	0.945672	0.310613	1.48196	2.08354	3.52421	6.84628	6.38505	13.3035	7.45953	6.38505	22.5023	0.290109
B52	CG30118	chr2R_14324234_14325079_-	0.981394	0.130513	0.754984	4.3764	9.7401	0.744815	0.607966	2.6607	0.962211	0.607966	5.92165	0.312483
B52	CG30118	chr2R_14325118_14325444_-	0.439006	0.884444	2.07632	18.8111	40.1913	0.515656	0.235738	4.4345	0.851665	0.235738	9.47463	0.177138
B52	CG3011	chrX_5809331_5810295_-	0.0953289	4.05074	2.08827	9.58812	7.11309	3.92742	2.4975	23.9463	3.51533	2.4975	17.7649	0.0396705
B52	CG30122	chr2R_14520869_14520930_-	0.136924	1.36917	1.56042	Inf	Inf	0.236507	0	3.5476	0.315821	0	4.73732	0.0576047
B52	CG30122	chr2R_14521791_14522274_-	0.898378	4.85566	0.826745	8.67462	3.86124	5.1002	3.37395	29.2677	4.01753	3.37395	13.0276	0.27183
B52	CG30122	chr2R_14522447_14523647_-	0.000331216	45.7132	41.1666	11.7489	11.4715	36.1535	21.0612	247.445	35.764	21.0612	241.603	0.000159282
B52	CG30122	chr2R_14526123_14526323_-	0.278738	7.39866	2.11225	157.698	45.7791	1.48064	0.129353	20.3987	0.515506	0.129353	5.92165	0.137231
B52	CG30349	chr2R_4797855_4797991_+	0.664956	0.320651	0.0900095	32.1258	21.4497	0.169787	0.0552143	1.7738	0.130489	0.0552143	1.18433	0.220018
B52	CG30389	chr2R_17041672_17042048_-	0.477686	1.23172	0.387593	5.35073	3.89735	2.35212	1.82328	9.7559	2.17546	1.82328	7.10598	0.184962
B52	CG30389	chr2R_17044803_17045421_-	0.866669	0.434679	1.70094	2.37442	4.01623	6.11621	5.60283	13.3035	6.72946	5.60283	22.5023	0.262834
B52	CG30423	chr2R_20763183_20763287_-	0.99999	0.00652942	0.25243	2.41048	4.2918	1.2076	1.10381	2.6607	1.34604	1.10381	4.73732	0.367252
B52	CG30493	chr2R_3586893_3587004_+	0.268044	0.274439	0.320911	30.0678	40.1512	0.173314	0.0589934	1.7738	0.212971	0.0589934	2.36866	0.132671
B52	CG30497+CG45093	chr2R_3629426_3629512_-	0.978919	0.0308638	0.219468	3.49772	7.00606	0.591575	0.507131	1.7738	0.710188	0.507131	3.55299	0.310504
B52	CG30497+CG45093	chr2R_3629684_3632384_-	0.0191524	6.76931	6.98211	2.98216	3.1677	44.4446	39.257	117.071	44.9302	39.257	124.355	0.00807249
B52	CG3091	chrX_2147282_2147349_-	0.999355	0.227134	0.010671	8.58788	5.73395	0.31103	0.206547	1.7738	0.271732	0.206547	1.18433	0.34922
B52	CG3091	chrX_2147644_2147990_-	0.372905	0.818601	1.72187	10.626	19.8654	0.685136	0.417324	4.4345	0.942189	0.417324	8.2903	0.163182
B52	CG31064	chr3R_23062083_23062584_-	0.618333	0.248178	0.623392	3.46024	5.39077	1.79011	1.53787	5.3214	1.98803	1.53787	8.2903	0.211597
B52	CG31122	chr3R_14235594_14235801_-	0.999321	0.472447	0.0277136	5.97333	3.19062	0.988524	0.742383	4.4345	0.850801	0.742383	2.36866	0.348688
B52	CG31122	chr3R_14237354_14238483_-	0.147884	1.16329	1.16356	3.03724	3.28327	6.96503	6.13218	18.6249	7.06561	6.13218	20.1336	0.0623974
B52	CG31145	chr3R_19434204_19434440_-	0.3217	1.66751	0.638088	5.84923	4.16577	3.00968	2.2744	13.3035	2.75442	2.2744	9.47463	0.150625
B52	CG31145	chr3R_19434522_19437614_-	0.0553843	3.44723	4.6307	2.54764	2.97677	33.7959	30.635	78.0472	34.6723	30.635	91.1934	0.0230411
B52	CG31145	chr3R_19437859_19440098_-	0.261236	0.398323	0.22764	1.65626	1.62192	16.7673	16.0645	26.607	16.7305	16.0645	26.0552	0.129672
B52	CG31145	chr3R_19442045_19448092_-	0.204179	0.785072	0.537216	1.80753	1.74322	37.2302	35.3283	63.8568	37.0787	35.3283	61.5851	0.0898627
B52	CG31145	chr3R_19448372_19452318_-	0.0459321	3.82641	3.59275	3.60347	3.7426	15.5975	13.2907	47.8926	15.7208	13.2907	49.7418	0.0191838
B52	CG31145	chr3R_19453183_19457207_-	0.983154	0.00728841	0.0966572	1.35205	1.62492	13.4273	13.1194	17.738	13.6659	13.1194	21.3179	0.314409
B52	CG31145	chr3R_19457909_19458226_-	0.300262	0.715886	1.27712	10.1237	16.2225	0.704462	0.438031	4.4345	0.88256	0.438031	7.10598	0.144046
B52	CG31211	chr3R_7776734_7776971_+	0.0734385	6.02664	2.83295	17.1052	11.4208	2.15039	1.03699	17.738	1.75741	1.03699	11.8433	0.0307284
B52	CG31211	chr3R_7777215_7777444_+	0.128085	1.93409	2.99538	4.30457	6.06749	4.5257	3.70866	15.9642	4.96157	3.70866	22.5023	0.0537345
B52	CG31211	chr3R_7777548_7777903_+	0.0336592	4.76788	4.52337	6.46757	6.90922	5.61345	4.11391	26.607	5.73457	4.11391	28.4239	0.0142738
B52	CG31211	chr3R_7777961_7778362_+	0.013245	8.89399	13.6336	7.88663	11.6762	7.54794	5.17298	40.7974	8.85483	5.17298	60.4008	0.00566378
B52	CG31224	chr3R_14482908_14484247_-	0.49197	2.53281	0.734344	3.74877	2.58372	8.67809	7.33411	27.4939	8.10845	7.33411	18.9493	0.187888
B52	CG31301	chr3R_11172406_11172515_+	0.551405	0.0904419	0.189986	2.06519	2.75776	2.75969	2.57672	5.3214	2.87867	2.57672	7.10598	0.198791
B52	CG31344	chr3R_11050657_11050804_-	0.124998	0.0105988	0.0146422	8.06628	10.7714	0.161748	0.109952	0.8869	0.181577	0.109952	1.18433	0.0522025
B52	CG31431	chr3R_17697863_17698131_+	0.195106	0.943756	0.606393	2.94051	2.77174	5.79077	5.12744	15.0773	5.73308	5.12744	14.212	0.085194
B52	CG31523	chr3R_292566_293015_-	0.183152	1.24889	1.86279	4.69756	6.27293	3.05942	2.4544	11.5297	3.31719	2.4544	15.3963	0.0790474
B52	CG31523	chr3R_294356_296835_-	0.218484	0.52443	0.526619	1.57999	1.63439	41.3957	39.8547	62.9699	41.5402	39.8547	65.1381	0.0972751
B52	CG31547	chr3R_1315966_1316247_-	0.245145	0.0585552	0.0772211	5.21854	6.96862	0.435497	0.339903	1.7738	0.475154	0.339903	2.36866	0.114002
B52	CG31550	chr3R_1312607_1312772_+	0.999917	0.0803639	1.03259	4.04362	13.4992	0.527675	0.438666	1.7738	0.804198	0.438666	5.92165	0.36021
B52	CG31550	chr3R_1312900_1312992_+	0.441691	0.377407	0.766441	13.7712	24.5193	0.357707	0.193208	2.6607	0.496148	0.193208	4.73732	0.177916
B52	CG31601	chr2L_22041689_22042106_-	0.219477	0.536649	0.410473	4.49021	4.49703	1.94782	1.58015	7.0952	1.94854	1.58015	7.10598	0.0979177
B52	CG31619	chr2L_21711411_21712768_+	0.058912	3.99939	2.69116	5.33976	4.75366	7.06687	5.48109	29.2677	6.8527	5.48109	26.0552	0.0246624
B52	CG31619	chr2L_21717673_21719513_+	0.167854	1.61794	0.935346	2.22846	2.02895	28.4184	26.2672	58.5354	28.069	26.2672	53.2948	0.0717207
B52	CG31619	chr2L_21719644_21720122_+	0.357554	0.215835	0.0901121	2.04095	1.87372	7.43533	6.95283	14.1904	7.35781	6.95283	13.0276	0.159677
B52	CG31619	chr2L_21720482_21725067_+	0.486136	0.27902	0.0901121	1.60279	1.47145	36.8375	35.4143	56.7616	36.5274	35.4143	52.1105	0.186689
B52	CG31619	chr2L_21725446_21727005_+	1	0.017638	1.0563	1.47514	2.95476	8.68386	8.41723	12.4166	9.51415	8.41723	24.8709	0.378461
B52	CG31638	chr2L_6495105_6495243_+	0.87406	1.62392	0.291643	26.5099	10.1143	0.632462	0.234188	6.2083	0.376486	0.234188	2.36866	0.264577
B52	CG3164	chr2L_125267_126109_-	0.160733	1.50824	2.29656	3.08565	3.94876	7.85741	6.89825	21.2856	8.25434	6.89825	27.2396	0.0685795
B52	CG3164	chr2L_126228_128799_-	0.0146333	8.13665	7.89074	3.70483	3.82641	36.1674	30.6419	113.523	36.4157	30.6419	117.249	0.00632421
B52	CG31650	chr2L_5041540_5041688_-	0.249459	0.0930542	0.0901121	13.5148	18.0472	0.120376	0.0656241	0.8869	0.140204	0.0656241	1.18433	0.119047
B52	CG31678	chr2L_20661149_20661989_-	0.915152	0.0301294	0.189256	3.14292	6.29538	0.645008	0.56438	1.7738	0.763621	0.56438	3.55299	0.277283
B52	CG31694	chr2L_2871689_2873635_-	0.0464235	5.39971	3.35575	5.58555	4.72991	8.50036	6.51018	36.3629	8.129	6.51018	30.7926	0.019424
B52	CG31705	chr2L_11526013_11528120_-	0.999992	1.56041	0.0608465	3.25477	1.77071	8.46322	7.35729	23.9463	7.73531	7.35729	13.0276	0.367922
B52	CG31710	chr2L_9703606_9704065_-	0.989954	0.215835	1.43819	2.15108	4.46827	3.9955	3.71074	7.9821	4.56873	3.71074	16.5806	0.322336
B52	CG31743+CG34313	chr2L_16879921_16880588_+	0.442927	0.203839	0.0639329	5.80388	5.16683	0.605253	0.458435	2.6607	0.585783	0.458435	2.36866	0.178243
B52	CG31875:SoYb	chr2L_10001434_10002183_-	0.979287	0.089773	0.492626	3.44782	7.67345	0.897639	0.771706	2.6607	1.11504	0.771706	5.92165	0.310698
B52	CG31955	chr2L_3712446_3712497_-	0.666376	0.215835	0.587694	Inf	Inf	0.0591267	0	0.8869	0.157911	0	2.36866	0.220394
B52	CG31957	chr2L_3871870_3872172_-	0.248177	0.0939234	0.0901121	11.5468	15.4191	0.130815	0.0768094	0.8869	0.150644	0.0768094	1.18433	0.117694
B52	CG3209	chr2R_19957766_19958290_+	0.0144068	8.22389	8.00108	8.47224	9.22942	5.95957	3.97796	33.7022	6.16037	3.97796	36.7142	0.00621521
B52	CG3209	chr2R_19958528_19959513_+	0.00424933	13.9685	17.8222	6.92343	8.88505	13.759	9.8638	68.2913	15.0489	9.8638	87.6404	0.00182643
B52	CG3209	chr2R_19959748_19960227_+	0.135103	1.35414	1.4275	5.76707	6.51631	2.6346	1.99923	11.5297	2.73446	1.99923	13.0276	0.0567129
B52	CG32103	chr3L_12397391_12397462_-	0.250222	0.215835	0.189986	Inf	Inf	0.0591267	0	0.8869	0.0789553	0	1.18433	0.122257
B52	CG32103	chr3L_12398261_12398433_-	0.318727	0.00709	0.0282673	2.8577	3.81606	0.697581	0.620708	1.7738	0.737238	0.620708	2.36866	0.149718
B52	CG32103	chr3L_12398518_12401209_-	0.206543	1.63887	0.820123	2.15127	1.91515	22.6394	21.0257	45.2319	22.3084	21.0257	40.2672	0.0909783
B52	CG32103	chr3L_12401751_12405110_-	0.0635118	2.91521	3.19444	3.14698	3.46076	16.4304	14.3731	45.2319	16.731	14.3731	49.7418	0.0267538
B52	CG32103	chr3L_12407187_12407801_-	0.911837	0.338378	0.0497124	2.15798	1.60093	3.98443	3.69888	7.9821	3.84706	3.69888	5.92165	0.276266
B52	CG32112	chr3L_12735050_12735143_+	0.73743	0.41596	0.0901121	20.5694	9.15582	0.298109	0.129353	2.6607	0.199684	0.129353	1.18433	0.233768
B52	CG32138	chr3L_14058259_14058688_+	0.0262776	6.66824	5.00328	11.1084	10.2301	3.87569	2.31538	25.7201	3.74012	2.31538	23.6866	0.0111289
B52	CG32138	chr3L_14062028_14062185_+	0.880008	0.798056	3.3066	6.05741	16.1776	1.37047	1.02491	6.2083	2.06196	1.02491	16.5806	0.266378
B52	CG32138	chr3L_14062497_14062991_+	0.236103	4.12771	1.49021	12.7047	7.6344	2.48563	1.39618	17.738	2.0137	1.39618	10.659	0.107371
B52	CG32176	chr3L_17429532_17429612_+	0.360291	0.218154	0.0901121	30.0678	20.0756	0.173314	0.0589934	1.7738	0.134016	0.0589934	1.18433	0.16017
B52	CG3226	chrX_6547764_6547940_-	0.999988	0.0208677	0.515716	2.31749	6.18937	1.24893	1.14809	2.6607	1.54529	1.14809	7.10598	0.366832
B52	CG32344	chr3L_321364_321914_-	0.0484049	4.74699	3.15631	5.76901	4.97012	6.281	4.7658	27.4939	6.02718	4.7658	23.6866	0.0203414
B52	CG32425	chr3L_20502876_20502999_+	0.249459	0.0930542	0.0901121	15.4499	20.6311	0.112705	0.057405	0.8869	0.132533	0.057405	1.18433	0.119047
B52	CG32486	chr3L_3056923_3056992_-	0.317667	0.402656	0.189986	Inf	Inf	0.118253	0	1.7738	0.0789553	0	1.18433	0.149424
B52	CG32486	chr3L_3058125_3070161_-	0.147528	3.02605	1.46965	3.00583	2.52724	18.0639	15.9333	47.8926	17.5555	15.9333	40.2672	0.0622045
B52	CG32512	chrX_20934443_20934828_-	0.973484	0.373386	2.04187	2.74946	5.96621	2.88155	2.58058	7.0952	3.43496	2.58058	15.3963	0.305363
B52	CG32521	chrX_21077612_21078132_-	0.264941	0.700762	0.370779	5.26648	4.68842	1.29783	1.01043	5.3214	1.25889	1.01043	4.73732	0.1314
B52	CG32521	chrX_21080906_21082106_-	0.165306	1.59381	0.93794	6.11964	5.44794	2.3327	1.73912	10.6428	2.25482	1.73912	9.47463	0.0704873
B52	CG32521	chrX_21082302_21082713_-	1	1.75489	0.0429502	13.3967	3.97543	1.08824	0.595825	7.9821	0.714014	0.595825	2.36866	0.373647
B52	CG32532	chrX_19434135_19437761_-	0.192562	0.041982	0.0361623	9.70889	12.9648	0.144386	0.0913493	0.8869	0.164215	0.0913493	1.18433	0.0837163
B52	CG32579	chrX_16219154_16219644_+	0.999993	0.413476	0.010675	6.85231	3.66011	0.899644	0.647154	4.4345	0.761921	0.647154	2.36866	0.368424
B52	CG3257	chr2R_20004496_20007107_+	0.0158329	7.6648	7.73391	10.4666	11.3561	6.63426	4.06733	42.5712	6.87543	4.06733	46.1888	0.00679555
B52	CG3257	chr2R_20007130_20007418_+	0.99999	2.29916	0.0901121	30.7677	6.32092	1.1184	0.374733	11.5297	0.507662	0.374733	2.36866	0.367461
B52	CG3257	chr2R_20007778_20008234_+	0.127486	2.7043	1.48883	48.2929	32.2442	0.915208	0.22038	10.6428	0.67942	0.22038	7.10598	0.0533982
B52	CG32699	chrX_9467889_9468164_-	0.999995	0.491432	0.0125191	18.4608	8.21724	0.311899	0.144127	2.6607	0.213474	0.144127	1.18433	0.368925
B52	CG32758	chrX_5628648_5631131_-	0.250222	0.215835	0.189986	2.10763	2.25155	4.51878	4.20805	8.869	4.55916	4.20805	9.47463	0.122257
B52	CG32767	chrX_4975291_4975518_-	0.999687	0.395556	0.0182286	16.4033	7.30144	0.328771	0.162205	2.6607	0.230347	0.162205	1.18433	0.3538
B52	CG32767	chrX_4976273_4976449_-	0.202276	0.837898	0.555183	4.43956	4.14989	2.4558	1.99772	8.869	2.41722	1.99772	8.2903	0.0888047
B52	CG32809	chrX_1585391_1586329_-	0.151776	1.80645	3.03442	4.36108	6.13011	4.72978	3.86397	16.8511	5.18548	3.86397	23.6866	0.0643794
B52	CG32813	chrX_1275160_1278557_+	0.0300997	8.03968	4.71978	6.53428	5.18478	12.8208	9.36539	61.1961	11.9782	9.36539	48.5575	0.0128221
B52	CG32814	chrX_915628_920546_-	0.967831	0.215835	0.0232266	4.12658	3.30627	1.29861	1.07462	4.4345	1.23984	1.07462	3.55299	0.301265
B52	CG32815	chrX_828715_829264_+	0.880204	0.182074	0.638993	11.2827	30.1328	0.264987	0.157215	1.7738	0.462555	0.157215	4.73732	0.266472
B52	CG3308	chr3R_17098558_17099062_-	0.277439	0.180207	0.0901121	5.15538	5.16321	0.878767	0.688136	3.5476	0.879126	0.688136	3.55299	0.136645
B52	CG33090	chr2L_14341577_14342015_+	0.955328	1.38125	0.189986	Inf	Inf	0.236507	0	3.5476	0.0789553	0	1.18433	0.294463
B52	CG33111	chr3R_19627964_19629580_-	0.995632	1.04227	0.0901121	4.90549	2.72941	2.73445	2.16957	10.6428	2.41971	2.16957	5.92165	0.332145
B52	CG33129	chr2L_10966812_10967855_-	0.349077	1.73404	0.632624	2.98276	2.36032	9.08945	8.02825	23.9463	8.75631	8.02825	18.9493	0.157485
B52	CG33129	chr2L_10968167_10968437_-	0.618669	1.47575	0.385965	105.237	40.1512	0.468947	0.0589934	6.2083	0.212971	0.0589934	2.36866	0.211667
B52	CG33129	chr2L_10968584_10968691_-	0.250222	0.215835	0.189986	Inf	Inf	0.0591267	0	0.8869	0.0789553	0	1.18433	0.122257
B52	CG33156	chr2R_9437764_9438177_-	0.250222	0.215835	0.189986	Inf	Inf	0.0591267	0	0.8869	0.0789553	0	1.18433	0.122257
B52	CG33217	chr3L_23119219_23119299_+	0.264181	0.210815	0.189986	13.7125	18.3112	0.238986	0.129356	1.7738	0.278643	0.129356	2.36866	0.131037
B52	CG33288	chr3L_21421298_21422290_+	0.247575	0.136772	0.0901121	2.52877	2.70145	1.93234	1.75362	4.4345	1.95253	1.75362	4.73732	0.117029
B52	CG3402	chr3L_652277_652443_-	0.303079	0.401621	0.589967	7.18357	9.59264	1.04615	0.740773	5.3214	1.16512	0.740773	7.10598	0.14516
B52	CG34031	chr3L_23167742_23176698_+	0.0250197	5.71154	7.64546	2.15732	2.43486	143.034	132.789	286.469	145.491	132.789	323.322	0.0106559
B52	CG3409+CG45092	chr2R_2592092_2592739_-	0.854059	0.0879552	0.299042	2.72508	4.36674	1.81444	1.62729	4.4345	1.99254	1.62729	7.10598	0.259325
B52	CG34114	chr3R_6799072_6818626_+	0.22603	0.0890826	0.0720094	7.33956	9.80094	0.171909	0.120838	0.8869	0.191738	0.120838	1.18433	0.101486
B52	CG34126	chr2L_4985763_4985861_+	0.212083	0.0658035	0.0498139	6.60808	8.82416	0.184393	0.134214	0.8869	0.204222	0.134214	1.18433	0.0935533
B52	CG34126	chr2L_4988849_4989389_+	0.984399	0.271686	0.0263879	3.0865	2.28977	2.94587	2.58614	7.9821	2.8085	2.58614	5.92165	0.315898
B52	CG34133	chr3R_25695777_25696781_+	0.224673	0.561613	0.643478	3.09337	3.49526	4.24739	3.72723	11.5297	4.34725	3.72723	13.0276	0.100867
B52	CG34159	chr2L_10203033_10203383_-	0.716212	0.157516	0.427591	2.57579	4.12753	1.90247	1.72161	4.4345	2.08056	1.72161	7.10598	0.229407
B52	CG34159	chr2L_10203661_10204171_-	0.558656	0.215835	0.507485	2.81645	4.70121	1.41213	1.2596	3.5476	1.5704	1.2596	5.92165	0.200434
B52	CG34348	chrX_11234779_11237278_+	0.864802	0.407003	0.0832377	5.40246	3.60711	1.27409	0.984996	5.3214	1.1562	0.984996	3.55299	0.262317
B52	CG34356	chr3L_9951950_9954736_+	0.130207	0.0147268	0.015083	5.66196	7.56074	0.205326	0.156642	0.8869	0.225154	0.156642	1.18433	0.0545613
B52	CG34376	chr3R_18283200_18284042_+	0.137044	1.468	1.8515	5.54564	6.83577	2.7091	2.07906	11.5297	2.88791	2.07906	14.212	0.0576426
B52	CG34386	chr2R_13978171_13980056_+	0.210945	0.567971	0.479983	35.1634	35.2168	0.33067	0.100889	3.5476	0.331029	0.100889	3.55299	0.0928644
B52	CG34394	chr2L_3361444_3362415_-	0.609799	0.707319	0.189986	3.40986	2.65614	3.62262	3.12118	10.6428	3.46579	3.12118	8.2903	0.2101
B52	CG34394	chr2L_3365677_3367244_-	0.410801	0.51215	0.189986	1.58459	1.43585	32.5649	31.3434	49.6664	32.2541	31.3434	45.0045	0.17109
B52	CG34408	chrX_10115722_10115898_+	0.258827	0.496374	0.290432	23.297	20.7399	0.283974	0.114208	2.6607	0.264504	0.114208	2.36866	0.128355
B52	CG34408	chrX_10116620_10116884_+	0.273528	0.380226	0.499387	7.18632	9.59631	0.522942	0.370245	2.6607	0.582428	0.370245	3.55299	0.135062
B52	CG34408	chrX_10117489_10118346_+	0.355034	0.726721	1.46896	5.12058	7.69253	1.76626	1.38563	7.0952	2.00385	1.38563	10.659	0.158879
B52	CG34408	chrX_10118539_10118951_+	0.716954	1.32834	0.303507	12.0867	6.9172	0.893289	0.513646	6.2083	0.716268	0.513646	3.55299	0.229569
B52	CG34417	chrX_6446327_6446671_+	0.225312	0.895753	0.509911	26.4973	21.23	0.451833	0.167357	4.4345	0.393065	0.167357	3.55299	0.101177
B52	CG34417	chrX_6471422_6471976_+	0.250927	0.092958	0.0901121	15.0339	20.0756	0.114187	0.0589934	0.8869	0.134016	0.0589934	1.18433	0.122966
B52	CG34449	chrX_9249212_9250019_-	0.312926	1.49189	0.58295	2.30879	1.93345	24.6418	22.6643	52.3271	24.0747	22.6643	43.8202	0.147908
B52	CG3499	chr2R_18771815_18771870_-	0.250222	0.215835	0.189986	Inf	Inf	0.0591267	0	0.8869	0.0789553	0	1.18433	0.122257
B52	CG3499	chr2R_18772326_18772430_-	0.152954	0.0241397	0.0196039	5.60512	7.48484	0.206808	0.15823	0.8869	0.226637	0.15823	1.18433	0.0648045
B52	CG3499	chr2R_18773335_18773438_-	0.204635	0.771197	0.949579	3.24609	3.94063	3.45546	3.00543	9.7559	3.59462	3.00543	11.8433	0.0901758
B52	CG3520	chr2R_19288101_19289149_-	0.999997	2.54443	0.0901121	13.877	4.27632	1.54411	0.830852	11.5297	1.01233	0.830852	3.55299	0.369759
B52	CG3523	chr2L_3057111_3059604_+	0.782514	0.3558	1.17919	2.2246	3.30072	7.76207	7.1762	15.9642	8.27689	7.1762	23.6866	0.243344
B52	CG3529	chr3L_9442925_9443117_+	0.19619	0.723624	0.568148	21.479	21.5116	0.390661	0.165166	3.5476	0.391021	0.165166	3.55299	0.0857047
B52	CG3529	chr3L_9443169_9443331_+	0.438372	0.75636	1.7573	40.5445	90.2358	0.238629	0.0656241	2.6607	0.456026	0.0656241	5.92165	0.176938
B52	CG3530	chr2R_19279427_19280503_-	0.284906	1.50581	0.625648	16.39	10.9433	0.877051	0.432897	7.0952	0.719858	0.432897	4.73732	0.139152
B52	CG3548	chr2R_20488504_20488631_+	0.154114	0.023939	0.0214995	7.76568	10.37	0.16572	0.114208	0.8869	0.185549	0.114208	1.18433	0.0653647
B52	CG3558	chr2L_2993410_2993544_+	0.323481	0.117454	0.180314	4.17354	5.57317	0.772396	0.637517	2.6607	0.831882	0.637517	3.55299	0.151257
B52	CG3558	chr2L_2997060_2997491_+	0.720154	0.401621	1.24132	2.44431	3.69923	5.9667	5.44265	13.3035	6.42204	5.44265	20.1336	0.230175
B52	CG3558	chr2L_2997531_2997790_+	0.989406	0.0967632	0.635828	3.92842	10.4917	0.539681	0.45153	1.7738	0.737249	0.45153	4.73732	0.321672
B52	CG3630	chrX_2056312_2060841_+	0.160376	1.02652	0.946975	2.11043	2.18408	18.0543	16.8099	35.476	18.1368	16.8099	36.7142	0.0684051
B52	CG3630	chrX_2061201_2062101_+	0.265901	0.483885	0.27226	3.38001	3.15946	3.04029	2.62396	8.869	3.00172	2.62396	8.2903	0.131779
B52	CG3630	chrX_2062267_2064821_+	0.409996	0.441207	0.189005	3.09354	2.58187	2.61366	2.29355	7.0952	2.53542	2.29355	5.92165	0.170925
B52	CG3632	chrX_16195951_16196242_+	0.236362	0.0840692	0.0883804	8.93719	11.9344	0.151748	0.099237	0.8869	0.171576	0.099237	1.18433	0.107428
B52	CG3638	chrX_1115629_1116517_-	0.208113	0.597181	0.492626	3.6189	3.75863	2.59077	2.20567	7.9821	2.61132	2.20567	8.2903	0.0916646
B52	CG3638	chrX_1120927_1127835_-	0.72129	0.0103947	0.063371	1.16512	1.32247	30.7836	30.4484	35.476	31.103	30.4484	40.2672	0.230418
B52	CG3645	chr2L_254751_259948_-	0.999552	0.965914	0.0608465	3.46746	2.01317	6.85062	5.8829	20.3987	6.28026	5.8829	11.8433	0.35143
B52	CG3651	chr2L_22124217_22124284_+	0.181526	0.034617	0.0277136	5.84319	7.80275	0.200791	0.151784	0.8869	0.22062	0.151784	1.18433	0.0783195
B52	CG3680	chr3L_20805568_20805623_+	0.455423	0.263107	0.0901121	17.1758	11.4679	0.214642	0.103273	1.7738	0.175344	0.103273	1.18433	0.180896
B52	CG3689	chr3L_9405083_9405254_+	0.299707	0.268179	0.367035	6.4681	8.63723	0.561314	0.411357	2.6607	0.6208	0.411357	3.55299	0.143957
B52	CG3703	chrX_838130_838428_-	0.999979	0.446096	0.0133567	13.9437	6.2066	0.355477	0.190818	2.6607	0.257052	0.190818	1.18433	0.365062
B52	CG3714	chr2L_4190825_4192632_-	0.637556	4.55475	1.06358	6.77529	3.76976	4.35125	3.14165	21.2856	3.72176	3.14165	11.8433	0.215354
B52	CG3714	chr2L_4192969_4193309_-	0.895393	0.352454	0.0581186	2.91055	1.94331	2.06119	1.82831	5.3214	1.94329	1.82831	3.55299	0.270726
B52	CG3714	chr2L_4195905_4196474_-	0.477884	0.407413	0.887304	8.93604	14.916	0.607039	0.396999	3.5476	0.765309	0.396999	5.92165	0.185017
B52	CG3719	chrX_1273406_1274170_-	0.283511	1.211	0.535816	3.10753	2.62085	6.18456	5.42266	16.8511	6.00861	5.42266	14.212	0.138745
B52	CG3731	chr3R_10716149_10716417_+	0.365677	0.543861	1.02495	6.39139	10.4314	1.69777	1.24888	7.9821	2.03413	1.24888	13.0276	0.161434
B52	CG3732	chr2R_18527359_18527435_-	0.250222	0.215835	0.189986	Inf	Inf	0.0591267	0	0.8869	0.0789553	0	1.18433	0.122257
B52	CG3744	chr3R_20699685_20699824_-	0.250222	0.215835	0.189986	Inf	Inf	0.0591267	0	0.8869	0.0789553	0	1.18433	0.122257
B52	CG3760	chr2R_20826197_20826282_+	0.250222	0.215835	0.189986	Inf	Inf	0.0591267	0	0.8869	0.0789553	0	1.18433	0.122257
B52	CG3760	chr2R_20826366_20826478_+	0.227206	0.639499	0.413376	58.2533	51.8594	0.22001	0.0456746	2.6607	0.20054	0.0456746	2.36866	0.102337
B52	CG3764	chr3L_16993113_16994615_-	0.255424	0.0904357	0.04117	2.37644	2.53872	2.03725	1.86602	4.4345	2.05744	1.86602	4.73732	0.126139
B52	CG3815	chrX_6189587_6189742_+	0.250222	0.215835	0.189986	Inf	Inf	0.0591267	0	0.8869	0.0789553	0	1.18433	0.122257
B52	CG3823	chrX_6198257_6198749_+	0.219592	0.079938	0.0599879	6.53079	8.72095	0.185876	0.135803	0.8869	0.205705	0.135803	1.18433	0.0979761
B52	CG3860	chr2R_19881421_19881772_-	0.250222	0.215835	0.189986	Inf	Inf	0.0591267	0	0.8869	0.0789553	0	1.18433	0.122257
B52	CG3907	chr2R_19909065_19909312_-	0.999999	0.81432	0.0184908	42.1959	11.2693	0.39372	0.105093	4.4345	0.177042	0.105093	1.18433	0.371668
B52	CG3967	chr3L_9410915_9411443_-	0.638488	1.47992	0.37843	24.6118	12.3246	0.742079	0.288285	7.0952	0.505932	0.288285	3.55299	0.215606
B52	CG40155	chr3RHet_1562_92065_-	0.0439194	5.19859	3.45971	6.352	5.38293	9.85107	7.26052	46.1188	9.38201	7.26052	39.0829	0.018414
B52	CG40378	chrU_156337_219232_+	0.275015	1.30387	2.59942	1.49461	1.73168	208.408	201.756	301.546	211.597	201.756	349.377	0.135694
B52	CG4038	chr2R_16984213_16984546_-	0.264064	0.328815	0.385473	13.7129	18.3116	0.238982	0.129353	1.7738	0.27864	0.129353	2.36866	0.130988
B52	CG4045	chrX_1969173_1969239_-	0.250222	0.215835	0.189986	Inf	Inf	0.0591267	0	0.8869	0.0789553	0	1.18433	0.122257
B52	CG4049	chr2R_20000795_20001527_-	0.999897	1.73827	0.0901121	6.72688	2.80712	2.9149	2.10951	14.1904	2.36365	2.10951	5.92165	0.358878
B52	CG4065	chr2R_20024859_20024921_-	0.250222	0.215835	0.189986	Inf	Inf	0.0591267	0	0.8869	0.0789553	0	1.18433	0.122257
B52	CG4080	chr3L_9382219_9383101_-	0.372597	0.337769	0.57149	3.48067	4.64794	2.07863	1.78365	6.2083	2.21743	1.78365	8.2903	0.163097
B52	CG4080	chr3L_9383899_9391606_-	0.260638	0.27237	0.299424	2.20246	2.4509	5.2196	4.83222	10.6428	5.29963	4.83222	11.8433	0.129294
B52	CG4091	chr2R_19588393_19589633_-	0.108969	2.23652	1.52572	6.00458	5.51255	3.15174	2.36326	14.1904	3.07422	2.36326	13.0276	0.0452604
B52	CG4169	chr3L_16577823_16577878_+	0.250222	0.215835	0.189986	Inf	Inf	0.0591267	0	0.8869	0.0789553	0	1.18433	0.122257
B52	CG4199	chrX_1962457_1962624_-	0.520453	0.215835	0.479914	4.54518	8.09259	0.723743	0.585389	2.6607	0.862184	0.585389	4.73732	0.193274
B52	CG4199	chrX_1963722_1964499_-	0.487257	1.24299	3.39349	3.73801	6.37813	5.05034	4.27078	15.9642	5.80203	4.27078	27.2396	0.186938
B52	CG4199	chrX_1964608_1965392_-	0.0466691	3.89281	3.41598	6.77758	6.86589	5.25656	3.79488	25.7201	5.27891	3.79488	26.0552	0.0195935
B52	CG4199	chrX_1966223_1966445_-	0.0163404	10.7545	6.88757	25.8696	18.9176	3.82723	1.43991	37.2498	3.15988	1.43991	27.2396	0.00705113
B52	CG4210	chr3R_11039830_11039891_+	0.250222	0.215835	0.189986	Inf	Inf	0.0591267	0	0.8869	0.0789553	0	1.18433	0.122257
B52	CG4221	chr3R_11753300_11755631_+	0.999257	0.0147304	0.22764	1.87195	3.74958	2.0053	1.89514	3.5476	2.24253	1.89514	7.10598	0.347799
B52	CG42231:chif	chr2L_16350284_16351926_-	0.774537	0.255857	0.811556	2.13287	3.02615	7.15568	6.6532	14.1904	7.55189	6.6532	20.1336	0.241353
B52	CG42232	chr3R_12294398_12294554_-	0.865709	0.0643934	0.231374	2.78525	4.95907	1.06898	0.955282	2.6607	1.20742	0.955282	4.73732	0.262552
B52	CG42238	chr2L_20967747_20968635_-	0.979722	0.60062	0.0778163	4.93566	2.92927	2.04156	1.61723	7.9821	1.82524	1.61723	4.73732	0.311084
B52	CG42238	chr2L_20968968_20969164_-	0.340025	0.431268	0.189986	10.4921	8.40644	0.690108	0.422651	4.4345	0.63134	0.422651	3.55299	0.155015
B52	CG42238	chr2L_21051423_21051773_-	0.452635	0.223501	0.089166	2.36035	2.10128	4.91791	4.50899	10.6428	4.84003	4.50899	9.47463	0.180432
B52	CG42269	chr3L_6062993_6063320_+	0.27112	0.110787	0.119719	5.63257	7.5215	0.412177	0.314918	1.7738	0.451834	0.314918	2.36866	0.133914
B52	CG42271	chrX_14125275_14125683_-	0.290571	0.267235	0.159807	7.01417	5.61986	0.885706	0.632221	4.4345	0.826938	0.632221	3.55299	0.140947
B52	CG42324	chr3L_3505317_3506074_+	0.239856	0.0772787	0.0871075	15.0339	20.0756	0.114187	0.0589934	0.8869	0.134016	0.0589934	1.18433	0.109674
B52	CG42327	chr3R_7496704_7497125_+	0.175245	0.0318975	0.025894	5.84319	7.80275	0.200791	0.151784	0.8869	0.22062	0.151784	1.18433	0.0754566
B52	CG42331	chr3R_20597998_20599668_+	0.910286	0.330224	1.38911	3.75202	8.01646	1.39874	1.1819	4.4345	1.73475	1.1819	9.47463	0.275636
B52	CG42336	chr2R_7183721_7184766_-	0.908227	0.798876	0.133883	3.61237	2.19264	3.17104	2.70069	9.7559	2.91542	2.70069	5.92165	0.275153
B52	CG42360	chr2R_20495045_20495195_+	0.904843	0.226909	0.94373	12.2406	32.6911	0.253504	0.144912	1.7738	0.451072	0.144912	4.73732	0.274236
B52	CG42390	chr3R_17946694_17949666_+	0.962867	1.42305	0.189986	13.323	6.67159	0.970064	0.532555	7.0952	0.733917	0.532555	3.55299	0.298281
B52	CG42390	chr3R_17952189_17954968_+	0.421984	0.352713	0.133939	6.1204	4.90376	0.971874	0.724544	4.4345	0.913107	0.724544	3.55299	0.173476
B52	CG42390	chr3R_17957065_17957822_+	0.107636	4.9307	2.22019	76.6111	43.8443	0.979042	0.162073	12.4166	0.625	0.162073	7.10598	0.044809
B52	CG42390	chr3R_17957967_17958376_+	0.246795	0.0950914	0.0901121	16.8784	22.5387	0.10817	0.0525466	0.8869	0.127999	0.0525466	1.18433	0.116235
B52	CG42399	chr2L_145911_147348_-	0.386169	0.23408	0.0901121	5.1923	4.62238	0.65565	0.512432	2.6607	0.636181	0.512432	2.36866	0.165937
B52	CG42455+vnc:vnc	chr3L_9965498_9965855_+	0.934912	0.124067	0.55311	2.40195	4.00933	3.23002	2.95393	7.0952	3.54656	2.95393	11.8433	0.284339
B52	CG42524	chr2R_11525441_11537525_+	0.238932	0.0734163	0.036152	1.69637	1.81221	5.47095	5.22823	8.869	5.51133	5.22823	9.47463	0.109199
B52	CG42542	chr3R_11026948_11027745_+	0.894027	0.0274526	0.149268	1.62038	2.16379	4.55982	4.37872	7.0952	4.71844	4.37872	9.47463	0.270246
B52	CG42553	chr3L_834719_834778_+	0.350481	0.443269	0.189986	Inf	Inf	0.118253	0	1.7738	0.0789553	0	1.18433	0.157665
B52	CG42593	chrX_7831645_7833720_+	0.997244	0.798735	0.0683435	6.868	3.43921	1.43722	1.03308	7.0952	1.20108	1.03308	3.55299	0.336121
B52	CG42613:CG43732+CG42613	chr3R_14785647_14794173_+	0.361023	0.0963486	0.1664	1.25931	1.40136	30.0909	29.5795	37.2498	30.371	29.5795	41.4515	0.160355
B52	CG42613	chr3R_14755287_14756865_+	0.259828	0.296782	0.189986	1.31553	1.30126	111.514	109.217	143.678	111.41	109.217	142.12	0.128866
B52	CG42637+Gyc76C	chr3L_19783355_19783983_-	0.160477	1.16159	1.45459	2.66609	3.05159	10.349	9.31446	24.8332	10.5884	9.31446	28.4239	0.0684632
B52	CG42663	chr2R_8635253_8636417_+	0.572495	0.496714	1.30609	8.23532	15.3959	0.798209	0.538473	4.4345	1.05526	0.538473	8.2903	0.202914
B52	CG42668	chr3R_16146597_16146924_+	0.501665	0.229011	0.0832377	5.56446	4.45833	1.03944	0.796932	4.4345	0.980669	0.796932	3.55299	0.189587
B52	CG4266	chr2R_17052549_17053063_-	0.072356	2.68267	3.33955	17.9633	23.9874	1.2625	0.592476	10.6428	1.50044	0.592476	14.212	0.0303124
B52	CG4266	chr2R_17053380_17054234_-	0.0703082	2.68982	2.49505	7.16172	7.5501	3.31948	2.35294	16.8511	3.38041	2.35294	17.7649	0.0296462
B52	CG4266	chr2R_17054548_17054676_-	0.703887	0.818949	0.189986	Inf	Inf	0.17738	0	2.6607	0.0789553	0	1.18433	0.226406
B52	CG4266	chr2R_17055689_17055936_-	0.395227	0.476759	0.936884	11.6393	19.4284	0.520981	0.304794	3.5476	0.679251	0.304794	5.92165	0.167794
B52	CG42671	chr3L_11209088_11209685_+	0.284379	0.10966	0.052012	3.96986	3.97589	1.07057	0.893634	3.5476	1.07092	0.893634	3.55299	0.139016
B52	CG42671	chr3L_11217325_11218092_+	0.250222	0.215835	0.189986	Inf	Inf	0.0591267	0	0.8869	0.0789553	0	1.18433	0.122257
B52	CG42671	chr3L_11219902_11220772_+	0.305561	0.0795443	0.0280398	2.2216	2.3733	2.15865	1.99609	4.4345	2.17883	1.99609	4.73732	0.145871
B52	CG42671	chr3L_11221647_11222212_+	0.999553	2.86251	0.196717	9.4156	3.35285	2.20563	1.41292	13.3035	1.63455	1.41292	4.73732	0.351518
B52	CG42672	chr2R_17186001_17186723_+	0.985067	0.916619	0.100408	2.92739	1.95456	6.8379	6.05932	17.738	6.44492	6.05932	11.8433	0.316616
B52	CG42674	chr3L_20148760_20148832_-	0.250222	0.215835	0.189986	Inf	Inf	0.0591267	0	0.8869	0.0789553	0	1.18433	0.122257
B52	CG42678	chr2R_18815673_18816256_+	0.228501	0.823146	1.19895	4.72254	6.30628	2.57849	2.06582	9.7559	2.7966	2.06582	13.0276	0.102992
B52	CG42678	chr2R_18818804_18819037_+	0.555269	0.0552357	0.144919	3.71974	6.62292	0.844985	0.715291	2.6607	0.983426	0.715291	4.73732	0.19961
B52	CG42708	chr2R_8560845_8561403_-	0.0661265	2.92398	2.54229	10.8804	11.1763	1.75768	1.05968	11.5297	1.77859	1.05968	11.8433	0.0278602
B52	CG42708	chr2R_8561434_8561710_-	0.435025	1.72706	0.558751	7.63922	4.63686	1.84234	1.27708	9.7559	1.58672	1.27708	5.92165	0.176263
B52	CG42708	chr2R_8562029_8562495_-	0.0913365	4.67436	2.30234	11.1251	7.72513	3.33831	1.99301	22.1725	2.88656	1.99301	15.3963	0.03815
B52	CG42708	chr2R_8562924_8563629_-	0.028015	5.21187	5.60021	8.71486	10.0648	5.7021	3.76544	32.8153	6.04098	3.76544	37.8985	0.0119766
B52	CG42732	chr2R_6252693_6263742_-	0.832016	0.0486414	0.189986	7.72494	20.6311	0.166283	0.11481	0.8869	0.265067	0.11481	2.36866	0.253694
B52	CG4294	chr2R_18488653_18488717_-	0.250222	0.215835	0.189986	Inf	Inf	0.0591267	0	0.8869	0.0789553	0	1.18433	0.122257
B52	CG4294	chr2R_18488876_18489034_-	0.986833	0.442928	2.73746	5.61239	18.7364	0.826468	0.632101	3.5476	1.37951	0.632101	11.8433	0.318529
B52	CG4294	chr2R_18489321_18489452_-	0.70217	0.881596	2.82852	13.4611	32.3558	0.603101	0.32943	4.4345	1.01807	0.32943	10.659	0.226128
B52	CG4297	chr2L_472201_473012_-	0.280644	0.215835	0.122644	2.85877	2.86311	1.39473	1.24095	3.5476	1.39509	1.24095	3.55299	0.137935
B52	CG4300	chr3L_12266721_12267102_-	0.952696	0.215835	1.06523	Inf	Inf	0.0591267	0	0.8869	0.236866	0	3.55299	0.293288
B52	CG43078	chr3L_8572237_8572573_+	0.252154	0.0925005	0.0901121	13.5148	18.0472	0.120376	0.0656241	0.8869	0.140204	0.0656241	1.18433	0.12399
B52	CG43143	chr3R_6121784_6122455_+	0.756556	0.351725	0.0871075	13.7129	9.15582	0.238982	0.129353	1.7738	0.199684	0.129353	1.18433	0.237986
B52	CG43143	chr3R_6124781_6125355_+	0.999997	2.11748	0.0869901	69.2806	15.4191	0.426449	0.0768094	5.3214	0.150644	0.0768094	1.18433	0.369634
B52	CG43338	chr2L_18670044_18671031_-	0.296967	0.21522	0.224546	5.01657	6.69891	0.672404	0.530383	2.6607	0.73189	0.530383	3.55299	0.14308
B52	CG43340	chr2R_3528123_3528336_+	0.351342	0.444198	0.189986	Inf	Inf	0.118253	0	1.7738	0.0789553	0	1.18433	0.157826
B52	CG4360	chr3R_16151951_16152037_-	0.86439	0.517374	0.0901121	6.2932	4.20184	1.14397	0.845579	5.3214	1.02607	0.845579	3.55299	0.26213
B52	CG4360	chr3R_16152521_16152594_-	0.357554	0.215835	0.0901121	4.67967	4.16602	0.708042	0.568566	2.6607	0.688572	0.568566	2.36866	0.159677
B52	CG4365	chr3L_20792089_20792242_+	0.907031	0.229011	0.957634	6.84909	15.2433	0.539957	0.388475	2.6607	0.757353	0.388475	5.92165	0.274767
B52	CG43676	chrU_250970_282506_+	0.0133508	9.17553	7.73401	5.63532	5.43989	17.0994	13.0627	73.6127	16.9292	13.0627	71.0598	0.00573265
B52	CG43689	chrX_3979053_3979650_+	0.0501983	4.00279	3.06257	6.97718	6.59956	4.2664	3.05075	21.2856	4.1896	3.05075	20.1336	0.0211548
B52	CG43689	chrX_3981417_3982046_+	0.0172176	7.96933	6.78662	3.49414	3.4469	32.8593	28.1746	98.4459	32.7706	28.1746	97.115	0.00741399
B52	CG43689	chrX_3982382_3983862_+	0.0118592	8.77497	10.1064	3.0776	3.3905	65.6189	57.6359	177.38	66.8211	57.6359	195.414	0.00503613
B52	CG43732+CG42613	chr3R_14796571_14797011_+	0.436467	1.01005	0.343069	5.72414	4.24654	1.83364	1.39446	7.9821	1.69628	1.39446	5.92165	0.176463
B52	CG43739+sky	chr2L_20877678_20881986_-	0.341861	0.659444	0.278834	5.05854	4.05297	2.22766	1.75327	8.869	2.11012	1.75327	7.10598	0.155564
B52	CG43778	chr2L_13310265_13330798_-	0.471558	0.669766	1.61402	3.75646	5.92826	3.07435	2.5971	9.7559	3.45038	2.5971	15.3963	0.183881
B52	CG43783+orb2	chr3L_8942860_8945918_-	0.562827	0.215835	0.51062	2.04055	2.57349	8.36618	7.82347	15.9642	8.64414	7.82347	20.1336	0.201072
B52	CG43867	chrX_705723_712438_-	0.84918	0.36033	0.0711857	7.3519	4.90871	0.686879	0.482542	3.5476	0.608283	0.482542	2.36866	0.257978
B52	CG43921	chrX_12416760_12417550_-	0.259284	0.0890952	0.0901121	15.0339	20.0756	0.114187	0.0589934	0.8869	0.134016	0.0589934	1.18433	0.128635
B52	CG44250	chr2R_8838855_8839350_-	0.999972	0.0704317	1.08825	3.54379	14.1967	0.585421	0.500537	1.7738	0.9409	0.500537	7.10598	0.364174
B52	CG44252	chr2R_18946317_18946577_+	0.967559	0.215835	0.0232314	13.5332	9.03584	0.240586	0.13107	1.7738	0.201287	0.13107	1.18433	0.300874
B52	CG44286+CG8788	chr2R_5027804_5028200_+	0.751474	0.133582	0.398698	5.08842	10.1923	0.443609	0.348596	1.7738	0.562222	0.348596	3.55299	0.236976
B52	CG44296	chr2R_5938066_5938126_+	0.250222	0.215835	0.189986	Inf	Inf	0.0591267	0	0.8869	0.0789553	0	1.18433	0.122257
B52	CG4452	chr3L_9360712_9361048_+	0.26099	0.561613	0.317676	18.6803	16.6299	0.310318	0.142434	2.6607	0.290849	0.142434	2.36866	0.129492
B52	CG4452	chr3L_9361315_9361667_+	1	0.00857235	1.04438	3.14773	12.61	0.644203	0.563518	1.7738	0.999682	0.563518	7.10598	0.381402
B52	CG4452	chr3L_9362415_9362645_+	0.527242	0.3558	0.820123	23.0935	46.2572	0.189942	0.0768094	1.7738	0.308555	0.0768094	3.55299	0.194437
B52	CG44774	chrX_4825228_4825983_-	0.00127264	24.0849	27.0445	8.7642	9.8119	76.0201	50.0919	439.016	79.5189	50.0919	491.497	0.000564366
B52	CG44774	chrX_4826716_4829423_-	0.00277041	17.1646	19.777	11.0593	12.5368	104.635	62.6324	692.669	110.804	62.6324	785.21	0.00122319
B52	CG44774	chrX_4830183_4832007_-	0.0298566	5.97054	9.97514	4.59949	6.60551	25.3443	20.4395	94.0114	28.0778	20.4395	135.014	0.0126622
B52	CG4495	chr2L_7183323_7183502_+	0.340228	0.43165	0.189986	Inf	Inf	0.118253	0	1.7738	0.0789553	0	1.18433	0.155093
B52	CG4496	chr2L_7187642_7187946_-	0.247167	0.0946823	0.0901121	8.93719	11.9344	0.151748	0.099237	0.8869	0.171576	0.099237	1.18433	0.116597
B52	CG45050:CG45050+CG43675	chr3R_5183404_5183705_+	0.128428	1.60676	2.05938	11.4651	15.31	1.18193	0.696208	7.9821	1.36039	0.696208	10.659	0.0538654
B52	CG45050	chr3R_5180806_5181034_+	0.306406	0.156052	0.189986	4.14521	5.53533	0.776463	0.641874	2.6607	0.835948	0.641874	3.55299	0.146068
B52	CG45086+Galphaq:Galphaq	chr2R_8505817_8505947_+	0.290208	0.128799	0.171546	7.2827	9.72501	0.345579	0.243564	1.7738	0.385237	0.243564	2.36866	0.14086
B52	CG45086+Galphaq	chr2R_8500390_8501071_+	0.942379	0.478339	0.0771535	2.10725	1.60796	6.32728	5.89233	12.4166	6.13115	5.89233	9.47463	0.288203
B52	CG45086+Galphaq	chr2R_8503920_8504044_+	0.304016	0.381428	0.189986	Inf	Inf	0.118253	0	1.7738	0.0789553	0	1.18433	0.145391
B52	CG45086+Galphaq	chr2R_8504447_8504576_+	0.476218	0.274615	0.0901121	23.0935	15.4191	0.189942	0.0768094	1.7738	0.150644	0.0768094	1.18433	0.184718
B52	CG45088+CG6191	chr2R_9479384_9480398_-	0.355728	0.0885753	0.133576	2.87169	3.83473	1.04214	0.926529	2.6607	1.10163	0.926529	3.55299	0.15894
B52	CG4511	chr3R_6680319_6680466_+	0.191621	1.21448	1.87683	7.67865	11.2791	1.66929	1.15502	8.869	1.94653	1.15502	13.0276	0.0831449
B52	CG4511	chr3R_6680755_6681015_+	0.142004	1.61872	1.08415	25.7089	21.4567	0.730596	0.275982	7.0952	0.652359	0.275982	5.92165	0.0597818
B52	CG45186	chr3L_2439831_2442435_+	0.13642	1.46044	1.81966	2.386	2.69599	15.8362	14.4967	34.5891	16.1358	14.4967	39.0829	0.0572631
B52	CG45186	chr3L_2442961_2443389_+	0.995286	1.4075	0.132508	7.52435	3.76789	1.35311	0.942965	7.0952	1.11697	0.942965	3.55299	0.331634
B52	CG45186	chr3L_2461269_2462860_+	0.307009	0.412687	0.201224	3.0152	2.81846	3.3366	2.94143	8.869	3.29802	2.94143	8.2903	0.146193
B52	CG45186	chr3L_2478449_2483258_+	0.356582	0.0940746	0.0332542	1.3673	1.38763	16.6134	16.2163	22.1725	16.6353	16.2163	22.5023	0.159145
B52	CG45186	chr3L_2483377_2484563_+	0.310352	0.215835	0.11264	4.955	4.96253	0.904739	0.715963	3.5476	0.905098	0.715963	3.55299	0.147146
B52	CG45186	chr3L_2494766_2495010_+	0.248061	0.0939719	0.0901121	13.5148	18.0472	0.120376	0.0656241	0.8869	0.140204	0.0656241	1.18433	0.117461
B52	CG4538	chr3R_15727533_15728562_-	0.0674087	4.83977	2.66207	14.6439	10.7552	2.31307	1.21129	17.738	1.99905	1.21129	13.0276	0.0284026
B52	CG4630	chr2R_9103765_9103852_-	0.250222	0.215835	0.189986	Inf	Inf	0.0591267	0	0.8869	0.0789553	0	1.18433	0.122257
B52	CG4662	chr3R_15677142_15677553_+	0.697923	0.0269467	0.0978213	1.83581	2.45147	3.06018	2.89866	5.3214	3.17915	2.89866	7.10598	0.225337
B52	CG4733	chr3R_15716977_15718238_+	0.148149	1.25168	0.992787	67.5134	67.616	0.28555	0.0525466	3.5476	0.285909	0.0525466	3.55299	0.0625517
B52	CG4747	chr2L_10005044_10005423_+	0.425611	0.215835	0.403449	3.31086	4.42118	1.85487	1.60726	5.3214	1.97384	1.60726	7.10598	0.174323
B52	CG4769	chr3L_5353512_5353791_+	0.156278	1.14319	0.907823	3.95007	3.88667	5.10503	4.26602	16.8511	5.08699	4.26602	16.5806	0.0663693
B52	CG4769	chr3L_5353840_5353976_+	0.862239	1.31665	0.226574	10.7719	4.79478	1.63167	0.988016	10.6428	1.23797	0.988016	4.73732	0.26152
B52	CG4769	chr3L_5354126_5354592_+	0.222384	0.763882	1.04854	8.87155	11.8467	1.06703	0.699799	6.2083	1.20583	0.699799	8.2903	0.0995893
B52	CG4822	chr2L_119555_119827_-	0.220909	0.0805288	0.0628213	2.0895	2.32519	2.73172	2.54674	5.3214	2.77173	2.54674	5.92165	0.0985986
B52	CG4829	chrX_16717240_16717547_+	0.812596	0.325417	0.0656287	8.16652	5.45262	0.641954	0.434408	3.5476	0.563358	0.434408	2.36866	0.249478
B52	CG4848	chr3R_8041676_8042354_-	0.834022	1.52009	0.293266	11.3066	6.03934	1.32338	0.78441	8.869	1.04794	0.78441	4.73732	0.254334
B52	CG4848	chr3R_8042409_8042602_-	0.397169	0.492695	0.189986	Inf	Inf	0.118253	0	1.7738	0.0789553	0	1.18433	0.16818
B52	CG4858	chr3L_20520381_20520692_+	0.0443754	5.66922	3.50548	14.6612	11.3678	3.58319	1.87528	27.4939	3.17146	1.87528	21.3179	0.0185946
B52	CG4860	chr3R_8047078_8047138_-	0.237007	0.558884	0.698257	15.9207	21.2599	0.44448	0.222829	3.5476	0.523795	0.222829	4.73732	0.107944
B52	CG4887	chr2L_1174267_1174496_+	0.00298427	17.798	16.6665	40.0283	41.3498	4.22974	1.17431	47.0057	4.33319	1.17431	48.5575	0.00130579
B52	CG4887	chr2L_1174571_1174909_+	0.000379482	41.8157	38.5122	42.1382	42.0915	10.0039	2.67302	112.636	9.99557	2.67302	112.511	0.000185024
B52	CG4887	chr2L_1175174_1175286_+	0.0266789	5.39179	5.97788	7.85291	9.21537	5.4297	3.72699	29.2677	5.76822	3.72699	34.3455	0.0112966
B52	CG4896	chr2L_1178468_1178840_+	0.261514	0.437965	0.254927	16.7881	14.9454	0.325302	0.158488	2.6607	0.305832	0.158488	2.36866	0.129853
B52	CG4951	chr3R_23779064_23779219_-	0.998077	1.0006	0.089166	60.1355	20.0756	0.291567	0.0589934	3.5476	0.134016	0.0589934	1.18433	0.339737
B52	CG4984	chr2R_13616818_13618608_+	0.210865	0.0607625	0.0498139	1.5315	1.67326	6.59588	6.37017	9.7559	6.65609	6.37017	10.659	0.0927856
B52	CG5001	chr2L_1186453_1191402_+	0.148589	1.19087	1.01172	2.96405	3.00813	8.45995	7.48048	22.1725	8.48193	7.48048	22.5023	0.062898
B52	CG5004	chrX_17021935_17022031_+	0.879738	0.535624	0.0901121	40.5445	18.0472	0.238629	0.0656241	2.6607	0.140204	0.0656241	1.18433	0.26633
B52	CG5004	chrX_17025193_17027643_+	0.579403	0.165068	0.366205	1.4928	1.77193	22.091	21.3883	31.9284	22.489	21.3883	37.8985	0.204289
B52	CG5009	chr2R_13648895_13649633_+	0.192449	0.769028	0.590529	18.1947	18.2223	0.418488	0.19498	3.5476	0.418847	0.19498	3.55299	0.0836966
B52	CG5010	chrX_17043510_17043866_+	0.0323829	4.74096	5.28794	9.22582	10.8983	3.87011	2.49944	23.0594	4.14878	2.49944	27.2396	0.0137044
B52	CG5028	chr3R_21509106_21509194_+	0.160419	0.0274046	0.0232266	7.11698	9.50371	0.175436	0.124618	0.8869	0.195265	0.124618	1.18433	0.0684439
B52	CG5059	chr3L_20508724_20508824_-	0.224885	0.592817	0.711071	45.1017	60.2269	0.232441	0.0589934	2.6607	0.291926	0.0589934	3.55299	0.100944
B52	CG5080	chr2L_1162147_1162999_-	0.0276799	6.77607	4.80113	11.19	9.30388	7.05437	4.20071	47.0057	6.52618	4.20071	39.0829	0.0118216
B52	CG5118	chr2L_1171914_1172022_-	0.250222	0.215835	0.189986	Inf	Inf	0.0591267	0	0.8869	0.0789553	0	1.18433	0.122257
B52	CG5149	chr2L_7386649_7387974_-	0.218202	1.1917	0.632624	24.8789	19.9333	0.461994	0.178243	4.4345	0.403226	0.178243	3.55299	0.0971386
B52	CG5151	chr3L_16137137_16141507_-	0.77311	0.215835	0.693996	1.91435	2.55635	10.8137	10.1924	19.5118	11.2499	10.1924	26.0552	0.241181
B52	CG5168	chr2L_10424099_10424370_+	0.317452	0.472529	0.774792	4.85957	6.48927	1.83572	1.46005	7.0952	1.99435	1.46005	9.47463	0.149368
B52	CG5174	chr2R_14309059_14310436_+	0.00991847	9.60066	10.0626	4.74058	5.24958	19.1668	15.3411	72.7258	19.6873	15.3411	80.5344	0.00422004
B52	CG5174	chr2R_14311241_14311373_+	0.980076	0.335331	0.0350653	5.68659	3.79682	0.81877	0.623854	3.5476	0.740174	0.623854	2.36866	0.311567
B52	CG5174	chr2R_14311377_14311473_+	0.190134	1.02761	0.65927	15.7182	13.9929	0.670741	0.338551	5.3214	0.631802	0.338551	4.73732	0.0822962
B52	CG5174	chr2R_14311992_14312111_+	0.0787747	3.50406	2.16023	64.7914	47.1925	0.790929	0.150574	9.7559	0.614268	0.150574	7.10598	0.03307
B52	CG5174	chr2R_14312172_14312376_+	0.0404635	6.86073	3.90781	57.1538	38.1604	1.32498	0.27932	15.9642	0.971296	0.27932	10.659	0.0170717
B52	CG5174	chr2R_14312582_14312844_+	0.159533	1.06017	1.14174	6.29681	7.35743	1.52469	1.12679	7.0952	1.60436	1.12679	8.2903	0.0679982
B52	CG5191	chr3R_16389790_16391512_+	0.999983	0.034298	0.751231	1.91007	3.82594	3.94	3.71463	7.0952	4.41445	3.71463	14.212	0.36599
B52	CG5196	chr3R_8235162_8235996_+	0.737702	2.49884	0.555183	8.45197	4.10415	3.45543	2.30855	19.5118	2.78629	2.30855	9.47463	0.233934
B52	CG5261	chr2L_7427362_7427727_+	0.270583	0.327647	0.189986	9.34906	8.3229	0.443002	0.284595	2.6607	0.423533	0.284595	2.36866	0.133698
B52	CG5323	chr2R_14502753_14502812_+	0.2276	0.582592	0.698469	58.2533	77.7891	0.22001	0.0456746	2.6607	0.279496	0.0456746	3.55299	0.102568
B52	CG5346	chr3R_18346411_18346756_-	0.147543	1.42491	1.91647	8.66809	11.575	1.70086	1.1255	9.7559	1.91897	1.1255	13.0276	0.0622238
B52	CG5346	chr3R_18352806_18354117_-	0.195929	7.52647	2.36587	4.47253	2.90089	17.0944	13.881	62.083	15.64	13.881	40.2672	0.0855278
B52	CG5381	chr2L_10321803_10322475_-	0.29331	0.030223	0.0611764	3.65574	4.88172	0.571115	0.485209	1.7738	0.610773	0.485209	2.36866	0.141863
B52	CG5399	chr3R_11521188_11521470_+	1	0.607753	0.0085334	26.3726	11.7389	0.271543	0.100889	2.6607	0.173118	0.100889	1.18433	0.376267
B52	CG5445	chrX_17198404_17198730_+	0.345285	0.488703	0.867314	3.57342	4.77179	2.90774	2.48194	8.869	3.10603	2.48194	11.8433	0.15659
B52	CG5447	chr3R_22278380_22278575_+	0.662362	0.765593	0.189986	6.53159	4.361	1.48688	1.08629	7.0952	1.32969	1.08629	4.73732	0.219718
B52	CG5447	chr3R_22278745_22278810_+	0.250222	0.215835	0.189986	Inf	Inf	0.0591267	0	0.8869	0.0789553	0	1.18433	0.122257
B52	CG5484	chr3R_22543749_22544049_+	0.665702	3.59064	0.831459	10.6743	5.13144	3.41688	2.07719	22.1725	2.64931	2.07719	10.659	0.220243
B52	CG5498	chr3L_20376041_20376109_-	0.250222	0.215835	0.189986	Inf	Inf	0.0591267	0	0.8869	0.0789553	0	1.18433	0.122257
B52	CG5522	chr2R_12671388_12672274_+	0.250222	0.215835	0.189986	2.30406	2.63721	2.92876	2.69451	6.2083	2.9886	2.69451	7.10598	0.122257
B52	CG5522	chr2R_12672414_12674679_+	0.871316	0.117178	0.429953	2.09536	3.07786	4.54177	4.23269	8.869	4.81901	4.23269	13.0276	0.264058
B52	CG5522	chr2R_12674993_12675659_+	0.236663	0.0114669	0.0294151	1.60398	2.14189	1.1504	1.10587	1.7738	1.19006	1.10587	2.36866	0.107638
B52	CG5525	chr2L_12690556_12690618_-	0.250222	0.215835	0.189986	Inf	Inf	0.0591267	0	0.8869	0.0789553	0	1.18433	0.122257
B52	CG5525	chr2L_12692218_12692716_-	0.0957512	4.56702	2.22485	13.9934	9.34309	2.83875	1.52112	21.2856	2.36717	1.52112	14.212	0.0399484
B52	CG5535	chr3L_17847808_17848532_-	0.381704	0.554195	1.08253	10.0892	16.8409	0.564687	0.351622	3.5476	0.722957	0.351622	5.92165	0.164841
B52	CG5535	chr3L_17848789_17849745_-	0.629306	0.263115	0.0784186	1.5612	1.41763	14.7336	14.2023	22.1725	14.5977	14.2023	20.1336	0.214101
B52	CG5554	chr2R_19732855_19733057_+	0.0818393	2.62483	2.01134	25.3132	23.6615	0.91828	0.350371	8.869	0.8797	0.350371	8.2903	0.0342976
B52	CG5554	chr2R_19733464_19733629_+	0.147646	1.26681	1.48692	35.7488	47.7374	0.329128	0.099237	3.5476	0.408442	0.099237	4.73732	0.0622431
B52	CG5577	chr3L_17833824_17834386_-	0.240503	0.109435	0.0901121	9.68436	12.9321	0.144602	0.0915807	0.8869	0.164431	0.0915807	1.18433	0.110242
B52	CG5604	chr2L_10291144_10292209_-	0.109218	2.4232	4.07092	3.27259	4.37008	12.4827	10.8404	35.476	13.2759	10.8404	47.3732	0.0454053
B52	CG5618	chr3L_20348230_20348404_+	0.228044	0.649734	0.414841	40.5445	36.0943	0.238629	0.0656241	2.6607	0.21916	0.0656241	2.36866	0.102857
B52	CG5642	chr3L_12138351_12139055_-	0.291599	2.02347	0.790896	6.29489	4.48316	2.85939	2.11338	13.3035	2.60413	2.11338	9.47463	0.141326
B52	CG5646	chr3R_23386237_23386484_-	0.483254	0.34976	0.743851	8.45324	14.1101	0.628202	0.419674	3.5476	0.786472	0.419674	5.92165	0.186248
B52	CG5676	chr2L_10255271_10255720_-	0.415459	0.111672	0.189986	2.00021	2.67099	2.36485	2.21702	4.4345	2.46399	2.21702	5.92165	0.171943
B52	CG5703	chrX_17527142_17527295_+	0.963457	0.140316	0.0125191	12.9452	8.64323	0.246142	0.137024	1.7738	0.206844	0.137024	1.18433	0.29877
B52	CG5707	chr3L_2190411_2191141_-	0.999996	0.437965	0.0105672	6.18814	3.30535	0.964472	0.716613	4.4345	0.826749	0.716613	2.36866	0.369509
B52	CG5745	chr3R_16928641_16929143_+	0.516941	0.872014	0.260972	8.3196	5.55483	0.95174	0.639622	5.3214	0.833846	0.639622	3.55299	0.192535
B52	CG5789	chr3R_20369148_20369421_-	0.315563	0.0374666	0.0830769	3.31906	4.43214	0.617053	0.534428	1.7738	0.65671	0.534428	2.36866	0.148874
B52	CG5792	chr2L_12718057_12719044_-	0.100329	2.48329	1.68251	5.06182	4.59635	5.56649	4.38034	22.1725	5.43056	4.38034	20.1336	0.0417724
B52	CG5792	chr2L_12721563_12721652_-	0.250222	0.215835	0.189986	Inf	Inf	0.0591267	0	0.8869	0.0789553	0	1.18433	0.122257
B52	CG5805	chr3R_20612625_20612713_-	0.352742	0.215835	0.337799	Inf	Inf	0.0591267	0	0.8869	0.157911	0	2.36866	0.15825
B52	CG5808	chr3R_20640979_20641040_-	0.241254	0.121537	0.0901121	13.5148	18.0472	0.120376	0.0656241	0.8869	0.140204	0.0656241	1.18433	0.110884
B52	CG5815	chr3R_22938413_22938552_+	0.999991	0.470074	0.0127298	15.5787	6.93437	0.336785	0.170791	2.6607	0.23836	0.170791	1.18433	0.367755
B52	CG5835	chr3R_14975355_14977210_-	0.995641	5.51388	0.548883	23.4549	6.52516	2.26605	0.90751	21.2856	1.24179	0.90751	5.92165	0.332192
B52	CG5853	chr2L_9943059_9944294_-	0.357554	0.215835	0.0901121	5.93391	5.2826	0.595876	0.448389	2.6607	0.576407	0.448389	2.36866	0.159677
B52	CG5853	chr2L_9944682_9947265_-	0.463374	2.06107	0.625648	10.7362	6.61691	1.77096	1.07391	11.5297	1.47605	1.07391	7.10598	0.182283
B52	CG5854	chr3R_19760067_19760285_+	0.253983	0.496714	0.655017	15.7288	21.0035	0.558773	0.281936	4.4345	0.657916	0.281936	5.92165	0.125275
B52	CG5886	chr3R_21677527_21677641_+	0.240981	0.106943	0.0901121	10.3858	13.8687	0.138829	0.0853955	0.8869	0.158658	0.0853955	1.18433	0.110639
B52	CG5886	chr3R_21678297_21678538_+	0.453084	2.15584	0.659575	Inf	Inf	0.413887	0	6.2083	0.157911	0	2.36866	0.180586
B52	CG5953	chr2L_16511447_16519969_-	0.283577	0.18803	0.0901121	2.00549	2.00853	3.77505	3.5379	7.0952	3.77577	3.5379	7.10598	0.138796
B52	CG5955	chr3L_20460266_20460818_+	0.99852	0.527063	0.036152	5.04041	2.88461	1.56348	1.23171	6.2083	1.38646	1.23171	3.55299	0.342279
B52	CG5955	chr3L_20461069_20461226_+	0.336256	0.431268	0.717144	Inf	Inf	0.118253	0	1.7738	0.236866	0	3.55299	0.154297
B52	CG5973	chr2L_7441757_7443564_+	0.66038	0.219139	0.589728	16.1326	32.3141	0.220875	0.109952	1.7738	0.339487	0.109952	3.55299	0.219307
B52	CG6020	chr3L_20488620_20488724_+	0.250222	0.215835	0.189986	Inf	Inf	0.0591267	0	0.8869	0.0789553	0	1.18433	0.122257
B52	CG6041	chrX_5842387_5843122_+	0.751019	0.931222	3.20531	8.5884	21.0258	0.933056	0.619603	5.3214	1.4468	0.619603	13.0276	0.236767
B52	CG6084	chr3L_11613766_11614022_-	0.282111	0.132617	0.168485	4.61012	6.15616	0.477365	0.384762	1.7738	0.517022	0.384762	2.36866	0.138305
B52	CG6084	chr3L_11614204_11614313_-	0.150353	1.16034	0.994786	Inf	Inf	0.236507	0	3.5476	0.236866	0	3.55299	0.0637821
B52	CG6115	chr2L_16887678_16887792_-	0.763321	0.165682	0.486738	4.59603	8.18313	0.717698	0.578912	2.6607	0.856139	0.578912	4.73732	0.239299
B52	CG6126	chr3R_12025617_12028512_-	0.360283	0.457774	0.191791	2.02284	1.85709	7.49344	7.01508	14.1904	7.41592	7.01508	13.0276	0.160149
B52	CG6163	chr3L_11357019_11357708_-	0.993725	1.62674	0.180333	15.4426	5.62403	1.24003	0.631752	9.7559	0.826501	0.631752	3.55299	0.328462
B52	CG6227	chrX_15239797_15240130_+	0.276181	0.341039	0.189986	15.9558	14.2045	0.333017	0.166754	2.6607	0.313548	0.166754	2.36866	0.136111
B52	CG6259	chr3L_17613458_17613518_-	0.250222	0.215835	0.189986	Inf	Inf	0.0591267	0	0.8869	0.0789553	0	1.18433	0.122257
B52	CG6259	chr3L_17613995_17614200_-	0.368312	6.16063	1.70932	30.6059	12.9063	1.63728	0.550583	16.8511	0.987609	0.550583	7.10598	0.162252
B52	CG6279	chr3L_11087562_11087647_-	0.245847	0.0953842	0.0901121	8.93719	11.9344	0.151748	0.099237	0.8869	0.171576	0.099237	1.18433	0.114703
B52	CG6287	chr2L_11153565_11155082_-	0.966597	0.0845232	0.413376	19.4178	51.8594	0.101756	0.0456746	0.8869	0.20054	0.0456746	2.36866	0.300091
B52	CG6293	chr3R_6136241_6137183_-	1	0.0379659	1.28693	3.23193	12.9473	0.630501	0.548837	1.7738	0.985979	0.548837	7.10598	0.374304
B52	CG6325	chr3R_6232190_6232571_-	0.249481	0.442095	0.278073	4.02539	3.83953	1.85335	1.54229	6.2083	1.83424	1.54229	5.92165	0.119064
B52	CG6340	chrX_15376571_15377214_+	0.574998	0.52997	1.38623	3.8559	6.43626	2.19043	1.84009	7.0952	2.50697	1.84009	11.8433	0.20337
B52	CG6340	chrX_15378926_15379154_+	0.020888	6.78504	6.14498	20.1047	20.7454	2.2066	0.970511	19.5118	2.24805	0.970511	20.1336	0.00873751
B52	CG6379	chrX_3993925_3994025_-	0.967831	0.215835	0.0232266	8.81001	5.88226	0.30617	0.201339	1.7738	0.266872	0.201339	1.18433	0.301265
B52	CG6420	chr3R_22548837_22549888_-	0.558187	0.360563	0.869034	4.94974	8.2621	0.90545	0.716724	3.5476	1.06372	0.716724	5.92165	0.200244
B52	CG6422	chr3R_20862440_20862665_-	0.257689	0.51385	0.298657	26.3726	23.4779	0.271543	0.100889	2.6607	0.252074	0.100889	2.36866	0.12758
B52	CG6422	chr3R_20863705_20863932_-	0.746259	1.04004	0.216311	21.952	11.7255	0.484175	0.202009	4.4345	0.346452	0.202009	2.36866	0.235554
B52	CG6424	chr2R_13592696_13593858_-	0.835	0.0696116	0.225968	1.45325	2.10232	7.54475	7.32346	10.6428	7.86165	7.32346	15.3963	0.254655
B52	CG6424	chr2R_13596593_13603210_-	0.324803	1.39252	0.54531	2.22044	1.88687	19.0047	17.5748	39.0236	18.6139	17.5748	33.1612	0.151611
B52	CG6441	chr2L_7475872_7475931_+	0.2214	0.0783606	0.0645363	9.70889	12.9648	0.144386	0.0913493	0.8869	0.164215	0.0913493	1.18433	0.0988905
B52	CG6454	chr3R_20175958_20176448_+	0.188842	1.63188	2.93231	8.44793	13.5372	1.57112	1.04984	8.869	1.92732	1.04984	14.212	0.0818219
B52	CG6454	chr3R_20178074_20178905_+	0.227816	0.50687	0.559604	6.76395	7.74197	1.27055	0.917851	6.2083	1.33039	0.917851	7.10598	0.102722
B52	CG6455	chr3R_17846445_17846546_-	0.250222	0.215835	0.189986	Inf	Inf	0.0591267	0	0.8869	0.0789553	0	1.18433	0.122257
B52	CG6498	chr3L_15559900_15561305_+	0.194202	0.856142	0.590429	3.98439	3.86951	2.93569	2.44853	9.7559	2.91694	2.44853	9.47463	0.0844265
B52	CG6509	chr2L_11510851_11511055_-	0.245473	0.0957789	0.0901121	19.4178	25.9297	0.101756	0.0456746	0.8869	0.121585	0.0456746	1.18433	0.114371
B52	CG6512	chr3L_17234159_17234316_-	0.474204	0.304803	0.633566	17.8744	35.8031	0.210875	0.099237	1.7738	0.329487	0.099237	3.55299	0.184474
B52	CG6512	chr3L_17234820_17234884_-	0.272938	0.333824	0.189986	Inf	Inf	0.118253	0	1.7738	0.0789553	0	1.18433	0.134646
B52	CG6543	chr2R_9741411_9741606_-	0.999862	1.44471	0.0892689	12.7468	4.8633	0.868465	0.487048	6.2083	0.612489	0.487048	2.36866	0.35767
B52	CG6597	chr3L_20295938_20296166_+	0.531721	0.315099	0.717144	4.62913	7.41785	1.18973	0.957956	4.4345	1.36782	0.957956	7.10598	0.195281
B52	CG6597	chr3L_20301717_20301846_+	0.166775	0.0296979	0.0251515	7.72494	10.3156	0.166283	0.11481	0.8869	0.186111	0.11481	1.18433	0.0710938
B52	CG6621	chr3R_6716568_6716721_-	0.314969	0.398323	0.189986	9.46501	7.58351	0.732914	0.468515	4.4345	0.674147	0.468515	3.55299	0.148655
B52	CG6656	chr3R_17701353_17701436_+	0.950537	0.215835	0.0263879	13.7125	9.15558	0.238986	0.129356	1.7738	0.199688	0.129356	1.18433	0.292359
B52	CG6664	chr3L_17008367_17008772_-	0.160505	1.59091	0.960944	8.20952	6.97623	1.75953	1.18836	9.7559	1.66183	1.18836	8.2903	0.068502
B52	CG6686	chr2L_11987513_11987695_-	0.518356	0.614397	0.189986	14.3131	7.64526	0.584799	0.30982	4.4345	0.447076	0.30982	2.36866	0.192741
B52	CG6695	chr3R_20483332_20484042_+	0.00795492	13.9711	9.6932	18.1096	14.6993	5.34662	2.49768	45.2319	4.77878	2.49768	36.7142	0.00341937
B52	CG6695	chr3R_20484134_20484220_+	0.459529	0.265924	0.0901121	23.0935	15.4191	0.189942	0.0768094	1.7738	0.150644	0.0768094	1.18433	0.181547
B52	CG6701	chr2R_9862709_9862773_-	0.292124	0.0300643	0.0588399	4.29872	5.74033	0.503379	0.412634	1.7738	0.543036	0.412634	2.36866	0.141551
B52	CG6707	chr3L_9889847_9891028_-	0.240568	0.0930542	0.0551713	2.60564	2.78358	1.88406	1.70188	4.4345	1.90424	1.70188	4.73732	0.110337
B52	CG6767	chr3L_9679576_9680329_-	0.657641	0.213807	0.0415824	4.44165	3.95413	0.736479	0.599034	2.6607	0.717009	0.599034	2.36866	0.218786
B52	CG6767	chr3L_9680354_9681630_-	0.549769	0.030223	0.0901121	2.37194	3.16739	1.22434	1.12174	2.6607	1.28382	1.12174	3.55299	0.198478
B52	CG6767	chr3L_9681700_9682364_-	0.362546	0.125111	0.189986	2.94831	3.93704	1.01967	0.902451	2.6607	1.07915	0.902451	3.55299	0.160873
B52	CG6767	chr3L_9682549_9687332_-	1	0.76742	0.0149777	2.64257	1.68767	8.56457	7.71928	20.3987	8.07317	7.71928	13.0276	0.373318
B52	CG6843	chr3L_18894903_18894980_+	0.278038	0.215835	0.126942	9.71744	8.65084	0.432933	0.273807	2.6607	0.413464	0.273807	2.36866	0.136913
B52	CG6891	chrX_18670889_18673665_+	0.251473	0.274439	0.272626	1.84282	1.9335	14.2328	13.4757	24.8332	14.3143	13.4757	26.0552	0.123454
B52	CG6891	chrX_18673879_18674713_+	0.147827	1.17401	1.22078	3.06167	3.30219	8.56683	7.53164	23.0594	8.6876	7.53164	24.8709	0.0623396
B52	CG6903	chrX_4813627_4813931_+	0.144251	0.0195189	0.0185954	6.85627	9.15558	0.179859	0.129356	0.8869	0.199688	0.129356	1.18433	0.060645
B52	CG7033	chrX_8985211_8985442_+	0.848341	1.19613	0.210874	10.369	5.93416	0.972706	0.598735	6.2083	0.795685	0.598735	3.55299	0.257838
B52	CG7065	chrX_9038981_9040040_+	0.0490687	4.25194	3.09796	7.66351	6.94418	4.67996	3.24045	24.8332	4.52457	3.24045	22.5023	0.0206115
B52	CG7091	chr3R_8805541_8805676_+	0.141855	0.017071	0.0184908	8.60403	11.4895	0.155334	0.10308	0.8869	0.175163	0.10308	1.18433	0.059667
B52	CG7110	chr2L_13399832_13403223_+	0.995065	0.0930542	0.681726	1.97272	3.35273	5.26611	4.94541	9.7559	5.72109	4.94541	16.5806	0.331123
B52	CG7115	chr2L_7822057_7822641_+	0.919389	0.36596	1.62028	30.8997	103.156	0.171831	0.057405	1.7738	0.448354	0.057405	5.92165	0.279224
B52	CG7139	chr3L_22063263_22063385_-	0.289161	0.326695	0.429203	10.2167	13.643	0.420444	0.260426	2.6607	0.47993	0.260426	3.55299	0.140602
B52	CG7139	chr3L_22063539_22063867_-	0.059396	3.52179	2.66399	20.6444	19.2973	0.992235	0.429609	8.869	0.953655	0.429609	8.2903	0.0247985
B52	CG7185	chr3L_8305851_8306110_-	0.248441	0.250677	0.189986	5.63101	5.63956	0.824517	0.630011	3.5476	0.824877	0.630011	3.55299	0.117926
B52	CG7185	chr3L_8306252_8307056_-	0.199883	0.752016	0.548542	4.11389	3.99529	2.86375	2.37145	9.7559	2.845	2.37145	9.47463	0.0876483
B52	CG7191	chr2L_7773659_7774200_+	0.405684	0.246883	0.0901121	30.0678	20.0756	0.173314	0.0589934	1.7738	0.134016	0.0589934	1.18433	0.170203
B52	CG7192	chrX_17993780_17994097_-	0.217642	0.584667	0.426048	9.57182	9.58636	0.582428	0.37063	3.5476	0.582787	0.37063	3.55299	0.096846
B52	CG7192	chrX_17994295_17995125_-	0.0760345	2.47164	2.66976	8.74921	10.1256	2.30607	1.52054	13.3035	2.44559	1.52054	15.3963	0.0318522
B52	CG7206	chrX_17984271_17984349_-	0.791427	0.93247	0.189986	16.2939	8.70329	0.549646	0.272157	4.4345	0.411923	0.272157	2.36866	0.245307
B52	CG7215+Prx5	chr3R_13991883_13992076_-	0.320898	0.145212	0.189986	4.12663	5.51053	0.779159	0.644764	2.6607	0.838645	0.644764	3.55299	0.150328
B52	CG7220	chr2R_6620302_6622885_+	0.166526	1.39017	2.03804	4.70539	6.28338	3.29066	2.6388	12.4166	3.56826	2.6388	16.5806	0.0709762
B52	CG7324	chr3L_21335553_21336030_-	0.251456	0.266339	0.262981	4.24209	4.72059	1.52556	1.25443	5.3214	1.56558	1.25443	5.92165	0.12342
B52	CG7324	chr3L_21336198_21336675_-	0.221155	0.768161	0.478663	5.90207	5.25425	1.7944	1.35242	7.9821	1.73599	1.35242	7.10598	0.0987154
B52	CG7337	chr2L_1937584_1937865_+	0.233057	1.60817	0.746412	Inf	Inf	0.236507	0	3.5476	0.157911	0	2.36866	0.105475
B52	CG7337	chr2L_1938620_1938864_+	0.183281	0.88984	1.02109	Inf	Inf	0.17738	0	2.6607	0.236866	0	3.55299	0.0791262
B52	CG7337	chr2L_1941394_1941581_+	0.244006	0.0975812	0.0901121	16.0629	21.4497	0.11066	0.0552143	0.8869	0.130489	0.0552143	1.18433	0.112888
B52	CG7371	chr2L_5522008_5522161_-	0.985923	0.0275889	0.206007	8.23026	21.9807	0.159703	0.107761	0.8869	0.258487	0.107761	2.36866	0.317478
B52	CG7420	chr2L_1502185_1502610_-	0.412371	0.727588	1.63196	11.0952	20.7425	0.668665	0.399677	4.4345	0.925719	0.399677	8.2903	0.171325
B52	CG7458	chr3L_21948960_21949479_+	0.527831	0.215835	0.0711857	6.09599	5.42689	0.58475	0.436467	2.6607	0.56528	0.436467	2.36866	0.194617
B52	CG7492	chr3L_7646501_7646560_-	0.240402	0.110787	0.0901121	9.68436	12.9321	0.144602	0.0915807	0.8869	0.164431	0.0915807	1.18433	0.110034
B52	CG7492	chr3L_7647200_7647352_-	0.244278	0.0969041	0.0901121	11.5468	15.4191	0.130815	0.0768094	0.8869	0.150644	0.0768094	1.18433	0.113186
B52	CG7518	chr3R_8827698_8828350_+	0.154266	1.43719	0.95441	4.37566	4.04521	3.22794	2.63496	11.5297	3.16989	2.63496	10.659	0.0655579
B52	CG7530	chr3R_10553050_10554503_-	0.404668	0.157928	0.25114	2.91657	3.89466	1.71472	1.52045	4.4345	1.81386	1.52045	5.92165	0.169879
B52	CG7530	chr3R_10554801_10556232_-	0.175984	0.0323417	0.0258454	2.19275	2.44008	2.61979	2.42682	5.3214	2.65981	2.42682	5.92165	0.0758082
B52	CG7546	chr3L_7506493_7506622_+	0.43602	0.537868	0.189986	Inf	Inf	0.118253	0	1.7738	0.0789553	0	1.18433	0.176388
B52	CG7546	chr3L_7507455_7507748_+	0.669985	0.247752	0.667816	4.74559	8.44942	0.70067	0.560667	2.6607	0.839111	0.560667	4.73732	0.220884
B52	CG7546	chr3L_7508682_7508740_+	0.250222	0.215835	0.189986	Inf	Inf	0.0591267	0	0.8869	0.0789553	0	1.18433	0.122257
B52	CG7556	chrX_19072281_19073032_-	0.250222	0.215835	0.189986	4.35784	4.65542	1.24539	1.01759	4.4345	1.26557	1.01759	4.73732	0.122257
B52	CG7580	chr3L_17468236_17468509_+	0.260605	0.300009	0.189986	5.44973	5.458	0.844077	0.650968	3.5476	0.844436	0.650968	3.55299	0.129245
B52	CG7611	chr3L_21520037_21520283_+	0.969361	0.0987433	0.532121	4.0164	8.93888	0.795675	0.662459	2.6607	1.01307	0.662459	5.92165	0.302339
B52	CG7627	chr2L_8360519_8360946_-	0.208435	0.603415	0.488603	3.06774	3.18619	2.96062	2.60195	7.9821	2.98117	2.60195	8.2903	0.0918413
B52	CG7627	chr2L_8361199_8362038_-	0.309274	0.119393	0.171546	1.45005	1.69429	10.0798	9.78614	14.1904	10.2391	9.78614	16.5806	0.146858
B52	CG7646	chr3L_19986423_19987267_+	0.357554	0.215835	0.0901121	2.18235	2.03995	4.38431	4.06397	8.869	4.34573	4.06397	8.2903	0.159677
B52	CG7656	chr3L_15579701_15580104_-	0.138172	1.35312	1.53566	28.6036	35.2579	1.14486	0.403085	11.5297	1.32368	0.403085	14.212	0.0580803
B52	CG7668	chr3L_19996093_19996402_+	0.0482688	5.65721	3.3321	51.026	34.069	1.65768	0.38239	19.5118	1.22541	0.38239	13.0276	0.0202846
B52	CG7694:fray	chr3R_14410309_14411601_+	0.999987	0.0673995	1.16253	1.39042	2.24085	18.9796	18.4981	25.7201	20.0283	18.4981	41.4515	0.366538
B52	CG7702	chr3R_14495421_14496859_+	0.999296	0.0318975	0.428051	1.70209	3.03054	3.27272	3.12639	5.3214	3.5496	3.12639	9.47463	0.348332
B52	CG7720	chr3R_14586877_14587323_-	0.731204	0.262357	0.0615557	2.75137	2.29629	2.87988	2.57879	7.0952	2.80165	2.57879	5.92165	0.2327
B52	CG7745	chr2R_7195603_7195660_+	0.254604	0.0911584	0.0901121	16.8784	22.5387	0.10817	0.0525466	0.8869	0.127999	0.0525466	1.18433	0.125641
B52	CG7766	chrX_8990009_8990798_-	0.299202	0.385686	0.196717	3.38818	3.23174	2.12407	1.83234	6.2083	2.10496	1.83234	5.92165	0.143764
B52	CG7766	chrX_8990859_8991387_-	0.601492	0.689323	1.93676	4.81881	8.57978	2.07816	1.65645	7.9821	2.49348	1.65645	14.212	0.208487
B52	CG7766	chrX_8992447_8993346_-	0.238128	0.738704	1.08253	2.51594	3.1357	5.82208	5.28769	13.3035	6.04055	5.28769	16.5806	0.10861
B52	CG7766	chrX_8993495_8994545_-	0.941632	0.232397	1.08731	2.23564	3.68782	7.29962	6.74407	15.0773	7.95253	6.74407	24.8709	0.287812
B52	CG7766	chrX_8994691_8995128_-	0.136485	1.33501	1.38881	4.5411	5.13108	3.13835	2.53897	11.5297	3.23821	2.53897	13.0276	0.0573011
B52	CG7766	chrX_8997134_8997477_-	1	0.00880597	0.611666	7.72494	30.9467	0.166283	0.11481	0.8869	0.344022	0.11481	3.55299	0.377041
B52	CG7770	chr3L_19916995_19917081_+	0.99916	0.0170312	0.250076	8.43918	22.5387	0.157214	0.105093	0.8869	0.255998	0.105093	2.36866	0.346594
B52	CG7841	chr3L_15499446_15500572_-	0.376485	0.460488	0.861649	2.90569	3.88014	3.78408	3.35752	9.7559	4.00219	3.35752	13.0276	0.163994
B52	CG7852	chr3L_1537243_1537425_+	0.977541	0.478285	0.0556391	3.89281	2.59915	2.17415	1.82264	7.0952	2.01695	1.82264	4.73732	0.309198
B52	CG7852	chr3L_1538155_1538719_+	0.376128	0.626313	1.26424	Inf	Inf	0.118253	0	1.7738	0.236866	0	3.55299	0.16393
B52	CG7879	chr3L_1562998_1563965_-	0.502181	0.638921	1.58778	3.78004	6.30964	3.33734	2.81552	10.6428	3.81215	2.81552	17.7649	0.189844
B52	CG7879	chr3L_1564281_1565391_-	0.14326	1.23743	1.12992	4.50237	4.67622	4.37363	3.54573	15.9642	4.41472	3.54573	16.5806	0.0602604
B52	CG7911	chr3R_25830172_25830303_-	0.204738	0.631555	0.5126	17.2078	17.234	0.428925	0.206162	3.5476	0.429284	0.206162	3.55299	0.0902345
B52	CG7912	chr3R_25831989_25832058_-	0.250222	0.215835	0.189986	Inf	Inf	0.0591267	0	0.8869	0.0789553	0	1.18433	0.122257
B52	CG7912	chr3R_25833955_25834735_-	0.182285	1.61265	0.877703	6.67579	4.95254	4.94432	3.58704	23.9463	4.53223	3.58704	17.7649	0.078634
B52	CG7920	chr3R_25837784_25840536_-	0.0902249	2.17498	2.55072	2.99314	3.412	13.763	12.1487	36.3629	14.1023	12.1487	41.4515	0.0377926
B52	CG7945	chr3L_15515681_15516067_-	0.0392284	4.43817	3.87535	9.35076	9.71182	2.65772	1.70726	15.9642	2.69882	1.70726	16.5806	0.0166198
B52	CG7950	chr3R_25882757_25882837_+	0.997165	0.221612	0.0130999	11.7455	7.84222	0.259205	0.15102	1.7738	0.219907	0.15102	1.18433	0.335614
B52	CG7967	chr3L_1652265_1652331_-	0.618777	0.215835	0.553824	Inf	Inf	0.0591267	0	0.8869	0.157911	0	2.36866	0.211772
B52	CG7967	chr3L_1652483_1652566_-	0.146626	1.2976	1.56438	36.6978	49.0047	0.408416	0.120838	4.4345	0.507559	0.120838	5.92165	0.0618574
B52	CG7971	chr3L_1655152_1655253_-	0.373306	0.59868	1.18995	Inf	Inf	0.118253	0	1.7738	0.236866	0	3.55299	0.163289
B52	CG7971	chr3L_1658591_1659845_-	0.739175	2.14812	0.479983	11.7663	6.28491	1.29478	0.753761	8.869	1.01933	0.753761	4.73732	0.23414
B52	CG7971	chr3L_1659991_1660598_-	0.347733	0.699423	0.290581	6.58852	5.27882	0.923827	0.673065	4.4345	0.86506	0.673065	3.55299	0.157225
B52	CG7971	chr3L_1661593_1661706_-	0.244964	0.385188	0.419613	Inf	Inf	0.118253	0	1.7738	0.157911	0	2.36866	0.113743
B52	CG7971	chr3L_1662382_1663919_-	0.0146529	9.4483	7.20598	9.08854	8.16072	8.71192	5.6599	51.4402	8.36183	5.6599	46.1888	0.00633415
B52	CG7971	chr3L_1664242_1664531_-	0.592455	0.689323	0.189986	4.31061	2.8781	2.51158	2.05748	8.869	2.31509	2.05748	5.92165	0.206486
B52	CG8008	chr2R_5046500_5046582_-	0.233151	0.0961679	0.0887001	2.50019	3.33865	0.390211	0.354733	0.8869	0.410039	0.354733	1.18433	0.105552
B52	CG8008	chr2R_5048456_5048540_-	0.285564	0.0757981	0.0901121	3.13559	4.18713	0.646239	0.565699	1.7738	0.685897	0.565699	2.36866	0.139475
B52	CG8010	chrX_19162074_19162537_-	0.688584	1.50581	0.36051	9.83806	5.25493	1.43267	0.901499	8.869	1.15722	0.901499	4.73732	0.223572
B52	CG8026+CG45085	chr2R_5077852_5078780_-	0.236844	2.38971	0.990037	3.24578	2.52833	11.3097	9.83691	31.9284	10.8392	9.83691	24.8709	0.107772
B52	CG8026	chr2R_5076726_5077774_-	0.0809918	2.41939	2.87566	3.56779	4.06707	11.9367	10.192	36.3629	12.276	10.192	41.4515	0.0339681
B52	CG8031	chr3R_8834869_8834925_-	0.751126	0.0610978	0.189986	3.01675	6.04266	0.667038	0.587984	1.7738	0.785651	0.587984	3.55299	0.236892
B52	CG8036	chr3R_4495651_4496372_+	0.316677	0.224346	0.316253	2.87621	3.41402	3.12234	2.77521	7.9821	3.22184	2.77521	9.47463	0.149222
B52	CG8036	chr3R_4496628_4497432_+	0.923155	0.0119377	0.0901121	2.00929	2.68313	2.35549	2.20699	4.4345	2.45464	2.20699	5.92165	0.28039
B52	CG8046	chr2R_5050766_5050833_-	0.250222	0.215835	0.189986	Inf	Inf	0.0591267	0	0.8869	0.0789553	0	1.18433	0.122257
B52	CG8046	chr2R_5050980_5051207_-	0.425612	2.94444	0.888163	7.14407	4.5189	3.32491	2.35875	16.8511	2.9121	2.35875	10.659	0.174348
B52	CG8079	chr2R_11107835_11108933_+	0.980697	1.62392	0.193385	12.5475	5.02663	1.25098	0.706832	8.869	0.896576	0.706832	3.55299	0.312001
B52	CG8080	chr2R_4978557_4978911_-	0.111343	2.01665	1.46578	12.2999	11.4973	1.26426	0.721066	8.869	1.22568	0.721066	8.2903	0.0464739
B52	CG8080	chr2R_4979291_4979936_-	0.479507	0.582849	0.189986	4.10893	3.13537	3.64817	3.02186	12.4166	3.45204	3.02186	9.47463	0.185562
B52	CG8083	chr2R_4966447_4967620_+	0.250222	0.215835	0.189986	Inf	Inf	0.0591267	0	0.8869	0.0789553	0	1.18433	0.122257
B52	CG8108	chr3L_9857903_9858157_+	0.920111	0.352454	1.54746	7.49647	20.021	0.678194	0.473236	3.5476	1.07333	0.473236	9.47463	0.279564
B52	CG8108	chr3L_9858499_9859413_+	0.941666	0.263702	0.036152	3.25209	2.48155	2.19564	1.90902	6.2083	2.09757	1.90902	4.73732	0.28786
B52	CG8108	chr3L_9859462_9860413_+	0.000318628	42.9122	42.2878	17.6331	18.8632	19.1989	9.10385	160.529	19.9454	9.10385	171.728	0.000155544
B52	CG8108	chr3L_9860845_9861353_+	0.00259108	19.0032	17.9405	15.0927	15.7616	8.88986	4.58355	69.1782	9.09425	4.58355	72.2441	0.0011347
B52	CG8121	chr3R_5161975_5162204_+	0.250222	0.215835	0.189986	Inf	Inf	0.0591267	0	0.8869	0.0789553	0	1.18433	0.122257
B52	CG8145	chr3R_4549673_4549855_+	0.844305	0.0922154	0.316253	15.0339	40.1512	0.114187	0.0589934	0.8869	0.212971	0.0589934	2.36866	0.256682
B52	CG8176	chr3R_5348614_5349257_+	0.185088	0.798056	0.667816	9.37098	10.0109	0.737302	0.473216	4.4345	0.75749	0.473216	4.73732	0.0800116
B52	CG8176	chr3R_5349519_5349923_+	0.331399	0.323851	0.498519	3.84469	5.13404	1.37215	1.15341	4.4345	1.47129	1.15341	5.92165	0.153028
B52	CG8184	chrX_15606812_15607673_+	0.488602	0.741265	1.83483	4.85553	8.33641	1.60725	1.2786	6.2083	1.90396	1.2786	10.659	0.187161
B52	CG8184	chrX_15615433_15615578_+	0.250222	0.215835	0.189986	Inf	Inf	0.0591267	0	0.8869	0.0789553	0	1.18433	0.122257
B52	CG8188	chrX_17595810_17596233_-	0.264454	0.229092	0.157217	3.64221	3.47404	2.00479	1.70454	6.2083	1.98568	1.70454	5.92165	0.131136
B52	CG8192	chr2R_11433411_11437260_-	0.867932	0.0830048	0.285932	2.22858	3.34795	3.44449	3.18373	7.0952	3.68207	3.18373	10.659	0.263304
B52	CG8195	chr2R_11452552_11453078_-	0.250222	0.215835	0.189986	Inf	Inf	0.0591267	0	0.8869	0.0789553	0	1.18433	0.122257
B52	CG8235	chr2R_4815390_4815445_-	0.250222	0.215835	0.189986	Inf	Inf	0.0591267	0	0.8869	0.0789553	0	1.18433	0.122257
B52	CG8258	chr2R_4794179_4794357_-	0.250927	0.092958	0.0901121	3.3711	4.50163	0.609353	0.526178	1.7738	0.64901	0.526178	2.36866	0.122966
B52	CG8289	chrX_17528387_17528606_-	0.280541	0.305344	0.387836	6.0215	8.04086	0.589789	0.441867	2.6607	0.649275	0.441867	3.55299	0.137834
B52	CG8289	chrX_17529011_17529374_-	0.998209	0.37243	0.0238475	7.41303	3.95962	0.853957	0.598203	4.4345	0.716234	0.598203	2.36866	0.340374
B52	CG8301	chr3R_5410293_5410937_+	0.134721	1.3495	1.26424	13.0706	14.5449	0.734746	0.407127	5.3214	0.774762	0.407127	5.92165	0.0565232
B52	CG8306	chr2R_12478916_12481587_-	0.20872	0.582592	0.503347	1.77372	1.77641	35.7554	34.0016	60.3092	35.7615	34.0016	60.4008	0.0919394
B52	CG8311	chr2R_12475017_12475108_-	0.111337	0.00734602	0.0122736	6.60808	8.82416	0.184393	0.134214	0.8869	0.204222	0.134214	1.18433	0.0464558
B52	CG8312	chr3R_5448497_5448665_+	0.250222	0.215835	0.189986	Inf	Inf	0.0591267	0	0.8869	0.0789553	0	1.18433	0.122257
B52	CG8331	chr2R_10058228_10058664_+	0.159857	1.05864	1.14206	7.40596	8.65341	1.36718	0.958039	7.0952	1.44686	0.958039	8.2903	0.068192
B52	CG8334	chr3L_19864555_19866860_+	0.512155	0.271686	0.597569	1.84362	2.33233	9.65426	9.1402	16.8511	9.95205	9.1402	21.3179	0.192037
B52	CG8334	chr3L_19870731_19871932_+	0.141731	1.25781	1.1599	3.49803	3.68773	5.61956	4.81731	16.8511	5.68049	4.81731	17.7649	0.0595904
B52	CG8360	chr2L_8213283_8213336_+	0.755421	0.215835	0.673552	Inf	Inf	0.0591267	0	0.8869	0.236866	0	3.55299	0.237733
B52	CG8368	chr3L_6597285_6597465_+	0.221829	0.604442	0.725023	48.1887	64.3491	0.228913	0.0552143	2.6607	0.288399	0.0552143	3.55299	0.0992402
B52	CG8379	chr3R_4651131_4651354_+	0.97465	0.0833889	0.42832	11.5468	30.8381	0.130815	0.0768094	0.8869	0.229599	0.0768094	2.36866	0.306578
B52	CG8405	chr2R_11937125_11944030_+	0.451108	0.139396	0.248924	2.373	3.1688	4.07957	3.73747	8.869	4.27786	3.73747	11.8433	0.180098
B52	CG8405	chr2R_11944131_11944430_+	0.886859	0.545649	0.0901121	7.6075	4.06349	0.839685	0.582912	4.4345	0.701962	0.582912	2.36866	0.268187
B52	CG8405	chr2R_11945083_11945959_+	0.394716	1.2773	0.45082	5.96598	4.24892	2.96813	2.22989	13.3035	2.71288	2.22989	9.47463	0.167613
B52	CG8500	chr3R_5610483_5611473_+	0.0753399	2.86922	2.16767	2.56838	2.47994	24.7923	22.4455	57.6485	24.66	22.4455	55.6635	0.0316428
B52	CG8516	chr3R_5619317_5619502_+	0.253542	0.0918586	0.0901121	4.08247	5.45156	0.523779	0.434492	1.7738	0.563436	0.434492	2.36866	0.124942
B52	CG8545	chr2R_8356355_8356416_+	0.280558	0.106308	0.12256	1.98688	5.3064	0.475746	0.446378	0.8869	0.57453	0.446378	2.36866	0.137867
B52	CG8578	chrX_15738706_15739359_+	0.206917	1.66156	3.19444	3.55104	5.13708	7.01361	5.99418	21.2856	7.64741	5.99418	30.7926	0.0911548
B52	CG8611	chrX_17309193_17309577_-	0.245182	0.382854	0.417684	Inf	Inf	0.118253	0	1.7738	0.157911	0	2.36866	0.114058
B52	CG8611	chrX_17309878_17313480_-	0.0131879	8.90634	7.96244	14.5975	14.5064	4.98082	2.61254	38.1367	4.96494	2.61254	37.8985	0.0056045
B52	CG8635	chr2R_4519012_4519137_-	0.0588945	3.18705	2.85501	51.6804	53.6759	0.676295	0.154451	7.9821	0.696841	0.154451	8.2903	0.0246473
B52	CG8636	chrX_2504216_2504278_-	0.0401807	8.98157	4.39624	19.5634	11.8746	4.46332	1.99472	39.0236	3.44085	1.99472	23.6866	0.017018
B52	CG8668	chr2L_8127973_8131286_+	0.999974	0.0330161	0.689075	1.54037	2.54093	10.1407	9.7881	15.0773	10.7936	9.7881	24.8709	0.36464
B52	CG8677	chr2L_21221787_21222435_+	0.898811	0.936667	0.173458	12.9615	6.49061	0.983924	0.547404	7.0952	0.747777	0.547404	3.55299	0.272118
B52	CG8713	chr2R_3979671_3982583_+	0.284802	0.0296979	0.0551713	4.09553	5.469	0.522486	0.433107	1.7738	0.562143	0.433107	2.36866	0.139118
B52	CG8735	chr2R_4487207_4487315_-	0.99136	0.215835	0.0164222	15.0105	10.0222	0.228546	0.118171	1.7738	0.189248	0.118171	1.18433	0.324701
B52	CG8814	chr2L_2876411_2876783_+	0.282596	0.179289	0.189986	7.54681	10.0777	0.337624	0.23504	1.7738	0.377281	0.23504	2.36866	0.138423
B52	CG8839	chr2R_8229602_8231964_-	0.157595	1.72772	1.0203	4.32054	3.84631	3.76075	3.07913	13.3035	3.66341	3.07913	11.8433	0.0670478
B52	CG8878	chr2R_8037645_8038034_-	0.228893	0.438419	0.42759	4.7822	5.32163	1.39333	1.11275	5.3214	1.43334	1.11275	5.92165	0.103165
B52	CG8908	chr2R_16152664_16152727_+	0.129731	0.0148982	0.0149273	5.37968	7.1838	0.212997	0.164861	0.8869	0.232826	0.164861	1.18433	0.0542979
B52	CG8929	chr2R_16215640_16215831_+	0.998268	3.1879	0.266091	21.3834	6.58951	1.27189	0.539188	11.5297	0.740108	0.539188	3.55299	0.340737
B52	CG8944	chrX_15638457_15638845_-	0.96662	0.0290442	0.189986	2.10237	3.50926	1.81144	1.68743	3.5476	1.96971	1.68743	5.92165	0.30014
B52	CG8949	chrX_16967645_16968827_-	0.493197	1.4842	0.451276	11.5064	7.6826	1.04853	0.61663	7.0952	0.891342	0.61663	4.73732	0.188168
B52	CG8949	chrX_16969690_16969985_-	0.565612	0.889796	2.44991	16.6207	38.8405	0.435722	0.213445	3.5476	0.751902	0.213445	8.2903	0.201586
B52	CG8949	chrX_16970023_16970957_-	0.259217	3.95559	1.38881	7.71953	4.63875	3.32716	2.29781	17.738	2.85522	2.29781	10.659	0.128586
B52	CG8949	chrX_16971501_16971713_-	0.274569	3.10289	1.12763	5.96455	3.83491	5.34354	4.01477	23.9463	4.77354	4.01477	15.3963	0.135577
B52	CG8963	chr2R_12906431_12906711_-	0.97848	0.582873	0.074133	9.30217	4.96869	0.740569	0.476717	4.4345	0.602846	0.476717	2.36866	0.310069
B52	CG9003	chr2R_7532470_7532914_-	0.320024	0.257334	0.361277	8.87941	11.8572	0.457052	0.299648	2.6607	0.516537	0.299648	3.55299	0.150069
B52	CG9003	chr2R_7538730_7538828_-	0.998438	0.12259	1.08689	1.77656	3.72796	3.67549	3.49457	6.2083	4.13011	3.49457	13.0276	0.34169
B52	CG9018	chr3L_2235973_2236049_-	0.250222	0.215835	0.189986	Inf	Inf	0.0591267	0	0.8869	0.0789553	0	1.18433	0.122257
B52	CG9044	chr2L_5949612_5949827_+	0.561555	0.215835	0.509547	Inf	Inf	0.0591267	0	0.8869	0.157911	0	2.36866	0.200881
B52	CG9044	chr2L_5953058_5953415_+	0.248215	0.350709	0.225316	6.7854	6.79571	0.72448	0.522828	3.5476	0.724839	0.522828	3.55299	0.117747
B52	CG9086	chrX_16854109_16854176_-	0.250222	0.215835	0.189986	Inf	Inf	0.0591267	0	0.8869	0.0789553	0	1.18433	0.122257
B52	CG9086	chrX_16857300_16857735_-	0.127309	4.26749	1.9211	10.9786	7.76139	2.28693	1.37333	15.0773	1.99237	1.37333	10.659	0.0533046
B52	CG9086	chrX_16857754_16861527_-	0.997188	0.661422	0.0524343	2.7713	1.85034	6.44079	5.76055	15.9642	6.08711	5.76055	10.659	0.335799
B52	CG9086	chrX_16861895_16862542_-	0.653834	3.99939	0.928844	5.11454	3.01312	7.51311	5.89586	30.1546	6.68713	5.89586	17.7649	0.218267
B52	CG9125	chrX_16696503_16696589_-	0.268076	0.281136	0.330783	27.0297	36.0943	0.179503	0.0656241	1.7738	0.21916	0.0656241	2.36866	0.132704
B52	CG9149	chr3L_1303094_1303187_+	0.226507	0.551588	0.632624	Inf	Inf	0.118253	0	1.7738	0.157911	0	2.36866	0.101796
B52	CG9153	chr3L_1314336_1314472_+	0.153029	1.65886	1.02044	13.4998	11.2669	0.963553	0.525578	7.0952	0.885316	0.525578	5.92165	0.0649011
B52	CG9281	chrX_15601098_15601161_-	0.22682	0.041982	0.0210804	2.86263	3.82263	0.348292	0.30982	0.8869	0.368121	0.30982	1.18433	0.101951
B52	CG9281	chrX_15603078_15604338_-	0.0790509	2.41045	2.56976	3.02341	3.24429	18.6432	16.4273	49.6664	18.8851	16.4273	53.2948	0.0332164
B52	CG9293	chr2L_13386258_13386487_-	0.346267	0.39004	0.647997	2.84138	3.52324	4.90637	4.36993	12.4166	5.10502	4.36993	15.3963	0.156947
B52	CG9328	chr2L_20810374_20813155_+	0.286919	0.215559	0.104895	4.87341	4.88081	0.915927	0.72795	3.5476	0.916286	0.72795	3.55299	0.139901
B52	CG9384	chr3L_14755497_14756152_+	0.986146	0.350482	0.0341662	4.8222	3.21968	0.923143	0.735682	3.5476	0.844547	0.735682	2.36866	0.317669
B52	CG9391	chr3L_21260636_21260686_-	0.449532	0.148454	0.0429407	5.72525	3.82263	0.407419	0.30982	1.7738	0.368121	0.30982	1.18433	0.179816
B52	CG9391	chr3L_21260821_21260890_-	0.250222	0.215835	0.189986	Inf	Inf	0.0591267	0	0.8869	0.0789553	0	1.18433	0.122257
B52	CG9399	chr3R_5398477_5398970_-	0.588547	1.31836	0.357285	5.30894	3.54467	2.58057	2.00469	10.6428	2.34478	2.00469	7.10598	0.205915
B52	CG9425	chr3L_14783705_14784536_+	0.860965	0.32374	1.22078	1.74162	2.51949	12.826	12.2218	21.2856	13.4598	12.2218	30.7926	0.261192
B52	CG9425	chr3L_14784651_14784970_+	0.983994	0.116646	0.00778464	4.08908	3.64026	0.784685	0.650684	2.6607	0.765215	0.650684	2.36866	0.315226
B52	CG9444	chr3R_5508889_5509369_-	0.262588	0.431268	0.555183	13.0704	17.4537	0.367375	0.203566	2.6607	0.426861	0.203566	3.55299	0.130379
B52	CG9467	chr3R_5626313_5626390_-	0.907365	0.215835	0.0323182	14.234	9.50371	0.234563	0.124618	1.7738	0.195265	0.124618	1.18433	0.274815
B52	CG9485	chr2R_17201485_17201928_+	0.392703	0.311112	0.119373	3.81989	3.06055	1.37914	1.1609	4.4345	1.32037	1.1609	3.55299	0.167095
B52	CG9577	chrX_20060850_20060989_+	0.999999	0.521436	0.0101661	14.5265	6.46604	0.348331	0.183161	2.6607	0.249906	0.183161	1.18433	0.37237
B52	CG9578	chrX_20064792_20064878_+	0.250222	0.215835	0.189986	Inf	Inf	0.0591267	0	0.8869	0.0789553	0	1.18433	0.122257
B52	CG9578	chrX_20065099_20065162_+	0.415105	0.253298	0.0901121	33.7567	22.5387	0.167297	0.0525466	1.7738	0.127999	0.0525466	1.18433	0.171824
B52	CG9588	chr3R_9501850_9502149_-	0.293586	0.166462	0.189986	9.36395	12.5042	0.295053	0.189429	1.7738	0.334711	0.189429	2.36866	0.142019
B52	CG9646	chr2R_12938670_12939326_+	0.00394435	16.0664	14.1708	16.6415	15.0111	32.8782	16.095	267.844	31.1288	16.095	241.603	0.00169801
B52	CG9674	chr3L_16793055_16793171_-	0.880503	0.0946823	0.361902	2.11459	3.22712	3.1541	2.93594	6.2083	3.37185	2.93594	9.47463	0.26652
B52	CG9705	chr3L_16773891_16774562_+	0.0113478	10.466	8.33881	5.78231	5.50021	14.7667	11.1969	64.7437	14.5561	11.1969	61.5851	0.00484541
B52	CG9743	chr3R_26024617_26028528_-	0.328885	0.283073	0.429953	1.68093	1.9121	14.8926	14.2459	23.9463	15.1121	14.2459	27.2396	0.152458
B52	CG9775	chr3R_466059_466737_-	0.32151	0.410057	0.645734	3.55494	4.74711	2.04385	1.74639	6.2083	2.18265	1.74639	8.2903	0.15055
B52	CG9776	chr3R_155971_156723_-	0.999945	1.47819	0.0801427	13.5682	4.52959	0.961081	0.52293	7.0952	0.645979	0.52293	2.36866	0.361708
B52	CG9776	chr3R_156769_157268_-	0.992193	0.556973	0.0515296	9.82193	4.37193	0.860428	0.541787	5.3214	0.663579	0.541787	2.36866	0.326068
B52	CG9776	chr3R_158200_158713_-	0.00160965	21.3385	27.3786	17.0738	23.3626	8.71631	4.20756	71.8389	10.4803	4.20756	98.2993	0.000691686
B52	CG9795	chr3R_147770_148069_+	0.999038	0.215835	0.0107122	3.5124	2.81419	1.47399	1.26253	4.4345	1.41522	1.26253	3.55299	0.34561
B52	CG9795	chr3R_148218_148952_+	0.4474	0.585975	1.30987	3.14286	4.49662	4.51512	3.95073	12.4166	4.87168	3.95073	17.7649	0.179281
B52	CG9836	chr3R_4648792_4648982_-	0.855496	0.665743	0.121753	7.76004	4.44104	1.16059	0.800035	6.2083	0.983565	0.800035	3.55299	0.259698
B52	CG9836	chr3R_4649524_4649706_-	0.174772	1.04661	1.33054	13.5561	18.1023	0.721136	0.392546	5.3214	0.840108	0.392546	7.10598	0.0751042
B52	CG9934	chr2L_13014676_13014925_-	0.712454	0.215835	0.632624	Inf	Inf	0.0591267	0	0.8869	0.157911	0	2.36866	0.228523
B52	CG9934	chr2L_13018178_13018789_-	0.165232	1.12514	1.42748	8.43224	11.2601	1.10106	0.736258	6.2083	1.23986	0.736258	8.2903	0.0704678
B52	CG9945	chr2R_16507741_16507942_+	0.320495	1.26681	0.508292	13.1105	8.75363	0.978118	0.541183	7.0952	0.820926	0.541183	4.73732	0.150235
B52	CG9947	chrX_16333320_16333456_-	0.615232	0.215835	0.551214	4.14515	7.38035	0.77647	0.641882	2.6607	0.914911	0.641882	4.73732	0.210863
B52	CG9947	chrX_16334196_16334249_-	0.357259	0.450751	0.189986	Inf	Inf	0.118253	0	1.7738	0.0789553	0	1.18433	0.159308
B52	CG9947	chrX_16334959_16335174_-	0.614855	3.7773	0.913447	28.5528	12.7094	1.05741	0.372741	10.6428	0.663712	0.372741	4.73732	0.210828
B52	CG9967	chr2L_2309703_2310125_-	0.27064	0.199244	0.189986	8.56917	11.4429	0.311451	0.206998	1.7738	0.351109	0.206998	2.36866	0.133748
B52	CG9977	chr3L_2770492_2771267_-	0.449026	0.431029	0.905578	15.3087	27.2568	0.339597	0.173803	2.6607	0.478038	0.173803	4.73732	0.179714
B52	CG9987	chr2L_19432064_19432123_+	0.250222	0.215835	0.189986	Inf	Inf	0.0591267	0	0.8869	0.0789553	0	1.18433	0.122257
B52	CHOp24	chrX_4435585_4435939_+	0.250222	0.215835	0.189986	Inf	Inf	0.0591267	0	0.8869	0.0789553	0	1.18433	0.122257
B52	CIAPIN1	chr2L_15037986_15038053_-	0.155181	0.025371	0.020467	5.66196	7.56074	0.205326	0.156642	0.8869	0.225154	0.156642	1.18433	0.0660213
B52	CIAPIN1	chr2L_15038551_15038639_-	0.967831	0.215835	0.0232266	12.2406	8.17277	0.253504	0.144912	1.7738	0.214206	0.144912	1.18433	0.301265
B52	CLIP-190	chr2L_17385896_17386145_+	0.254604	0.0911584	0.0901121	16.8784	22.5387	0.10817	0.0525466	0.8869	0.127999	0.0525466	1.18433	0.125641
B52	CLIP-190	chr2L_17402060_17402374_+	0.315702	0.038184	0.0834591	3.26133	4.35504	0.625883	0.543889	1.7738	0.66554	0.543889	2.36866	0.148929
B52	CR12460	chr3L_24527473_24528089_+	0.651129	0.252362	0.663849	2.23036	3.30926	3.87239	3.57884	7.9821	4.1298	3.57884	11.8433	0.217862
B52	CR40190	chr2RHet_337901_338176_+	0.273157	0.42871	0.226391	3.08661	2.88521	3.27309	2.87338	8.869	3.23451	2.87338	8.2903	0.134862
B52	CR42490	chr2L_18665915_18666352_+	0.250222	0.215835	0.189986	3.78897	4.04771	1.38798	1.17037	4.4345	1.40817	1.17037	4.73732	0.122257
B52	CR42491:RpL22	chrX_657268_657473_-	0.30216	0.46461	0.216211	2.75256	2.45044	4.31826	3.86651	10.6428	4.24038	3.86651	9.47463	0.144682
B52	CR42862	chr3L_225606_225725_+	0.110373	3.39914	1.79685	12.1978	8.95865	2.53978	1.4542	17.738	2.22576	1.4542	13.0276	0.0459669
B52	CR43656	chrX_22273114_22273484_-	0.241196	0.350156	0.258262	11.4134	11.4307	0.526612	0.310827	3.5476	0.526971	0.310827	3.55299	0.110846
B52	CR43900+Cam	chr2R_8146964_8147536_+	0.11444	2.2605	3.67219	2.63559	3.42683	14.1817	12.7874	33.7022	14.8562	12.7874	43.8202	0.047768
B52	CR44169	chr2R_2763325_2763410_+	0.618696	0.714822	0.189986	Inf	Inf	0.17738	0	2.6607	0.0789553	0	1.18433	0.211702
B52	CR44206	chr2R_9218460_9224456_-	0.00186732	20.9983	22.6168	4.31859	4.65833	116.122	95.0854	410.635	118.276	95.0854	442.939	0.000826535
B52	CR44357:CG1677	chrX_7178911_7179393_-	0.0849222	2.47946	1.95013	7.22391	6.96692	3.12687	2.20991	15.9642	3.089	2.20991	15.3963	0.0356574
B52	CR44392	chr2L_16889126_16889216_+	0.210004	0.0627832	0.0471886	6.71774	8.97058	0.182349	0.132024	0.8869	0.202177	0.132024	1.18433	0.0925098
B52	CR44917	chr2L_21855432_21864945_+	0.642301	0.741614	0.189986	1.72577	1.47013	31.2492	29.807	51.4402	30.7412	29.807	43.8202	0.216401
B52	CR44993	chr2L_21628587_21628650_+	0.317041	0.23687	0.330783	3.9814	5.3166	0.80111	0.668282	2.6607	0.860596	0.668282	3.55299	0.149295
B52	CR45054	chr3R_5909575_5914782_+	0.522354	0.21395	0.0567449	1.26097	1.21755	93.0261	91.4354	115.297	92.7615	91.4354	111.327	0.193689
B52	CR45334	chr2L_21930695_21930816_+	0.192602	0.040046	0.0293408	2.00032	2.22595	2.83768	2.66027	5.3214	2.8777	2.66027	5.92165	0.0837557
B52	CR45371	chr2L_8343985_8344060_-	0.750046	0.424432	0.0901121	26.8116	11.9344	0.270001	0.099237	2.6607	0.171576	0.099237	1.18433	0.236473
B52	CRMP	chr3R_1396954_1399974_+	0.273289	0.339403	0.417986	2.68857	3.03786	4.77117	4.28841	11.5297	4.87103	4.28841	13.0276	0.134945
B52	CRMP	chr3R_1400712_1400962_+	0.741931	0.0274046	0.00265879	1.76048	2.35087	0.529324	0.503783	0.8869	0.549152	0.503783	1.18433	0.234638
B52	CRMP	chr3R_1401648_1401896_+	0.154142	1.55279	0.981811	8.13012	7.23775	1.44848	0.981794	7.9821	1.39007	0.981794	7.10598	0.065384
B52	CRMP	chr3R_1402136_1402757_+	0.0479458	3.9183	3.23545	8.18189	8.19431	3.20596	2.16796	17.738	3.20776	2.16796	17.7649	0.0201853
B52	CRMP	chr3R_1402982_1403314_+	0.0953793	2.0302	1.8504	10.9005	11.6449	1.35066	0.813631	8.869	1.39103	0.813631	9.47463	0.03974
B52	CSN7	chr2R_4309115_4315083_+	0.190011	2.72724	1.22078	5.3977	3.9527	6.58698	5.09363	27.4939	6.0963	5.09363	20.1336	0.082217
B52	CTCF	chr3L_7349560_7349680_-	0.65978	1.83193	0.455174	11.2353	6.00125	1.32803	0.789388	8.869	1.05258	0.789388	4.73732	0.219083
B52	CYLD	chr2L_10298414_10298780_-	1	0.0111006	0.579905	5.46777	21.9043	0.210518	0.162205	0.8869	0.388257	0.162205	3.55299	0.375205
B52	Ca-P60A	chr2R_19816955_19817022_-	0.249459	0.0930542	0.0901121	10.3858	13.8687	0.138829	0.0853955	0.8869	0.158658	0.0853955	1.18433	0.119047
B52	CaMKII	chr4_1064151_1065781_-	0.40731	0.24467	0.430675	1.69897	1.9558	15.8441	15.1386	25.7201	16.1033	15.1386	29.6082	0.170505
B52	CaMKII	chr4_1071236_1071319_-	0.243565	0.0981105	0.0901121	19.4178	25.9297	0.101756	0.0456746	0.8869	0.121585	0.0456746	1.18433	0.112589
B52	Cad96Ca	chr3R_21028286_21029423_-	0.89972	0.215835	0.891035	Inf	Inf	0.0591267	0	0.8869	0.236866	0	3.55299	0.272407
B52	Cad96Cb	chr3R_21052346_21053566_-	0.396067	1.23714	0.432458	6.91871	4.61948	2.14523	1.53826	10.6428	1.90945	1.53826	7.10598	0.167975
B52	Cad99C	chr3R_25668596_25671320_+	0.114761	1.73132	1.43246	3.26378	3.26874	8.75702	7.60872	24.8332	8.75954	7.60872	24.8709	0.0479139
B52	CalpA	chr2R_15312744_15313538_+	0.496892	0.364897	0.811323	4.97418	7.97078	1.1277	0.891503	4.4345	1.3058	0.891503	7.10598	0.188704
B52	CalpA	chr2R_15316556_15316741_+	0.868579	0.206811	0.686323	6.26978	13.954	0.573458	0.424369	2.6607	0.790854	0.424369	5.92165	0.263539
B52	Cam	chr2R_8156941_8161270_+	0.203816	0.623292	0.604711	1.95405	2.04517	17.8616	16.7935	32.8153	17.9637	16.7935	34.3455	0.0897257
B52	CanB2	chr2R_3673774_3674004_+	0.826402	0.215835	0.761976	2.47866	3.97189	3.93086	3.57814	8.869	4.28706	3.57814	14.212	0.25219
B52	CanB2	chr2R_3674045_3674738_+	0.267706	0.251799	0.272665	1.70474	1.84961	17.4304	16.6482	28.3808	17.5911	16.6482	30.7926	0.132556
B52	Cap-H2	chr3R_6588172_6588750_+	0.317411	0.061938	0.0901121	4.62175	6.17169	0.476461	0.383794	1.7738	0.516118	0.383794	2.36866	0.14935
B52	CapaR	chr3L_21552407_21552894_-	0.448195	0.00646221	0.0321068	4.09186	5.46409	0.522849	0.433495	1.7738	0.562506	0.433495	2.36866	0.179535
B52	Capr	chr3L_18664773_18665730_-	0.252736	0.274833	0.192729	2.18504	2.24447	5.69352	5.27665	11.5297	5.71443	5.27665	11.8433	0.124358
B52	Cas	chr2L_16824500_16824981_-	0.505404	0.385188	0.871448	6.12845	9.82041	0.970986	0.723592	4.4345	1.14908	0.723592	7.10598	0.190561
B52	Cbp20	chr3R_13990772_13990895_+	0.159467	0.0267403	0.0232266	7.61952	10.1748	0.167765	0.116398	0.8869	0.187594	0.116398	1.18433	0.0679401
B52	Cby	chr3R_17693884_17694029_+	0.663252	0.160142	0.403015	4.79724	8.54138	0.695036	0.554631	2.6607	0.833477	0.554631	4.73732	0.219868
B52	Cchl	chr3R_17852789_17852881_-	0.462084	0.267892	0.0901121	17.8744	11.9344	0.210875	0.099237	1.7738	0.171576	0.099237	1.18433	0.181967
B52	Ccm3	chr3R_11197940_11198116_+	0.555922	0.320651	0.0901121	33.7567	22.5387	0.167297	0.0525466	1.7738	0.127999	0.0525466	1.18433	0.199705
B52	Ccm3	chr3R_11198736_11199107_+	0.249459	0.0930542	0.0901121	16.8784	22.5387	0.10817	0.0525466	0.8869	0.127999	0.0525466	1.18433	0.119047
B52	Cct1	chr3L_1546307_1546598_+	0.993925	0.00890637	0.136844	1.64465	2.19619	4.49953	4.31412	7.0952	4.65816	4.31412	9.47463	0.328602
B52	Cct1	chr3L_1547590_1548264_+	0.315604	0.35909	0.539786	2.58699	3.1405	4.17013	3.77115	9.7559	4.30929	3.77115	11.8433	0.148892
B52	Cct5	chr2R_8062634_8063241_+	0.00869216	12.9938	9.19605	15.6819	13.185	6.04325	3.05401	47.8926	5.53489	3.05401	40.2672	0.00368407
B52	Cct5	chr2R_8064224_8064282_+	0.233086	0.0904357	0.0887001	5.96065	7.9596	0.198	0.148793	0.8869	0.217828	0.148793	1.18433	0.105513
B52	Cctgamma	chr3R_12473772_12473856_+	0.964955	0.216781	1.13854	10.5339	35.1662	0.275417	0.16839	1.7738	0.551941	0.16839	5.92165	0.299455
B52	Cdc37	chr3L_1795733_1795792_+	0.24621	0.375273	0.409474	Inf	Inf	0.118253	0	1.7738	0.157911	0	2.36866	0.115418
B52	Cdc37	chr3L_1795997_1796177_+	0.0275508	5.23917	6.06913	208.817	278.846	0.82018	0.0552143	11.5297	1.07795	0.0552143	15.3963	0.0117739
B52	Cdep	chr3R_752054_752508_+	0.244113	0.283733	0.238288	5.71835	6.10884	1.01942	0.775486	4.4345	1.03961	0.775486	4.73732	0.113019
B52	Cdep	chr3R_767663_768023_+	0.268463	0.32374	0.387467	33.7567	45.0773	0.167297	0.0525466	1.7738	0.206954	0.0525466	2.36866	0.132886
B52	Cdk12	chr3L_21513891_21514181_+	0.999794	0.0128609	0.264982	7.20886	19.2528	0.173954	0.123029	0.8869	0.272738	0.123029	2.36866	0.35611
B52	Cdk4	chr2R_12467432_12467610_+	0.772184	0.437965	0.0901121	6.61182	4.41457	1.10594	0.804832	5.3214	0.988042	0.804832	3.55299	0.241052
B52	Cdk4	chr2R_12470875_12471656_+	0.0264623	5.75727	5.26509	13.5166	13.838	3.61103	1.96847	26.607	3.65321	1.96847	27.2396	0.0111767
B52	Cdk9	chr2R_18524705_18524763_-	0.237772	0.0869268	0.0897053	15.4499	20.6311	0.112705	0.057405	0.8869	0.132533	0.057405	1.18433	0.108439
B52	CdsA	chr3L_8121470_8122183_+	0.247975	1.04227	1.83477	2.60043	3.36049	11.7009	10.5728	27.4939	12.2366	10.5728	35.5299	0.117371
B52	Ced-12	chr2L_12098063_12098355_+	0.988121	0.214011	1.20262	5.21307	16.2431	0.653745	0.510391	2.6607	1.02905	0.510391	8.2903	0.31996
B52	CenB1A	chr3R_18944564_18945988_+	0.182482	2.28219	1.10013	5.92404	4.65336	3.38058	2.5451	15.0773	3.16498	2.5451	11.8433	0.0787127
B52	CenB1A	chr3R_18947355_18947528_+	0.999974	0.414576	0.0125384	7.82154	4.17782	0.824796	0.56696	4.4345	0.687073	0.56696	2.36866	0.364555
B52	Cep135	chr3L_15110196_15110573_+	0.57121	0.215835	0.515218	Inf	Inf	0.0591267	0	0.8869	0.157911	0	2.36866	0.202621
B52	Chc	chrX_15727287_15727524_-	0.99933	0.0306822	0.419428	2.97658	7.9496	0.674444	0.595919	1.7738	0.872012	0.595919	4.73732	0.348865
B52	Chc	chrX_15727733_15728155_-	0.297215	0.205427	0.0901121	3.59049	3.59595	1.15869	0.988053	3.5476	1.15905	0.988053	3.55299	0.143168
B52	Chc	chrX_15728405_15728664_-	0.19449	1.44792	2.46534	5.28465	7.64497	2.58917	2.01391	10.6428	2.90607	2.01391	15.3963	0.0847614
B52	Chc	chrX_15728946_15729260_-	0.180047	0.0323347	0.0221604	1.88347	2.09592	2.99172	2.82532	5.3214	3.03174	2.82532	5.92165	0.077514
B52	Chd1	chr2L_2986151_2987386_-	0.00652502	12.5405	11.1949	14.131	14.0726	6.9446	3.70299	52.3271	6.93015	3.70299	52.1105	0.00276755
B52	Chd64	chr3L_4115143_4115304_-	0.797331	0.377407	0.0887001	33.7567	22.5387	0.167297	0.0525466	1.7738	0.127999	0.0525466	1.18433	0.246232
B52	Chmp1	chr3L_18676909_18676979_-	0.586786	0.152065	0.0374849	2.32778	1.55421	0.829465	0.762013	1.7738	0.790167	0.762013	1.18433	0.205414
B52	Chro	chr3L_22867800_22868223_-	0.118281	1.8497	1.35787	15.4463	13.7509	1.35261	0.689021	10.6428	1.27473	0.689021	9.47463	0.0493824
B52	Cht6	chrX_9932172_9932284_+	0.198854	0.0501062	0.0383984	7.76568	10.37	0.16572	0.114208	0.8869	0.185549	0.114208	1.18433	0.0870998
B52	Cip4	chr3L_4327918_4336268_-	0.41028	0.713782	1.58659	16.1199	32.2888	0.44191	0.220075	3.5476	0.679135	0.220075	7.10598	0.170996
B52	Cip4	chr3L_4336320_4338066_-	0.999989	0.0308638	0.728629	4.14675	13.8435	0.517493	0.427757	1.7738	0.794016	0.427757	5.92165	0.367084
B52	Cip4	chr3L_4363128_4363747_-	0.604018	0.480688	0.140042	2.55872	2.08805	6.88748	6.23914	15.9642	6.69171	6.23914	13.0276	0.208965
B52	CkIIalpha-i3	chr3L_708929_708990_-	0.250222	0.215835	0.189986	Inf	Inf	0.0591267	0	0.8869	0.0789553	0	1.18433	0.122257
B52	CkIIbeta	chrX_11687313_11687475_+	0.762915	0.373081	1.21772	7.88749	17.5544	0.492223	0.337332	2.6607	0.709619	0.337332	5.92165	0.239129
B52	CkIIbeta	chrX_11687552_11687830_+	0.421607	0.273527	0.518691	15.0388	26.7762	0.342508	0.176923	2.6607	0.480949	0.176923	4.73732	0.173404
B52	CkIIbeta	chrX_11688199_11688851_+	0.197852	0.765593	0.558758	7.67069	7.31651	1.16928	0.809354	6.2083	1.15017	0.809354	5.92165	0.0865106
B52	CkIIbeta	chrX_11689220_11689633_+	0.990848	0.215835	1.46019	1.458	2.33635	15.6718	15.2074	22.1725	16.5623	15.2074	35.5299	0.323946
B52	Cka	chr2L_8031576_8032059_+	0.113948	1.79846	2.3055	4.66383	5.66171	5.20552	4.18364	19.5118	5.48384	4.18364	23.6866	0.0474576
B52	Cka	chr2L_8036577_8036836_+	0.999929	0.0105988	0.276601	7.87521	21.0324	0.164238	0.112619	0.8869	0.263022	0.112619	2.36866	0.360896
B52	ClC-b	chr2R_8459883_8460005_+	0.131764	0.0135942	0.0157171	6.60808	8.82416	0.184393	0.134214	0.8869	0.204222	0.134214	1.18433	0.0553342
B52	ClC-c	chr3L_16084019_16084615_+	0.167602	0.993933	0.812633	61.7995	61.8933	0.290085	0.057405	3.5476	0.290444	0.057405	3.55299	0.0715838
B52	Clic	chrX_13708019_13708409_-	0.0833302	2.78409	1.98425	8.78735	7.82284	2.75989	1.81672	15.9642	2.64307	1.81672	14.212	0.0348931
B52	Clic	chrX_13708920_13715957_-	0.166531	1.60673	0.935747	2.01513	1.86295	36.6526	34.3294	69.1782	36.3043	34.3294	63.9538	0.0709958
B52	CngA	chr2R_12137301_12141926_-	0.225032	0.0878856	0.0698639	7.20886	9.62641	0.173954	0.123029	0.8869	0.193782	0.123029	1.18433	0.101099
B52	Cnot4	chr2L_10398750_10399316_+	0.45125	0.445808	0.949579	15.3456	27.3225	0.339206	0.173385	2.6607	0.477647	0.173385	4.73732	0.180123
B52	Cnx99A	chr3R_25142088_25142225_-	0.0628725	3.02605	3.78513	Inf	Inf	0.473013	0	7.0952	0.710598	0	10.659	0.0265105
B52	Cnx99A	chr3R_25142352_25142441_-	0.845298	1.51079	0.284193	38.2744	14.6029	0.565278	0.162205	6.2083	0.309302	0.162205	2.36866	0.257052
B52	Cnx99A	chr3R_25143234_25143557_-	0.0688854	2.9239	2.39328	62.1076	58.0551	0.724547	0.142801	8.869	0.685967	0.142801	8.2903	0.0291772
B52	Cnx99A	chr3R_25143863_25143995_-	0.926122	0.249247	1.08825	11.7802	31.4617	0.258789	0.150574	1.7738	0.456357	0.150574	4.73732	0.281801
B52	Cnx99A	chr3R_25144335_25144952_-	0.333931	0.763799	1.48647	3.69187	5.3408	3.4001	2.88276	10.6428	3.717	2.88276	15.3963	0.15366
B52	CoRest	chrX_19419875_19420873_+	0.475765	0.071948	0.149224	2.25165	3.00676	2.13378	1.96944	4.4345	2.23292	1.96944	5.92165	0.184663
B52	CoRest	chrX_19421868_19422394_+	0.368419	0.616088	0.243297	6.7634	5.16089	1.27062	0.917926	6.2083	1.17255	0.917926	4.73732	0.162273
B52	CoVIb:CG18809	chrX_19637740_19638032_-	0.307601	0.592611	0.998636	3.3005	4.40736	3.09929	2.68717	8.869	3.29757	2.68717	11.8433	0.146372
B52	CoVIb:CG18809	chrX_19638082_19638294_-	0.776381	0.79013	0.188595	4.77794	3.19013	1.39425	1.11374	5.3214	1.27636	1.11374	3.55299	0.241698
B52	CoVb	chr2L_6557985_6558417_+	0.931899	2.12711	0.334298	9.87198	4.39421	2.14466	1.3476	13.3035	1.65254	1.3476	5.92165	0.283361
B52	Cont	chr3R_207252_207600_+	0.629831	1.00328	0.257325	6.93547	4.63067	1.7848	1.27879	8.869	1.58831	1.27879	5.92165	0.214207
B52	Corin	chr2R_3428030_3432657_+	0.944865	0.0877831	0.387593	6.85645	18.3116	0.179856	0.129353	0.8869	0.27864	0.129353	2.36866	0.289816
B52	Corin	chr2R_3433765_3442347_+	0.502651	0.0208677	0.0711857	2.68966	3.59166	1.10067	0.989234	2.6607	1.16015	0.989234	3.55299	0.18993
B52	Cortactin	chr3R_16889552_16889619_-	0.462456	0.107447	0.201281	15.0339	40.1512	0.114187	0.0589934	0.8869	0.212971	0.0589934	2.36866	0.182098
B52	Cortactin	chr3R_16889834_16890016_-	0.330135	2.14278	0.775774	8.66292	5.47962	2.93893	1.9452	16.8511	2.52612	1.9452	10.659	0.152742
B52	Cp110	chrX_21887583_21887778_+	0.170434	0.0301294	0.0256685	7.61952	10.1748	0.167765	0.116398	0.8869	0.187594	0.116398	1.18433	0.0730872
B52	Cp190	chr3R_11100513_11100846_-	0.0953452	2.01435	1.88299	3.912	4.13561	6.4974	5.4411	21.2856	6.57851	5.4411	22.5023	0.0396879
B52	Cp1	chr2R_9849842_9852157_+	0.0447086	4.04056	3.50949	2.34842	2.3267	63.7991	58.537	137.47	63.7144	58.537	136.198	0.0187063
B52	Cp1	chr2R_9852992_9853109_+	0.401539	0.104426	0.0336141	3.09973	3.10444	1.3047	1.14449	3.5476	1.30505	1.14449	3.55299	0.169025
B52	Cp1	chr2R_9853291_9854259_+	0.0336163	6.66835	13.3858	4.70412	7.59428	15.7513	12.632	59.4223	18.1852	12.632	95.9307	0.0142229
B52	Cpr	chr2L_6339126_6339824_+	0.802681	0.125092	0.409479	2.35273	3.66536	2.46577	2.2618	5.3214	2.6637	2.2618	8.2903	0.247516
B52	Cpr	chr2L_6341887_6342157_+	0.23715	0.0860529	0.089166	11.5468	15.4191	0.130815	0.0768094	0.8869	0.150644	0.0768094	1.18433	0.108077
B52	Crag	chrX_8492188_8493063_+	0.787878	0.322644	0.0710814	2.48383	1.99008	3.92392	3.57069	8.869	3.80638	3.57069	7.10598	0.244563
B52	Crc	chr3R_5455338_5455429_-	0.973781	0.377792	2.06969	20.7716	83.2125	0.197956	0.0853955	1.7738	0.553434	0.0853955	7.10598	0.305801
B52	Crc	chr3R_5455903_5456170_-	0.00274674	22.12	15.7791	19.521	15.9302	9.13777	4.08897	79.821	8.15891	4.08897	65.1381	0.00119805
B52	Crc	chr3R_5456276_5456399_-	0.087698	2.28629	1.93676	11.776	11.7939	1.55304	0.903768	10.6428	1.55411	0.903768	10.659	0.0367437
B52	CrebB	chrX_18265640_18266063_+	0.197252	0.793623	0.565468	3.16391	3.0983	4.81134	4.20476	13.3035	4.79295	4.20476	13.0276	0.0861765
B52	CrebB	chrX_18266466_18267066_+	0.394429	0.239799	0.0901121	6.57388	5.85233	0.555135	0.404738	2.6607	0.535666	0.404738	2.36866	0.167455
B52	CrebB	chrX_18268130_18269281_+	0.136655	1.37903	1.57906	3.40479	3.97829	4.83595	4.16777	14.1904	4.9953	4.16777	16.5806	0.057453
B52	CrebB	chrX_18269420_18269875_+	0.253509	0.147317	0.0901121	2.73565	2.92246	1.80857	1.621	4.4345	1.82876	1.621	4.73732	0.124908
B52	Crk	chr4_231307_232215_+	0.479856	0.447033	0.99565	5.13309	7.99693	1.32233	1.03669	5.3214	1.52026	1.03669	8.2903	0.185617
B52	Crk	chr4_232609_232740_+	0.164636	0.029036	0.0253416	8.79086	11.7389	0.15329	0.100889	0.8869	0.173118	0.100889	1.18433	0.0702138
B52	Csat	chrX_2596809_2597320_-	0.99941	0.0154779	0.254469	8.23026	21.9807	0.159703	0.107761	0.8869	0.258487	0.107761	2.36866	0.349708
B52	Csk	chr3R_7461353_7461422_-	0.24081	0.119541	0.0901121	15.0339	20.0756	0.114187	0.0589934	0.8869	0.134016	0.0589934	1.18433	0.110431
B52	Csp	chr3L_22260888_22262452_+	0.388842	0.925197	2.04038	3.08805	4.55772	6.2165	5.45688	16.8511	6.75115	5.45688	24.8709	0.166447
B52	Csp	chr3L_22263021_22264013_+	0.583491	1.05978	0.29198	2.67131	2.08084	13.2841	11.9523	31.9284	12.8136	11.9523	24.8709	0.205081
B52	Csp	chr3L_22264077_22264657_+	0.331281	0.743942	1.43409	5.55229	8.65002	1.24928	0.958415	5.3214	1.44721	0.958415	8.2903	0.152952
B52	CtBP	chr3R_8845924_8846575_+	0.388761	0.197171	0.290432	2.95614	3.9475	2.03487	1.80012	5.3214	2.15384	1.80012	7.10598	0.166403
B52	Ctr1A	chrX_6559720_6560272_+	0.410897	0.631555	0.219468	6.6183	5.30268	0.921001	0.670037	4.4345	0.862233	0.670037	3.55299	0.171113
B52	Cul2	chr2L_21658962_21659094_+	0.918972	0.591844	0.0901121	1.82667	1.49682	22.5406	21.3633	39.0236	22.0708	21.3633	31.9769	0.279079
B52	Cul2	chr2L_21659273_21659839_+	0.0904715	2.6473	4.25267	2.59917	3.30554	23.789	21.4972	55.8747	24.8013	21.4972	71.0598	0.0378944
B52	Cul3	chr2L_15270325_15270904_-	0.312924	0.918452	0.398341	8.87388	6.77132	1.06686	0.699615	6.2083	0.968795	0.699615	4.73732	0.147889
B52	Cul4	chr2R_3993445_3993521_-	0.978413	0.215835	0.020467	14.6791	9.80094	0.231036	0.120838	1.7738	0.191738	0.120838	1.18433	0.309973
B52	CycA	chr3L_11823945_11824826_-	0.357554	0.215835	0.0901121	6.33855	5.64283	0.56916	0.419765	2.6607	0.549691	0.419765	2.36866	0.159677
B52	CycA	chr3L_11825347_11825973_-	0.24781	0.341039	0.219468	7.3693	7.38049	0.685816	0.481403	3.5476	0.686175	0.481403	3.55299	0.117137
B52	CycG	chr3R_27425071_27426110_-	0.0947663	2.08837	1.81927	5.0704	5.15871	4.67004	3.67326	18.6249	4.69166	3.67326	18.9493	0.0395491
B52	CycG	chr3R_27435538_27436602_-	0.628947	0.215835	0.0556272	1.49957	1.37265	75.7808	73.3383	109.976	75.1602	73.3383	100.668	0.214065
B52	Cyp1	chrX_16212641_16214111_-	0.241989	0.381669	0.268362	2.0272	2.03028	9.34919	8.74998	17.738	9.35098	8.74998	17.7649	0.111448
B52	Cyp4d1	chrX_2055057_2055613_-	0.613002	0.350156	0.0901121	1.76322	1.5069	13.2148	12.575	22.1725	12.9999	12.575	18.9493	0.210654
B52	Cyp9f3Psi	chr3R_8222988_8223055_-	0.250222	0.215835	0.189986	Inf	Inf	0.0591267	0	0.8869	0.0789553	0	1.18433	0.122257
B52	Cyp9f3Psi	chr3R_8223576_8224391_-	0.99031	0.106189	0.691765	2.16237	3.85005	3.97742	3.69137	7.9821	4.39274	3.69137	14.212	0.323
B52	Cyt-b5	chr2R_3421236_3422513_+	0.0817653	5.62782	2.62274	5.52345	4.09766	11.2856	8.67077	47.8926	10.4614	8.67077	35.5299	0.034215
B52	Cyt-b5	chr2R_3422601_3422836_+	0.99996	0.176585	2.30615	4.36402	17.4826	0.746424	0.60969	2.6607	1.27964	0.60969	10.659	0.362816
B52	DIP2	chr3L_252996_253313_-	0.912425	1.71903	0.283609	17.0614	7.59437	0.968796	0.467845	7.9821	0.673521	0.467845	3.55299	0.276556
B52	DLP	chr2L_6481251_6481982_+	0.560898	0.438024	1.098	11.9213	23.8788	0.257126	0.148793	1.7738	0.375739	0.148793	3.55299	0.200753
B52	DOR	chr3L_4414458_4414664_+	0.438217	0.713164	1.65514	20.1515	47.0916	0.400817	0.176046	3.5476	0.716997	0.176046	8.2903	0.176912
B52	DOR	chr3L_4414859_4417819_+	0.576098	1.26756	0.348209	2.51627	1.88167	9.70237	8.81164	22.1725	9.32957	8.81164	16.5806	0.203534
B52	Dab	chr3L_16709938_16710706_+	0.342701	0.750748	0.317645	8.8162	7.06367	0.765095	0.502995	4.4345	0.706327	0.502995	3.55299	0.155859
B52	Dad	chr3R_12880085_12880618_+	0.649738	0.749318	0.189986	4.32419	3.20797	2.255	1.84592	7.9821	2.11763	1.84592	5.92165	0.217458
B52	Dap160	chr2L_21138362_21138711_-	0.946601	0.215835	1.03425	4.26995	10.2634	1.26494	1.03854	4.4345	1.6799	1.03854	10.659	0.290501
B52	Dcp2	chr3L_15817305_15818570_-	0.338829	0.498904	0.208058	3.05312	2.71801	3.963	3.48587	10.6428	3.88512	3.48587	9.47463	0.154859
B52	Dcr-2	chr2R_13468599_13468719_-	0.450574	0.259801	0.0901121	30.8997	20.6311	0.171831	0.057405	1.7738	0.132533	0.057405	1.18433	0.179944
B52	Deaf1	chr3L_19811767_19812201_+	0.633292	1.14707	3.68385	5.38851	11.6237	2.76568	2.13968	11.5297	3.6551	2.13968	24.8709	0.214636
B52	Deaf1	chr3L_19813111_19821416_+	0.303837	0.369059	0.539906	3.91332	5.22568	1.35327	1.13318	4.4345	1.45241	1.13318	5.92165	0.14532
B52	Dek	chr2R_12743821_12744146_+	0.255199	0.200234	0.117847	2.67412	2.85673	1.84338	1.6583	4.4345	1.86357	1.6583	4.73732	0.12604
B52	Den1	chr2R_8225547_8225804_+	0.995934	0.0944373	0.00420676	4.51732	4.02149	0.727113	0.589	2.6607	0.707644	0.589	2.36866	0.332656
B52	Desat1	chr3R_8269860_8270520_+	0.284296	0.970592	0.444475	6.06937	4.86287	1.95512	1.46127	8.869	1.83759	1.46127	7.10598	0.138999
B52	Desat1	chr3R_8270841_8271699_+	0.428492	0.746968	0.261112	5.89252	4.37146	1.79645	1.35462	7.9821	1.65909	1.35462	5.92165	0.175031
B52	Df31	chr2L_21627758_21627841_-	0.276741	0.341426	0.189986	12.09	10.7629	0.382784	0.220075	2.6607	0.363314	0.220075	2.36866	0.136361
B52	Df31	chr2L_21628210_21628461_-	0.43208	0.534458	0.189986	3.18699	2.55346	3.18862	2.78288	8.869	3.07109	2.78288	7.10598	0.175769
B52	Df31	chr2L_21628977_21629666_-	0.248737	4.85983	1.66797	3.0187	2.18348	32.0009	28.205	85.1424	30.4304	28.205	61.5851	0.118194
B52	Dg	chr2R_11973126_11973549_-	0.616639	0.525019	1.45328	2.83891	4.42279	4.2085	3.7489	10.6428	4.60435	3.7489	16.5806	0.211282
B52	Dg	chr2R_11973799_11974435_-	0.271182	0.97154	1.75313	2.95816	3.9502	6.77908	5.9963	17.738	7.17566	5.9963	23.6866	0.133931
B52	Dg	chr2R_11975231_11975809_-	0.16247	3.12329	1.43036	4.40849	3.41821	7.65373	6.23658	27.4939	7.242	6.23658	21.3179	0.0693365
B52	Dgk	chr2R_3725249_3730517_-	0.874222	0.697049	0.12256	13.3472	7.12932	0.605726	0.332242	4.4345	0.468003	0.332242	2.36866	0.264625
B52	Dgk	chr2R_3738558_3739770_-	0.243818	0.0976281	0.0901121	15.4499	20.6311	0.112705	0.057405	0.8869	0.132533	0.057405	1.18433	0.11272
B52	Dgp-1	chr2R_14058163_14058222_-	0.250222	0.215835	0.189986	Inf	Inf	0.0591267	0	0.8869	0.0789553	0	1.18433	0.122257
B52	Dgp-1	chr2R_14058825_14058897_-	0.942946	1.5006	0.208593	10.9228	5.46969	1.07929	0.649578	7.0952	0.843139	0.649578	3.55299	0.288447
B52	Dgp-1	chr2R_14058976_14059942_-	0.853021	1.60844	0.300656	9.57795	5.116	1.45552	0.925981	8.869	1.18007	0.925981	4.73732	0.258999
B52	Dhap-at	chr3R_21314826_21315923_-	0.964843	0.104132	0.535232	1.37719	1.91899	15.1843	14.8119	20.3987	15.7193	14.8119	28.4239	0.299357
B52	Dhc64C	chr3L_4812256_4812893_-	0.127432	1.64028	2.14144	3.05493	3.65741	9.57261	8.41922	25.7201	9.91078	8.41922	30.7926	0.0533607
B52	Dhc64C	chr3L_4813090_4813327_-	0.240413	0.328189	0.265568	4.58507	4.89816	1.19832	0.967162	4.4345	1.21851	0.967162	4.73732	0.110072
B52	Dhc64C	chr3L_4821467_4821863_-	0.238052	0.565436	0.358394	8.02061	7.14026	0.973995	0.663466	5.3214	0.935056	0.663466	4.73732	0.108572
B52	DhpD	chr3R_54357_54449_-	0.142173	1.24565	1.19707	20.7776	23.1212	0.593799	0.256113	5.3214	0.633815	0.256113	5.92165	0.0599348
B52	Dhpr	chr3L_9127991_9128086_+	0.250222	0.215835	0.189986	Inf	Inf	0.0591267	0	0.8869	0.0789553	0	1.18433	0.122257
B52	Dip-B	chr3R_9608564_9609538_+	0.885217	0.543834	0.0901378	5.43406	3.62821	1.26874	0.979268	5.3214	1.15085	0.979268	3.55299	0.267757
B52	Dlic	chrX_11048699_11049066_+	0.343345	0.215835	0.329484	2.12339	2.63295	6.28548	5.84754	12.4166	6.48413	5.84754	15.3963	0.155958
B52	Dlic	chrX_11049262_11050708_+	0.224965	0.548917	0.38944	3.69478	3.58825	3.11482	2.64046	9.7559	3.09607	2.64046	9.47463	0.101041
B52	Dmtn	chr3R_2218682_2219453_-	0.167869	0.956282	0.861649	4.55783	4.86907	2.40742	1.94588	8.869	2.4478	1.94588	9.47463	0.0717403
B52	Doa	chr3R_24714257_24714742_+	0.290502	0.36278	0.189986	13.8406	12.3215	0.356802	0.192238	2.6607	0.337333	0.192238	2.36866	0.140895
B52	Doa	chr3R_24715081_24715487_+	0.985739	0.636938	0.075984	7.44063	3.97436	0.851886	0.595985	4.4345	0.714163	0.595985	2.36866	0.31743
B52	Doa	chr3R_24715823_24717613_+	0.227025	0.445808	0.428051	2.65515	2.95464	4.45066	4.00837	10.6428	4.5307	4.00837	11.8433	0.102125
B52	Doa	chr3R_24717714_24718923_+	0.333374	3.52104	1.14833	6.03829	3.90159	6.08264	4.55326	27.4939	5.43404	4.55326	17.7649	0.153545
B52	Doa	chr3R_24728529_24729199_+	0.999364	0.353881	0.0178652	3.02277	2.01824	2.66378	2.34725	7.0952	2.50659	2.34725	4.73732	0.349265
B52	Doa	chr3R_24729298_24731360_+	0.204373	1.10157	1.71871	2.97477	3.79182	7.42261	6.55909	19.5118	7.77988	6.55909	24.8709	0.089941
B52	Doa	chr3R_24733060_24733411_+	0.382744	0.0953842	0.175187	3.41701	4.56293	1.20551	1.03822	3.5476	1.28483	1.03822	4.73732	0.165191
B52	Doa	chr3R_24736900_24738608_+	0.329637	1.24955	0.495089	3.39213	2.71783	6.06308	5.22916	17.738	5.82801	5.22916	14.212	0.15259
B52	Doa	chr3R_24738890_24740661_+	0.968784	0.615728	0.0897053	2.85277	1.90474	6.28724	5.59603	15.9642	5.93356	5.59603	10.659	0.301998
B52	Doa	chr3R_24743942_24745213_+	0.265177	0.411765	0.52909	3.29667	3.9131	2.79199	2.42126	7.9821	2.89149	2.42126	9.47463	0.131515
B52	Doa	chr3R_24746992_24747062_+	0.250222	0.215835	0.189986	Inf	Inf	0.0591267	0	0.8869	0.0789553	0	1.18433	0.122257
B52	Dop1R1	chr3R_10006175_10017460_-	0.950066	0.146606	0.0146122	4.04276	3.59902	0.791644	0.65814	2.6607	0.772175	0.65814	2.36866	0.291967
B52	Dp1	chr2R_14302093_14302333_+	0.453862	0.556973	0.189986	Inf	Inf	0.118253	0	1.7738	0.0789553	0	1.18433	0.180715
B52	Dp1	chr2R_14302439_14302703_+	0.362746	0.219247	0.0901121	6.73313	5.99409	0.546201	0.395166	2.6607	0.526732	0.395166	2.36866	0.160935
B52	Dp	chr2R_9110618_9111095_+	0.999994	0.611744	0.0172887	3.65491	2.16916	2.57048	2.18394	7.9821	2.35416	2.18394	4.73732	0.368633
B52	Dp	chr2R_9111968_9112826_+	0.46493	0.0357968	0.0901121	1.34676	1.48104	22.9081	22.3904	30.1546	23.1085	22.3904	33.1612	0.182627
B52	Dpit47	chr2R_2548747_2548803_-	0.24092	0.107228	0.0901121	16.8784	22.5387	0.10817	0.0525466	0.8869	0.127999	0.0525466	1.18433	0.110544
B52	Drat	chr2R_3414578_3414644_-	0.249332	0.0931143	0.0901121	16.0629	21.4497	0.11066	0.0552143	0.8869	0.130489	0.0552143	1.18433	0.118621
B52	Drep-1	chr2R_7932414_7935480_+	0.743543	0.215835	0.042877	3.02239	2.69065	1.99804	1.76066	5.3214	1.9591	1.76066	4.73732	0.235095
B52	Drep-2	chr2R_5183288_5184770_+	0.250927	0.092958	0.0901121	15.4499	20.6311	0.112705	0.057405	0.8869	0.132533	0.057405	1.18433	0.122966
B52	Droj2	chr3R_9207981_9208543_+	0.515534	1.28626	0.38441	4.37191	3.14357	3.23006	2.63722	11.5297	3.0141	2.63722	8.2903	0.192329
B52	Drp1	chr2L_2584402_2585169_-	0.121126	1.58889	1.82968	8.63697	10.4849	1.70464	1.12955	9.7559	1.8438	1.12955	11.8433	0.0505819
B52	Dscam1	chr2R_3210838_3211323_-	0.649021	0.217069	0.573362	10.7594	21.5514	0.272124	0.164861	1.7738	0.390736	0.164861	3.55299	0.217348
B52	Dscam1	chr2R_3211474_3212074_-	0.380677	0.475353	0.189986	6.26758	5.02168	0.955994	0.707529	4.4345	0.897227	0.707529	3.55299	0.164601
B52	Dscam1	chr2R_3212243_3213400_-	0.260703	0.0566462	0.0844831	1.80548	2.41097	3.62323	3.43858	6.2083	3.76203	3.43858	8.2903	0.129327
B52	Dscam1	chr2R_3214290_3216793_-	0.491041	0.281136	0.0901121	2.16173	1.92446	6.63072	6.1541	13.3035	6.53338	6.1541	11.8433	0.187468
B52	Dscam1	chr2R_3222724_3223220_-	0.511161	0.0953842	0.0235498	2.77831	2.78253	1.42827	1.27689	3.5476	1.42863	1.27689	3.55299	0.191746
B52	Dscam1	chr2R_3233672_3233773_-	0.300967	0.068637	0.0901121	5.26188	7.0265	0.432883	0.337104	1.7738	0.472541	0.337104	2.36866	0.144293
B52	Dscam1	chr2R_3235203_3235353_-	0.626686	0.37444	0.0976915	11.0883	7.40339	0.535119	0.319942	3.5476	0.456523	0.319942	2.36866	0.213498
B52	Dscam1	chr2R_3246233_3246311_-	0.250927	0.092958	0.0901121	8.58788	11.4679	0.155515	0.103273	0.8869	0.175344	0.103273	1.18433	0.122966
B52	Dscam1	chr2R_3251271_3251385_-	0.271986	0.197266	0.189986	5.54018	7.39812	0.417079	0.32017	1.7738	0.456736	0.32017	2.36866	0.13423
B52	Dscam1	chr2R_3252988_3253447_-	0.312014	1.85836	0.711071	5.82487	4.14842	3.01855	2.28391	13.3035	2.76329	2.28391	9.47463	0.147726
B52	Dscam1	chr2R_3253610_3253970_-	0.354623	0.215835	0.0906679	3.6585	3.66406	1.14155	0.969686	3.5476	1.14191	0.969686	3.55299	0.158696
B52	Dscam1	chr2R_3254133_3254309_-	0.221537	0.53138	0.399057	11.8351	11.853	0.516277	0.299754	3.5476	0.516636	0.299754	3.55299	0.099046
B52	Dscam1	chr2R_3254472_3255892_-	0.00966641	11.2418	8.81671	8.23605	7.57976	11.8128	7.9687	65.6306	11.4642	7.9687	60.4008	0.00411025
B52	Dscam2	chr3L_7156979_7157347_-	0.250222	0.215835	0.189986	Inf	Inf	0.0591267	0	0.8869	0.0789553	0	1.18433	0.122257
B52	Dsor1	chrX_9141942_9142574_+	0.537038	0.0533667	0.134967	1.87096	2.27127	5.51716	5.21439	9.7559	5.65632	5.21439	11.8433	0.196406
B52	Dsp1	chrX_16230777_16230883_+	0.250927	0.092958	0.0901121	15.0339	20.0756	0.114187	0.0589934	0.8869	0.134016	0.0589934	1.18433	0.122966
B52	Duox	chr2L_2827996_2830125_-	0.282268	0.350709	0.189986	8.82213	7.8538	0.458868	0.301594	2.6607	0.439398	0.301594	2.36866	0.138356
B52	Dyrk3	chr4_1231226_1232378_-	0.230354	0.0904545	0.0844831	2.31041	2.57102	2.50444	2.30323	5.3214	2.54446	2.30323	5.92165	0.103917
B52	Dys	chr3R_15289404_15290221_+	0.657627	0.215835	0.579616	2.65463	4.05129	2.59665	2.33867	6.2083	2.8144	2.33867	9.47463	0.218748
B52	Dys	chr3R_15311714_15312810_+	0.554679	0.215835	0.504909	6.42002	11.4307	0.564189	0.414438	2.6607	0.70263	0.414438	4.73732	0.199484
B52	Dys	chr3R_15384287_15385869_+	0.255982	0.0904419	0.0901121	11.5468	15.4191	0.130815	0.0768094	0.8869	0.150644	0.0768094	1.18433	0.126388
B52	E(Pc)	chr2R_7340391_7340897_+	0.932317	1.7236	0.266671	4.00874	2.40889	5.31238	4.42484	17.738	4.84045	4.42484	10.659	0.283557
B52	E(Pc)	chr2R_7342793_7343092_+	0.266039	0.156052	0.173458	7.4412	9.93666	0.340737	0.238376	1.7738	0.380395	0.238376	2.36866	0.131812
B52	E(bx)	chr3L_234653_234981_-	0.999998	0.0146803	0.532121	2.39008	5.58532	1.62186	1.4843	3.5476	1.93804	1.4843	8.2903	0.370922
B52	E(bx)	chr3L_236907_238322_-	0.540537	0.372139	0.883798	2.22294	2.96842	7.76709	7.18158	15.9642	8.12401	7.18158	21.3179	0.196866
B52	E(bx)	chr3L_245476_245927_-	0.361981	0.455672	0.189986	6.66925	5.3435	0.916223	0.664918	4.4345	0.857456	0.664918	3.55299	0.160624
B52	E(z)	chr3L_10629194_10629525_-	0.737983	1.99098	0.447224	108.149	41.2622	0.467465	0.057405	6.2083	0.211489	0.057405	2.36866	0.233975
B52	E(z)	chr3L_10629541_10629723_-	0.206632	0.671622	0.501838	Inf	Inf	0.17738	0	2.6607	0.157911	0	2.36866	0.0910567
B52	E2f	chr3R_17450015_17450886_-	0.617899	1.53562	0.399923	12.0956	7.17862	1.14807	0.65992	7.9821	0.931746	0.65992	4.73732	0.211422
B52	EF2	chr2L_21679403_21679483_-	0.972738	0.373386	2.03404	27.0297	108.283	0.179503	0.0656241	1.7738	0.534981	0.0656241	7.10598	0.304681
B52	EF2	chr2L_21681559_21682038_-	0.0177281	7.15347	7.10459	5.80614	6.15702	13.7153	10.3871	60.3092	13.9582	10.3871	63.9538	0.00754092
B52	ERp60	chr2R_7776194_7776453_-	0.0431678	4.10595	3.63933	31.0751	31.9203	1.11494	0.371027	11.5297	1.13584	0.371027	11.8433	0.0180953
B52	ERp60	chr2R_7776895_7778175_-	0.00151899	22.2777	24.5397	6.17292	7.17033	28.2107	20.9767	129.487	29.6056	20.9767	150.41	0.000657413
B52	Eb1	chr2R_2637090_2639148_+	0.213974	0.555671	0.554166	1.73548	1.84036	18.2273	17.3753	30.1546	18.3488	17.3753	31.9769	0.0946152
B52	Eb1	chr2R_2639737_2640136_+	0.216601	0.72948	0.479222	4.7873	4.56625	1.62426	1.29683	6.2083	1.60515	1.29683	5.92165	0.0961625
B52	Eb1	chr2R_2640494_2640731_+	0.0171216	8.33293	6.71931	12.2314	11.7396	4.05768	2.32032	28.3808	3.9816	2.32032	27.2396	0.00738277
B52	Eb1	chr2R_2641009_2641684_+	0.000912289	32.5109	27.3102	14.1987	13.5431	14.7956	7.87038	111.749	14.4517	7.87038	106.59	0.000414718
B52	Eb1	chr2R_2641944_2642206_+	0.0754507	3.60106	2.23844	12.1158	9.88713	2.29407	1.31763	15.9642	2.0983	1.31763	13.0276	0.0316749
B52	Ect4	chr3L_8091826_8092245_+	0.924276	0.0698568	0.297637	4.40325	8.81986	0.494237	0.402839	1.7738	0.612849	0.402839	3.55299	0.280876
B52	Ect4	chr3L_8092637_8094118_+	0.101274	2.18457	3.0718	3.10397	3.80884	12.0549	10.572	32.8153	12.5517	10.572	40.2672	0.0421431
B52	Ect4	chr3L_8094168_8094787_+	0.985021	0.457774	0.0450385	2.76756	1.84784	5.7316	5.1274	14.1904	5.41721	5.1274	9.47463	0.316569
B52	Edem1	chrX_1802155_1802271_-	0.209597	0.0619995	0.0467312	6.71774	8.97058	0.182349	0.132024	0.8869	0.202177	0.132024	1.18433	0.0923327
B52	Ef1alpha100E	chr3R_27564252_27565381_+	0.997383	0.0207357	0.226821	5.03788	13.4547	0.223437	0.176046	0.8869	0.322221	0.176046	2.36866	0.33681
B52	Ef1alpha48D	chr2R_7779690_7780627_+	0.00109265	26.2163	28.0727	4.7077	5.1169	80.8264	64.8073	305.094	82.5943	64.8073	331.612	0.000486686
B52	Ef1alpha48D	chr2R_7780701_7781046_+	0.00468459	14.4918	13.3062	4.45094	4.55825	32.5988	26.5018	117.958	32.7884	26.5018	120.802	0.00197737
B52	Ef1gamma	chr3R_25045927_25045985_+	0.15159	1.11783	1.104	3.64355	4.05453	3.43579	2.921	10.6428	3.51582	2.921	11.8433	0.0642445
B52	Ef1gamma	chr3R_25046031_25046151_+	0.118828	1.69018	1.35926	5.90769	5.91667	2.39093	1.80152	10.6428	2.39201	1.80152	10.659	0.0496401
B52	Efa6	chr3R_18414141_18424940_+	0.243947	0.429294	0.492626	1.66586	1.76283	29.4696	28.217	47.0057	29.652	28.217	49.7418	0.112776
B52	Efa6	chr3R_18427389_18427917_+	0.675964	0.889469	2.77542	4.79989	9.61436	1.85267	1.4782	7.0952	2.32712	1.4782	14.212	0.221569
B52	Efa6	chr3R_18428158_18428566_+	0.218672	1.6951	3.4559	9.97429	17.759	1.27906	0.800268	7.9821	1.69438	0.800268	14.212	0.097431
B52	Efa6	chr3R_18431293_18431539_+	0.285532	0.355695	0.189986	3.83061	3.65374	1.92655	1.62071	6.2083	1.90744	1.62071	5.92165	0.139458
B52	Ehbp1	chr2R_12896448_12897005_-	0.00748354	10.893	13.3379	7.42898	9.23143	12.2797	8.59564	63.8568	13.3126	8.59564	79.3501	0.00315499
B52	Ehbp1	chr2R_12898041_12898391_-	0.99946	1.42305	0.0901121	5.82691	2.59367	3.01781	2.28311	13.3035	2.52568	2.28311	5.92165	0.350194
B52	Ehbp1	chr2R_12898482_12898658_-	0.0950125	2.01316	2.14835	19.4127	23.0426	0.915907	0.411178	7.9821	1.01541	0.411178	9.47463	0.0396011
B52	Ehbp1	chr2R_12900280_12900789_-	0.125703	3.54633	1.73437	13.761	9.72837	2.02777	1.09566	15.0773	1.73321	1.09566	10.659	0.0526315
B52	Eip63E	chr3L_3552865_3578288_+	0.224932	0.455672	0.429953	1.30661	1.32428	192.558	188.701	246.558	192.78	188.701	249.893	0.100964
B52	Eip63E	chr3L_3593547_3593822_+	0.986632	0.215835	0.0182286	17.2081	11.4895	0.214461	0.10308	1.7738	0.175163	0.10308	1.18433	0.318004
B52	Eip63E	chr3L_3594743_3598064_+	0.0885456	2.56983	1.86452	4.35371	4.11809	5.98217	4.88907	21.2856	5.90537	4.88907	20.1336	0.0370471
B52	Eip63E	chr3L_3598622_3600012_+	0.393023	0.158776	0.244556	3.15235	4.20951	1.60858	1.40673	4.4345	1.70772	1.40673	5.92165	0.167162
B52	Eip63E	chr3L_3600492_3607501_+	0.992562	0.513948	0.0437414	2.12583	1.60451	10.3158	9.59562	20.3987	9.98233	9.59562	15.3963	0.326773
B52	Eip71CD	chr3L_15505183_15505271_+	0.251784	0.0926761	0.0901121	15.4499	20.6311	0.112705	0.057405	0.8869	0.132533	0.057405	1.18433	0.123756
B52	Elf	chr2L_12435424_12436689_+	0.993072	0.788326	0.086282	3.39737	1.74488	3.93612	3.39372	11.5297	3.56225	3.39372	5.92165	0.327383
B52	Elf	chr2L_12436979_12437812_+	0.207372	0.879001	0.550946	7.26628	6.46872	1.55742	1.09851	7.9821	1.49901	1.09851	7.10598	0.0914096
B52	EloB	chr3R_16404515_16404635_-	0.946665	0.215835	1.03431	Inf	Inf	0.0591267	0	0.8869	0.236866	0	3.55299	0.290549
B52	EloB	chr3R_16404955_16405175_-	0.941908	0.54486	0.0897109	31.1574	13.8687	0.257083	0.0853955	2.6607	0.158658	0.0853955	1.18433	0.288007
B52	EloC	chr2R_15332885_15333432_-	0.20015	0.647099	0.611289	4.55698	4.86817	2.40776	1.94624	8.869	2.44814	1.94624	9.47463	0.0878246
B52	EndoB	chr2R_15196319_15196531_-	0.999408	0.00991944	0.198718	2.05652	4.11929	0.923277	0.862525	1.7738	1.04189	0.862525	3.55299	0.349663
B52	EndoGI	chr2L_16258180_16258248_+	0.167416	0.0295525	0.0263879	9.70889	12.9648	0.144386	0.0913493	0.8869	0.164215	0.0913493	1.18433	0.0714663
B52	Ent1	chr2L_357192_357328_-	0.250222	0.215835	0.189986	Inf	Inf	0.0591267	0	0.8869	0.0789553	0	1.18433	0.122257
B52	Eps-15	chr2R_20658848_20659247_-	0.773988	5.20987	1.04645	12.4472	5.54047	2.63822	1.49632	18.6249	1.94925	1.49632	8.2903	0.241224
B52	Eps-15	chr2R_20660527_20660734_-	0.159159	1.04227	0.934997	20.2264	21.6076	0.50026	0.219243	4.4345	0.520448	0.219243	4.73732	0.0678044
B52	Ets21C	chr2L_548219_549025_-	0.0914016	2.12587	1.92539	14.0626	14.4451	1.53387	0.819884	11.5297	1.55478	0.819884	11.8433	0.0381841
B52	Ets21C	chr2L_549503_551157_-	0.046625	9.02814	4.18317	10.6324	6.66877	9.04073	5.50539	58.5354	7.58598	5.50539	36.7142	0.0195512
B52	Ets96B	chr3R_20620365_20621844_+	1	0.911505	0.00906879	26.4323	8.82416	0.361773	0.134214	3.5476	0.204222	0.134214	1.18433	0.379633
B52	Evi5	chrX_11328848_11329415_-	0.174996	0.881396	0.820123	5.45721	5.82986	2.10811	1.62519	8.869	2.14849	1.62519	9.47463	0.0752217
B52	Evi5	chrX_11330430_11330807_-	0.393462	0.00709	0.033016	3.29072	4.39428	0.62135	0.539032	1.7738	0.661007	0.539032	2.36866	0.16732
B52	Evi5	chrX_11330826_11331055_-	0.122512	1.60847	1.31772	Inf	Inf	0.236507	0	3.5476	0.236866	0	3.55299	0.0511016
B52	Exn	chr3L_16979821_16983601_+	0.0298148	5.37089	4.73508	4.45665	4.55839	11.5087	9.35328	41.6843	11.5721	9.35328	42.6359	0.0126253
B52	FK506-bp1	chr3R_11158551_11158734_-	0.302446	0.927096	0.409474	60.1355	40.1512	0.291567	0.0589934	3.5476	0.212971	0.0589934	2.36866	0.144895
B52	FK506-bp2	chr2R_15177731_15177890_+	0.853599	0.293824	1.10813	2.8083	4.68761	2.83109	2.52651	7.0952	3.14763	2.52651	11.8433	0.259093
B52	FKBP59	chr2L_9888547_9888666_+	0.250222	0.215835	0.189986	Inf	Inf	0.0591267	0	0.8869	0.0789553	0	1.18433	0.122257
B52	Fas1	chr3R_12455321_12457330_+	0.526456	0.100256	0.0253416	2.76246	2.76666	1.43511	1.28422	3.5476	1.43547	1.28422	3.55299	0.194317
B52	Fas1	chr3R_12462299_12462496_+	0.249459	0.0930542	0.0901121	10.3858	13.8687	0.138829	0.0853955	0.8869	0.158658	0.0853955	1.18433	0.119047
B52	FeCH	chr3R_27637201_27637462_-	0.100017	3.82597	1.99305	15.1795	10.7312	1.9322	0.993267	15.0773	1.63765	0.993267	10.659	0.0416843
B52	Fem-1	chr2R_16552969_16553049_-	0.242282	0.10115	0.0901121	9.68436	12.9321	0.144602	0.0915807	0.8869	0.164431	0.0915807	1.18433	0.11171
B52	Fer1HCH	chr3R_26212319_26212439_-	0.125475	2.17498	3.67947	8.87742	14.2254	1.52372	0.999052	8.869	1.87991	0.999052	14.212	0.0525196
B52	Fer1HCH	chr3R_26212551_26212605_-	0.251639	0.0927495	0.0901121	1.67427	2.23575	1.66061	1.58917	2.6607	1.72009	1.58917	3.55299	0.123638
B52	Fhos	chr3L_8782618_8783269_+	0.745345	0.127783	0.380812	8.00843	16.0412	0.324979	0.221492	1.7738	0.443591	0.221492	3.55299	0.235262
B52	Fim	chrX_17181568_17181959_-	0.416952	0.0953597	0.188897	3.39118	4.52845	1.21289	1.04612	3.5476	1.2922	1.04612	4.73732	0.172276
B52	Fkbp14	chr2R_17375351_17375511_-	0.190729	1.09981	0.6777	14.7118	12.2785	0.92314	0.482279	7.0952	0.844903	0.482279	5.92165	0.0826911
B52	Fkbp14	chr2R_17375867_17382635_-	1	0.00496704	0.479222	1.2736	1.74323	28.363	27.855	35.476	29.2351	27.855	48.5575	0.37842
B52	Fkbp14	chr2R_17383030_17384137_-	0.199957	1.13374	0.661875	2.05043	1.92246	21.7532	20.3296	41.6843	21.5798	20.3296	39.0829	0.0877266
B52	Fkbp14	chr2R_17384280_17384568_-	0.987157	0.066476	0.424417	1.26677	1.69159	19.9522	19.6036	24.8332	20.5074	19.6036	33.1612	0.318768
B52	Flo1	chr2R_11454097_11454307_-	0.301331	0.758552	0.351555	11.4128	9.14411	0.658285	0.388555	4.4345	0.599517	0.388555	3.55299	0.144399
B52	Flo1	chr2R_11455346_11455656_-	0.997037	0.944562	0.089166	54.0594	18.0472	0.297756	0.0656241	3.5476	0.140204	0.0656241	1.18433	0.335338
B52	Flo2	chrX_14776620_14779984_+	0.357554	0.215835	0.0901121	5.82334	5.18416	0.603823	0.456903	2.6607	0.584353	0.456903	2.36866	0.159677
B52	Fmr1	chr3R_5931836_5933151_-	0.0922454	2.30571	1.80663	10.3243	9.84763	1.95025	1.20265	12.4166	1.91203	1.20265	11.8433	0.0384068
B52	Fmr1	chr3R_5933202_5933951_-	0.0071118	15.6699	10.2991	24.0928	18.1619	5.79603	2.28233	54.9878	4.89361	2.28233	41.4515	0.00300076
B52	Fmr1	chr3R_5934065_5934416_-	0.0277873	6.90512	4.79647	15.4378	12.8844	3.60789	1.8384	28.3808	3.29494	1.8384	23.6866	0.0119051
B52	Fmr1	chr3R_5934946_5935537_-	0.574596	1.1411	3.42682	4.22601	8.24781	3.31503	2.72827	11.5297	4.04654	2.72827	22.5023	0.203305
B52	Fs(2)Ket	chr2L_20735431_20736102_+	0.999542	0.0301294	0.431101	2.03261	4.52377	1.39912	1.30901	2.6607	1.61652	1.30901	5.92165	0.35121
B52	Fs	chr2R_11112301_11114442_-	0.306406	0.156052	0.189986	3.96925	5.30037	0.803019	0.670328	2.6607	0.862505	0.670328	3.55299	0.146068
B52	FucTB	chr2L_9430430_9430696_-	0.145249	4.36854	1.8504	22.052	13.0877	1.73995	0.723936	15.9642	1.30732	0.723936	9.47463	0.0612414
B52	Fur2	chrX_16267868_16268573_+	0.322303	0.450751	0.735901	4.42547	5.90959	1.72322	1.40286	6.2083	1.86202	1.40286	8.2903	0.150829
B52	Fur2	chrX_16268794_16268958_+	0.654081	0.363889	1.00666	13.9678	31.0866	0.355169	0.190489	2.6607	0.572566	0.190489	5.92165	0.218415
B52	GABA-B-R2	chr3R_17597970_17598381_-	0.183367	1.02846	0.690439	Inf	Inf	0.17738	0	2.6607	0.157911	0	2.36866	0.0791655
B52	GABA-B-R2	chr3R_17601070_17601462_-	0.999999	1.21157	0.0332542	10.6593	3.55849	1.09427	0.665637	7.0952	0.779171	0.665637	2.36866	0.371709
B52	GEFmeso	chr2R_14444490_14445307_-	0.982336	0.405642	2.37764	30.8997	123.787	0.171831	0.057405	1.7738	0.52731	0.057405	7.10598	0.313495
B52	GEFmeso	chr2R_14446179_14446773_-	0.812443	0.213807	0.0336141	10.9355	7.30144	0.269645	0.162205	1.7738	0.230347	0.162205	1.18433	0.249434
B52	Gad1	chr3L_4075941_4076798_-	0.998714	1.37659	0.102538	8.90041	3.56557	1.52131	0.996471	8.869	1.16691	0.996471	3.55299	0.343453
B52	GalNAc-T2	chrX_18391536_18391977_-	0.14915	0.0217141	0.0201653	7.50524	10.0222	0.169419	0.118171	0.8869	0.189248	0.118171	1.18433	0.0631669
B52	Gale	chr3L_649052_649178_+	0.999955	3.8123	0.198246	10.8007	3.43399	2.85112	1.72442	18.6249	2.00424	1.72442	5.92165	0.36239
B52	Gale	chr3L_649420_650232_+	0.121955	3.10095	1.64307	2.83302	2.44071	21.7815	19.4096	54.9878	21.2738	19.4096	47.3732	0.0508972
B52	Galphaq	chr2R_8506056_8506285_+	0.932872	0.708825	0.111238	8.52105	4.87656	1.0939	0.728584	6.2083	0.916878	0.728584	3.55299	0.283752
B52	Galphas	chr2R_19830338_19831499_+	0.0533419	3.37086	3.27362	6.15323	6.63662	5.03499	3.74753	23.0594	5.15575	3.74753	24.8709	0.0222556
B52	Galphas	chr2R_19832604_19833218_+	0.245396	1.50691	0.686424	7.09774	4.73901	3.51503	2.49911	17.738	3.12205	2.49911	11.8433	0.114261
B52	Galphas	chr2R_19833785_19833960_+	0.244588	1.32583	0.622326	25.8073	17.231	0.547211	0.206198	5.3214	0.429317	0.206198	3.55299	0.113539
B52	Galt	chr2L_6667531_6667670_-	0.238582	0.454428	0.516209	Inf	Inf	0.118253	0	1.7738	0.157911	0	2.36866	0.108953
B52	Gbeta13F	chrX_15754356_15754777_+	0.17153	1.20451	1.68319	2.76208	3.36764	8.25282	7.38526	20.3987	8.55097	7.38526	24.8709	0.0735366
B52	Gbeta76C	chr3L_19682459_19682651_+	0.11304	0.00679791	0.0122736	7.72494	10.3156	0.166283	0.11481	0.8869	0.186111	0.11481	1.18433	0.0470927
B52	Gdh	chr3R_19762742_19763144_-	0.218512	0.535358	0.414841	14.1586	14.1801	0.470364	0.250561	3.5476	0.470723	0.250561	3.55299	0.0972946
B52	Gdh	chr3R_19764493_19768315_-	0.1549	1.15193	1.33487	1.60662	1.67809	116.02	111.51	179.154	116.551	111.51	187.124	0.0658476
B52	Gdi	chr2L_9493104_9494221_-	0.080154	2.52179	3.31748	9.37501	12.519	1.91649	1.22983	11.5297	2.17426	1.22983	15.3963	0.0336239
B52	Gel	chr3R_62933_63346_+	0.16765	1.57481	0.923061	8.97439	7.49001	1.21091	0.790606	7.0952	1.13268	0.790606	5.92165	0.0716033
B52	Gel	chr3R_63540_64024_+	0.132802	1.89491	1.22465	6.01058	5.35085	2.95269	2.21335	13.3035	2.85535	2.21335	11.8433	0.0558426
B52	Gel	chr3R_64100_64291_+	0.31969	0.257129	0.117931	6.39953	5.69711	0.565427	0.415765	2.6607	0.545958	0.415765	2.36866	0.15005
B52	Gga	chrX_9495445_9496113_+	0.364635	0.223581	0.363125	4.8277	6.44671	0.922359	0.734842	3.5476	1.00167	0.734842	4.73732	0.161288
B52	Gint3+CG42306	chr2R_14546362_14546424_-	0.373284	0.468618	0.189986	Inf	Inf	0.118253	0	1.7738	0.0789553	0	1.18433	0.163268
B52	Gint3+CG42306	chr2R_14547630_14547699_-	1	0.00934813	1.22656	4.74894	31.7077	0.233434	0.186758	0.8869	0.569084	0.186758	5.92165	0.381963
B52	Girdin	chr3L_3183800_3183932_+	0.879332	0.186297	0.649297	8.56917	22.8858	0.311451	0.206998	1.7738	0.509019	0.206998	4.73732	0.266235
B52	Girdin	chr3L_3184038_3184248_+	0.60002	0.202277	0.43193	5.13346	9.14	0.661132	0.518306	2.6607	0.799573	0.518306	4.73732	0.208214
B52	GlcAT-P	chr3L_11172817_11175254_-	0.983896	0.193485	1.04335	4.06606	10.8593	0.788123	0.654368	2.6607	1.08448	0.654368	7.10598	0.31513
B52	Glg1	chr3L_21494028_21494520_-	0.297834	0.372628	0.189986	Inf	Inf	0.118253	0	1.7738	0.0789553	0	1.18433	0.14336
B52	Glt	chr2L_8672784_8673124_+	0.987476	0.953595	0.101616	2.66622	1.64324	9.60944	8.64873	23.0594	9.01961	8.64873	14.212	0.31915
B52	Glut1	chr3L_915810_950946_+	0.240496	0.341426	0.259765	2.01263	2.04257	11.7604	11.0167	22.1725	11.7824	11.0167	22.5023	0.110204
B52	Glut4EF	chr3R_5755449_5756085_+	0.92584	0.793486	0.118548	6.62978	3.7942	1.28788	0.936426	6.2083	1.11086	0.936426	3.55299	0.281558
B52	GlyS	chr3R_10971194_10972422_-	0.234783	0.377792	0.348925	2.0007	2.1092	8.98451	8.42261	16.8511	9.04543	8.42261	17.7649	0.106663
B52	Gmap	chrX_15401627_15403750_+	0.119662	9.06355	3.09945	28.1869	14.1148	2.12386	0.75516	21.2856	1.41541	0.75516	10.659	0.050045
B52	Golgin245	chr2R_19259384_19259445_-	0.146223	0.0184618	0.0196803	9.70889	12.9648	0.144386	0.0913493	0.8869	0.164215	0.0913493	1.18433	0.0616263
B52	Golgin245	chr2R_19264143_19264353_-	0.436399	0.0382861	0.0901121	2.76085	3.68673	1.07686	0.963724	2.6607	1.13634	0.963724	3.55299	0.176438
B52	Gp150	chr2R_18210531_18212622_+	0.472006	0.164755	0.303507	2.44436	3.26409	3.57996	3.26552	7.9821	3.75842	3.26552	10.659	0.183962
B52	Gp210	chr2R_1654084_1654195_+	0.960048	0.0858654	0.404545	8.93719	23.8687	0.151748	0.099237	0.8869	0.250532	0.099237	2.36866	0.29691
B52	Gp210	chr2R_1655359_1655418_+	0.250222	0.215835	0.189986	Inf	Inf	0.0591267	0	0.8869	0.0789553	0	1.18433	0.122257
B52	Gp210	chr2R_1655566_1656847_+	0.124395	1.73395	2.37524	3.45395	4.25747	7.76845	6.67624	23.0594	8.12608	6.67624	28.4239	0.0519222
B52	Gp93	chr3R_23774796_23774892_+	0.124107	1.49218	1.42521	23.1846	25.7998	0.568981	0.229523	5.3214	0.608998	0.229523	5.92165	0.0518289
B52	Gpo-1	chr2R_11746399_11746584_-	0.257111	0.384664	0.227512	23.6256	21.0324	0.282491	0.112619	2.6607	0.263022	0.112619	2.36866	0.127249
B52	Gpo-1	chr2R_11748259_11748565_-	0.177525	0.861246	0.754984	6.87938	7.14501	1.61508	1.16029	7.9821	1.63563	1.16029	8.2903	0.0764544
B52	Gpo-1	chr2R_11748850_11749143_-	0.218963	0.734112	0.475004	3.1638	2.98222	5.45302	4.76557	15.0773	5.39533	4.76557	14.212	0.0975869
B52	Gpo-1	chr2R_11749224_11749386_-	0.425434	0.176251	0.0581082	2.50915	2.39329	2.7232	2.47427	6.2083	2.70409	2.47427	5.92165	0.174226
B52	Gpo-1	chr2R_11749526_11750187_-	0.999644	1.211	0.0844846	2.86014	1.75052	8.36505	7.44216	21.2856	7.81452	7.44216	13.0276	0.353231
B52	Gprk2	chr3R_27259611_27279032_+	0.00602675	12.4931	12.1901	3.46838	3.52813	101.248	86.9415	301.546	101.595	86.9415	306.741	0.00251851
B52	Gprk2	chr3R_27280487_27280928_+	0.326801	0.686737	1.28233	4.85079	7.19726	2.06797	1.64553	7.9821	2.32538	1.64553	11.8433	0.152061
B52	Graf	chrX_15652351_15654157_-	0.90439	0.0923842	0.36428	1.51336	2.02088	10.9099	10.5488	15.9642	11.2668	10.5488	21.3179	0.274043
B52	Gs1l	chr2L_4455739_4455856_-	0.491041	0.281136	0.0901121	32.1258	21.4497	0.169787	0.0552143	1.7738	0.130489	0.0552143	1.18433	0.187468
B52	Gs1l	chr2L_4456521_4456723_-	0.282268	0.350709	0.189986	12.2212	10.8798	0.380578	0.217712	2.6607	0.361109	0.217712	2.36866	0.138356
B52	GstD1	chr3R_8194316_8194924_-	0.0102737	10.8821	8.65248	10.0447	9.3414	7.92599	4.94453	49.6664	7.69415	4.94453	46.1888	0.00437642
B52	GstT1	chr2R_5493888_5493951_+	0.175111	0.0314925	0.0294243	9.70889	12.9648	0.144386	0.0913493	0.8869	0.164215	0.0913493	1.18433	0.0753001
B52	GstT3	chrX_20339440_20339573_+	0.87051	0.52473	0.0901121	45.1017	20.0756	0.232441	0.0589934	2.6607	0.134016	0.0589934	1.18433	0.263916
B52	Gyc76C:CG42637+Gyc76C	chr3L_19784142_19784547_-	0.496344	0.0101378	0.0415429	3.07106	4.10097	0.657333	0.577585	1.7738	0.69699	0.577585	2.36866	0.188591
B52	HDAC4	chrX_13162874_13163860_-	0.973263	0.187215	0.930689	1.62287	2.42716	14.2299	13.6626	22.1725	14.9625	13.6626	33.1612	0.305119
B52	HDAC6	chrX_15233126_15233659_+	0.926883	0.0890826	0.368105	16.8784	45.0773	0.10817	0.0525466	0.8869	0.206954	0.0525466	2.36866	0.281947
B52	HERC2	chrX_20267810_20269149_+	0.498636	0.51385	1.2061	14.5654	29.175	0.463833	0.243564	3.5476	0.701058	0.243564	7.10598	0.188931
B52	HGTX	chr3L_14583298_14588989_-	0.0615547	3.01796	2.84977	2.13934	2.18866	55.3111	51.4064	109.976	55.4801	51.4064	112.511	0.0259184
B52	HGTX	chr3L_14589176_14590885_-	0.51237	0.609832	0.189986	2.20326	1.82133	9.13143	8.45333	18.6249	8.91619	8.45333	15.3963	0.192066
B52	HLH106	chr3L_19787800_19787998_+	0.887029	0.225161	0.898653	3.94448	8.77882	0.806949	0.674538	2.6607	1.02435	0.674538	5.92165	0.268282
B52	HLH106	chr3L_19791007_19791232_+	0.0374558	4.33767	5.43464	12.4562	16.6334	2.26047	1.28163	15.9642	2.61738	1.28163	21.3179	0.0158426
B52	HLH106	chr3L_19791401_19791473_+	0.877292	0.532568	0.0901121	61.7995	20.6311	0.290085	0.057405	3.5476	0.132533	0.057405	1.18433	0.265666
B52	HSPC300	chr2R_19915648_19916136_-	0.976266	0.0897072	0.479222	1.55129	2.14825	16.0037	15.4364	23.9463	16.618	15.4364	33.1612	0.307793
B52	Hcs	chr3R_1301523_1302027_+	0.125004	0.0147732	0.0130999	4.13634	5.52349	0.259249	0.214417	0.8869	0.279078	0.214417	1.18433	0.0522211
B52	Hel25E	chr2L_5541657_5541722_-	0.302069	0.378671	0.189986	Inf	Inf	0.118253	0	1.7738	0.0789553	0	1.18433	0.144629
B52	Hel89B	chr3R_11799547_11802286_+	0.241087	0.326537	0.288998	1.80228	1.87187	13.9973	13.2867	23.9463	14.0589	13.2867	24.8709	0.110714
B52	Hers	chrX_19760421_19760825_+	0.999671	2.05025	0.134792	6.1432	2.59054	3.68358	2.74305	16.8511	3.03391	2.74305	7.10598	0.353538
B52	Hers	chrX_19787991_19793044_+	0.0376369	4.43978	6.18028	2.62655	3.15665	37.4283	33.7667	88.69	38.6216	33.7667	106.59	0.0159083
B52	Hers	chrX_19794006_19794648_+	0.345351	1.05864	0.419027	6.55385	4.86207	1.66887	1.21793	7.9821	1.53151	1.21793	5.92165	0.156649
B52	Hexo1	chr3L_4289881_4289960_+	0.243355	0.0986259	0.0901121	16.0629	21.4497	0.11066	0.0552143	0.8869	0.130489	0.0552143	1.18433	0.112477
B52	Hil	chr2R_16497182_16500569_-	0.227025	0.445808	0.428051	2.41158	2.57625	6.03565	5.51652	13.3035	6.09621	5.51652	14.212	0.102125
B52	Hil	chr2R_16502439_16505571_-	0.0432578	3.9885	3.78999	5.06421	5.33884	8.45813	6.65498	33.7022	8.57997	6.65498	35.5299	0.0181367
B52	His2Av	chr3R_22692818_22693130_+	0.0360688	4.41284	5.21992	4.57895	5.38661	10.076	8.13501	37.2498	10.514	8.13501	43.8202	0.0153343
B52	His2Av	chr3R_22693209_22693390_+	0.269155	0.838295	0.413471	4.72645	4.01641	2.57689	2.06411	9.7559	2.47919	2.06411	8.2903	0.133151
B52	His2Av	chr3R_22693505_22694077_+	0.663295	1.00387	0.242014	6.91783	4.61889	1.43028	1.02564	7.0952	1.27309	1.02564	4.73732	0.219905
B52	Hk	chrX_10135770_10136842_-	0.0891343	2.3563	1.86452	2.94655	2.92292	11.902	10.5349	31.0415	11.8854	10.5349	30.7926	0.0373007
B52	Hk	chrX_10148341_10148752_-	0.192131	2.02163	0.981536	5.28174	4.31018	3.8853	3.02252	15.9642	3.68953	3.02252	13.0276	0.0834998
B52	Hk	chrX_10149206_10149525_-	0.286157	1.09716	0.492626	3.38933	2.90955	4.24698	3.66344	12.4166	4.1298	3.66344	10.659	0.139662
B52	HmgD	chr2R_17600940_17601640_+	0.412228	0.192994	0.065975	2.30252	2.19621	2.93044	2.6963	6.2083	2.91133	2.6963	5.92165	0.171255
B52	HmgD	chr2R_17601672_17602910_+	0.573206	0.928063	2.57585	2.64371	4.14426	8.56147	7.71595	20.3987	9.33335	7.71595	31.9769	0.203207
B52	HmgZ	chr2R_17585810_17585892_-	0.559923	0.215835	0.509036	Inf	Inf	0.0591267	0	0.8869	0.236866	0	3.55299	0.200625
B52	Hmt4-20	chrX_548130_548897_-	0.385092	0.152476	0.225025	2.81022	3.75264	1.76843	1.57799	4.4345	1.86757	1.57799	5.92165	0.165761
B52	Hop	chr2L_296812_296976_+	0.977501	1.57209	0.191247	10.973	5.32833	1.4802	0.889081	9.7559	1.14563	0.889081	4.73732	0.30915
B52	Hr39	chr2L_21237421_21238280_+	0.999943	0.621094	0.025581	1.89253	1.38589	15.392	14.5276	27.4939	14.9013	14.5276	20.1336	0.361622
B52	Hr46	chr2R_6111530_6114827_-	0.746472	0.355283	0.089166	30.0678	20.0756	0.173314	0.0589934	1.7738	0.134016	0.0589934	1.18433	0.235679
B52	Hr78	chr3L_21488969_21489492_-	0.0204611	12.1793	6.6801	17.6552	12.3005	4.87657	2.31079	40.7974	4.05167	2.31079	28.4239	0.00860115
B52	Hr96	chr3R_20852947_20853969_+	0.2082	0.871991	1.18922	7.11333	9.49885	1.22847	0.87277	6.2083	1.36727	0.87277	8.2903	0.0917235
B52	Hrb27C	chr2L_6924401_6924684_+	0.251639	0.0927495	0.0901121	16.0629	21.4497	0.11066	0.0552143	0.8869	0.130489	0.0552143	1.18433	0.123638
B52	Hrb87F	chr3R_9484020_9484183_-	1	1.12776	0.0190319	3.71901	1.82966	5.3524	4.53107	16.8511	4.78168	4.53107	8.2903	0.376593
B52	Hrb87F	chr3R_9484287_9484358_-	0.245847	0.0953842	0.0901121	9.68436	12.9321	0.144602	0.0915807	0.8869	0.164431	0.0915807	1.18433	0.114703
B52	Hrb87F	chr3R_9485371_9486061_-	0.441489	0.276361	0.100103	2.62419	2.33615	3.3711	3.04174	7.9821	3.31269	3.04174	7.10598	0.177865
B52	Hrs	chr2L_2740212_2740388_+	0.17004	0.943415	0.820123	6.55368	6.80673	1.6689	1.21796	7.9821	1.68945	1.21796	8.2903	0.072931
B52	Hrs	chr2L_2740785_2740994_+	0.168547	1.19696	1.64207	8.58241	11.4606	1.40019	0.930053	7.9821	1.57865	0.930053	10.659	0.0722478
B52	Hsc70-3	chrX_11698492_11698929_-	0.141099	1.31984	1.08487	6.43794	6.44771	2.25245	1.65314	10.6428	2.25353	1.65314	10.659	0.059284
B52	Hsc70-4	chr3R_11068693_11068877_+	0.0460715	3.75344	4.27361	5.34996	6.25109	6.84326	5.30487	28.3808	7.16196	5.30487	33.1612	0.0192403
B52	Hsc70-4	chr3R_11069017_11069940_+	0.00654753	11.6062	15.5501	4.16794	5.31498	28.6082	23.6198	98.4459	30.4144	23.6198	125.539	0.00278409
B52	Hsc70Cb	chr3L_14030851_14032147_+	0.00554105	19.2788	11.8214	15.9613	11.9567	9.10101	4.55638	72.7258	7.88457	4.55638	54.4791	0.00228714
B52	Hsc70Cb	chr3L_14033695_14034526_+	0.0223806	8.67703	5.6324	14.9643	12.4031	3.31885	1.71876	25.7201	3.02537	1.71876	21.3179	0.00947608
B52	Hsc70Cb	chr3L_14034623_14035258_+	0.057438	3.16113	3.23068	16.3101	19.3598	0.988911	0.489398	7.9821	1.08841	0.489398	9.47463	0.0240304
B52	Hsc70Cb	chr3L_14035460_14035547_+	0.249397	0.353881	0.383417	Inf	Inf	0.118253	0	1.7738	0.157911	0	2.36866	0.118763
B52	Hsf	chr2R_14021614_14021911_-	0.0132037	8.39083	9.13104	20.1185	24.0862	2.90787	1.27843	25.7201	3.24604	1.27843	30.7926	0.00564404
B52	Hsp60	chrX_11002667_11003835_+	0.0904877	2.53591	1.83483	3.5445	3.38084	8.19459	7.00612	24.8332	8.11815	7.00612	23.6866	0.0379114
B52	Hsp60	chrX_11003959_11004073_+	0.318465	1.28555	0.514669	13.465	8.9903	0.964821	0.526937	7.0952	0.807629	0.526937	4.73732	0.149571
B52	Hsp83	chr3L_3193368_3194498_+	0.00220958	21.3589	18.7843	3.54792	3.42682	180.727	154.486	548.104	179.48	154.486	529.395	0.000972124
B52	Hus1-like	chr3R_634997_636393_-	0.976342	0.336044	0.0370773	2.24544	1.79908	6.41659	5.92467	13.3035	6.24029	5.92467	10.659	0.307841
B52	Hydr2	chr2L_3164075_3166527_+	0.0792885	3.56759	2.16763	5.0811	4.37748	6.8832	5.41101	27.4939	6.62938	5.41101	23.6866	0.0333142
B52	IP3K1	chr2L_9783064_9786245_+	0.309796	0.282247	0.406569	2.65413	3.18979	3.71008	3.34159	8.869	3.82941	3.34159	10.659	0.146984
B52	IP3K1	chr2L_9786803_9787149_+	0.414419	0.154755	0.0498139	5.86788	5.22381	0.600586	0.453435	2.6607	0.581117	0.453435	2.36866	0.17161
B52	Ide	chr3L_20367373_20367461_-	0.250222	0.215835	0.189986	Inf	Inf	0.0591267	0	0.8869	0.0789553	0	1.18433	0.122257
B52	Ide	chr3L_20368655_20368717_-	0.284512	0.353881	0.189986	9.13753	8.13458	0.449152	0.291184	2.6607	0.429682	0.291184	2.36866	0.139084
B52	ImpL2	chr3L_4225951_4226573_-	0.0392633	4.25811	4.07707	2.30851	2.37807	58.4782	53.7862	124.166	58.7277	53.7862	127.908	0.0166726
B52	ImpL3	chr3L_6253011_6253080_-	0.260305	0.370185	0.444475	16.8154	22.4545	0.325062	0.15823	2.6607	0.384548	0.15823	3.55299	0.128997
B52	ImpL3	chr3L_6253537_6253604_-	0.24322	0.0987632	0.0901121	11.5468	15.4191	0.130815	0.0768094	0.8869	0.150644	0.0768094	1.18433	0.112347
B52	ImpL3	chr3L_6254261_6255658_-	0.00430811	22.2777	13.3403	7.37302	5.72719	26.2238	18.4044	135.696	24.2044	18.4044	105.405	0.00184103
B52	Incenp	chr2R_3167832_3167975_+	0.272468	0.332697	0.189986	17.3201	15.4191	0.320758	0.153619	2.6607	0.301288	0.153619	2.36866	0.134413
B52	Ino80	chr3R_15195136_15196726_-	0.466437	0.568094	0.189986	Inf	Inf	0.118253	0	1.7738	0.0789553	0	1.18433	0.182919
B52	Ino80	chr3R_15202948_15207261_-	0.305277	0.115863	0.0494514	3.28429	3.28928	1.24467	1.08017	3.5476	1.24503	1.08017	3.55299	0.1458
B52	Inos	chr2R_3342737_3342806_-	0.353296	0.446096	0.189986	Inf	Inf	0.118253	0	1.7738	0.0789553	0	1.18433	0.158473
B52	Inos	chr2R_3343275_3343338_-	0.272684	0.229011	0.255706	30.0678	40.1512	0.173314	0.0589934	1.7738	0.212971	0.0589934	2.36866	0.134529
B52	Inos	chr2R_3343582_3343653_-	0.250222	0.215835	0.189986	Inf	Inf	0.0591267	0	0.8869	0.0789553	0	1.18433	0.122257
B52	Inos	chr2R_3344353_3346113_-	0.00545829	17.689	11.7294	5.08241	4.32257	37.2955	29.3166	148.999	35.8104	29.3166	126.723	0.00222929
B52	Inr-a	chr2R_10753581_10754117_-	0.608325	0.215835	0.0590234	2.40354	2.13973	3.63172	3.32097	7.9821	3.57331	3.32097	7.10598	0.209927
B52	Inr-a	chr2R_10756538_10757150_-	0.28799	0.353881	0.479222	1.77243	2.10385	9.47076	9.00694	15.9642	9.66976	9.00694	18.9493	0.140277
B52	Int6	chr3L_16779750_16779843_-	0.99965	0.386162	0.0181766	14.5265	6.46604	0.348331	0.183161	2.6607	0.249906	0.183161	1.18433	0.353319
B52	IntS11	chr3R_25571406_25571484_+	0.419443	0.256391	0.0901121	23.0935	15.4191	0.189942	0.0768094	1.7738	0.150644	0.0768094	1.18433	0.172803
B52	IntS11	chr3R_25572460_25572514_+	0.240486	0.117454	0.0901121	1.17448	1.56836	0.763925	0.755141	0.8869	0.783753	0.755141	1.18433	0.110185
B52	Ip259	chr2L_10408622_10408738_+	0.0687479	3.89636	2.42175	31.047	23.3206	1.37262	0.457062	14.1904	1.13719	0.457062	10.659	0.0290842
B52	Ipk1	chr2R_16759511_16760044_+	0.0685008	4.25811	2.50584	16.8899	13.2671	1.83832	0.892681	15.0773	1.62272	0.892681	11.8433	0.0289291
B52	Ipk1	chr2R_16760198_16761155_+	0.0747431	2.50149	2.64041	17.0081	20.1884	0.970163	0.46931	7.9821	1.06967	0.46931	9.47463	0.0313701
B52	Ipk1	chr2R_16761257_16762199_+	0.344651	4.49305	1.38075	43.414	20.7048	1.09471	0.286004	12.4166	0.661714	0.286004	5.92165	0.156471
B52	Ipk1	chr2R_16762502_16762742_+	0.179843	1.1277	0.736632	Inf	Inf	0.17738	0	2.6607	0.157911	0	2.36866	0.0773959
B52	Ipk1	chr2R_16764127_16764759_+	0.31899	2.3692	0.852409	30.3546	18.0152	0.777571	0.262962	7.9821	0.561252	0.262962	4.73732	0.149866
B52	Ir41a	chr2R_805585_837181_+	6.26229e-05	95.8949	92.0947	10.0775	10.0341	178.28	111.066	1119.27	177.959	111.066	1114.45	6.26229e-05
B52	Irc	chr3R_12828874_12829925_+	0.134969	1.35189	1.39698	3.45343	3.84297	5.37881	4.62271	15.9642	5.49886	4.62271	17.7649	0.0565991
B52	Irc	chr3R_12830023_12830189_+	0.830101	1.72519	0.339819	29.2547	13.0218	0.524533	0.181899	5.3214	0.327683	0.181899	2.36866	0.253328
B52	Irp-1B	chr3R_6237521_6238341_-	0.323137	0.946169	0.398294	17.9516	11.9859	0.631428	0.29643	5.3214	0.513534	0.29643	3.55299	0.151108
B52	Jafrac1	chrX_13224064_13224431_+	0.146136	1.24702	1.38881	2.49149	2.73991	13.3065	12.103	30.1546	13.5069	12.103	33.1612	0.061607
B52	Jafrac1	chrX_13224713_13225051_+	0.705893	0.965125	3.15907	3.40526	6.25246	4.83541	4.1672	14.1904	5.6264	4.1672	26.0552	0.226844
B52	Jheh2	chr2R_14744597_14744708_-	0.958938	0.0860231	0.402529	16.8784	45.0773	0.10817	0.0525466	0.8869	0.206954	0.0525466	2.36866	0.296323
B52	Jupiter	chr3R_7417030_7417222_-	0.126652	1.65886	1.24603	17.7831	16.962	0.739724	0.349112	6.2083	0.720614	0.349112	5.92165	0.0530428
B52	Jupiter	chr3R_7417967_7418088_-	0.999448	0.101816	1.07054	4.11298	13.7307	0.520771	0.431269	1.7738	0.797294	0.431269	5.92165	0.350062
B52	Jupiter	chr3R_7418347_7419043_-	0.0109027	10.5633	8.51849	13.9703	13.2551	4.4984	2.41241	33.7022	4.38338	2.41241	31.9769	0.00457661
B52	Jupiter	chr3R_7419077_7419354_-	0.119444	2.88786	1.59822	11.913	9.09037	1.80056	1.04227	12.4166	1.60443	1.04227	9.47463	0.0499529
B52	KCNQ	chr2R_6036946_6038360_-	0.444138	0.215835	0.417684	2.83957	3.79184	2.80513	2.49869	7.0952	2.96376	2.49869	9.47463	0.178622
B52	KP78a+KP78b	chr3R_7176885_7178734_-	0.0832885	4.68866	2.39077	2.43627	2.06042	71.8015	65.5272	159.642	70.1596	65.5272	135.014	0.0348267
B52	Kah	chr3L_585466_588962_-	0.135977	1.54012	2.01773	3.54427	4.30261	6.43894	5.50516	19.5118	6.71726	5.50516	23.6866	0.0570732
B52	Kal1	chr3R_19967383_19970914_+	0.549224	0.373081	0.899723	4.83683	8.07362	0.921066	0.733456	3.5476	1.07934	0.733456	5.92165	0.198446
B52	Kap-alpha1	chr3L_19800420_19801012_+	0.998273	0.0318975	0.377115	3.79951	8.45618	0.83097	0.700275	2.6607	1.04837	0.700275	5.92165	0.340783
B52	Kap-alpha3	chr3R_5403196_5403329_-	0.294263	0.219139	0.276234	13.4355	17.9412	0.241475	0.132024	1.7738	0.281133	0.132024	2.36866	0.1424
B52	Kap3	chrX_11232858_11233246_-	0.291509	0.871991	1.59822	5.26179	7.72901	2.16444	1.68555	8.869	2.44169	1.68555	13.0276	0.141274
B52	Karl	chrX_11683137_11684828_+	0.16097	1.61538	0.964348	2.47229	2.26381	13.7881	12.5558	31.0415	13.6136	12.5558	28.4239	0.0687539
B52	Karybeta3	chr3R_475490_476306_+	0.0373221	7.04097	4.09272	11.6368	8.87963	4.55912	2.66752	31.0415	4.06879	2.66752	23.6866	0.0157902
B52	Karybeta3	chr3R_479059_479173_+	0.997453	0.341426	0.0230926	16.4033	7.30144	0.328771	0.162205	2.6607	0.230347	0.162205	1.18433	0.337177
B52	Kat60	chr3R_1054559_1055428_-	0.268325	0.395892	0.509112	1.90679	2.16431	9.86492	9.30255	17.738	10.0246	9.30255	20.1336	0.13282
B52	Kat60	chr3R_1055551_1055743_-	0.264871	0.333449	0.390742	13.7129	18.3116	0.238982	0.129353	1.7738	0.27864	0.129353	2.36866	0.131334
B52	Kat60	chr3R_1056348_1056714_-	0.467056	0.00667153	0.0332916	4.07466	5.44113	0.524557	0.435325	1.7738	0.564214	0.435325	2.36866	0.183052
B52	Kat60	chr3R_1057036_1057778_-	0.0820699	3.00727	2.02692	3.22513	2.95558	16.1053	14.0248	45.2319	15.8533	14.0248	41.4515	0.0344294
B52	Kdm4B+CG17724	chr2R_9066519_9067092_-	1	0.021441	0.841686	1.43934	2.72289	7.61078	7.39421	10.6428	8.2435	7.39421	20.1336	0.37496
B52	Keap1	chr3R_12902616_12903539_-	0.466996	0.105845	0.199003	2.04624	2.73246	3.24562	3.034	6.2083	3.38442	3.034	8.2903	0.182998
B52	Khc-73	chr2R_11407985_11409346_-	0.110563	1.69714	1.65697	5.13107	5.5671	3.52724	2.76558	14.1904	3.60763	2.76558	15.3963	0.0460755
B52	Khc-73	chr2R_11409971_11410378_-	0.322161	0.730889	1.37851	15.0156	25.064	0.457017	0.236261	3.5476	0.615287	0.236261	5.92165	0.150792
B52	Khc-73	chr2R_11412243_11412364_-	0.533602	0.215835	0.490348	Inf	Inf	0.0591267	0	0.8869	0.157911	0	2.36866	0.195736
B52	Khc-73	chr2R_11418901_11419626_-	0.98015	0.040046	0.287278	1.64092	2.43468	5.07225	4.86441	7.9821	5.32966	4.86441	11.8433	0.311615
B52	Khc	chr2R_12157759_12158843_-	0.0232079	6.12967	6.03097	7.86222	8.59	5.42558	3.72257	29.2677	5.60619	3.72257	31.9769	0.00993209
B52	Klc	chr3L_12741999_12742809_-	0.361635	0.0923842	0.148518	4.59617	6.13753	0.717683	0.578896	2.6607	0.777168	0.578896	3.55299	0.160521
B52	Klp3A	chrX_2493752_2493811_-	0.419585	0.215835	0.398901	Inf	Inf	0.0591267	0	0.8869	0.157911	0	2.36866	0.172851
B52	Klp98A	chr3R_23381314_23384047_-	0.947918	0.0589691	0.293266	2.36212	3.78513	2.04782	1.87734	4.4345	2.22592	1.87734	7.10598	0.291136
B52	Kr-h2	chr2L_6071188_6072212_+	0.804298	0.325791	1.10907	6.51557	13.0509	0.744689	0.544481	3.5476	0.981914	0.544481	7.10598	0.247871
B52	KrT95D	chr3R_19826503_19828143_-	0.0686525	2.98059	4.11514	2.88745	3.4569	20.0568	17.8151	51.4402	20.7331	17.8151	61.5851	0.0290067
B52	KrT95D	chr3R_19832301_19838704_-	0.0245074	5.67851	6.89877	2.80628	3.1796	46.7411	41.7175	117.071	47.7793	41.7175	132.645	0.0104937
B52	LIMK1	chrX_12484518_12485963_-	0.900171	0.369059	0.0617728	3.23376	2.39902	2.83595	2.46836	7.9821	2.69858	2.46836	5.92165	0.272647
B52	LKR	chr2L_7794769_7795509_-	0.999988	0.58942	0.0178731	2.8222	1.77348	5.99139	5.34239	15.0773	5.61788	5.34239	9.47463	0.366748
B52	Lac	chr2R_8341560_8351844_+	0.284979	0.503166	0.757454	1.84834	2.06523	24.8417	23.5119	43.4581	25.1816	23.5119	48.5575	0.139169
B52	LanA	chr3L_6208820_6210202_-	0.134263	1.54012	1.99212	6.05165	7.54237	2.93867	2.19833	13.3035	3.15715	2.19833	16.5806	0.0563338
B52	LanB2	chr3L_9608073_9609059_+	0.588345	2.41223	0.625648	7.52122	4.46379	3.04533	2.12255	15.9642	2.61269	2.12255	9.47463	0.205848
B52	LanB2	chr3L_9609214_9610153_+	0.0268461	5.79269	5.13858	6.06279	6.16838	8.21772	6.144	37.2498	8.26097	6.144	37.8985	0.011428
B52	Lar	chr2L_19702035_19702326_+	0.257544	0.145041	0.147358	7.06635	9.43611	0.352539	0.251021	1.7738	0.392196	0.251021	2.36866	0.127514
B52	Lar	chr2L_19702351_19714888_+	0.564526	0.32089	0.765931	4.03611	6.28793	1.58531	1.31845	5.3214	1.78324	1.31845	8.2903	0.201361
B52	Lasp+CG43954	chr3L_16673033_16673911_-	0.0313769	7.48132	4.52337	5.7494	4.86866	8.3272	6.32465	36.3629	7.95584	6.32465	30.7926	0.0132895
B52	Lasp+CG43954	chr3L_16674048_16674337_-	0.28754	0.141699	0.186556	4.91884	6.56842	0.454826	0.360613	1.7738	0.494483	0.360613	2.36866	0.14014
B52	Letm1	chr2R_20400695_20402058_-	0.360419	0.669766	1.33383	4.0351	5.92713	2.6427	2.19797	8.869	2.91994	2.19797	13.0276	0.160252
B52	Lint-1	chrX_11044238_11044668_+	0.328544	1.32499	2.93668	8.74575	16.0582	1.2302	0.811275	7.0952	1.6257	0.811275	13.0276	0.152401
B52	Liprin-alpha	chr2L_6724394_6724826_+	0.165336	1.10695	0.82193	9.58403	8.95868	1.45497	0.925394	8.869	1.41639	0.925394	8.2903	0.0705069
B52	Liprin-alpha	chr2L_6725260_6725775_+	0.871378	0.0914362	0.327856	19.4178	51.8594	0.101756	0.0456746	0.8869	0.20054	0.0456746	2.36866	0.264105
B52	Liprin-alpha	chr2L_6726719_6727193_+	0.153921	1.69714	1.02744	10.5891	8.48417	1.37299	0.837557	8.869	1.25545	0.837557	7.10598	0.0653067
B52	Liprin-alpha	chr2L_6727335_6727862_+	0.083823	3.16217	2.01796	11.6918	9.75793	2.07882	1.21371	14.1904	1.92235	1.21371	11.8433	0.0350758
B52	Lis-1	chr2R_12066878_12068753_+	0.0973973	2.67724	4.58316	3.66579	5.04348	9.40293	7.98401	29.2677	10.1362	7.98401	40.2672	0.0409002
B52	Lk6	chr3R_7582215_7585275_-	0.222185	1.10479	0.588977	2.14076	1.96024	15.603	14.5002	31.0415	15.4285	14.5002	28.4239	0.0994148
B52	Lk6	chr3R_7585802_7589205_-	0.00548491	12.4548	14.224	4.50694	5.08651	37.6329	30.5017	137.47	38.8114	30.5017	155.147	0.00225416
B52	Lmpt	chr3L_16895292_16895477_+	0.250222	0.215835	0.189986	Inf	Inf	0.0591267	0	0.8869	0.0789553	0	1.18433	0.122257
B52	Lnk	chr3R_21716001_21716424_+	0.714359	0.341426	0.0893857	33.7567	22.5387	0.167297	0.0525466	1.7738	0.127999	0.0525466	1.18433	0.228884
B52	Lnk	chr3R_21717790_21718170_+	0.960806	0.162498	0.765931	4.01441	8.93447	0.795981	0.662787	2.6607	1.01338	0.662787	5.92165	0.297155
B52	LpR1	chr3R_21573948_21574748_-	0.160102	0.0260884	0.0237785	9.70889	12.9648	0.144386	0.0913493	0.8869	0.164215	0.0913493	1.18433	0.0683082
B52	LpR1	chr3R_21578718_21580066_-	0.252719	0.0102688	0.00226462	4.608	6.15333	0.238765	0.19247	0.8869	0.258594	0.19247	1.18433	0.124324
B52	LpR2	chr3R_21527384_21531652_-	0.394542	0.117178	0.189986	2.64375	3.53035	1.48893	1.34188	3.5476	1.56825	1.34188	4.73732	0.167568
B52	Lpin	chr2R_4025188_4025492_-	0.285839	1.10266	0.495089	27.021	18.0414	0.538567	0.196936	5.3214	0.420672	0.196936	3.55299	0.139577
B52	Lpin	chr2R_4026098_4026442_-	0.529852	0.881396	0.258667	6.48258	4.32828	1.86819	1.36813	8.869	1.6717	1.36813	5.92165	0.194858
B52	Lpin	chr2R_4027877_4028018_-	0.977357	1.56131	0.189986	20.0916	7.66556	0.702287	0.309	6.2083	0.44631	0.309	2.36866	0.308811
B52	Lpin	chr2R_4030580_4033146_-	0.432468	0.544412	1.16656	2.66782	3.5625	7.01874	6.31643	16.8511	7.39548	6.31643	22.5023	0.175843
B52	MAPk-Ak2	chrX_5654854_5655201_-	0.249854	0.378671	0.427379	3.19571	3.9118	3.81784	3.33034	10.6428	3.97683	3.33034	13.0276	0.119383
B52	MAPk-Ak2	chrX_5655618_5656133_-	0.139096	2.18434	1.2641	18.0024	14.0232	1.26129	0.591187	10.6428	1.10446	0.591187	8.2903	0.0584429
B52	MAPk-Ak2	chrX_5656718_5656815_-	0.23209	0.515222	0.589728	Inf	Inf	0.118253	0	1.7738	0.157911	0	2.36866	0.105014
B52	MAPk-Ak2	chrX_5656966_5658101_-	0.129932	1.59132	1.19895	3.72151	3.61422	6.19423	5.24298	19.5118	6.15673	5.24298	18.9493	0.0544108
B52	MBD-like	chr3R_5385754_5385993_+	0.506295	0.975483	0.297637	11.6083	7.75063	0.782612	0.458413	5.3214	0.664718	0.458413	3.55299	0.190791
B52	MBD-like	chr3R_5386336_5386644_+	0.440154	0.543834	1.17749	10.9213	19.445	0.404764	0.243626	2.6607	0.543205	0.243626	4.73732	0.177589
B52	MCPH1	chr2R_7788900_7789862_-	0.650244	0.543861	1.58659	3.40383	5.59426	3.9301	3.38727	11.5297	4.42474	3.38727	18.9493	0.217568
B52	MED19	chr3L_17837815_17837879_-	0.250222	0.215835	0.189986	Inf	Inf	0.0591267	0	0.8869	0.0789553	0	1.18433	0.122257
B52	MED1	chr3L_21627297_21627361_-	0.202512	0.0533667	0.0388154	6.71774	8.97058	0.182349	0.132024	0.8869	0.202177	0.132024	1.18433	0.0889224
B52	MED31	chr3R_468151_468290_+	0.314296	0.364897	0.548542	4.92421	6.57559	1.13615	0.90055	4.4345	1.23529	0.90055	5.92165	0.148418
B52	MEP-1+CG42245	chr3L_2639873_2640025_+	0.250222	0.215835	0.189986	Inf	Inf	0.0591267	0	0.8869	0.0789553	0	1.18433	0.122257
B52	MEP-1:MEP-1+CG42245	chr3L_2636002_2636761_+	0.389317	0.244361	0.414673	2.26284	2.76989	5.09926	4.7033	10.6428	5.25825	4.7033	13.0276	0.166558
B52	MEP-1	chr3L_2632467_2633537_+	0.267775	0.902129	1.57735	2.31419	2.91369	14.5887	13.4135	31.0415	15.1248	13.4135	39.0829	0.132589
B52	MESK2	chr2R_17389985_17393651_+	0.472866	0.263702	0.554574	1.55904	1.80429	26.5535	25.5994	39.9105	26.972	25.5994	46.1888	0.184123
B52	MESK2	chr2R_17397707_17398371_+	0.404899	0.339	0.614631	3.36468	4.49306	2.44116	2.10873	7.0952	2.59979	2.10873	9.47463	0.169925
B52	MESK2	chr2R_17401088_17401713_+	0.291749	0.399824	0.568006	5.74347	7.66959	0.813004	0.617676	3.5476	0.892318	0.617676	4.73732	0.141378
B52	MESR6	chr3L_19086541_19086762_+	0.21017	0.595689	0.477122	16.1199	16.1444	0.44191	0.220075	3.5476	0.44227	0.220075	3.55299	0.0926082
B52	MFS3	chr2L_1143411_1145443_+	0.926987	1.87628	0.299551	5.49255	3.20885	3.35736	2.58357	14.1904	2.96402	2.58357	8.2903	0.282093
B52	MRP	chr2L_12724344_12724471_+	0.0487785	4.45666	3.11467	9.21868	8.4228	2.82947	1.82793	16.8511	2.73249	1.82793	15.3963	0.0204832
B52	MRP	chr2L_12724619_12724764_+	0.0377314	6.63521	3.97976	13.3639	10.2747	3.99524	2.19007	29.2677	3.54421	2.19007	22.5023	0.0159609
B52	MRP	chr2L_12724912_12725711_+	0.116739	1.60817	1.68489	4.04148	4.29543	12.9334	10.753	43.4581	13.1154	10.753	46.1888	0.0487016
B52	MRP	chr2L_12727117_12728020_+	0.217583	0.898216	1.30679	3.08895	3.84986	4.90658	4.3068	13.3035	5.12506	4.3068	16.5806	0.0967875
B52	MRP	chr2L_12728242_12728577_+	0.288065	0.52473	0.807718	4.59736	6.13912	1.43508	1.15749	5.3214	1.55406	1.15749	7.10598	0.140294
B52	MRP	chr2L_12729406_12729930_+	0.985931	0.293152	0.0280398	2.00395	1.64676	6.13856	5.75348	11.5297	6.00156	5.75348	9.47463	0.317526
B52	MRP	chr2L_12731067_12736035_+	0.740752	0.0218281	0.0901121	2.40457	3.21096	1.21013	1.10652	2.6607	1.26962	1.10652	3.55299	0.234472
B52	MRP	chr2L_12736257_12736592_+	0.246003	0.664111	0.386716	3.75635	3.51125	2.79493	2.36107	8.869	2.75635	2.36107	8.2903	0.114832
B52	MRP	chr2L_12737619_12737958_+	0.891433	0.419573	1.72143	4.00196	8.01608	1.59581	1.3297	5.3214	1.95165	1.3297	10.659	0.26943
B52	MSBP	chrX_15782530_15783334_-	0.6087	0.486586	1.33054	3.33363	6.5714	6.45617	5.58697	18.6249	7.66212	5.58697	36.7142	0.209961
B52	MTF-1	chr3L_9424434_9426785_+	0.764332	0.326063	1.0357	1.87376	2.64115	9.01615	8.51986	15.9642	9.45202	8.51986	22.5023	0.239512
B52	Maf1	chrU_1093155_1097655_-	0.0884147	2.32017	2.95591	12.957	17.3023	1.59916	0.88984	11.5297	1.85694	0.88984	15.3963	0.0369964
B52	Magi	chr2R_17026738_17027105_-	0.242216	0.515563	0.638088	15.1136	20.1821	0.34169	0.176046	2.6607	0.401176	0.176046	3.55299	0.111673
B52	Manf	chr3R_12175750_12176138_+	0.127156	1.50581	1.27215	19.9806	20.011	0.804443	0.355104	7.0952	0.805162	0.355104	7.10598	0.0531923
B52	Mapmodulin	chr2R_13757363_13758833_-	0.248937	0.259163	0.189986	1.76552	1.74637	14.2555	13.5633	23.9463	14.2382	13.5633	23.6866	0.118425
B52	Mapmodulin	chr2R_13759167_13759409_-	0.276965	0.119199	0.142234	6.01364	8.03036	0.393552	0.294963	1.7738	0.433209	0.294963	2.36866	0.136411
B52	Marf	chrX_6262091_6262364_+	0.999998	0.00652942	0.303796	7.33956	19.6019	0.171909	0.120838	0.8869	0.270693	0.120838	2.36866	0.370092
B52	Marf	chrX_6262377_6262558_+	0.412582	0.513948	0.189986	Inf	Inf	0.118253	0	1.7738	0.0789553	0	1.18433	0.171349
B52	Marf	chrX_6263726_6263825_+	0.240668	0.118859	0.0901121	10.3858	13.8687	0.138829	0.0853955	0.8869	0.158658	0.0853955	1.18433	0.110355
B52	Mbs	chr3L_16045275_16045854_+	0.155619	5.67851	2.12571	7.22856	4.70261	6.772	4.78506	34.5891	5.96621	4.78506	22.5023	0.0661565
B52	Mbs	chr3L_16056274_16056398_+	0.650852	0.750247	0.189986	18.0479	9.64017	0.52496	0.245707	4.4345	0.387237	0.245707	2.36866	0.217715
B52	Mbs	chr3L_16057418_16058147_+	0.949802	1.02504	0.157609	7.16759	4.10198	1.22231	0.866164	6.2083	1.04529	0.866164	3.55299	0.291821
B52	Mbs	chr3L_16059930_16061212_+	0.507027	1.79077	0.530517	3.00337	2.2281	9.03802	7.97314	23.9463	8.62593	7.97314	17.7649	0.190964
B52	Mbs	chr3L_16066571_16068573_+	0.810666	0.484591	0.0960283	3.64112	2.70123	2.5782	2.19221	7.9821	2.44084	2.19221	5.92165	0.249075
B52	Mbs	chr3L_16068865_16069329_+	0.301637	0.798056	0.364312	11.2123	8.55568	0.930678	0.553705	6.2083	0.832612	0.553705	4.73732	0.144452
B52	Mbs	chr3L_16070383_16070822_+	0.598562	0.350482	0.885892	8.12777	14.4713	0.482915	0.327359	2.6607	0.621356	0.327359	4.73732	0.207772
B52	Mcr	chr2L_8080613_8082810_-	1	0.215835	0.00137781	3.74553	3.00097	1.40065	1.18395	4.4345	1.34188	1.18395	3.55299	0.377975
B52	Mct1	chrX_2089073_2092664_+	0.99879	0.269594	2.44752	1.88987	4.03785	7.45697	7.03936	13.3035	8.465	7.03936	28.4239	0.344083
B52	Mct1	chrX_2092977_2093852_+	0.867242	0.215835	0.830239	3.74203	6.99572	1.40168	1.18505	4.4345	1.65874	1.18505	8.2903	0.262975
B52	Mdh2	chr3R_14052660_14053426_+	0.298831	0.0879552	0.0336141	2.22148	2.37318	2.15874	1.99619	4.4345	2.17893	1.99619	4.73732	0.143606
B52	Mdr49	chr2R_8832751_8833680_-	0.245473	0.0957789	0.0901121	15.0339	20.0756	0.114187	0.0589934	0.8869	0.134016	0.0589934	1.18433	0.114371
B52	Mec2	chrX_19082317_19083066_+	0.0675989	2.86531	2.49325	3.19848	3.22513	15.5785	13.5871	43.4581	15.6027	13.5871	43.8202	0.028542
B52	Mec2	chrX_19083581_19083672_+	0.250222	0.215835	0.189986	Inf	Inf	0.0591267	0	0.8869	0.0789553	0	1.18433	0.122257
B52	Mef2	chr2R_5809509_5813991_-	0.603759	2.61923	0.667595	6.15286	3.76579	4.64787	3.45946	21.2856	4.09734	3.45946	13.0276	0.208862
B52	Mef2	chr2R_5817121_5821823_-	0.732571	0.0643363	0.189986	1.82147	2.43231	5.64939	5.35607	9.7559	5.86751	5.35607	13.0276	0.233069
B52	Mekk1	chr3R_14559331_14559475_-	0.250222	0.215835	0.189986	Inf	Inf	0.0591267	0	0.8869	0.0789553	0	1.18433	0.122257
B52	Mekk1	chr3R_14564321_14565018_-	0.278078	0.400593	0.208058	3.40038	3.1785	3.02563	2.60824	8.869	2.98705	2.60824	8.2903	0.136946
B52	Meltrin	chr3R_10497526_10498144_-	0.415758	0.63813	0.219468	6.24402	4.76457	1.34188	0.99428	6.2083	1.24382	0.99428	4.73732	0.17199
B52	Men	chr3R_8540855_8545124_-	0.0349199	4.50277	5.19565	3.00777	3.3328	31.4278	27.7177	83.3686	32.0284	27.7177	92.3777	0.0148458
B52	Mes2	chr3L_22939671_22943631_+	0.623824	0.348647	0.911766	1.3556	1.61556	62.2878	60.8454	82.4817	63.3423	60.8454	98.2993	0.213003
B52	Mf	chr3R_11004903_11005043_-	0.238451	0.35093	0.276256	3.78272	4.04103	1.38978	1.1723	4.4345	1.40997	1.1723	4.73732	0.108934
B52	Mfe2	chrX_16166262_16166557_+	0.976532	0.781238	0.0901121	13.008	5.79011	0.736574	0.409087	5.3214	0.539725	0.409087	2.36866	0.308035
B52	Mgat2	chr3R_25842597_25842859_-	0.518821	0.352713	0.80229	17.8744	35.8031	0.210875	0.099237	1.7738	0.329487	0.099237	3.55299	0.19286
B52	Mgat2	chr3R_25842923_25843346_-	0.437649	0.483652	1.02672	7.73978	13.7805	0.498231	0.343769	2.6607	0.636672	0.343769	4.73732	0.176762
B52	Mgat2	chr3R_25843707_25843987_-	0.500112	0.735939	0.218897	20.4608	13.6613	0.398333	0.173385	3.5476	0.319737	0.173385	2.36866	0.189244
B52	Mgat2	chr3R_25845406_25847371_-	0.998037	7.7418	0.668313	11.9901	3.76733	4.35759	2.51495	30.1546	2.97893	2.51495	9.47463	0.3396
B52	Mhcl	chr3R_11923343_11924352_-	0.973824	0.826695	0.101228	5.40316	3.20673	1.91096	1.4773	7.9821	1.69464	1.4773	4.73732	0.305849
B52	Mical	chr3R_5842549_5843294_-	0.182578	0.818601	0.700036	8.92406	9.53345	0.759421	0.496915	4.4345	0.779609	0.496915	4.73732	0.0787717
B52	Mical	chr3R_5867721_5868513_-	0.0661209	3.16316	2.44529	4.33201	4.18898	7.25608	5.93723	25.7201	7.19947	5.93723	24.8709	0.0278448
B52	Mid1	chr2R_20602723_20612861_-	0.145698	0.0192987	0.0193476	8.06628	10.7714	0.161748	0.109952	0.8869	0.181577	0.109952	1.18433	0.061376
B52	Miro	chr3R_19860752_19860985_-	0.114921	3.67086	1.83477	19.4828	13.0082	1.82905	0.8194	15.9642	1.47537	0.8194	10.659	0.0479869
B52	Miro	chr3R_19861049_19861335_-	0.0697002	2.65765	2.79462	16.4789	18.8616	1.53103	0.753484	12.4166	1.65072	0.753484	14.212	0.0293329
B52	Mkrn1	chr3L_21524674_21524857_-	0.266977	0.206839	0.191293	11.7984	15.7551	0.258573	0.150343	1.7738	0.29823	0.150343	2.36866	0.132258
B52	Mkrn1	chr3L_21525132_21525438_-	0.50143	0.325219	0.704685	32.1258	64.3491	0.169787	0.0552143	1.7738	0.288399	0.0552143	3.55299	0.189501
B52	Mkrn1	chr3L_21526287_21526666_-	0.19124	0.918452	0.621688	6.04763	5.76839	1.37202	1.02657	6.2083	1.35291	1.02657	5.92165	0.0829871
B52	Mlc-c	chrX_5514320_5514511_-	0.176721	1.44978	2.3055	7.66285	11.2559	1.67151	1.1574	8.869	1.94875	1.1574	13.0276	0.0761212
B52	Mlc-c	chrX_5514609_5516284_-	0.00740329	13.9685	10.0365	3.56916	3.22554	57.6281	49.201	175.606	56.501	49.201	158.7	0.00312909
B52	Mlc-c	chrX_5516313_5516449_-	0.216123	0.860872	0.518691	9.20679	8.19624	0.894214	0.577987	5.3214	0.855275	0.577987	4.73732	0.0959279
B52	Mlf	chr2R_11824089_11824198_-	0.143722	1.32978	1.03543	41.5432	41.6062	0.316209	0.0853955	3.5476	0.316568	0.0853955	3.55299	0.0604526
B52	Mlf	chr2R_11824832_11825183_-	0.0357124	4.43233	5.02522	7.00291	8.31235	4.78793	3.41948	23.9463	5.08644	3.41948	28.4239	0.0151666
B52	Mlf	chr2R_11825385_11825619_-	0.047068	3.74626	4.61878	4.76943	5.78991	7.6786	6.13652	29.2677	8.09608	6.13652	35.5299	0.0198048
B52	Mlf	chr2R_11825773_11825951_-	0.0246248	7.20733	5.21992	21.8953	19.0683	2.22945	0.931647	20.3987	2.05387	0.931647	17.7649	0.0105513
B52	Mlf	chr2R_11826956_11827279_-	0.965595	0.178897	0.853905	2.30758	4.23699	3.34277	3.07474	7.0952	3.73826	3.07474	13.0276	0.299699
B52	Mmp1	chr2R_20564123_20569736_-	0.717331	0.355378	1.06692	2.08722	2.92655	9.11435	8.49837	17.738	9.58988	8.49837	24.8709	0.229649
B52	Mmp1	chr2R_20569965_20572229_-	0.999941	1.85986	0.0901121	4.52074	2.11288	4.84465	3.92369	17.738	4.2148	3.92369	8.2903	0.361451
B52	Mob2	chr3L_11518777_11520281_-	0.0778122	2.42726	2.41455	7.09154	7.79862	2.98951	2.1261	15.0773	3.08973	2.1261	16.5806	0.0326147
B52	Mob2	chr3L_11535935_11545929_-	0.460543	0.397553	0.843818	1.37324	1.53173	112.526	109.794	150.773	113.686	109.794	168.175	0.181809
B52	Mocs2+CG42503	chr3R_20952165_20952288_-	0.638326	0.628798	0.186811	2.73486	2.05426	5.78882	5.18871	14.1904	5.55339	5.18871	10.659	0.21557
B52	Moe	chrX_8768435_8768535_-	0.999077	0.0904357	0.843818	13.5148	72.1886	0.120376	0.0656241	0.8869	0.37707	0.0656241	4.73732	0.346013
B52	Mpc1	chr3R_14754037_14754110_-	0.439913	0.215835	0.413471	Inf	Inf	0.0591267	0	0.8869	0.157911	0	2.36866	0.177514
B52	Mpcp	chr3L_14532170_14532652_+	0.598066	0.184276	0.407019	6.50835	11.588	0.558939	0.408813	2.6607	0.69738	0.408813	4.73732	0.20767
B52	Mrp4	chr3R_7395557_7396748_+	0.127448	1.45856	1.56035	2.06485	2.14055	69.9222	65.2874	134.809	70.2517	65.2874	139.751	0.0533795
B52	Mrp4	chr3R_7397528_7397989_+	0.57731	0.689323	0.195669	5.88046	4.36251	1.79904	1.35739	7.9821	1.66168	1.35739	5.92165	0.203796
B52	Mtl	chr3R_23462776_23463559_+	0.527815	0.34185	0.775774	4.13435	6.625	1.29673	1.0726	4.4345	1.47482	1.0726	7.10598	0.194587
B52	MtnA	chr3R_5609682_5609945_-	6.26229e-05	130.856	107.322	26.8141	22.6999	71.548	26.2953	705.086	64.3358	26.2953	596.902	6.26229e-05
B52	MtnD	chr3R_16360764_16360829_+	0.174724	0.0308638	0.0294151	9.70889	12.9648	0.144386	0.0913493	0.8869	0.164215	0.0913493	1.18433	0.0750846
B52	Mtor	chr2R_7747569_7747819_+	0.982178	1.35189	0.174488	25.2755	8.43796	0.735014	0.280714	7.0952	0.419911	0.280714	2.36866	0.313254
B52	Mtpalpha	chr2L_9576381_9576517_-	0.678891	0.213845	0.515218	10.5143	21.0605	0.27571	0.168704	1.7738	0.394323	0.168704	3.55299	0.22222
B52	Mvl	chr3R_16881138_16881353_-	0.141163	0.0177739	0.0183357	7.61952	10.1748	0.167765	0.116398	0.8869	0.187594	0.116398	1.18433	0.0593223
B52	Myd88	chr2R_5191841_5192478_-	0.273279	0.792403	0.393545	11.8796	9.51814	0.644033	0.373286	4.4345	0.585266	0.373286	3.55299	0.134929
B52	Myo31DF	chr2L_10495105_10496628_-	0.701214	1.24383	0.289564	6.38095	3.78704	1.69967	1.25093	7.9821	1.48335	1.25093	4.73732	0.226009
B52	Myo61F	chr3L_1325261_1325994_+	0.11399	1.70161	1.47099	6.55098	6.72915	2.41131	1.76	11.5297	2.43222	1.76	11.8433	0.0474942
B52	NAT1	chr2R_8803570_8805362_+	0.000127834	61.4286	54.6145	17.1969	16.5985	30.5696	14.6984	252.767	29.9833	14.6984	243.972	7.67014e-05
B52	NAT1	chr2R_8805410_8805499_+	0.136568	1.68204	1.14242	Inf	Inf	0.295633	0	4.4345	0.236866	0	3.55299	0.0573391
B52	NC2alpha	chr2R_17557794_17558000_+	0.223159	0.675035	0.875873	12.4478	16.6222	0.502506	0.284999	3.5476	0.58182	0.284999	4.73732	0.0999963
B52	ND75	chrX_8145485_8145629_-	0.265908	0.399984	0.511081	12.9293	17.2653	0.369449	0.205788	2.6607	0.428935	0.205788	3.55299	0.131796
B52	NDUFA8	chr2R_20552203_20552376_+	0.250222	0.215835	0.189986	Inf	Inf	0.0591267	0	0.8869	0.0789553	0	1.18433	0.122257
B52	NFAT	chrX_13544101_13546911_+	0.569651	0.199992	0.412782	2.2575	3.01457	4.68384	4.32155	9.7559	4.90195	4.32155	13.0276	0.202329
B52	NK7.1	chr3R_10170907_10175643_-	0.978603	0.00228685	0.0470323	2.70204	3.60819	1.09643	0.9847	2.6607	1.15592	0.9847	3.55299	0.310311
B52	NKAIN	chr2R_20769471_20770153_+	0.603862	2.81771	0.712442	3.26711	2.29619	11.8747	10.3156	33.7022	11.207	10.3156	23.6866	0.208897
B52	NUCB1	chr3L_17792653_17794991_-	0.0182067	8.547	6.43304	10.1281	8.93596	7.88797	4.9038	49.6664	7.49823	4.9038	43.8202	0.00772465
B52	N	chrX_3053267_3057511_+	0.829001	0.215835	0.765351	2.15588	3.51863	3.98778	3.70247	7.9821	4.32415	3.70247	13.0276	0.253055
B52	NaCP60E	chr2R_20780072_20781606_+	0.29671	0.258165	0.329532	13.2162	17.6483	0.24352	0.134214	1.7738	0.283177	0.134214	2.36866	0.142993
B52	NaCP60E	chr2R_20782130_20785424_+	0.450656	0.268876	0.0930905	2.5335	2.25542	3.47272	3.15062	7.9821	3.41431	3.15062	7.10598	0.17997
B52	NaCP60E	chr2R_20788579_20790938_+	0.606963	0.238657	0.588977	1.69966	2.26966	8.19223	7.82714	13.3035	8.48966	7.82714	17.7649	0.209652
B52	Nacalpha	chr2R_8648030_8648231_-	0.999632	2.0241	0.134967	5.65672	2.51791	3.6983	2.82217	15.9642	3.10775	2.82217	7.10598	0.352749
B52	Nap1	chr2R_19793065_19793127_-	0.69906	0.0953842	0.261112	15.4499	41.2622	0.112705	0.057405	0.8869	0.211489	0.057405	2.36866	0.225455
B52	Nap1	chr2R_19793317_19793378_-	0.250222	0.215835	0.189986	Inf	Inf	0.0591267	0	0.8869	0.0789553	0	1.18433	0.122257
B52	Nap1	chr2R_19794246_19794432_-	0.0938333	4.99952	2.36756	15.2557	10.1859	2.94805	1.51153	23.0594	2.43718	1.51153	15.3963	0.0390473
B52	Nc73EF	chr3L_16950628_16952198_+	0.383779	1.60065	0.556401	2.23847	1.85043	18.0147	16.6407	37.2498	17.5842	16.6407	30.7926	0.165475
B52	Nc73EF	chr3L_16953768_16954599_+	0.97683	2.09026	0.260723	2.71142	1.75863	12.7546	11.4484	31.0415	12.0274	11.4484	20.1336	0.308375
B52	Nc73EF	chr3L_16954703_16955434_+	0.984049	1.35784	0.170937	2.76458	1.84585	11.4735	10.2659	28.3808	10.8448	10.2659	18.9493	0.315418
B52	Nca	chr3L_19989370_19989780_+	0.519943	0.350709	0.796568	30.0678	60.2269	0.173314	0.0589934	1.7738	0.291926	0.0589934	3.55299	0.193185
B52	Ncoa6	chr2L_5324910_5325951_-	0.514832	2.88786	0.80229	3.72952	2.57045	8.71343	7.37197	27.4939	8.14379	7.37197	18.9493	0.192271
B52	Nedd4	chr3L_17523523_17523908_+	0.996906	0.219139	0.0133266	11.7455	7.84222	0.259205	0.15102	1.7738	0.219907	0.15102	1.18433	0.335015
B52	Nedd4	chr3L_17526950_17527450_+	0.293468	0.274615	0.367891	1.96108	2.20526	9.14333	8.59277	16.8511	9.28321	8.59277	18.9493	0.14195
B52	Nedd4	chr3L_17532837_17533787_+	0.0644252	2.86261	3.03917	6.68228	7.43603	5.49008	3.98173	26.607	5.69016	3.98173	29.6082	0.0271363
B52	Nedd4	chr3L_17534504_17534775_+	0.962408	0.357324	1.82836	7.73146	24.0899	0.498577	0.34414	2.6607	0.873884	0.34414	8.2903	0.298036
B52	Nedd4	chr3L_17535485_17535650_+	0.290556	0.255207	0.31932	8.60243	11.4873	0.310704	0.206198	1.7738	0.350362	0.206198	2.36866	0.140912
B52	Nedd4	chr3L_17536063_17536195_+	0.262798	0.0925005	0.0976915	6.10986	8.15885	0.389216	0.290318	1.7738	0.428874	0.290318	2.36866	0.130461
B52	Nedd4	chr3L_17536253_17536604_+	0.253047	0.229011	0.186043	5.14427	5.15209	0.880153	0.689621	3.5476	0.880512	0.689621	3.55299	0.124592
B52	Nelf-A	chr3R_17050312_17050497_+	0.997286	0.446349	0.0332916	9.89475	5.28521	0.713923	0.448167	4.4345	0.5762	0.448167	2.36866	0.336442
B52	Nf1	chr3R_21817568_21818121_+	1	0.728853	0.0146122	31.8056	10.618	0.340611	0.11154	3.5476	0.183059	0.11154	1.18433	0.373565
B52	Nha1	chr2L_6864640_6870133_-	0.142055	0.0199203	0.0178652	5.46569	7.29865	0.210576	0.162267	0.8869	0.230404	0.162267	1.18433	0.0598201
B52	Nhe2	chr2L_21118135_21119752_+	0.413197	0.00697597	0.0332542	3.42048	4.56757	0.602263	0.518582	1.7738	0.64192	0.518582	2.36866	0.17142
B52	Nhe2	chr2L_21128063_21128739_+	0.226953	0.902487	0.509112	21.4229	17.1644	0.488831	0.206998	4.4345	0.430064	0.206998	3.55299	0.102028
B52	Nhe2	chr2L_21129083_21130004_+	0.452356	1.0258	0.339819	10.7403	7.17105	0.817192	0.495463	5.3214	0.699298	0.495463	3.55299	0.180303
B52	Nhe3	chr2L_6683130_6683725_-	0.99458	1.0826	0.100827	8.24452	4.12852	1.27624	0.860596	7.0952	1.04009	0.860596	3.55299	0.330098
B52	NijA	chr3L_10688516_10688728_-	0.780758	0.916771	0.189986	Inf	Inf	0.17738	0	2.6607	0.0789553	0	1.18433	0.24291
B52	NijA	chr3L_10688805_10689666_-	0.998962	0.230716	0.0120609	12.4215	8.29359	0.251534	0.142801	1.7738	0.212236	0.142801	1.18433	0.345027
B52	Nipped-A	chr2R_1091784_1098006_-	0.338355	0.946675	0.386505	2.71866	2.23408	9.45373	8.48189	23.0594	9.17972	8.48189	18.9493	0.15482
B52	Nipped-A	chr2R_1135565_1138233_-	0.16665	1.11009	1.3964	2.1212	2.38192	19.7721	18.397	39.0236	20.0918	18.397	43.8202	0.0710546
B52	Nipped-B	chr2R_586657_587893_-	0.881583	0.215835	0.0347337	2.68122	2.23774	2.94286	2.64626	7.0952	2.86462	2.64626	5.92165	0.266758
B52	Nlp	chr3R_25830778_25831009_+	0.999163	0.0301294	0.398698	2.42948	4.86633	1.59939	1.46023	3.5476	1.83662	1.46023	7.10598	0.346728
B52	Nlp	chr3R_25831144_25831755_+	0.102389	1.84401	1.81966	6.77871	7.54333	2.17489	1.57003	10.6428	2.25492	1.57003	11.8433	0.0426904
B52	Nlp	chr3R_25834912_25835399_+	0.318645	1.30684	0.524263	6.55806	4.77674	2.03884	1.48762	9.7559	1.86218	1.48762	7.10598	0.149645
B52	Nmdar2	chrX_1396536_1401462_-	0.275576	0.00678963	0.024807	3.08776	4.12326	0.654418	0.574463	1.7738	0.694076	0.574463	2.36866	0.135894
B52	Nmnat	chr3R_20772018_20772197_+	0.150089	1.7236	1.0563	8.8096	7.84265	1.3778	0.906069	7.9821	1.3194	0.906069	7.10598	0.063609
B52	Nmt	chr3L_8170740_8171222_-	0.310172	0.124067	0.183642	3.38416	4.51907	0.911187	0.786221	2.6607	0.970672	0.786221	3.55299	0.147056
B52	Nop17l	chr2R_3689074_3689490_-	0.10685	1.77881	1.68001	6.62423	7.23741	2.02497	1.47276	9.7559	2.08517	1.47276	10.659	0.0445575
B52	Nop17l	chr2R_3693072_3693730_-	0.572367	0.0885753	0.189986	2.12334	2.83543	2.69382	2.50614	5.3214	2.8128	2.50614	7.10598	0.202816
B52	Nop60B	chr2R_20062920_20062995_+	0.333348	0.424667	0.189986	Inf	Inf	0.118253	0	1.7738	0.0789553	0	1.18433	0.153526
B52	Nop60B	chr2R_20063248_20063439_+	0.155664	1.25705	1.59895	10.2944	13.7467	0.976757	0.603075	6.2083	1.11556	0.603075	8.2903	0.0662145
B52	Nopp140	chr3L_21826078_21826279_+	0.264526	0.124067	0.0780432	1.94138	1.94433	1.94204	1.82736	3.5476	1.9424	1.82736	3.55299	0.131169
B52	Not1	chr2R_5455881_5456067_-	0.500597	0.215835	0.075984	5.51456	4.90928	0.627701	0.482486	2.6607	0.608231	0.482486	2.36866	0.18933
B52	Not1	chr2R_5464201_5464931_-	0.995435	0.128483	0.956995	1.71263	3.20177	5.4246	5.17857	8.869	5.93871	5.17857	16.5806	0.33182
B52	Not3	chr2R_1545723_1548105_-	0.054523	3.32497	3.17249	4.3282	4.58976	8.51285	6.96701	30.1546	8.63434	6.96701	31.9769	0.0227291
B52	Not3	chr2R_1548663_1548723_-	0.236575	0.0877831	0.0897053	13.5148	18.0472	0.120376	0.0656241	0.8869	0.140204	0.0656241	1.18433	0.107581
B52	Npl4	chr3R_21437660_21439526_-	0.989437	0.210034	1.2061	3.08921	7.42537	1.63541	1.43548	4.4345	2.05038	1.43548	10.659	0.32172
B52	Npl4	chr3R_21440041_21444135_-	0.966573	0.786497	0.101228	3.39635	2.26767	5.45132	4.7004	15.9642	5.09764	4.7004	10.659	0.299993
B52	Nrg	chrX_8443390_8444115_+	0.638769	0.215835	0.567949	Inf	Inf	0.0591267	0	0.8869	0.157911	0	2.36866	0.21575
B52	Nrx-1	chr3R_18299481_18303801_+	0.115164	3.17193	6.86894	2.7852	4.11074	20.3109	18.1507	50.5533	21.9148	18.1507	74.6127	0.0480599
B52	Nrx-IV	chr3L_12140061_12141891_+	0.248415	0.138183	0.0901121	2.743	2.93031	1.80452	1.61666	4.4345	1.8247	1.61666	4.73732	0.11789
B52	Nrx-IV	chr3L_12144508_12144919_+	0.439208	0.773396	1.79504	4.93085	8.46572	1.58902	1.25907	6.2083	1.88573	1.25907	10.659	0.177263
B52	Nsun2	chrX_4005618_4005675_-	0.250222	0.215835	0.189986	Inf	Inf	0.0591267	0	0.8869	0.0789553	0	1.18433	0.122257
B52	Ntf-2	chrX_20907665_20908636_+	0.283626	0.281136	0.36255	2.30895	2.74069	3.7587	3.45702	7.9821	3.8582	3.45702	9.47463	0.13883
B52	Ntf-2	chrX_20909022_20909772_+	0.541116	0.635679	1.65992	6.09253	11.39	0.974968	0.727858	4.4345	1.23202	0.727858	8.2903	0.197082
B52	Nup153	chrX_16495232_16495408_+	0.999323	0.227772	0.010675	8.75906	5.84824	0.307263	0.20251	1.7738	0.267965	0.20251	1.18433	0.348777
B52	Nup153	chrX_16500042_16500894_+	0.13986	1.34518	1.09944	4.13878	4.25135	3.3687	2.78577	11.5297	3.38961	2.78577	11.8433	0.0587486
B52	Nup153	chrX_16501033_16501965_+	0.0518412	3.44449	3.42975	6.19442	6.8332	4.43345	3.29308	20.3987	4.57369	3.29308	22.5023	0.0218027
B52	Nup153	chrX_16502034_16503037_+	0.999998	0.162405	3.03917	2.19362	6.95701	3.49186	3.23447	7.0952	4.51899	3.23447	22.5023	0.370715
B52	Nup54	chr2R_8317966_8318099_-	0.778728	0.441391	0.0901121	48.1887	21.4497	0.228913	0.0552143	2.6607	0.130489	0.0552143	1.18433	0.242347
B52	Nup98-96	chr3R_19603343_19603410_-	0.250222	0.215835	0.189986	Inf	Inf	0.0591267	0	0.8869	0.0789553	0	1.18433	0.122257
B52	Nurf-38	chr2R_20447934_20448375_-	0.214138	1.14266	0.625648	5.66969	4.81795	2.25639	1.72071	9.7559	2.15868	1.72071	8.2903	0.0946937
B52	Nxt1	chr2R_19699405_19699461_-	0.257724	0.089773	0.0901121	11.5468	15.4191	0.130815	0.0768094	0.8869	0.150644	0.0768094	1.18433	0.127629
B52	Oatp26F	chr2L_6626763_6627500_-	0.236637	0.0885099	0.0899523	13.5148	18.0472	0.120376	0.0656241	0.8869	0.140204	0.0656241	1.18433	0.107619
B52	Octbeta3R	chr3R_8338746_8338864_-	0.847469	0.0922087	0.317949	19.4178	51.8594	0.101756	0.0456746	0.8869	0.20054	0.0456746	2.36866	0.257653
B52	Oda	chr2R_8057509_8058428_-	0.978154	1.32978	0.180414	2.30698	1.587	13.792	12.6866	29.2677	13.1831	12.6866	20.1336	0.309586
B52	Opa1	chr2R_10121848_10121947_-	0.162945	1.1723	0.847507	8.44507	7.89403	1.57145	1.0502	8.869	1.53287	1.0502	8.2903	0.0694923
B52	Opa1	chr2R_10122065_10122197_-	0.228342	0.861246	0.492626	22.5175	18.0414	0.47944	0.196936	4.4345	0.420672	0.196936	3.55299	0.102915
B52	Opa1	chr2R_10122693_10122790_-	0.221687	0.472754	0.429203	9.78219	10.4502	0.718736	0.453324	4.4345	0.738924	0.453324	4.73732	0.0991237
B52	P58IPK	chr3R_5413359_5413718_+	0.146866	1.40399	0.999121	6.66288	6.15969	2.38372	1.73044	11.5297	2.32567	1.73044	10.659	0.0619537
B52	P5CDh1	chr3L_21832932_21833150_-	0.328844	1.69018	0.637814	6.41409	4.61198	2.44637	1.79756	11.5297	2.23041	1.79756	8.2903	0.15242
B52	P5CDh1	chr3L_21833228_21834125_-	0.994514	0.215835	1.59634	10.5688	35.2829	0.274898	0.167834	1.7738	0.551421	0.167834	5.92165	0.329958
B52	PAN2	chr2R_4815860_4815962_+	0.250222	0.215835	0.189986	Inf	Inf	0.0591267	0	0.8869	0.0789553	0	1.18433	0.122257
B52	PDZ-GEF	chr2L_6324119_6325172_+	0.986632	0.215835	0.0182286	3.31805	2.65847	1.54301	1.33648	4.4345	1.48425	1.33648	3.55299	0.318004
B52	PEK	chr3R_1288532_1288773_-	0.172557	0.941112	0.765931	35.7488	35.8031	0.329128	0.099237	3.5476	0.329487	0.099237	3.55299	0.0740263
B52	PEK	chr3R_1288843_1289452_-	0.235713	0.867203	0.479983	3.78584	3.3703	4.16665	3.51401	13.3035	4.0693	3.51401	11.8433	0.107007
B52	PEK	chr3R_1289618_1289936_-	0.990703	0.928063	0.0901121	2.44385	1.59841	19.4944	17.7827	43.4581	18.4921	17.7827	28.4239	0.323662
B52	PH4alphaEFB	chr3R_26292097_26299755_+	0.999826	0.397053	0.0165105	1.62267	1.34984	34.7248	33.3407	54.1009	34.1183	33.3407	45.0045	0.356457
B52	PH4alphaEFB	chr3R_26299951_26302405_+	0.346544	1.42759	0.539344	2.69704	2.18274	12.0795	10.8518	29.2677	11.7074	10.8518	23.6866	0.157006
B52	PH4alphaEFB	chr3R_26304572_26304840_+	0.940366	0.0318975	0.189986	6.85627	18.3112	0.179859	0.129356	0.8869	0.278643	0.129356	2.36866	0.287225
B52	PH4alphaEFB	chr3R_26305150_26305314_+	0.999146	0.0301294	0.398341	4.29394	17.2018	0.251904	0.206547	0.8869	0.429643	0.206547	3.55299	0.346416
B52	PH4alphaEFB	chr3R_26305503_26309614_+	0.0199855	6.63343	6.79374	10.6593	11.743	5.47136	3.32818	35.476	5.71182	3.32818	39.0829	0.00835263
B52	PH4alphaEFB	chr3R_26310475_26310948_+	0.0444079	4.59568	3.37965	45.0828	36.121	1.54976	0.393454	17.738	1.31469	0.393454	14.212	0.0186086
B52	PHGPx	chr3L_3327554_3327859_+	0.141382	1.43111	1.84003	13.6178	18.1846	0.83939	0.455897	6.2083	0.978191	0.455897	8.2903	0.0594564
B52	PI4KIIIalpha	chrX_2520959_2521456_+	0.292818	0.377011	0.197821	3.51939	3.35689	2.06031	1.76403	6.2083	2.0412	1.76403	5.92165	0.141689
B52	PI4KIIIalpha	chrX_2521517_2521895_+	0.134415	1.39017	1.18639	5.38822	5.53477	2.76579	2.1398	11.5297	2.7867	2.1398	11.8433	0.0564095
B52	PIP5K59B	chr2R_18766136_18767084_+	0.25801	0.0897072	0.0901121	16.8784	22.5387	0.10817	0.0525466	0.8869	0.127999	0.0525466	1.18433	0.127811
B52	PMCA	chr4_371836_372211_-	0.271042	0.260815	0.310137	2.69393	3.59736	2.5648	2.30455	6.2083	2.7036	2.30455	8.2903	0.133897
B52	PNUTS	chr2L_874150_875037_+	0.871161	0.223623	0.859696	2.7821	4.77656	2.49663	2.23151	6.2083	2.79334	2.23151	10.659	0.263963
B52	PP2A-B'	chr3R_13993929_13994162_+	0.32008	0.034617	0.077404	3.50788	4.68427	0.590204	0.505662	1.7738	0.629862	0.505662	2.36866	0.150124
B52	PP2A-B'	chr3R_13995821_13996995_+	0.339474	0.0366292	0.0871075	4.41786	5.89943	0.492993	0.401506	1.7738	0.53265	0.401506	2.36866	0.154976
B52	PPP4R2r	chrX_10373003_10373402_+	0.0071262	12.9166	10.3549	7.19225	6.70295	16.725	11.8381	85.1424	16.3389	11.8381	79.3501	0.0030093
B52	PRL-1	chr2L_16249707_16250080_-	0.374467	1.66485	0.58098	7.51184	5.0155	2.70916	1.88907	14.1904	2.39478	1.88907	9.47463	0.163566
B52	Pabp2	chr2R_4020297_4020446_+	0.40727	0.247752	0.0901121	30.0678	20.0756	0.173314	0.0589934	1.7738	0.134016	0.0589934	1.18433	0.170481
B52	Pabp2	chr2R_4020983_4021119_+	0.935048	0.0759649	0.327475	3.60361	7.21817	0.577667	0.492229	1.7738	0.696279	0.492229	3.55299	0.284486
B52	Pak	chr3R_2177074_2178844_+	0.075063	2.49762	2.70721	3.243	3.57271	12.575	10.9393	35.476	12.8155	10.9393	39.0829	0.0315465
B52	Pak	chr3R_2179973_2180159_+	0.442553	0.427291	0.885892	2.43141	3.60756	3.59619	3.28291	7.9821	3.8536	3.28291	11.8433	0.178117
B52	Pak	chr3R_2180318_2180635_+	0.315341	0.149273	0.189986	3.87417	5.17341	1.09116	0.915705	3.5476	1.17048	0.915705	4.73732	0.148819
B52	Pak	chr3R_2181143_2182154_+	0.159905	1.79517	1.02744	14.3063	11.94	0.935899	0.495949	7.0952	0.857662	0.495949	5.92165	0.0682307
B52	Pak	chr3R_2183063_2183596_+	0.0885205	2.37323	3.13853	11.0392	14.7413	1.74345	1.04443	11.5297	2.00122	1.04443	15.3963	0.0370302
B52	Parp	chr3RHet_1935395_1936749_+	0.453746	0.0576128	0.113434	2.30041	3.07187	1.67586	1.54216	3.5476	1.75517	1.54216	4.73732	0.180663
B52	Past1	chr3R_8525058_8529360_+	0.109312	1.77873	2.05568	1.90086	2.10206	31.6543	29.861	56.7616	32.0549	29.861	62.7695	0.0454415
B52	Pat1	chrX_6485039_6485478_+	0.999497	0.993089	0.064669	2.6875	1.65636	9.54552	8.58025	23.0594	8.95569	8.58025	14.212	0.350636
B52	Patr-1	chr3R_12869411_12869580_+	0.560124	0.330654	0.790896	4.21745	6.75817	1.277	1.05146	4.4345	1.4551	1.05146	7.10598	0.200689
B52	Patr-1	chr3R_12870395_12870624_+	0.257633	0.352454	0.208058	23.6256	21.0324	0.282491	0.112619	2.6607	0.263022	0.112619	2.36866	0.127547
B52	Patronin	chr2R_13409412_13410357_-	0.146014	1.20459	1.26838	3.40218	3.76983	14.2144	12.2522	41.6843	14.5147	12.2522	46.1888	0.0615685
B52	Patronin	chr2R_13410466_13411004_-	0.781526	0.562133	1.92978	2.72775	4.68324	5.07627	4.55196	12.4166	5.66969	4.55196	21.3179	0.24304
B52	Patronin	chr2R_13411404_13411588_-	0.804025	0.458595	0.0901121	7.61112	5.08179	0.67154	0.466107	3.5476	0.592944	0.466107	2.36866	0.247693
B52	Patronin	chr2R_13413922_13414338_-	0.580194	0.215835	0.524053	3.34768	5.36442	1.53197	1.32465	4.4345	1.71007	1.32465	7.10598	0.204553
B52	Patronin	chr2R_13414486_13414718_-	0.479053	0.0345279	0.0901121	2.31765	3.0949	1.66515	1.53069	3.5476	1.74446	1.53069	4.73732	0.185371
B52	Patronin	chr2R_13415881_13416126_-	0.200604	0.698722	0.540349	12.9754	12.9951	0.491689	0.27341	3.5476	0.492049	0.27341	3.55299	0.0880401
B52	Patronin	chr2R_13416358_13416591_-	0.680101	0.236262	0.653629	15.239	30.5244	0.226892	0.116398	1.7738	0.345504	0.116398	3.55299	0.222335
B52	Pax	chr2L_19401373_19403060_-	0.0286822	5.09122	5.93365	3.30739	3.76004	22.8961	19.8436	65.6306	23.4949	19.8436	74.6127	0.0121585
B52	Pax	chr2L_19403717_19403998_-	0.0615147	5.05216	2.82876	19.1608	14.0726	2.04656	0.925744	17.738	1.73254	0.925744	13.0276	0.0258729
B52	Pax	chr2L_19420192_19423278_-	0.184192	1.39252	0.799163	2.06935	1.90995	31.2217	29.144	60.3092	30.9119	29.144	55.6635	0.0795982
B52	Pcd	chr3R_25549311_25549568_+	0.219831	0.670796	0.448861	10.8123	9.62556	0.814109	0.49216	5.3214	0.77517	0.49216	4.73732	0.0980928
B52	Pde11	chr2L_18537688_18538029_-	0.252303	0.0923842	0.0901121	16.0629	21.4497	0.11066	0.0552143	0.8869	0.130489	0.0552143	1.18433	0.124157
B52	Pde11	chr2L_18538186_18539522_-	0.480592	0.0344768	0.0901121	2.11682	2.82671	1.80069	1.67591	3.5476	1.88001	1.67591	4.73732	0.185671
B52	Pde11	chr2L_18539674_18540628_-	0.302299	0.275706	0.385965	8.03361	10.7277	0.486496	0.331196	2.6607	0.545982	0.331196	3.55299	0.144842
B52	Pde11	chr2L_18542004_18543261_-	0.999867	0.263107	0.00969232	4.62213	3.0861	0.952864	0.767526	3.5476	0.874268	0.767526	2.36866	0.358015
B52	Pde11	chr2L_18543716_18546524_-	0.866597	0.00429597	0.0411829	2.24493	2.99779	1.28357	1.1852	2.6607	1.34305	1.1852	3.55299	0.262787
B52	Pde1c	chr2L_11853926_11858890_-	0.994849	0.218053	0.0146422	15.7504	10.5162	0.223365	0.112619	1.7738	0.184067	0.112619	1.18433	0.330657
B52	Pde8	chr2R_19545538_19546822_+	0.0818529	2.38875	2.81078	2.01187	2.23341	39.0574	36.5892	73.6127	39.5978	36.5892	81.7187	0.034314
B52	Pde8	chr2R_19546876_19547027_+	0.90575	0.0911584	0.358394	2.13068	3.31942	2.68577	2.49751	5.3214	2.8837	2.49751	8.2903	0.27438
B52	Pde8	chr2R_19547223_19547894_+	0.66268	6.05527	1.31285	5.24036	2.91573	10.4202	8.12372	42.5712	9.16125	8.12372	23.6866	0.219793
B52	Pde8	chr2R_19548057_19552816_+	0.341067	0.318112	0.502088	1.61437	1.79647	24.019	23.0739	37.2498	24.2991	23.0739	41.4515	0.155368
B52	Pde8	chr2R_19553559_19554657_+	0.287213	1.36494	0.571711	2.69046	2.25828	12.8379	11.5376	31.0415	12.5055	11.5376	26.0552	0.140037
B52	Pde8	chr2R_19554792_19556629_+	0.0790416	7.84802	3.17249	6.76812	4.51893	8.70871	6.28996	42.5712	7.76556	6.28996	28.4239	0.0332002
B52	Pde8	chr2R_19556891_19557424_+	0.782141	1.60676	0.336872	8.3206	4.62957	1.90334	1.27909	10.6428	1.58859	1.27909	5.92165	0.243213
B52	Pde8	chr2R_19557901_19559498_+	0.0569464	3.49884	2.79199	6.88964	6.57152	5.01968	3.60443	24.8332	4.94324	3.60443	23.6866	0.0238356
B52	Pde8	chr2R_19561272_19561808_+	0.188582	1.19081	0.715524	3.05495	2.7912	6.27168	5.51601	16.8511	6.17469	5.51601	15.3963	0.0816641
B52	Pde8	chr2R_19562509_19562629_+	0.201594	0.882026	0.568747	10.5483	9.39048	0.825609	0.504481	5.3214	0.78667	0.504481	4.73732	0.0885301
B52	Pde8	chr2R_19562729_19562877_+	0.519774	0.299102	0.0901121	38.8356	25.9297	0.160883	0.0456746	1.7738	0.121585	0.0456746	1.18433	0.193126
B52	Pde8	chr2R_19562989_19563061_+	0.250222	0.215835	0.189986	Inf	Inf	0.0591267	0	0.8869	0.0789553	0	1.18433	0.122257
B52	Pde8	chr2R_19563512_19564327_+	0.344298	1.0006	2.11084	7.28622	12.9729	1.55461	1.09551	7.9821	1.96994	1.09551	14.212	0.156313
B52	Pdk1	chr3L_129889_131811_+	0.217811	0.0290442	0.0120841	1.40505	1.45931	17.5032	17.043	23.9463	17.5648	17.043	24.8709	0.0969435
B52	Pdk1	chr3L_135385_135457_+	0.244397	0.0967632	0.0901121	16.0629	21.4497	0.11066	0.0552143	0.8869	0.130489	0.0552143	1.18433	0.113335
B52	Pdk1	chr3L_136336_141065_+	0.45298	0.691195	0.222988	2.03677	1.76788	18.6217	17.4178	35.476	18.3094	17.4178	30.7926	0.18056
B52	Pdk	chr2R_5314879_5319475_+	0.795345	0.456412	1.60291	2.76623	4.48546	5.01717	4.48864	12.4166	5.53164	4.48864	20.1336	0.245703
B52	Pdp1	chr3L_7824928_7825653_-	0.976527	0.443542	2.48202	3.22414	7.53441	2.52696	2.20065	7.0952	3.15932	2.20065	16.5806	0.307987
B52	Pdp	chrX_7627523_7628051_-	0.999986	0.479665	0.0144277	25.3175	11.2693	0.275467	0.105093	2.6607	0.177042	0.105093	1.18433	0.366495
B52	Pect	chr2L_13208778_13209435_+	0.972431	1.04067	0.135435	2.07871	1.48044	41.1607	38.3992	79.821	39.6291	38.3992	56.8478	0.304486
B52	Pen	chr2L_10057205_10057621_+	0.591765	0.92801	0.246443	7.82876	5.2271	1.31889	0.9063	7.0952	1.1617	0.9063	4.73732	0.206284
B52	Pep	chr3L_17633154_17634125_-	0.143528	1.28195	1.43915	2.44886	2.68317	15.4889	14.1246	34.5891	15.7095	14.1246	37.8985	0.0603757
B52	Pep	chr3L_17634356_17636462_-	0.0110509	9.91362	8.6045	2.83074	2.76684	102.301	91.1735	258.088	101.913	91.1735	252.262	0.00463436
B52	Pep	chr3L_17636827_17637078_-	0.680436	0.223581	0.622044	3.05352	4.66005	2.3115	2.03316	6.2083	2.52926	2.03316	9.47463	0.22245
B52	Pep	chr3L_17637180_17637990_-	0.0617519	5.87926	3.00209	3.39485	2.75057	26.9633	23.2511	78.9341	25.9646	23.2511	63.9538	0.0260244
B52	Pex23	chr3L_20292329_20292509_-	0.365692	0.221497	0.0901121	38.8356	25.9297	0.160883	0.0456746	1.7738	0.121585	0.0456746	1.18433	0.161476
B52	Pfk	chr2R_6000676_6000789_+	0.312214	0.151255	0.189986	6.12373	8.17737	0.388603	0.28966	1.7738	0.42826	0.28966	2.36866	0.147744
B52	Pfk	chr2R_6000899_6001047_+	0.254989	0.219139	0.171267	5.26389	5.27188	0.865527	0.673951	3.5476	0.865886	0.673951	3.55299	0.125907
B52	Pfk	chr2R_6001157_6001630_+	0.991805	2.94274	0.317949	6.10868	2.83731	4.47659	3.3393	20.3987	3.74832	3.3393	9.47463	0.325314
B52	Pfk	chr2R_6001740_6002421_+	0.0954758	1.99004	1.97472	5.27512	5.70242	4.53699	3.53071	18.6249	4.63757	3.53071	20.1336	0.0397748
B52	Pgd	chrX_2039448_2039522_+	0.172377	0.0301294	0.021747	4.54875	6.07421	0.241105	0.194977	0.8869	0.260934	0.194977	1.18433	0.0738892
B52	Pgd	chrX_2039747_2041207_+	0.0138036	8.4546	8.0871	3.94928	4.0445	35.7408	29.8681	117.958	35.9304	29.8681	120.802	0.00596887
B52	Pgi	chr2R_4799762_4800109_-	0.97766	0.652862	0.0892341	50.6351	22.5387	0.226424	0.0525466	2.6607	0.127999	0.0525466	1.18433	0.309392
B52	Pgi	chr2R_4800693_4800937_-	0.980957	1.60858	0.189986	11.1114	4.9459	1.20262	0.718371	7.9821	0.907345	0.718371	3.55299	0.312098
B52	Pgk	chr2L_2748256_2748319_-	0.992556	0.0904419	0.593469	16.0629	64.3491	0.11066	0.0552143	0.8869	0.288399	0.0552143	3.55299	0.326726
B52	Pgk	chr2L_2749314_2750078_-	0.244436	0.307963	0.219468	1.78467	1.81121	13.0738	12.4239	22.1725	13.0958	12.4239	22.5023	0.113372
B52	Pgk	chr2L_2750990_2752444_-	0.277821	0.508382	0.268362	1.76994	1.65445	26.3405	25.0545	44.345	26.1477	25.0545	41.4515	0.136796
B52	Pgm	chr3L_16120661_16121194_-	0.60984	0.234593	0.581806	9.71779	17.3023	0.432924	0.273797	2.6607	0.571365	0.273797	4.73732	0.210134
B52	PhKgamma	chrX_11589418_11589856_+	0.348432	0.185335	0.245989	3.86956	5.16725	1.09218	0.916796	3.5476	1.1715	0.916796	4.73732	0.157345
B52	PhKgamma	chrX_11591785_11592331_+	0.999962	0.460488	0.0150397	23.8542	10.618	0.281484	0.11154	2.6607	0.183059	0.11154	1.18433	0.362986
B52	PhKgamma	chrX_11592631_11593355_+	0.21404	0.750748	0.492626	2.61323	2.52027	6.766	6.10899	15.9642	6.72814	6.10899	15.3963	0.0946348
B52	PhKgamma	chrX_11593440_11594653_+	0.998546	3.18236	0.258187	3.18671	1.78133	13.712	11.9674	38.1367	12.5908	11.9674	21.3179	0.34255
B52	PhKgamma	chrX_11595161_11597322_+	0.218615	0.813437	0.498519	2.01415	1.92115	13.163	12.3294	24.8332	13.0865	12.3294	23.6866	0.097353
B52	Phb2	chr2R_14708344_14708545_+	0.740166	0.575821	1.87385	12.6673	29.6019	0.497896	0.28006	3.5476	0.814076	0.28006	8.2903	0.234306
B52	Phk-3	chr2R_20858841_20859297_-	0.279739	0.346543	0.189986	Inf	Inf	0.118253	0	1.7738	0.0789553	0	1.18433	0.137649
B52	Phm	chr2R_19875199_19875636_-	0.215433	0.531977	0.509112	4.97175	5.53255	1.35373	1.07033	5.3214	1.39375	1.07033	5.92165	0.0955169
B52	Pi3K21B	chr2L_298404_299032_+	0.293641	0.647312	0.317949	4.60411	3.91245	2.62809	2.11896	9.7559	2.53038	2.11896	8.2903	0.142071
B52	Pi3K21B	chr2L_299919_301705_+	0.195702	2.42828	1.10819	5.25507	4.00994	6.06608	4.72557	24.8332	5.67382	4.72557	18.9493	0.0854689
B52	Pi4KIIalpha	chr3R_1385916_1386498_-	0.254251	0.582592	0.333264	6.97416	6.20866	1.06691	0.763017	5.3214	1.02797	0.763017	4.73732	0.125375
B52	Pi4KIIalpha	chr3R_1387089_1387988_-	0.0684927	3.00558	2.38205	4.16074	4.07445	7.74226	6.39478	26.607	7.70548	6.39478	26.0552	0.0289135
B52	Pif1B+Pif1A	chr3R_4610315_4611451_-	0.925146	0.215835	0.0300452	8.60391	5.74465	0.310671	0.206162	1.7738	0.271373	0.206162	1.18433	0.281168
B52	Pif1B	chr3R_4624232_4625183_-	0.715344	0.0918617	0.243297	4.32115	8.65543	0.501379	0.410492	1.7738	0.619992	0.410492	3.55299	0.229206
B52	Pino	chr2L_1116691_1117443_-	0.351745	0.129968	0.189986	2.69162	3.59427	1.09999	0.988514	2.6607	1.15948	0.988514	3.55299	0.158028
B52	Pis	chrX_15596696_15596845_-	0.26757	0.339009	0.405475	30.0678	40.1512	0.173314	0.0589934	1.7738	0.212971	0.0589934	2.36866	0.132473
B52	Pis	chrX_15597352_15597602_-	0.252791	0.215835	0.201224	8.44614	11.2786	0.314266	0.210013	1.7738	0.353923	0.210013	2.36866	0.124391
B52	Pitslre	chr3L_20764965_20765704_+	0.0835545	2.27813	2.3618	6.34445	7.26181	2.65438	1.95708	12.4166	2.77407	1.95708	14.212	0.0349927
B52	Pk17E	chrX_18683123_18684194_+	0.998397	0.0930542	0.822545	3.55963	9.50676	0.875015	0.747466	2.6607	1.17137	0.747466	7.10598	0.341327
B52	Pk17E	chrX_18691721_18698872_+	0.314938	0.0627832	0.0901121	5.2839	7.05589	0.431573	0.335699	1.7738	0.47123	0.335699	2.36866	0.148619
B52	Pkc98E	chr3R_24865087_24865551_+	0.496015	1.18832	0.367232	7.5932	5.06982	1.68142	1.16802	8.869	1.48493	1.16802	5.92165	0.188535
B52	Pkc98E	chr3R_24865795_24866817_+	0.222194	0.539989	0.398341	2.70412	2.66071	6.9396	6.23164	16.8511	6.92157	6.23164	16.5806	0.0994342
B52	Pkc98E	chr3R_24867963_24868547_+	0.042599	4.03023	3.84113	6.0964	6.57533	5.06759	3.78246	23.0594	5.18836	3.78246	24.8709	0.0178338
B52	Pkc98E	chr3R_24868580_24870088_+	0.0342899	7.20204	4.28724	4.8731	4.0553	15.8005	12.5579	61.1961	15.1158	12.5579	50.9262	0.0145783
B52	Pkn	chr2R_5171635_5172349_-	1	1.55138	0.024807	3.67772	1.69999	7.38932	6.27003	23.0594	6.56262	6.27003	10.659	0.378137
B52	Plap	chr2L_1168639_1168694_-	0.973966	0.758703	0.0901121	80.3144	21.4497	0.347167	0.0552143	4.4345	0.130489	0.0552143	1.18433	0.306044
B52	Plc21C	chr2L_310606_317742_+	0.596558	0.350709	0.885892	1.47884	1.77445	42.702	41.381	61.1961	43.5175	41.381	73.4284	0.207331
B52	Plc21C	chr2L_335549_336017_+	0.238314	0.079938	0.0871075	9.68436	12.9321	0.144602	0.0915807	0.8869	0.164431	0.0915807	1.18433	0.10882
B52	Plc21C	chr2L_338119_339206_+	0.25561	0.238702	0.219468	4.3399	4.82943	1.49917	1.22616	5.3214	1.53919	1.22616	5.92165	0.126222
B52	Plc21C	chr2L_340856_342578_+	0.259828	0.296782	0.189986	5.93266	5.94167	0.794619	0.597978	3.5476	0.794978	0.597978	3.55299	0.128866
B52	Plc21C	chr2L_347937_355383_+	0.990788	0.0218281	0.201224	2.20139	3.67456	1.7406	1.61152	3.5476	1.89887	1.61152	5.92165	0.323851
B52	Pli	chr3R_19714914_19715415_-	0.228155	0.644359	0.413276	2.99333	2.85512	4.69932	4.14808	12.4166	4.6611	4.14808	11.8433	0.102895
B52	Plod	chr3L_11193688_11194450_-	0.425518	0.0911892	0.176183	1.64874	2.00151	6.1731	5.91718	9.7559	6.31226	5.91718	11.8433	0.174275
B52	Pop2	chr3L_11992097_11992711_-	0.590804	0.604613	1.67225	6.07205	11.3517	0.97726	0.730314	4.4345	1.23431	0.730314	8.2903	0.206183
B52	Pp1alpha-96A	chr3R_20344915_20345317_+	0.28183	0.245313	0.145664	9.66854	8.6073	0.434226	0.275192	2.6607	0.414756	0.275192	2.36866	0.138221
B52	Pp1alpha-96A	chr3R_20345810_20346064_+	0.247945	0.0940746	0.0901121	8.58788	11.4679	0.155515	0.103273	0.8869	0.175344	0.103273	1.18433	0.117281
B52	Pp2A-29B	chr2L_8369031_8369222_+	0.626553	1.02507	0.26445	4.00459	2.83106	4.51916	3.765	15.0773	4.2246	3.765	10.659	0.213462
B52	Pp4-19C	chrX_20294034_20294672_-	0.999878	0.428121	0.0172602	1.69845	1.35351	33.8828	32.3753	54.9878	33.1383	32.3753	43.8202	0.358231
B52	Ppn	chr3R_24348983_24349248_-	0.987092	0.215835	0.0181766	11.4845	7.66798	0.262408	0.154451	1.7738	0.22311	0.154451	1.18433	0.318673
B52	Ppn	chr3R_24357302_24365640_-	0.325195	4.37175	1.38075	4.26605	2.90896	11.8987	9.77117	41.6843	11.0147	9.77117	28.4239	0.151686
[truncated: 13,485 more rows]
